# Supplementary material for: Temporal dynamics of the developing lung transcriptome in three common inbred strains of laboratory mice reveals multiple stages of postnatal alveolar development
Source: PubMed Central journal article supplement (PMC4991849; doi:10.7717/peerj.2318), 2016-08-09

### A Wnt/Frizzled-related genes

| PC1          | PC2         | PC3          | PC4   | PC5          | PC6          | PC7          | PC8          | PC9          | PC10         | strain   | strain*stage | MGI ID       | Symbol |
|--------------|-------------|--------------|-------|--------------|--------------|--------------|--------------|--------------|--------------|----------|--------------|--------------|--------|
| -0.14        | <b>0.66</b> | <b>-0.52</b> | 0.08  | <b>-0.22</b> | 0.00         | 0.17         | -0.08        | -0.10        | 0.08         | 0.0614   | 0.0186*      | MGI:11996625 | Fzd1   |
| 0.73         | -0.16       | 0.16         | 0.11  | -0.05        | <b>-0.25</b> | <b>-0.43</b> | 0.04         | 0.12         | <b>-0.14</b> | 0.1248   | <.0001**     | MGI:12136761 | Fzd10  |
| <b>0.88</b>  | 0.30        | -0.02        | 0.11  | 0.05         | 0.04         | -0.07        | <b>-0.14</b> | -0.08        | 0.04         | 0.0975   | 0.0039*      | MGI:1388513  | Fzd2   |
| <b>0.88</b>  | -0.21       | -0.11        | 0.18  | 0.07         | <b>-0.18</b> | -0.16        | 0.05         | 0.00         | -0.01        | 0.0011*  | <.0001**     | MGI:108476   | Fzd3   |
| <b>-0.91</b> | 0.15        | -0.10        | 0.12  | 0.05         | 0.02         | -0.06        | 0.13         | 0.01         | -0.02        | <.0001** | 0.0080*      | MGI:108520   | Fzd4   |
| <b>-0.92</b> | 0.20        | -0.07        | 0.09  | 0.05         | -0.01        | 0.01         | 0.06         | <b>0.15</b>  | -0.06        | <.0001** | 0.0256*      | MGI:108474   | Fz6    |
| <b>0.92</b>  | 0.19        | -0.05        | 0.11  | -0.11        | 0.04         | -0.03        | <b>-0.19</b> | 0.00         | 0.01         | 0.2761   | 0.0112*      | MGI:1926790  | Fzr1   |
| <b>0.87</b>  | -0.07       | -0.04        | 0.02  | -0.09        | -0.06        | -0.06        | -0.08        | <b>-0.17</b> | <b>0.22</b>  | 0.3767   | <.0001**     | MGI:108078   | Sfrp2  |
| <b>-0.58</b> | <b>0.43</b> | <b>-0.40</b> | -0.05 | -0.07        | <b>-0.26</b> | -0.02        | 0.04         | <b>0.28</b>  | <b>-0.16</b> | <.0001** | <.0001**     | MGI:1344332  | Wnt1   |
| -0.08        | <b>0.32</b> | <b>-0.72</b> | 0.09  | -0.27        | 0.00         | -0.08        | -0.06        | -0.02        | 0.09         | 0.3774   | <.0001**     | MGI:101948   | Wnt11  |
| 0.44         | <b>0.66</b> | 0.01         | -0.04 | -0.06        | 0.18         | <b>0.23</b>  | -0.14        | 0.01         | 0.08         | 0.0213*  | 0.0004*      | MGI:98954    | Wnt2   |
| 0.64         | -0.23       | 0.01         | -0.07 | -0.07        | <b>0.29</b>  | <b>0.10</b>  | <b>0.27</b>  | <b>-0.30</b> | <b>0.14</b>  | <.0001** | <.0001**     | MGI:1261834  | Wnt2b  |
| -0.23        | <b>0.51</b> | <b>-0.49</b> | 0.06  | 0.03         | -0.13        | <b>-0.39</b> | 0.03         | 0.00         | -0.07        | <.0001** | 0.0027*      | MGI:98958    | Wnt5a  |
| -0.76        | -0.08       | 0.05         | 0.27  | 0.04         | -0.06        | -0.22        | 0.03         | <b>0.14</b>  | -0.04        | 0.9552   | <.0001**     | MGI:98961    | Wnt7a  |
| <b>0.84</b>  | 0.16        | -0.01        | -0.04 | -0.07        | <b>0.23</b>  | <b>0.22</b>  | <b>-0.25</b> | -0.08        | 0.10         | 0.038*   | 0.0444*      | MGI:98962    | Wnt7b  |

### AU vs B6

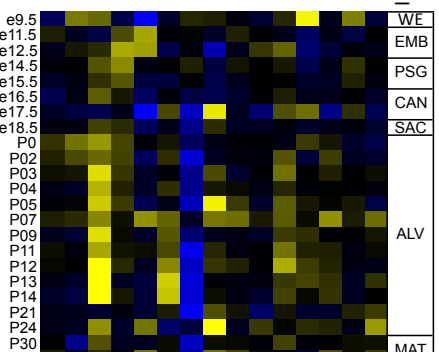

### CH3 vs B6

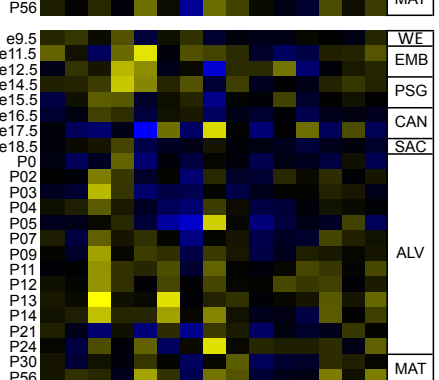

### B Annotated with pulmonary fibrosis (MP:0006050)

| PC1          | PC2          | PC3          | PC4         | PC5         | PC6          | PC7          | PC8         | PC9          | PC10         | strain   | strain*stage | MGI ID      | Symbol   |
|--------------|--------------|--------------|-------------|-------------|--------------|--------------|-------------|--------------|--------------|----------|--------------|-------------|----------|
| <b>-0.89</b> | <b>0.34</b>  | 0.15         | -0.06       | 0.03        | 0.12         | <b>0.18</b>  | 0.00        | 0.03         | -0.01        | 0.0346   | 0.2320       | MGI:102709  | Cap1     |
| -0.66        | -0.11        | -0.05        | <b>0.30</b> | 0.12        | -0.15        | 0.17         | 0.04        | <b>0.36</b>  | <b>0.14</b>  | <.0001** | <.0001**     | MGI:109177  | Cd59a    |
| <b>-0.54</b> | <b>0.39</b>  | 0.19         | 0.01        | <b>0.45</b> | 0.06         | <b>0.33</b>  | -0.09       | <b>0.16</b>  | <b>0.03</b>  | <.0001** | <.0001**     | MGI:88388   | Ctr      |
| <b>-0.85</b> | 0.22         | 0.11         | -0.06       | 0.13        | -0.02        | <b>-0.20</b> | -0.04       | -0.06        | <b>0.17</b>  | 0.1330   | 0.0695       | MGI:103159  | Cish     |
| <b>-0.97</b> | 0.15         | -0.11        | 0.06        | -0.15       | 0.05         | -0.07        | 0.08        | 0.04         | -0.01        | 0.0015   | 0.0089       | MGI:2135755 | Cox412   |
| 0.03         | -0.01        | 0.18         | -0.09       | 0.00        | <b>0.24</b>  | <b>-0.25</b> | 0.09        | 0.03         | 0.04         | 0.0001*  | <.0001**     | MGI:1891837 | Cpb2     |
| -0.75        | -0.24        | -0.21        | <b>0.24</b> | -0.07       | 0.03         | 0.15         | 0.14        | <b>0.21</b>  | <b>0.21</b>  | <.0001** | <.0001**     | MGI:107823  | Ctck     |
| <b>0.97</b>  | -0.05        | 0.02         | 0.15        | 0.02        | -0.02        | 0.09         | 0.03        | -0.01        | -0.02        | 0.8643   | 0.4995       | MGI:1861727 | Dkl1     |
| -0.56        | 0.00         | <b>-0.32</b> | 0.10        | -0.08       | 0.11         | -0.16        | -0.13       | 0.05         | 0.11         | 0.0470   | 0.9061       | MGI:95295   | Egr1     |
| <b>-0.84</b> | <b>0.35</b>  | 0.03         | 0.03        | 0.05        | 0.02         | 0.17         | 0.15        | -0.01        | -0.05        | <.0001** | <.0001**     | MGI:102805  | Entpd1   |
| -0.73        | -0.21        | -0.12        | 0.26        | 0.11        | 0.02         | 0.15         | 0.06        | <b>0.24</b>  | <b>0.23</b>  | <.0001** | <.0001**     | MGI:96470   | Hbegf    |
| 0.28         | -0.24        | -0.16        | <b>0.32</b> | <b>0.30</b> | -0.10        | 0.16         | <b>0.19</b> | <b>0.40</b>  | <b>0.43</b>  | 0.8926   | <.0001**     | MGI:106911  | Hcfs     |
| <b>-0.82</b> | -0.03        | -0.08        | 0.16        | -0.16       | <b>0.20</b>  | <b>-0.20</b> | <b>0.21</b> | <b>-0.14</b> | <b>0.16</b>  | <.0001** | <.0001**     | MGI:96052   | Hck      |
| -0.54        | 0.16         | 0.14         | 0.13        | 0.09        | -0.07        | <b>-0.39</b> | 0.15        | -0.04        | -0.05        | 0.0376   | 0.0070       | MGI:96396   | Id1      |
| <b>-0.81</b> | -0.13        | 0.04         | 0.21        | <b>0.22</b> | -0.14        | 0.10         | -0.01       | 0.06         | <b>0.14</b>  | 0.0032   | <.0001**     | MGI:96820   | Lpl      |
| -0.75        | 0.31         | 0.06         | 0.05        | <b>0.45</b> | 0.00         | -0.03        | 0.06        | -0.01        | 0.07         | 0.0005   | <.0001**     | MGI:107448  | Lyst     |
| <b>-0.81</b> | 0.33         | <b>0.36</b>  | 0.06        | 0.04        | 0.05         | 0.13         | 0.13        | -0.07        | -0.08        | 0.0026   | 0.4401       | MGI:108420  | Nfe2l2   |
| -0.29        | -0.21        | <b>-0.55</b> | 0.19        | -0.15       | -0.10        | -0.08        | 0.02        | <b>-0.21</b> | <b>0.26</b>  | <.0001** | 0.0004       | MGI:97610   | Plat     |
| 0.00         | 0.02         | 0.17         | -0.13       | -0.02       | <b>0.19</b>  | <b>-0.30</b> | 0.03        | 0.02         | 0.05         | 0.0001*  | 0.0005       | MGI:97620   | Pdg      |
| -0.87        | -0.08        | 0.24         | 0.14        | 0.07        | 0.03         | 0.13         | 0.03        | <b>0.19</b>  | 0.13         | <.0001** | <.0001**     | MGI:97747   | Pparg    |
| <b>-0.89</b> | -0.18        | 0.15         | 0.06        | 0.04        | 0.01         | 0.08         | -0.03       | -0.05        | <b>0.18</b>  | 0.00140  | 0.0246       | MGI:109284  | Psen2    |
| <b>-0.77</b> | <b>-0.42</b> | 0.15         | 0.18        | -0.07       | -0.03        | 0.13         | -0.16       | -0.03        | -0.02        | <.0001** | <.0001**     | MGI:97798   | Ptgs2    |
| <b>-0.96</b> | -0.08        | 0.03         | 0.05        | 0.05        | -0.01        | -0.11        | 0.05        | -0.08        | 0.08         | 0.0001*  | <.0001**     | MGI:109515  | Sfpd     |
| -0.63        | <b>-0.33</b> | 0.11         | 0.21        | -0.03       | 0.08         | 0.09         | 0.14        | 0.13         | <b>0.22</b>  | <.0001** | <.0001**     | MGI:98389   | Spp1     |
| -0.34        | 0.02         | -0.20        | 0.05        | <b>0.26</b> | <b>-0.38</b> | -0.03        | -0.09       | <b>0.35</b>  | <b>-0.12</b> | <.0001** | <.0001**     | MGI:98385   | Spra1    |
| <b>-0.85</b> | <b>0.41</b>  | 0.05         | 0.06        | -0.09       | 0.14         | 0.07         | -0.14       | -0.04        | 0.07         | 0.0011   | 0.0537       | MGI:1314884 | Trnrf51a |
| <b>-0.93</b> | -0.10        | -0.16        | 0.17        | -0.06       | -0.04        | 0.00         | 0.05        | -0.01        | 0.04         | 0.0084   | 0.9569       | MGI:1314883 | Trnrf51b |
| <b>-0.93</b> | 0.03         | -0.20        | 0.12        | -0.12       | 0.01         | 0.04         | -0.04       | 0.01         | 0.05         | 0.1260   | 0.6280       | MGI:98834   | Trp53    |
| <b>-0.93</b> | 0.26         | 0.01         | 0.04        | 0.08        | 0.01         | 0.01         | -0.08       | 0.06         | -0.09        | <.0001** | 0.0001*      | MGI:1917649 | Wwtr1    |

### AU vs B6

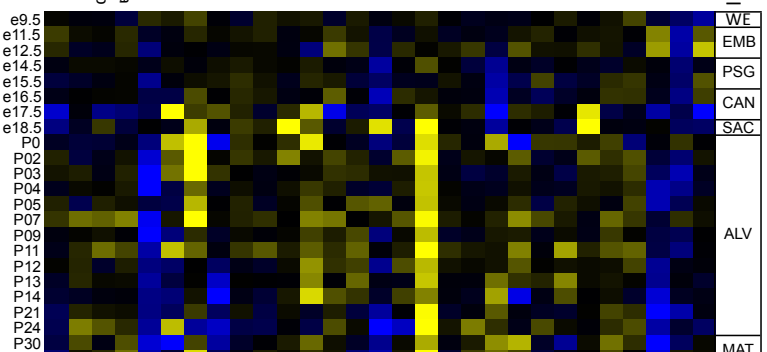

### CH3 vs B6

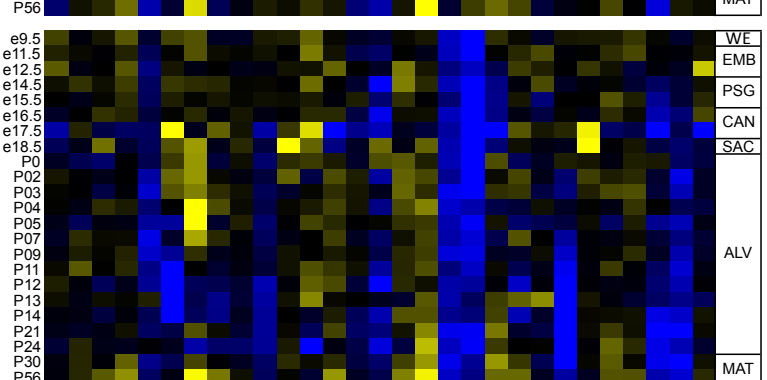

Supplement: peerj-04-2318-s019.pdf [file peerj-04-2318-s019.pdf]
