# Supplementary material for: Temporal dynamics of the developing lung transcriptome in three common inbred strains of laboratory mice reveals multiple stages of postnatal alveolar development
Source: PeerJ. 2016 Aug 9;4:e2318. doi: 10.7717/peerj.2318 (PMC4991849; doi:10.7717/peerj.2318)
Supplement: Data S5 [file peerj-04-2318-s005.xlsx]

## Sheet: WEvsEMB
UPREGULATED			DOWNREGULATED
MGI_ID	Symbol	FoldChange	MGI_ID	Symbol	FoldChange
MGI:101762	Elk3	1.55649	MGI:97451	Otx2	0.228114
MGI:101781	Sntb1	1.27143	MGI:1913893	Lix1	0.206441
MGI:101900	Mmp14	1.71442	MGI:97490	Pax6	0.335348
MGI:101948	Wnt11	1.5608	MGI:2683547	Plch1	0.347515
MGI:102541	Tbx5	3.60482	MGI:102780	Six1	0.340851
MGI:102556	Tbx4	2.7263	MGI:103220	Meox1	0.357001
MGI:102643	Myh11	2.4666	MGI:1195266	Tnfaip6	0.414667
MGI:102720	Ednrb	1.82109	MGI:106679	Zic2	0.375363
MGI:102768	Mfge8	1.36255	MGI:1913762	Dera	0.661126
MGI:102793	Fstl1	1.38145	MGI:88270	Car3	0.520785
MGI:102889	Vcan	1.40319	MGI:96190	Hoxb9	0.337424
MGI:102891	Adcy7	1.23489	MGI:2663253	Mogat2	0.385254
MGI:103009	Epb4.1l2	1.61173	MGI:1889585	Sall1	0.347826
MGI:103151	Pltp	1.50687	MGI:97487	Pax3	0.368298
MGI:103188	Nfib	4.28818	MGI:1096383	Fgf15	0.292608
MGI:103307	Cacnb3	1.39518	MGI:95794	Lrp2	0.435213
MGI:104564	Cdkn1c	1.67993	MGI:1918387	Rfx4	0.377534
MGI:104589	Actg2	2.2945	MGI:1915528	Ddx39	0.601611
MGI:104611	Mdfic	1.61587	MGI:1929022	Polr1e	0.617732
MGI:104651	Cd82	1.61597	MGI:2387203	Ppat	0.588988
MGI:104684	Eps8	1.37251	MGI:1858960	Elovl2	0.45256
MGI:104687	Col4a4	1.17633	MGI:104659	Dll1	0.444001
MGI:104717	Meis1	1.73567	MGI:1917135	Aunip	0.552111
MGI:104723	Fgf9	1.35829	MGI:2445415	Pknox2	0.488646
MGI:104769	Fkbp10	1.61437	MGI:107622	Usp39	0.710128
MGI:104793	Runx1t1	1.43509	MGI:97831	Ppa1	0.644513
MGI:104850	Cd55	1.58119	MGI:2181669	Ormdl1	0.582936
MGI:104993	Lepr	1.22603	MGI:1915955	Gtf2f2	0.673468
MGI:105052	Il13ra1	1.72282	MGI:1913414	Nip7	0.5816
MGI:105081	Tes	1.40855	MGI:1098547	Nhp2	0.651378
MGI:105085	Rbl2	1.31249	MGI:98872	Twist1	0.191925
MGI:105373	Ptch1	1.47654	MGI:1306784	Cited2	0.540883
MGI:105377	Adam19	1.31036	MGI:1929772	Dpysl5	0.479765
MGI:105378	Adam12	1.8014	MGI:1927489	Pdlim5	0.442034
MGI:105923	Ednra	2.5683	MGI:97267	Myl4	0.208305
MGI:105925	Cdo1	1.58665	MGI:98347	Snrpn	0.556744
MGI:106008	Anxa5	1.61052	MGI:1927344	Gmnn	0.677326
MGI:106018	St8sia4	1.55197	MGI:97775	Prps1	0.560513
MGI:106096	Loxl1	1.31715	MGI:1095413	Lfng	0.599762
MGI:106190	Bcl11a	2.63261	MGI:1353494	Akr1b3	0.62763
MGI:106510	Lurap1l	1.42137	MGI:101895	Pou3f2	0.382538
MGI:106603	Serpinb9	1.57151	MGI:2449057	Gars	0.720139
MGI:106653	Epcam	1.40255	MGI:98822	Tfrc	0.63477
MGI:106664	Cd93	1.61841	MGI:1858232	Nudt5	0.654555
MGI:107341	Ctss	1.59409	MGI:1930957	Nudt11	0.478006
MGI:107434	Cdh8	1.45169	MGI:96240	Hspb1	0.45793
MGI:107490	Pdcd4	1.32732	MGI:1890546	Lin28a	0.35277
MGI:107557	Sema3c	1.33072	MGI:1913672	Dctpp1	0.599798
MGI:107633	Lxn	1.80703	MGI:1338850	Mthfd2	0.610621
MGI:107687	Mdfi	1.28212	MGI:2385071	Etf1	0.684926
MGI:107706	Itm2a	1.69178	MGI:102844	Mybpc3	0.346841
MGI:107728	Myo1d	1.33307	MGI:1924536	Nkrf	0.586964
MGI:107752	Myo1b	1.31378	MGI:2153072	Trim37	0.592403
MGI:107928	Aldh1a2	1.56214	MGI:2661430	Kbtbd8	0.422935
MGI:107941	Emp1	2.84663	MGI:1341155	Gldc	0.364683
MGI:108046	Laptm5	1.4208	MGI:1922019	Pik3cb	0.619593
MGI:108056	Nfia	2.38071	MGI:1352459	Nr6a1	0.27542
MGI:108067	Nkx2-1	1.69139	MGI:1346036	Pin1	0.659506
MGI:108110	Sparcl1	2.45364	MGI:2147351	Me2	0.648016
MGI:108470	St6gal1	1.44429	MGI:2444710	Prtg	0.153652
MGI:109149	Nsg1	1.38194	MGI:2442510	Dars2	0.697755
MGI:109151	Ltbp1	1.91553	MGI:104672	Tfap2b	0.508593
MGI:109235	Itpkb	1.33905	MGI:1345192	Psmd13	0.62657
MGI:109249	Adamts1	1.28966	MGI:102726	Dck	0.707622
MGI:109321	Lama4	1.68684	MGI:2136761	Fzd10	0.518046
MGI:109354	Ucp2	1.58617	MGI:1933118	Pgam2	0.584193
MGI:109442	Itga8	2.22569	MGI:95663	Gata3	0.624003
MGI:109496	Lgals9	1.23503	MGI:3513977	Apcdd1	0.623225
MGI:109497	Gata5	1.93171	MGI:109359	Nek2	0.636023
MGI:109517	Sftpc	1.93748	MGI:1274784	Gpr98	0.423399
MGI:1095407	Bmpr2	1.44987	MGI:1914372	Nrarp	0.442486
MGI:1095412	Unc5c	2.67941	MGI:1929865	Nampt	0.586554
MGI:1095418	Tfpi	1.51469	MGI:1346022	Mab21l2	0.361639
MGI:109591	Nfic	1.28014	MGI:1914848	Uchl5	0.634176
MGI:1096393	Snai2	2.18569	MGI:1891840	Ncbp1	0.708996
MGI:1096867	Etv5	2.19112	MGI:1921447	Gtf2e1	0.661487
MGI:1097680	C3ar1	1.36623	MGI:106683	Zic1	0.316925
MGI:1098296	Cpt1a	1.56725	MGI:2444268	Fam169a	0.480741
MGI:1098434	Rgs5	1.5889	MGI:3576497	Greb1l	0.361446
MGI:1098535	Camk1	1.3857	MGI:109344	Eya1	0.433684
MGI:1098566	Gypc	1.39123	MGI:105073	Tnni1	0.333979
MGI:1098729	Emp3	2.03532	MGI:1926186	Wdr76	0.600254
MGI:1098776	Lbp	1.35699	MGI:2139360	Sall4	0.319378
MGI:1099790	Plk2	1.90381	MGI:1337006	Hapln1	0.422924
MGI:1099832	Tln1	1.30515	MGI:106253	D19Bwg1357e	0.679609
MGI:1100518	Smad7	1.27413	MGI:95791	Got1	0.618492
MGI:1100842	Gfra1	2.05313	MGI:1923505	Pcgf5	0.620328
MGI:1100850	Capn6	2.04098	MGI:109331	Nxn	0.714621
MGI:1100874	Plagl1	2.25144	MGI:103267	Eif4ebp1	0.616625
MGI:1101355	Ltbp3	1.59309	MGI:1923402	Utp18	0.645485
MGI:1196625	Fzd1	1.46496	MGI:103222	Zbtb16	0.319289
MGI:1197008	Wisp1	1.37722	MGI:2442191	Dusp4	0.522275
MGI:1197012	Aebp1	1.40183	MGI:1928765	Scube2	0.701555
MGI:1202296	Sorl1	1.28881	MGI:94890	Dhfr	0.631459
MGI:1202715	Tcf21	2.72097	MGI:101816	Msh2	0.674206
MGI:1261422	Naga	1.31229	MGI:88564	Ctsl	0.721594
MGI:1261827	Dnmt3a	1.493	MGI:1916221	Tamm41	0.683619
MGI:1261834	Wnt2b	1.57439	MGI:88026	Ank3	0.580744
MGI:1277098	Ptp4a3	1.24338	MGI:1096574	Car4	0.347319
MGI:1277122	Rcn3	1.70092	MGI:1917708	2610318N02Rik	0.583676
MGI:1277150	Ldlrad4	1.51568	MGI:98181	Rrm2	0.597048
MGI:1277171	Dcx	1.65453	MGI:1338883	Gfpt2	0.699818
MGI:1277173	Arhgef25	1.27752	MGI:2140779	Sdad1	0.606924
MGI:1278332	Bcl6b	1.29196	MGI:106013	Slc16a1	0.526957
MGI:1289196	Rnf213	1.43489	MGI:1341907	Fjx1	0.679981
MGI:1298393	Sh3pxd2a	1.22371	MGI:2448556	Stard8	0.59628
MGI:1313266	Alcam	1.79968	MGI:2385237	Aimp2	0.657701
MGI:1313314	Cldn4	1.34183	MGI:1860763	Eif3i	0.634505
MGI:1314884	Tnfrsf1a	1.40084	MGI:1930150	Popdc2	0.397114
MGI:1315202	Slit3	1.97554	MGI:1346084	Rpp40	0.675092
MGI:1315215	Dhrs3	2.0082	MGI:1351474	Nufip1	0.720811
MGI:1316732	Clca1	1.40316	MGI:103202	Adsl	0.735029
MGI:1321119	Aurkc	1.36289	MGI:88490	Crabp1	0.135595
MGI:1321386	Entpd3	1.54427	MGI:1915223	Mphosph10	0.680756
MGI:1329044	Cldn3	1.48463	MGI:1313286	Eif2b3	0.686136
MGI:1330818	Qsox1	1.7439	MGI:2147931	Nudt10	0.493398
MGI:1333743	Mpeg1	1.28978	MGI:107246	Tinf2	0.731227
MGI:1333854	Gab2	1.24478	MGI:1918019	Nolc1	0.613012
MGI:1333857	Arhgap31	1.26325	MGI:2177570	Tmem47	0.507684
MGI:1334444	Zfpm2	1.75912	MGI:1859683	Rpp30	0.665795
MGI:1336879	Fkbp7	1.59586	MGI:1861727	Dkc1	0.690649
MGI:1337004	Loxl3	1.47798	MGI:1919214	Atad3a	0.67488
MGI:1338010	Hic1	1.94452	MGI:1349448	Cenph	0.629196
MGI:1338031	Spint2	1.62484	MGI:97255	Myh6	0.234825
MGI:1338042	Pcdh10	1.64822	MGI:1917152	Mrto4	0.568959
MGI:1338946	Acvrl1	1.3349	MGI:1277973	Thumpd3	0.693014
MGI:1339365	S1pr3	2.341	MGI:98779	Tnnc1	0.236344
MGI:1339758	Csf1r	1.37452	MGI:1277991	Dach1	0.534693
MGI:1340030	Crlf1	1.41543	MGI:2136882	Wrb	0.626799
MGI:1341188	Ntn3	1.32102	MGI:1916322	Ebna1bp2	0.706202
MGI:1341264	Tpbg	1.55047	MGI:1338073	Cdc45	0.744961
MGI:1341272	Col14a1	1.93088	MGI:2442377	Ipo11	0.67388
MGI:1341847	Hhip	2.33289	MGI:1859353	Mkrn1	0.668367
MGI:1342276	Mfap4	2.02393	MGI:1917274	Mcm10	0.65624
MGI:1344395	Chd3	1.86291	MGI:1347463	Foxd1	0.351661
MGI:1344401	Rnf144a	1.18016	MGI:1916520	Gins1	0.702372
MGI:1344407	Zeb2	1.51365	MGI:107495	Myl7	0.229618
MGI:1344424	Osr1	2.59442	MGI:2684929	Dcaf13	0.69175
MGI:1345277	Ddr2	1.75417	MGI:104790	Smyd1	0.466627
MGI:1346031	Tshz1	1.42486	MGI:2159210	Tiparp	0.630657
MGI:1346086	Aplnr	1.56337	MGI:88476	Cp	0.627656
MGI:1346322	Gpc6	1.65519	MGI:1925644	Ddx52	0.75246
MGI:1346864	Mapk13	1.42254	MGI:1914502	Cap2	0.502827
MGI:1347002	Angptl2	1.23203	MGI:1354721	Slc25a13	0.650201
MGI:1347244	Axl	1.5574	MGI:2448536	Pdap1	0.731954
MGI:1347346	Adamts7	1.27681	MGI:2654144	Ercc6l	0.729887
MGI:1347352	Hunk	1.21818	MGI:1913359	Tspan13	0.682214
MGI:1347469	Foxl1	1.79411	MGI:1919272	Slc35f2	0.61362
MGI:1347470	Foxf1	3.41705	MGI:1328306	Orc2	0.663968
MGI:1347472	Foxa1	1.68379	MGI:1889272	Cadm1	0.569161
MGI:1347479	Foxf2	1.56711	MGI:1860611	Pdlim1	0.678241
MGI:1347520	Ror1	1.9374	MGI:1354164	Hspa14	0.690282
MGI:1349165	Sdc2	2.02939	MGI:1923607	Trmt5	0.716797
MGI:1349216	Abcd3	1.44123	MGI:1298387	Fhl1	0.500742
MGI:1349457	Serinc3	1.36266	MGI:2443732	Dna2	0.597501
MGI:1349645	Islr	2.1552	MGI:1919650	Pinx1	0.681964
MGI:1350931	Tcirg1	1.36766	MGI:1277172	Ddx56	0.718595
MGI:1351326	Nrk	3.36846	MGI:1351645	Prmt5	0.735155
MGI:1352474	Tnfrsf19	1.60761	MGI:1918039	Kynu	0.754441
MGI:1353471	Airn	1.58179	MGI:103288	Polr1c	0.754264
MGI:1353511	Sspn	1.24748	MGI:1914931	Mrpl18	0.711196
MGI:1353644	Zfp503	1.5528	MGI:1345633	Mars	0.705224
MGI:1354184	Nox4	1.19202	MGI:97268	Myl3	0.494266
MGI:1354381	Tmprss2	1.34513	MGI:97616	Plcg2	0.682336
MGI:1858224	Chst3	1.21135	MGI:1914701	Pkp2	0.573049
MGI:1858430	Scarf2	1.38277	MGI:1915186	Wdr55	0.680616
MGI:1858497	Igdcc4	1.46454	MGI:2448526	Gmps	0.738009
MGI:1859284	Cldn6	1.71646	MGI:3584032	Lin28b	0.226641
MGI:1859388	Dll4	1.16294	MGI:98775	Tmod1	0.50166
MGI:1859606	Wdr45	1.25442	MGI:1889383	Ap1s2	0.635247
MGI:1859778	Hif3a	1.51276	MGI:88491	Crabp2	0.236782
MGI:1860118	Sema3d	1.89137	MGI:2442040	G3bp2	0.730849
MGI:1860604	Gucy1b3	2.47686	MGI:2442934	A730017C20Rik	0.52641
MGI:1860764	Pde3a	1.33842	MGI:1929619	Nxt1	0.737919
MGI:1888499	Cxcl13	3.09396	MGI:88516	Cryab	0.566032
MGI:1888712	Ppbp	2.3315	MGI:108403	Polr1d	0.677221
MGI:1889205	Cpq	1.71817	MGI:1330824	Csrp3	0.532814
MGI:1890081	Foxo3	1.29893	MGI:95713	Gja1	0.701038
MGI:1890127	Plxnc1	1.34134	MGI:96759	Ldha	0.610795
MGI:1890596	Evc	1.2022	MGI:1354713	Acsl4	0.643586
MGI:1891209	Efemp2	1.59695	MGI:1916966	Trip13	0.755466
MGI:1891250	Gprc5a	1.43314	MGI:3617840	Cpa2	0.527282
MGI:1891740	Dact1	1.98077	MGI:106034	Six4	0.640844
MGI:1913122	Tmem45a	1.93307	MGI:98364	Sox2	0.332535
MGI:1913308	Tmem176a	1.70477	MGI:1917535	Rpf1	0.712923
MGI:1913310	Cystm1	1.21339	MGI:1917297	Trnt1	0.644746
MGI:1913425	Mustn1	1.26555	MGI:2385825	Plekhb2	0.69555
MGI:1913869	Atat1	1.22237	MGI:88070	Arg1	0.404438
MGI:1914004	Foxp1	1.53858	MGI:95755	Slc2a1	0.366601
MGI:1914057	Tmtc2	2.12846	MGI:1347355	Slc7a11	0.728277
MGI:1914243	Smarcd3	1.39288	MGI:1914179	Asf1b	0.704399
MGI:1914283	2610005L07Rik	2.25268	MGI:894326	Atp6v1e1	0.767468
MGI:1914285	Dnajb4	1.50692	MGI:96968	Mest	0.737442
MGI:1914291	Oxct1	1.83845	MGI:2387585	Zfp280c	0.621497
MGI:1914311	Dzip1	1.37558	MGI:1277218	Rpap3	0.720735
MGI:1914448	Spats2l	1.57989	MGI:1860295	Ftsj3	0.682984
MGI:1914698	Plxdc2	1.92187	MGI:1922589	Mphosph8	0.666106
MGI:1914738	Calcoco1	1.25117	MGI:2675306	Zfp930	0.610245
MGI:1914789	Dock6	1.31748	MGI:1858419	Bysl	0.721568
MGI:1915044	Shisa5	1.34301	MGI:892032	Frzb	0.430407
MGI:1915213	Npc2	1.38584	MGI:1096366	Psme3	0.768253
MGI:1915277	Tmem178	1.23644	MGI:1921446	Ttc27	0.68384
MGI:1915372	Nkain4	2.58777	MGI:107183	Cct8	0.7767
MGI:1915776	Gpr155	1.20774	MGI:2385175	Msto1	0.738128
MGI:1915932	Slc44a2	1.48691	MGI:1097717	Ankrd1	0.32219
MGI:1916318	1810011O10Rik	1.4922	MGI:1916372	Ptgr2	0.769689
MGI:1916348	Tmem176b	2.69707	MGI:1196260	Hn1l	0.772601
MGI:1916648	Cdhr4	1.31185	MGI:107422	Hspa4l	0.600148
MGI:1916730	Ttc9	1.30787	MGI:99186	Zfp41	0.670719
MGI:1916788	Antxr1	1.47636	MGI:1355321	Chek2	0.689984
MGI:1916840	Gpx8	1.38967	MGI:1310002	Fmo1	0.602331
MGI:1916882	Arhgef12	1.21235	MGI:1914223	Mrps18b	0.704672
MGI:1916905	Cd164l2	1.21315	MGI:2443386	Dnajc11	0.724711
MGI:1916925	Pxdn	1.26918	MGI:3704210	Gm14494	0.566673
MGI:1916960	Arap1	1.59144	MGI:1923380	Las1l	0.67209
MGI:1917673	Tspan15	1.3881	MGI:1353651	Gnl3	0.652631
MGI:1917695	Cd248	1.33512	MGI:95655	Gas1	0.707851
MGI:1917705	2610203C20Rik	1.71318	MGI:1913275	Rcl1	0.710749
MGI:1917814	Fam213a	1.47168	MGI:108395	Vnn1	0.681411
MGI:1918001	6330403K07Rik	1.90279	MGI:2384802	Eif2b1	0.778418
MGI:1918046	Zdhhc1	1.39001	MGI:104597	Tnnt2	0.285168
MGI:1918195	Mmrn1	1.63793	MGI:87905	Actc1	0.168858
MGI:1918711	Ptk7	1.42355	MGI:1913878	Thg1l	0.719418
MGI:1918731	Alpk1	1.24986	MGI:1328337	Orc1	0.702224
MGI:1918781	Piezo2	1.61952	MGI:1917473	Nars	0.747247
MGI:1918842	Pogk	1.22919	MGI:1913325	Chchd3	0.740584
MGI:1919030	Isyna1	1.31529	MGI:3583960	D030056L22Rik	0.628432
MGI:1919168	Zcchc24	1.33649	MGI:1888496	Tbx20	0.445924
MGI:1919196	Endod1	1.21198	MGI:88350	Cdc25c	0.705107
MGI:1919539	Malat1	1.901	MGI:1929938	Perp	0.672044
MGI:1919643	Faim2	1.27746	MGI:1915958	Rabl2	0.76289
MGI:1919762	Tmem173	1.61529	MGI:1923389	Haus6	0.725153
MGI:1919950	Zfp618	1.36281	MGI:1924841	Ddx10	0.707791
MGI:1920048	Lhfp	1.31771	MGI:106662	Ly75	0.63241
MGI:1920423	Pcdh18	1.72073	MGI:1920421	Trmt10a	0.719883
MGI:1920431	Nfatc4	1.2632	MGI:1339968	Cth	0.682304
MGI:1920480	Bmper	1.79636	MGI:1890396	Suv39h2	0.612376
MGI:1921356	Dcaf6	1.18155	MGI:1923258	Nabp1	0.603497
MGI:1921394	Robo4	1.37295	MGI:1919979	Cdc42se2	0.729824
MGI:1921395	F13a1	1.64794	MGI:1915092	Nop9	0.715636
MGI:1921642	Specc1l	1.16495	MGI:1913526	1810009A15Rik	0.713182
MGI:1922394	Pdzd2	1.4815	MGI:1344418	Cib1	0.746263
MGI:1922667	Rspo2	2.68515	MGI:2384725	Zfp553	0.744932
MGI:1923029	4930402H24Rik	1.24765	MGI:2148019	Jade3	0.717862
MGI:1923457	Tmem98	1.46229	MGI:1861676	Nme6	0.735806
MGI:1923513	Gstk1	1.50161	MGI:97527	Pdgfa	0.727337
MGI:1923816	Fam101b	1.43914	MGI:1918180	Nol8	0.661098
MGI:1924151	Jade2	1.21033	MGI:1923847	Gins4	0.779988
MGI:1924238	Rdh10	1.46647	MGI:1196288	Eif6	0.70822
MGI:1924270	Atl3	1.54946	MGI:2444479	Thumpd1	0.736054
MGI:1924470	Tmem200a	1.64611	MGI:96916	Maob	0.587434
MGI:1924546	Fam162b	1.44266	MGI:96396	Id1	0.699634
MGI:1924661	Esrp2	1.36177	MGI:1926387	Cdon	0.555405
MGI:1924967	6030408B16Rik	1.68667	MGI:1913560	Dpy30	0.750468
MGI:1925139	Lbh	1.39332	MGI:1924880	Prdm8	0.725903
MGI:1925144	Prickle2	1.27309	MGI:1346320	Taf10	0.628804
MGI:1925584	Cdk19	1.75717	MGI:1915743	Ndufaf4	0.689704
MGI:1925668	Pgm5	1.81459	MGI:99470	Dnajc2	0.662482
MGI:1925810	Gpr124	1.26196	MGI:2442060	Rassf2	0.742081
MGI:1925911	C1qtnf7	2.14233	MGI:1913304	Cndp2	0.758161
MGI:1926063	Nckap1l	1.23478	MGI:1926145	Pus7l	0.787432
MGI:1926142	Crispld2	1.51256	MGI:3038613	Rragb	0.408348
MGI:1926189	Emilin1	1.49042	MGI:1929878	Smoc1	0.517264
MGI:1926283	Tmem8	1.18698	MGI:107186	Cct2	0.800801
MGI:1926562	Gucy1a3	3.85093	MGI:1919804	Utp14a	0.686894
MGI:1927070	Dusp10	1.60308	MGI:104902	Gpc4	0.597728
MGI:1927238	Mllt1	1.22352	MGI:95321	Emb	0.333853
MGI:1927244	Ralb	1.65572	MGI:1914669	3632451O06Rik	0.558699
MGI:1927616	Trps1	1.37005	MGI:1860283	Ubqln2	0.683886
MGI:1927655	Ggcx	1.31933	MGI:1342292	Hspa4	0.790821
MGI:1928478	Brinp1	1.39809	MGI:107634	Larp7	0.702898
MGI:1928481	Lgals8	1.33327	MGI:1316714	Cox7a1	0.779406
MGI:1928482	Mbnl1	1.49679	MGI:95298	Eif1a	0.709593
MGI:1928849	Svep1	1.70815	MGI:1202907	Csrp2	0.694012
MGI:1929096	Thsd1	1.19885	MGI:104621	Alx1	0.547603
MGI:1929209	Cldn18	2.20574	MGI:95309	Eif5	0.709022
MGI:1929474	Cyp2d22	1.24439	MGI:1917819	Wdr36	0.747341
MGI:1929600	Pmepa1	1.63394	MGI:1890496	Elac2	0.708851
MGI:1929881	Smoc2	1.96387	MGI:2385255	Mrps35	0.749894
MGI:1931054	Slc43a3	1.58679	MGI:1913808	Lars	0.710456
MGI:1931144	Parva	1.37187	MGI:1913695	Cyc1	0.733774
MGI:1933157	Pdzrn3	1.3732	MGI:1338017	Bex2	0.575773
MGI:1933966	Mcam	1.4283	MGI:1194494	Hdgf	0.769959
MGI:1933973	Rbfox2	1.16677	MGI:1923173	Dnttip2	0.729261
MGI:2136752	Pcdhb16	1.27342	MGI:1917493	Wdr61	0.774981
MGI:2137495	Myocd	1.46838	MGI:2389136	Emilin2	0.597981
MGI:2137648	Ifi30	1.49942	MGI:1921717	Pus10	0.760981
MGI:2137679	Sfxn3	1.31463	MGI:1194505	C1qbp	0.723742
MGI:2138628	Obsl1	1.26832	MGI:894697	Rad54l	0.684288
MGI:2138828	Eps8l2	1.2217	MGI:96605	Itga6	0.665688
MGI:2140882	Upk3b	1.78659	MGI:1913915	Msantd3	0.723065
MGI:2142149	Ano1	1.50958	MGI:2442264	Idi1	0.637921
MGI:2143322	AW551984	2.14308	MGI:1347345	Homer1	0.660158
MGI:2143537	Tmem26	1.65372	MGI:1917178	Apitd1	0.701513
MGI:2145597	Mbnl2	1.61364	MGI:106295	Tomm70a	0.713088
MGI:2146021	Mal2	3.30374	MGI:2147627	Yars	0.792879
MGI:2147003	Arhgap28	1.55287	MGI:98239	Scd1	0.455051
MGI:2147043	Rmdn2	1.22295	MGI:1916487	Gtpbp4	0.737931
MGI:2147319	Svil	1.54094	MGI:1929214	Ap3m2	0.750602
MGI:2147570	Marveld1	1.52279	MGI:104912	Sf3a2	0.75371
MGI:2147658	Afap1l2	1.23773	MGI:1917329	Golm1	0.580279
MGI:2147716	Slc16a12	1.52993	MGI:97004	Mme	0.552306
MGI:2147731	Slc25a45	1.18725	MGI:1918995	Cul2	0.767751
MGI:2148066	Slc38a5	2.11201	MGI:104810	Plaa	0.761698
MGI:2148202	Ces1d	1.59004	MGI:2155600	Myh7	0.290333
MGI:2148705	Foxp2	2.74157	MGI:1913842	Stoml2	0.766266
MGI:2149821	Hsd17b11	1.30406	MGI:1338889	Uhrf1	0.759281
MGI:2154244	Plxnd1	1.387	MGI:99655	Prdm1	0.710181
MGI:2175912	Arid5b	1.79824	MGI:1860494	Ddx21	0.630425
MGI:2177191	Bspry	1.23012	MGI:103007	Epb4.1l4a	0.67556
MGI:2177268	Ppp1r3b	1.62389	MGI:2446132	Bms1	0.73104
MGI:2183102	Sardh	1.61039	MGI:1915147	Rnmt	0.674155
MGI:2385228	Tmem119	1.27273	MGI:99690	Pola2	0.769842
MGI:2385297	Tpcn2	1.21132	MGI:105102	Gpx3	0.661664
MGI:2385368	Fras1	1.94386	MGI:96013	Hat1	0.657453
MGI:2385920	Dip2a	1.19944	MGI:1858313	Uba2	0.79179
MGI:2387586	Tenc1	1.45218	MGI:105088	Ntn1	0.62461
MGI:2388640	BC005764	1.26317	MGI:1921353	Nebl	0.494166
MGI:2389142	Emilin3	1.56262	MGI:1913738	Fam136a	0.628931
MGI:2441950	Lphn3	1.36738	MGI:106038	Lrrn1	0.370251
MGI:2442009	E030024N20Rik	1.58988	MGI:2385076	Haus1	0.768433
MGI:2442111	Ppm1k	1.23988	MGI:1353655	Usp25	0.671101
MGI:2442416	Itpripl2	1.39639	MGI:2685630	Fndc3c1	0.366902
MGI:2442485	Myo5c	1.45996	MGI:1196274	Cdca8	0.652798
MGI:2442695	Creb3l2	1.60319	MGI:1096573	Cirh1a	0.738962
MGI:2442805	C920025E04Rik	1.30395	MGI:3606159	Tmem243	0.672289
MGI:2442819	Tshz3	1.49872	MGI:1343178	Apobec2	0.676915
MGI:2442849	Pcdh11x	1.60595	MGI:1928898	Usp14	0.776546
MGI:2442910	Fam129b	1.31855	MGI:104841	Cpox	0.612141
MGI:2443012	Tns3	1.44248	MGI:102657	Cdc34	0.668729
MGI:2443160	Pag1	1.2944	MGI:107899	Cd36	0.57527
MGI:2443198	Slitrk6	2.08072	MGI:4845848	AK010878	0.652155
MGI:2443248	Exph5	1.29115	MGI:1351328	Dbf4	0.725338
MGI:2443349	Parm1	1.54209	MGI:1916513	Rfc3	0.750542
MGI:2443369	Fgd5	1.16111	MGI:1920460	Nup54	0.755688
MGI:2443472	Atf7	1.22047	MGI:2385884	Ddx27	0.778136
MGI:2443629	9930013L23Rik	1.39384	MGI:1913305	0610009D07Rik	0.710699
MGI:2444418	Scara3	1.26581	MGI:1351657	Abcf2	0.770089
MGI:2444465	Frem2	1.75951	MGI:1926966	Eif3c	0.810385
MGI:2444477	Rbms3	1.94725	MGI:1913659	Rsl1d1	0.724944
MGI:2444815	Samd5	1.50719	MGI:1341800	Hey1	0.677957
MGI:2445179	Tmem184b	1.24855	MGI:105084	Satb1	0.608483
MGI:2449112	Adamts10	1.5293	MGI:1098233	Impact	0.764064
MGI:2449569	Adamts15	1.43276	MGI:108440	Amot	0.637632
MGI:2651499	Pde5a	3.68474	MGI:1916892	Mlip	0.662969
MGI:2652839	Zfp362	1.27212	MGI:2137215	Mrpl11	0.7007
MGI:2652872	Nynrin	1.39162	MGI:1355274	Uchl3	0.685885
MGI:2665139	Rerg	1.88508	MGI:3646377	Gm5529	0.69342
MGI:2669035	Tmc4	1.22528	MGI:1926237	Mrps30	0.773478
MGI:2673002	Arhgef17	1.34196	MGI:1925255	Rrn3	0.767446
MGI:2676830	Mir145	1.27139	MGI:1924836	Mthfd1l	0.640245
MGI:2676882	Mir207	2.01842	MGI:95654	Gart	0.710115
MGI:2676898	Mir23b	1.35866	MGI:1916827	Fastkd3	0.761365
MGI:2676903	Mir27b	1.50121	MGI:1351477	Cars	0.747073
MGI:2679264	Olfml1	1.46642	MGI:1289326	Gpn3	0.762583
MGI:2682634	Enpp4	1.19623	MGI:109192	Actn2	0.444954
MGI:2684924	Pcdh17	1.46103	MGI:1913292	Sostdc1	0.578255
MGI:2685011	Dchs1	1.44004	MGI:1349449	Galnt7	0.644754
MGI:2685104	Akap5	1.78584	MGI:1913961	Sbds	0.779016
MGI:2685174	9430020K01Rik	1.38413	MGI:1925622	Snrnp25	0.707168
MGI:2685214	Prrg3	1.21619	MGI:1915122	Nsmce4a	0.729161
MGI:2685720	Acss3	1.82378	MGI:1923799	Cecr2	0.463521
MGI:3028499	Adamtsl3	1.37537	MGI:2445193	Utp6	0.775931
MGI:3031206	Olfr1372-ps1	2.21184	MGI:1926209	Dek	0.783673
MGI:3036262	Plcl1	1.29298	MGI:2146851	Tfb1m	0.692217
MGI:3039590	Tmtc1	1.25577	MGI:98352	Sod2	0.72069
MGI:3043381	Kank4	1.55662	MGI:103197	Mcm5	0.714378
MGI:3045256	Fat4	1.68205	MGI:104815	Ier2	0.747719
MGI:3045258	Stard9	1.25497	MGI:96622	Itpa	0.729022
MGI:3604353	B130024G19Rik	1.59692	MGI:95281	Ect2	0.734886
MGI:3612184	Ccdc8	1.32814	MGI:107470	Lyar	0.656778
MGI:3629889	Mir680-3	1.51457	MGI:1100512	Mre11a	0.796288
MGI:3641675	Gm10115	1.69376	MGI:1913906	Eef1d	0.757747
MGI:3643092	Neurl1b	1.13725	MGI:1917851	Ecd	0.783543
MGI:3645057	Rbm46	3.47125	MGI:1913872	Ubr7	0.762787
MGI:3645829	Gm7125	1.20208	MGI:1333804	Vbp1	0.727334
MGI:3646284	Ighv1-12	1.82552	MGI:108063	Siah1b	0.775405
MGI:3649608	Trav8-1	1.25164	MGI:1924386	Cep78	0.722044
MGI:3650121	Trav8d-1	1.37139	MGI:1920924	Wdr75	0.759847
MGI:3650315	Gm11951	1.49987	MGI:894678	Aurka	0.737083
MGI:3651543	Susd1	1.37364	MGI:1917188	Scrn1	0.55256
MGI:3698178	Fam174b	1.67076	MGI:1328362	Blm	0.712994
MGI:3702532	Lce1j	1.27383	MGI:1931051	Noc2l	0.728836
MGI:3704303	Gm10013	1.97046	MGI:3051596	Znhit3	0.71
MGI:3781628	Mpc1-ps	2.04405	MGI:2146423	Ccdc58	0.666525
MGI:3782293	Gm4117	2.44559	MGI:1916749	Tsr2	0.779671
MGI:3842428	Pisd-ps1	1.47332	MGI:1914933	Pbdc1	0.73429
MGI:4439575	Trbj1-6	1.57132	MGI:87979	Ak4	0.644799
MGI:4439854	Ighv6-3	1.95869	MGI:1916344	Tmem160	0.74105
MGI:4937113	Traj54	1.71435	MGI:1916066	Ppil1	0.742169
MGI:5452795	Gm23018	1.76969	MGI:1917162	Nup43	0.699066
MGI:5453033	Gm23256	1.81857	MGI:99462	Pigf	0.700479
MGI:5453436	Gm23659	1.51036	MGI:1915326	Dnajc9	0.71637
MGI:5453913	Gm24136	2.24603	MGI:1919912	Dis3	0.723084
MGI:5454715	Gm24938	1.6435	MGI:2443143	Wdr3	0.712483
MGI:87961	Agrn	1.32581	MGI:1918970	Osbpl3	0.752251
MGI:88059	App	1.32553	MGI:107821	Has2	0.464364
MGI:88111	Atp2b4	1.39136	MGI:1929507	Arl6ip6	0.693611
MGI:88158	Bgn	2.43949	MGI:1914152	Mtap	0.694088
MGI:88176	Bmp1	1.59347	MGI:1917816	Abhd17b	0.700014
MGI:88180	Bmp4	1.2988	MGI:2442544	Dars	0.706448
MGI:88250	Cald1	1.6053	MGI:106924	Melk	0.761594
MGI:88255	Anxa6	2.38324	MGI:1932610	Noc3l	0.709777
MGI:88336	Cd40	1.13993	MGI:2183441	Psat1	0.60324
MGI:88397	Chrm2	1.6164	MGI:95286	Eed	0.686028
MGI:88449	Col15a1	1.47293	MGI:2445153	Clspn	0.733497
MGI:88453	Col3a1	1.92842	MGI:1933181	Eif3d	0.76333
MGI:88457	Col5a1	1.31314	MGI:1350929	Asns	0.64152
MGI:88458	Col5a2	1.77087	MGI:1916884	Clybl	0.704454
MGI:88459	Col6a1	1.55903	MGI:1316717	Ifrd1	0.718763
MGI:88467	Col1a1	2.57904	MGI:3036269	Trim55	0.60132
MGI:88468	Col1a2	2.67511	MGI:1347354	Homer2	0.774977
MGI:893588	Cirbp	1.24552	MGI:1934666	Crispld1	0.616611
MGI:894659	Hbp1	1.41647	MGI:1914238	Lap3	0.755674
MGI:894670	Ldb2	1.43652	MGI:96788	Lifr	0.714798
MGI:894688	Serpinb6b	1.62082	MGI:1916145	Rasl11a	0.722775
MGI:894806	Mylk	1.66185	MGI:1914736	Polr3g	0.677432
MGI:94876	Ddc	1.34489	MGI:1913640	Slmo2	0.772468
MGI:95276	Epha7	1.59268	MGI:2384879	Prmt7	0.760501
MGI:95294	Egfr	2.20292	MGI:99605	Cntfr	0.767513
MGI:95411	Erbb3	1.44585	MGI:97272	Myl2	0.350888
MGI:95455	Ets1	1.55882	MGI:95537	Ctgf	0.724461
MGI:95456	Ets2	1.68922	MGI:1929004	Stk4	0.76594
MGI:95487	Fbln1	1.23305	MGI:97874	Rb1	0.618102
MGI:95489	Fbn1	2.0379	MGI:1861601	Cpsf2	0.783463
MGI:95490	Fbn2	1.56721	MGI:1913618	Rtca	0.753399
MGI:95523	Fgfr2	1.23641	MGI:1098258	Kif15	0.738816
MGI:95556	Flna	1.36026	MGI:1313312	Khdrbs3	0.617496
MGI:95557	Flnc	1.38288	MGI:1861453	Actl6a	0.7821
MGI:95708	Ghr	2.28781	MGI:95586	Fst	0.582481
MGI:95727	Gli1	1.41048	MGI:1913830	Esf1	0.728982
MGI:95769	Gna14	1.4855	MGI:1309468	Casq1	0.485259
MGI:95806	Aes	1.79835	MGI:1919765	Wdr43	0.733901
MGI:95810	Gria3	1.8834	MGI:1920916	Thoc3	0.770819
MGI:95824	Nr3c1	1.81298	MGI:3646700	Amt	0.71421
MGI:95832	Grn	1.48277	MGI:101789	Lig1	0.826184
MGI:95851	Gsn	1.53602	MGI:1913447	Cks2	0.58773
MGI:95891	H19	1.3571	MGI:1289171	Mettl2	0.793098
MGI:96109	Hlx	1.54159	MGI:1913864	Gpatch4	0.708133
MGI:96177	Hoxa5	2.7002	MGI:109386	Cebpz	0.709898
MGI:96183	Hoxb2	1.25771	MGI:1915546	Smu1	0.777444
MGI:96184	Hoxb3	1.66099	MGI:1919230	Utp3	0.712583
MGI:96185	Hoxb4	1.65731	MGI:2444310	Fsd2	0.643274
MGI:96186	Hoxb5	1.99395	MGI:1098604	Rragd	0.449906
MGI:96187	Hoxb6	1.38162	MGI:1919218	Wdr73	0.748347
MGI:96392	Icam1	1.31008	MGI:1913284	Psmd14	0.746581
MGI:96432	Igf1	1.7841	MGI:1919972	Fam98a	0.699217
MGI:96434	Igf2	1.49012	MGI:95908	H2-Ke2	0.754014
MGI:96435	Igf2r	1.52831	MGI:2442563	Naa25	0.710063
MGI:96440	Igfbp5	2.02355	MGI:104689	Cct4	0.738977
MGI:96600	Itga2	1.40663	MGI:109233	Kif22	0.727266
MGI:96608	Itgav	1.24873	MGI:99526	Ddx19a	0.753027
MGI:96610	Itgb1	1.2765	MGI:98958	Wnt5a	0.513275
MGI:96628	Jak1	1.2486	MGI:1926185	Saal1	0.777688
MGI:96646	Jun	1.39454	MGI:2442144	Taf5	0.777616
MGI:96650	Jup	1.20461	MGI:2385133	Exosc2	0.786113
MGI:96704	Krt7	1.50401	MGI:1859866	Cdc20	0.67778
MGI:96743	Lamb1	1.49636	MGI:1919583	Palld	0.716568
MGI:96817	Lox	2.59172	MGI:1914309	Ola1	0.699663
MGI:96832	Lsp1	2.31022	MGI:1913989	Rcc1	0.725365
MGI:96930	Mcc	1.30766	MGI:1915465	Fam98b	0.745819
MGI:96976	Mgp	1.84155	MGI:1916119	Imp3	0.732892
MGI:97008	Mmp11	1.50644	MGI:107376	Msi1	0.537514
MGI:97009	Mmp2	1.83639	MGI:1919862	2700029M09Rik	0.76189
MGI:97054	Mov10	2.01885	MGI:104861	Bcat1	0.498229
MGI:97283	Ncf1	1.16919	MGI:1914399	Nkain1	0.691371
MGI:97302	Nedd9	1.70902	MGI:1928144	Plekha2	0.696262
MGI:97373	Npr3	1.80591	MGI:104900	Nup88	0.80826
MGI:97394	Oat	1.39427	MGI:1270839	Cacybp	0.715867
MGI:97495	Pbx1	1.48927	MGI:88177	Bmp2	0.744375
MGI:97496	Pbx3	1.35246	MGI:1923596	Rars2	0.779119
MGI:97530	Pdgfra	1.55158	MGI:98864	Ttn	0.438427
MGI:97531	Pdgfrb	1.69705	MGI:97838	Eprs	0.787708
MGI:97537	Pecam1	1.45766	MGI:3646681	Gm9027	0.644878
MGI:97598	Prkcd	1.27544	MGI:2152414	Ipo7	0.759481
MGI:97610	Plat	1.51392	MGI:1913586	Cenpp	0.727312
MGI:97613	Plcb1	1.33473	MGI:1916956	Lrr1	0.738608
MGI:97751	Ppic	1.63964	MGI:98961	Wnt7a	0.697307
MGI:97769	Prnp	1.39019	MGI:1914247	Psmd12	0.793045
MGI:97773	Prh1	1.32027	MGI:107816	Pfkfb1	0.817387
MGI:97812	Ptprd	1.74664	MGI:2384561	Nae1	0.719357
MGI:97815	Ptprs	1.33917	MGI:1316728	Gspt1	0.79071
MGI:98330	Snai1	1.35736	MGI:87994	Aldoa	0.601932
MGI:98366	Sox4	1.33529	MGI:2443487	Trmt61a	0.673963
MGI:98373	Sparc	1.83948	MGI:1859547	Syt11	0.447541
MGI:98494	Tbx2	2.91699	MGI:1924434	Fam64a	0.755652
MGI:98495	Tbx3	1.80909	MGI:1916231	Snrpa1	0.674438
MGI:98497	Tbxas1	1.15656	MGI:1922312	Sf3a3	0.766374
MGI:98725	Tgfb1	1.26661	MGI:2140103	Nmd3	0.739167
MGI:98726	Tgfb2	2.04149	MGI:1913371	Chchd1	0.673176
MGI:98729	Tgfbr2	1.48369	MGI:1914437	Zmynd19	0.754046
MGI:98736	Thbd	2.28706	MGI:104990	Gclc	0.69622
MGI:98737	Thbs1	3.21264	MGI:95639	Gap43	0.521811
MGI:98738	Thbs2	2.09423	MGI:1918686	Flrt3	0.454414
MGI:98742	Thra	1.56667	MGI:96245	Hspa9	0.790029
MGI:98752	Timp1	1.24084	MGI:1919942	Hnrnpll	0.830367
MGI:98753	Timp2	1.50714	MGI:1924574	Sorbs2	0.706973
MGI:98754	Timp3	1.55299	MGI:1333112	Ran	0.808766
MGI:98954	Wnt2	2.11953	MGI:2384309	Polr2h	0.618029
MGI:98962	Wnt7b	1.6759	MGI:1923502	Atp6v0e2	0.727996
MGI:99204	Zfp57	1.42186	MGI:1916327	Psmd11	0.689191
MGI:99217	Cdh11	1.81469	MGI:1913775	Timm50	0.785498
MGI:99444	Nrep	2.01653	MGI:1316678	Rad1	0.777933
MGI:99478	Cckar	1.99328	MGI:1923547	Kti12	0.789092
MGI:99559	Mfap2	1.84147	MGI:1915191	Rps27l	0.647621
MGI:99607	Abca1	1.75128	MGI:1926227	Nup160	0.740266
MGI:99612	Epha3	2.81856	MGI:2387603	Ahsa1	0.790508
MGI:99828	Slc7a2	1.33472	MGI:1918427	Asun	0.763723
MGI:99844	Gem	1.3211	MGI:1202390	Igdcc3	0.29484
MGI:99906	Tie1	1.31842	MGI:1914297	Rars	0.799779
MGI:99909	Lama3	1.82982	MGI:88105	Atp1a1	0.778221
MGI:99912	Lama2	1.83814	MGI:1914269	Actr6	0.721702
MGI:99914	Lamc1	1.67321	MGI:1921294	Ttf2	0.719138
MGI:99916	Lamb2	1.31475	MGI:1913670	Polr2e	0.768453
MGI:99959	Tgfbi	2.45788	MGI:1929511	Ndufa1	0.747283
			MGI:98935	Vldlr	0.748839
			MGI:96738	l7Rn6	0.76636
			MGI:1344341	Car14	0.458842
			MGI:1931441	Qtrt1	0.764597
			MGI:106065	Ppm1g	0.742557
			MGI:1924082	Hyls1	0.788614
			MGI:101785	Mybl2	0.696936
			MGI:1927241	Wdr12	0.639405
			MGI:1913833	Exosc1	0.73385
			MGI:1913835	Snrnp40	0.79357
			MGI:1914489	Rpf2	0.777658
			MGI:1915896	Nadk2	0.788723
			MGI:95275	Ebf1	0.566587
			MGI:95395	Eno3	0.516481
			MGI:1922546	Fgfr1op	0.741976
			MGI:2442524	Heatr1	0.667676
			MGI:1929129	Sap30	0.638786
			MGI:1346325	Gadd45g	0.697294
			MGI:1891833	Pfkp	0.70896
			MGI:2183438	Ell2	0.769264
			MGI:1343095	Emc8	0.808504
			MGI:1919405	Cenpn	0.732093
			MGI:2147427	Wdr74	0.707303
			MGI:2655574	Ostm1	0.763118
			MGI:1919085	Lancl2	0.783938
			MGI:2149712	Greb1	0.54023
			MGI:2137410	Peo1	0.749765
			MGI:96112	Hmbs	0.772746
			MGI:1930171	Pvrl3	0.758111
			MGI:1914869	Nob1	0.757193
			MGI:1925836	Srbd1	0.803851
			MGI:109638	Clns1a	0.748764
			MGI:101783	Plk4	0.786475
			MGI:1277103	Nudcd2	0.726146
			MGI:1917436	Fam162a	0.753775
			MGI:2444491	Heatr3	0.791717
			MGI:106054	Psmc1	0.780334
			MGI:1858304	Ctps	0.751881
			MGI:97712	Prrx1	0.401871
			MGI:1929475	Irak1bp1	0.763343
			MGI:1351500	Nup62	0.795784
			MGI:1337060	Ap3s2	0.764637
			MGI:1915199	Nifk	0.74023
			MGI:1100887	Elavl2	0.612778
			MGI:1916428	Snx5	0.733171
			MGI:1925947	Pus7	0.708169
			MGI:1347044	Orc5	0.757084
			MGI:108087	Hars	0.807618
			MGI:1277214	2016-09-11	0.729459
			MGI:1349414	Cops4	0.795248
			MGI:1919822	Spats2	0.773475
			MGI:1352755	Gtse1	0.791844
			MGI:1860486	Tdp2	0.778175
			MGI:1915013	Prpsap1	0.814718
			MGI:1355328	Nasp	0.718099
			MGI:2142116	Psip1	0.677586
			MGI:2446113	Tmem194	0.73839
			MGI:1343297	Drg1	0.803611
			MGI:1860078	Txnl1	0.809914
			MGI:1346035	Farsb	0.816357
			MGI:109384	Atf3	0.811573
			MGI:95757	Slc2a3	0.273598
			MGI:2444314	Fat3	0.645527
			MGI:109130	Stip1	0.783438
			MGI:1914453	Nde1	0.781575
			MGI:1913853	Gemin2	0.806063
			MGI:109341	Eya2	0.801456
			MGI:1919964	Nup37	0.734792
			MGI:2386251	Eif3l	0.795492
			MGI:1920949	Ppp2r1b	0.703885
			MGI:1927340	Mpp6	0.733292
			MGI:2444748	Chd7	0.453635
			MGI:1100886	Prom1	0.6679
			MGI:3649942	Gm13202	0.640073
			MGI:1344313	Zeb1	0.697273
			MGI:1914735	Pwp1	0.785678
			MGI:2140843	Noc4l	0.728689
			MGI:1100863	Kpna3	0.782557
			MGI:1347466	Foxc1	0.567051
			MGI:1914346	Mmachc	0.776313
			MGI:1341430	Myom1	0.54552
			MGI:2681000	Rwdd4a	0.807261
			MGI:1929500	Arl6ip4	0.797864
			MGI:1917143	Selrc1	0.774419
			MGI:1859854	Rcor2	0.532208
			MGI:2387633	Haus3	0.720903
			MGI:3642381	Gm10269	0.622968
			MGI:1924971	Mrps5	0.805736
			MGI:1923512	Pfdn4	0.643547
			MGI:1914304	Paics	0.797274
			MGI:1860374	Mad2l1	0.713358
			MGI:2670995	Trp53i11	0.677567
			MGI:1346051	Dut	0.671609
			MGI:1917715	Wdr77	0.759768
			MGI:2179061	Plxna4	0.741185
			MGI:106209	Hells	0.688288
			MGI:1920895	Ddx46	0.780882
			MGI:1914879	Spc24	0.766953
			MGI:1277220	Ccdc86	0.777787
			MGI:1917497	Psmd1	0.8022
			MGI:1918291	Pcgf6	0.670974
			MGI:1915783	Mphosph6	0.727795
			MGI:2443388	Kdm7a	0.634273
			MGI:108048	Smyd5	0.731837
			MGI:1313302	Cenpf	0.738614
			MGI:1913393	Eef1e1	0.727104
			MGI:1352745	Fscn1	0.722691
			MGI:1890410	Acss2	0.78078
			MGI:1921291	4632434I11Rik	0.722616
			MGI:96269	Ranbp1	0.818975
			MGI:1923195	Tmem56	0.772476
			MGI:2139746	Ankrd13c	0.720015
			MGI:98346	Snrpe	0.632203
			MGI:1916238	Prpf31	0.794648
			MGI:2677480	Thoc6	0.793573
			MGI:894278	Bche	0.68937
			MGI:1913892	Ctnnbl1	0.769653
			MGI:3779984	Gm9575	0.666703
			MGI:1918017	Prpf3	0.783433
			MGI:1306778	Map1b	0.410357
			MGI:1922088	Naa15	0.740031
			MGI:1921590	Ahcyl2	0.784669
			MGI:1278336	Cdkl5	0.764552
			MGI:1100851	Elavl1	0.851105
			MGI:107252	Nsun2	0.729533
			MGI:1922869	Fastkd2	0.727077
			MGI:1913382	1110008L16Rik	0.801092
			MGI:1351622	Mrpl2	0.789854
			MGI:1915217	Pold3	0.655746
			MGI:1916509	Kctd5	0.817276
			MGI:1913951	Spryd4	0.792092
			MGI:1916491	Polr2d	0.791782
			MGI:3649718	Gm12241	0.600043
			MGI:88393	Chd1	0.668018
			MGI:101934	Tfdp1	0.772913
			MGI:88547	Csnk2a2	0.766508
			MGI:1098824	Odf2	0.784225
			MGI:1933825	Jam3	0.739436
			MGI:2138741	Hnrnpf	0.839541
			MGI:96239	Hsf2	0.769751
			MGI:1918951	Pnpt1	0.6968
			MGI:1929743	Asb2	0.668862
			MGI:1913894	Uba6	0.732872
			MGI:101916	Fabp7	0.388331
			MGI:1354696	Fbxo8	0.83733
			MGI:102520	Phb2	0.808994
			MGI:1923392	Ppp1r14c	0.579584
			MGI:2445054	Senp1	0.774385
			MGI:106478	Eif3b	0.795678
			MGI:1913921	Ccnh	0.78559
			MGI:1931871	Wdr46	0.740658
			MGI:95459	Zfp521	0.767311
			MGI:1931322	Car13	0.763755
			MGI:1098754	Psmc3	0.804841
			MGI:1342307	Drg2	0.821741
			MGI:2139607	Usp53	0.779349
			MGI:1919207	Cpsf3l	0.753428
			MGI:1921435	Gbe1	0.730635
			MGI:1916962	Prpf38a	0.807855
			MGI:109555	Psmc2	0.752001
			MGI:1341868	Rfc2	0.781521
			MGI:1919238	Esco2	0.764482
			MGI:103149	Uchl1	0.554624
			MGI:106572	Imp4	0.801133
			MGI:1922666	Nop14	0.76256
			MGI:87912	Acvr2b	0.689476
			MGI:1349415	Cops5	0.79189
			MGI:108360	Enah	0.704853
			MGI:1914715	Sf3a1	0.794801
			MGI:1913773	2810004N23Rik	0.746538
			MGI:1890359	Igf2bp3	0.675052
			MGI:2446214	Man1c1	0.746946
			MGI:1926274	Mrpl19	0.770218
			MGI:1859017	Elp5	0.811766
			MGI:1914264	Mina	0.639823
			MGI:1913129	Rbm8a	0.79865
			MGI:87902	Acta1	0.587482
			MGI:2449311	Gemin5	0.746114
			MGI:107943	Cct6a	0.816856
			MGI:1929286	Amotl2	0.760839
			MGI:1914251	Rrp8	0.807513
			MGI:1354959	Hs6st2	0.748067
			MGI:2183445	Spsb4	0.552388
			MGI:2448480	Fancd2	0.746786
			MGI:1098643	Coq5	0.767782
			MGI:2146468	Urb1	0.705351
			MGI:1342295	Celf1	0.723251
			MGI:107184	Cct7	0.83205
			MGI:107933	Mns1	0.663338
			MGI:894289	Ebf3	0.527106
			MGI:88557	Pcyt1a	0.805447
			MGI:1353638	Rps12-ps1	0.716434
			MGI:1928760	Ruvbl1	0.784416
			MGI:1914321	Rps6ka6	0.589637
			MGI:2145443	Utp15	0.765639
			MGI:1919588	Wdr89	0.768004
			MGI:1923310	Isy1	0.805072
			MGI:90676	Lsm2	0.788591
			MGI:1101759	Rnf2	0.826862
			MGI:3705743	Gm15210	0.700922
			MGI:1928137	Mrps22	0.769397
			MGI:2388280	Polr2b	0.805892
			MGI:1914347	Rps10	0.66432
			MGI:1261847	Vrk1	0.817403
			MGI:107684	Plxna2	0.607521
			MGI:1914315	Polr3d	0.818609
			MGI:2387100	Dusp7	0.740843
			MGI:2144224	Wdr92	0.774748
			MGI:1277119	Zfp105	0.798748
			MGI:2681840	Rsl24d1	0.688508
			MGI:1913419	Tomm7	0.664214
			MGI:1923488	Grhpr	0.765739
			MGI:1859328	Cpsf3	0.792498
			MGI:1919421	Shq1	0.8217
			MGI:1919712	Rrp1b	0.737041
			MGI:1349467	Abcd2	0.685768
			MGI:2143558	Chchd10	0.76139
			MGI:1858258	Eif3g	0.724081
			MGI:1923008	9130401M01Rik	0.754106
			MGI:97584	Pim1	0.729099
			MGI:1890621	Donson	0.774256
			MGI:1926269	Mrpl38	0.801702
			MGI:104771	Erbb4	0.716816
			MGI:1913482	Sssca1	0.772377
			MGI:1916806	Bod1	0.766747
			MGI:1918248	Phf6	0.78761
			MGI:1913456	1110059E24Rik	0.719242
			MGI:1933155	Arl4d	0.735863
			MGI:1919451	Otud6b	0.715695
			MGI:1933438	Slc16a3	0.494249
			MGI:95611	Gabpb1	0.805114
			MGI:97890	Rad51	0.671211
			MGI:2143585	Fig4	0.708925
			MGI:1914176	Trmt6	0.787836
			MGI:88355	Cdh2	0.653285
			MGI:1916974	Rnaseh2a	0.799751
			MGI:1915985	Mrps18c	0.749139
			MGI:1917370	Yars2	0.754338
			MGI:98788	Top1	0.805873
			MGI:2384887	Chtf18	0.82627
			MGI:3641891	Gm15470	0.676384
			MGI:1913459	Inip	0.829
			MGI:1347045	Psmb2	0.817471
			MGI:1926784	Tagln3	0.517473
			MGI:104708	Cct3	0.753451
			MGI:107810	Tfam	0.782686
			MGI:3045253	Scube3	0.668336
			MGI:1933744	Cenpq	0.683759
			MGI:1914587	Cstf1	0.831626
			MGI:1354165	Thop1	0.742157
			MGI:90675	Vars	0.739874
			MGI:2145661	Ankrd28	0.74589
			MGI:1914974	Pop1	0.714484
			MGI:104517	Xrcc5	0.800875
			MGI:2146335	C330027C09Rik	0.770721
			MGI:1890430	Paxip1	0.787821
			MGI:2443149	Gen1	0.756029
			MGI:1891832	Patz1	0.837353
			MGI:2178445	Ppan	0.759964
			MGI:1344375	Prkra	0.796634
			MGI:1351352	Atic	0.722572
			MGI:1100510	Bub1	0.744801
			MGI:104537	Brca1	0.767508
			MGI:1935129	Smarca5	0.744351
			MGI:1098269	Kif5c	0.536838
			MGI:1916321	Tmem97	0.739735
			MGI:1918335	Arhgap19	0.807845
			MGI:1915393	Herpud2	0.821306
			MGI:1339975	Pak1	0.72978
			MGI:1346333	Mrps12	0.752033
			MGI:1915255	Naa10	0.737207
			MGI:98797	Tpi1	0.752379
			MGI:1333820	Mrpl30	0.785651
			MGI:1933331	Elovl4	0.721163
			MGI:1353433	Timm8a1	0.556662
			MGI:108476	Fzd3	0.499614
			MGI:1891704	Hbs1l	0.776116
			MGI:1889818	Tspan12	0.732241
			MGI:1914981	Fbxo32	0.785996
			MGI:1917302	Prpf4	0.779873
			MGI:2138939	Nat10	0.748681
			MGI:1341044	Alyref	0.785073
			MGI:107435	Cdh6	0.527379
			MGI:1197514	Pole2	0.757567
			MGI:2137219	Mrpl16	0.752516
			MGI:1349388	Cops7b	0.813606
			MGI:98940	Vtn	0.533629
			MGI:1913828	Mis18a	0.810343
			MGI:1913415	Bccip	0.789086
			MGI:1920960	Tubb2b	0.562654
			MGI:1913375	Sf3b5	0.740998
			MGI:2442620	Nup133	0.770567
			MGI:1915403	Gtf2e2	0.763477
			MGI:1916023	Zc3hc1	0.800427
			MGI:1918568	Pmpca	0.835482
			MGI:1923731	Eif4a3	0.792508
			MGI:1858415	Ddx20	0.810741
			MGI:2140494	Ppp1r8	0.825099
			MGI:2429770	Nle1	0.760768
			MGI:107822	Ebp	0.775842
			MGI:1919834	Cul4b	0.767856
			MGI:1890563	Wasf1	0.770104
			MGI:1347481	Foxc2	0.592333
			MGI:1195268	Sigmar1	0.811833
			MGI:2446176	Eif2b5	0.783373
			MGI:2446977	Kif18a	0.728882
			MGI:2158736	Senp3	0.843617
			MGI:1913929	Rae1	0.813172
			MGI:1918834	Gdpd2	0.815964
			MGI:2138069	Hmgn3	0.726235
			MGI:1353586	Lmo7	0.754488
			MGI:88474	Cox5a	0.786032
			MGI:1913733	Rpl36al	0.777337
			MGI:1277143	Gtf2h3	0.82403
			MGI:2685813	Fam189a2	0.686415
			MGI:1920422	Exo5	0.843137
			MGI:98218	Prrx2	0.639418
			MGI:2443063	Mylk3	0.713533
			MGI:2442293	Usp28	0.760993
			MGI:1913412	Bola2	0.752808
			MGI:1354175	Txnrd1	0.794353
			MGI:107956	Slc8a1	0.636019
			MGI:1933820	Jam2	0.701484
			MGI:3779453	Prps1l3	0.763031
			MGI:1353653	Glrx3	0.696414
			MGI:1921771	Ppp4r4	0.826638
			MGI:2155884	Wdr5	0.839925
			MGI:103302	Bmp7	0.811569
			MGI:107862	Nop16	0.820398
			MGI:1922901	Psmg2	0.798021
			MGI:3704324	Rps12-ps9	0.607539
			MGI:98865	Ttr	0.721894
			MGI:97402	Odc1	0.73291
			MGI:1918249	Naa40	0.787143
			MGI:1919918	Skida1	0.802805
			MGI:1929285	Orc6	0.725921
			MGI:1351465	G3bp1	0.820288
			MGI:103027	Tarbp2	0.818232
			MGI:1915587	Crip2	0.726439
			MGI:1355319	Exosc9	0.734419
			MGI:1915419	Ndnf	0.686054
			MGI:1261797	Cdkn2aipnl	0.826656
			MGI:97367	Nppa	0.516457
			MGI:98783	Tnni3	0.813945
			MGI:3645626	Gm16433	0.704066
			MGI:1334460	Bop1	0.791556
			MGI:1891468	Lgr4	0.548888
			MGI:1917271	Nt5dc2	0.817215
			MGI:3651545	Rpsa-ps4	0.701196
			MGI:1858305	Pgrmc1	0.799934
			MGI:2442894	Cobll1	0.787631
			MGI:1913635	Ppp1r7	0.84885
			MGI:1919227	Zdhhc13	0.744132
			MGI:1333863	Pde3b	0.778898
			MGI:101790	Fabp5	0.604813
			MGI:1339939	Rpa2	0.790111
			MGI:104885	Psma2	0.758473
			MGI:1914631	Med4	0.791601
			MGI:1347014	Psmb3	0.705197
			MGI:97552	Pgam1	0.62436
			MGI:1933184	Nop58	0.79533
			MGI:1925505	Ralgps2	0.786639
			MGI:1927170	Spata5	0.757022
			MGI:1343044	Rbmx	0.811766
			MGI:2443767	Aaas	0.794844
			MGI:104680	Hspe1	0.761364
			MGI:2158400	Wdr18	0.803585
			MGI:1341200	Pwp2	0.787954
			MGI:1342299	Ruvbl2	0.821871
			MGI:107202	Atm	0.69803
			MGI:1924038	Klhdc10	0.836337
			MGI:1860512	Prpf40a	0.804147
			MGI:1915050	Dgat2	0.787566
			MGI:1858416	Stk39	0.802377
			MGI:1924885	Socs6	0.74742
			MGI:1923864	Immt	0.832931
			MGI:1927165	Mettl3	0.787933
			MGI:2384790	Fanci	0.776859
			MGI:1915560	Zmym1	0.756632
			MGI:1889002	Wdr4	0.788862
			MGI:1914371	Mastl	0.756543
			MGI:2137202	Mrpl1	0.775548
			MGI:1914210	Fam188a	0.752466
			MGI:106381	D10Wsu102e	0.809767
			MGI:1925544	Rps27a	0.74418
			MGI:2146974	Safb	0.80884
			MGI:1351502	Nup50	0.815256
			MGI:1925901	Lsm6	0.813409
			MGI:2449121	Nme7	0.803066
			MGI:1333752	Hdac6	0.792693
			MGI:1915082	Brix1	0.77236
			MGI:104556	Cdkn1a	0.790336
			MGI:1914803	Gstcd	0.81939
			MGI:1918849	Senp8	0.732349
			MGI:1913760	Rnf181	0.828979
			MGI:109495	Nfil3	0.774982
			MGI:1096355	S1pr1	0.81916
			MGI:97621	Plk1	0.823476
			MGI:1889208	Cks1b	0.787506
			MGI:102890	Ccng1	0.752682
			MGI:1339977	Agtrap	0.818584
			MGI:87881	Acp1	0.79017
			MGI:1913840	Farsa	0.827351
			MGI:88451	Col18a1	0.81548
			MGI:1914729	Tmem183a	0.837594
			MGI:2684957	Rexo4	0.802051
			MGI:1351639	Mrpl15	0.815955
			MGI:1916951	Slc7a6os	0.796797
			MGI:1922874	Metap1	0.850321
			MGI:109347	Lum	0.51858
			MGI:1916051	Elovl5	0.815662
			MGI:104960	Tnfaip2	0.849053
			MGI:106314	Tars	0.765928
			MGI:1915099	Cdca5	0.754163
			MGI:88316	Ccne1	0.825074
			MGI:1929237	Pus1	0.835281
			MGI:104799	Pea15a	0.764471
			MGI:5456217	Gm26440	0.773333
			MGI:1914679	Nudcd1	0.778936
			MGI:1277989	Shmt2	0.741543
			MGI:1915469	Nudt21	0.7513
			MGI:1330276	Cops2	0.771385
			MGI:1916394	Slirp	0.645866
			MGI:99611	Ephb2	0.736737
			MGI:104677	Man1a	0.761122
			MGI:1341872	Tjp2	0.790324
			MGI:1914148	Baiap2l1	0.714717
			MGI:87947	Adssl1	0.813795
			MGI:1919420	Chchd4	0.759897
			MGI:1919224	Prmt3	0.763652
			MGI:1914824	Alg13	0.791301
			MGI:2147437	Rrp12	0.730891
			MGI:97368	Nppb	0.738861
			MGI:1915842	Syf2	0.809986
			MGI:97547	Pfkl	0.651986
			MGI:2141989	Grwd1	0.750043
			MGI:1923759	Plet1	0.732468
			MGI:894684	Pa2g4	0.809794
			MGI:2444593	Pptc7	0.797803
			MGI:2445102	Dhx33	0.779364
			MGI:1915674	Chn1	0.803647
			MGI:107185	Cct5	0.834931
			MGI:88613	Cyr61	0.807127
			MGI:894683	Npm3-ps1	0.662584
			MGI:1927224	Yeats4	0.782634
			MGI:1352760	Hdgfrp3	0.740568
			MGI:1914466	Mboat2	0.812665
			MGI:1913846	Gtf3a	0.745436
			MGI:1349478	Zw10	0.801189
			MGI:2139090	Stard7	0.823183
			MGI:1922873	Tex30	0.69502
			MGI:109582	Polr2j	0.758779
			MGI:104667	Hmmr	0.757139
			MGI:1917294	Tut1	0.818879
			MGI:1913944	Uqcrfs1	0.777497
			MGI:1916889	Exosc8	0.788214
			MGI:1347006	Psma6	0.807536
			MGI:1889278	Pdss1	0.759095
			MGI:1197010	Sumo1	0.707117
			MGI:107549	Tbca	0.722369
			MGI:102682	Llgl1	0.801654
			MGI:2385276	Kctd15	0.846714
			MGI:1914403	Rnaseh2b	0.768961
			MGI:1917635	Spdl1	0.773577
			MGI:108389	Kif4	0.798835
			MGI:2443069	Ppwd1	0.773601
			MGI:1339951	Cse1l	0.845163
			MGI:1919174	Tube1	0.776038
			MGI:2444490	Syt14	0.723363
			MGI:98858	Psmd3	0.820816
			MGI:1923786	Mmadhc	0.777946
			MGI:1888939	2016-09-06	0.804464
			MGI:1920026	Sass6	0.778144
			MGI:105080	Tgoln1	0.803746
			MGI:1917605	Gprc5c	0.824832
			MGI:2145219	Iars	0.75981
			MGI:1289227	Zwint	0.843452
			MGI:106393	Tspyl4	0.699538
			MGI:1925016	Elp4	0.791576
			MGI:1916296	Isca1	0.723071
			MGI:1098806	Commd2	0.807725
			MGI:1929485	Nif3l1	0.840089
			MGI:1915278	Rpl22l1	0.569581
			MGI:1344413	Tex10	0.829539
			MGI:1920382	Slc25a16	0.806327
			MGI:1914203	Cdca7	0.785436
			MGI:1918345	Kif24	0.812422
			MGI:2388481	Ppp2r5d	0.852764
			MGI:105380	Mcm2	0.801373
			MGI:107444	Efna5	0.665457
			MGI:105091	E2f5	0.660746
			MGI:107891	Nop2	0.752497
			MGI:1915551	Cep57	0.822886
			MGI:1923001	Ipo4	0.810162
			MGI:1914175	Sdhd	0.846236
			MGI:1915202	Tomm20	0.703819
			MGI:1919051	Plekhf2	0.812098
			MGI:3709029	Dnajc19-ps	0.761818
			MGI:2388479	Ppp2r5a	0.778361
			MGI:1919736	Rnf219	0.801784
			MGI:1934754	Kars	0.834836
			MGI:5455608	Gm25831	0.663994
			MGI:1927470	Spag5	0.803948
			MGI:1928900	Ehd3	0.849836
			MGI:1919448	Skiv2l2	0.778905
			MGI:2443881	Rasal2	0.745227
			MGI:2384313	Rrp9	0.776428
			MGI:1888518	Vav3	0.833181
			MGI:2441711	Supv3l1	0.813113
			MGI:1343101	Kat2a	0.834008
			MGI:1340051	Gpr56	0.74006
			MGI:106582	Rfx3	0.694164
			MGI:107930	Pip5k1b	0.814161
			MGI:1913388	Wbscr22	0.831411
			MGI:1919906	Ints8	0.82696
			MGI:1922392	4930529C04Rik	0.634957
			MGI:107612	Rtn2	0.79102
			MGI:1276574	Whsc1	0.655895
			MGI:2141942	Ccp110	0.771602
			MGI:2183453	Dlgap5	0.820357
			MGI:1336194	Tpp1	0.824535
			MGI:3590554	BC055324	0.792969
			MGI:2151071	C1galt1	0.783918
			MGI:1926321	Postn	0.514015
			MGI:1261425	Drosha	0.751684
			MGI:1914492	Gemin6	0.721904
			MGI:98887	Uba52	0.389955
			MGI:1196293	Tubgcp4	0.803429
			MGI:1914411	Sclt1	0.761292
			MGI:1336173	Prkaa2	0.739951
			MGI:1913884	Mcm8	0.695302
			MGI:1914172	Rras2	0.744032
			MGI:101864	Dag1	0.793848
			MGI:1861606	Tacstd2	0.837744
			MGI:1344391	Sh3bp5	0.840361
			MGI:1298398	Mcm7	0.822857
			MGI:2142347	Zfp568	0.714383
			MGI:1914053	Hmces	0.821129
			MGI:1298227	Mcm6	0.842882
			MGI:2142364	Hirip3	0.814429
			MGI:1341112	Parp2	0.84047
			MGI:1920931	Trmt11	0.766134
			MGI:108089	Erh	0.480789
			MGI:1933623	Smarcd1	0.773234
			MGI:2677850	BC026590	0.822894
			MGI:2156864	Phf5a	0.808343
			MGI:1919357	Dscc1	0.798532
			MGI:1351655	Shroom3	0.779933
			MGI:1921445	Elp3	0.874513
			MGI:1919668	Thoc1	0.779148
			MGI:104888	Fdps	0.733158
			MGI:894649	Ppfibp2	0.784372
			MGI:1920093	Prdm4	0.828361
			MGI:1913504	Dimt1	0.723806
			MGI:1913655	Mcts2	0.822947
			MGI:1919369	Tpx2	0.834961
			MGI:3645252	Gm5844	0.741798
			MGI:95299	Eif2s1	0.783331
			MGI:1206586	Bap1	0.864496
			MGI:2685723	Ccnjl	0.807878
			MGI:1925213	Hook1	0.781709
			MGI:2660674	Mrpl21	0.823899
			MGI:1329037	Strap	0.862195
			MGI:893575	Plscr1	0.837852
			MGI:1923684	Churc1	0.761956
			MGI:1354367	Mrps7	0.814119
			MGI:2384308	Pdk3	0.82286
			MGI:1343262	Timm44	0.849874
			MGI:1858510	Nell2	0.595208
			MGI:1098533	Ints9	0.834407
			MGI:2682302	Zbed4	0.763985
			MGI:98299	Shmt1	0.778196
			MGI:107157	Sin3a	0.830919
			MGI:97758	Prim2	0.833082
			MGI:1914469	Med18	0.813469
			MGI:1923686	Tufm	0.785503
			MGI:1914621	Gtf3c6	0.830682
			MGI:3041225	Shisa3	0.774679
			MGI:1927167	Morf4l2	0.848413
			MGI:2384963	Stxbp6	0.799038
			MGI:1914472	Srfbp1	0.813722
			MGI:108069	Ccna2	0.831497
			MGI:1858961	Prc1	0.815183
			MGI:1925939	Naa35	0.838107
			MGI:87983	Alpl	0.800195
			MGI:96398	Id3	0.688738
			MGI:1914427	Cdt1	0.78857
			MGI:97171	Mt1	0.526657
			MGI:1917544	Rnf126	0.830466
			MGI:1274789	Taldo1	0.788218
			MGI:1918511	Poc1b	0.823948
			MGI:3039573	Ttll12	0.837485
			MGI:1914384	Nop56	0.819783
			MGI:107682	Ppp1r14b	0.815122
			MGI:3645883	Rps12-ps16	0.641017
			MGI:96242	Hspd1	0.715901
			MGI:1349393	Polr2f	0.792882
			MGI:3046173	Nup85	0.846815
			MGI:1352451	Nr2f1	0.583761
			MGI:2148199	Pecr	0.758462
			MGI:1333780	Rps19	0.593438
			MGI:101938	Mlh1	0.813534
			MGI:2442186	Trub2	0.822284
			MGI:1345186	Blmh	0.852271
			MGI:107813	Tubb3	0.454809
			MGI:2384982	Cdca7l	0.791518
			MGI:1914731	Alg2	0.840712
			MGI:2150152	Ubqln4	0.82886
			MGI:2143854	Nup107	0.827224
			MGI:102779	Fen1	0.754571
			MGI:1917206	Ptcd3	0.743791
			MGI:2135272	Vangl2	0.744699
			MGI:1914454	Eif2s2	0.786299
			MGI:1098231	Kif11	0.779051
			MGI:1334448	Aspm	0.749739
			MGI:1355335	Tmod2	0.781249
			MGI:2442342	Uspl1	0.836266
			MGI:1298390	Swap70	0.827769
			MGI:1921451	Cep97	0.760851
			MGI:1913625	Dhrs7	0.829616
			MGI:95530	Fh1	0.814232
			MGI:1922974	Ccdc18	0.759281
			MGI:104883	Psma3	0.775238
			MGI:1914797	Slc39a8	0.79861
			MGI:1914248	Psmd5	0.809472
			MGI:1919907	2700094K13Rik	0.723615
			MGI:2679294	Zc4h2	0.834245
			MGI:97565	Pgm2	0.718401
			MGI:1203500	Rrp1	0.849634
			MGI:104805	Snrpb2	0.779215
			MGI:2442184	Flcn	0.823255
			MGI:1338027	Gdf11	0.790648
			MGI:1913649	Tsfm	0.788263
			MGI:1929091	Fam60a	0.713348
			MGI:1915091	Atg3	0.807268
			MGI:1916942	Hddc2	0.787358
			MGI:104565	Cdkn1b	0.843152
			MGI:97503	Pcna	0.812409
			MGI:1860292	Ramp3	0.803343
			MGI:5452750	Gm22973	0.723618
			MGI:1351511	Psmd7	0.845383
			MGI:1914192	Ddx18	0.831075
			MGI:2384836	BC027231	0.782701
			MGI:2384986	Rnf144b	0.86998
			MGI:894308	Rab21	0.844599
			MGI:2442213	Plekha1	0.829846
			MGI:1351333	Thoc5	0.780494
			MGI:96951	Mdm1	0.821602
			MGI:99892	Lama1	0.678774
			MGI:98158	Rps4x	0.288707
			MGI:1920723	Iws1	0.809603
			MGI:1913887	Tsen15	0.750851
			MGI:98423	Ssb	0.790758
			MGI:2140279	Tdrd7	0.849135
			MGI:2389572	Brcc3	0.798455
			MGI:1316708	Ifrd2	0.802249
			MGI:1352754	Clic4	0.834945
			MGI:103071	Rangap1	0.840399
			MGI:95393	Eno1	0.699649
			MGI:96157	Hmgb2	0.706268
			MGI:1917704	Cenpl	0.831166
			MGI:1860263	Psmg1	0.789449
			MGI:1916199	1500012F01Rik	0.820241
			MGI:2442082	Tmem30b	0.8158
			MGI:1923373	Gpsm2	0.842996
			MGI:1340806	Parp1	0.842368
			MGI:1913844	Uqcr11	0.760515
			MGI:1336213	Mybpc1	0.846568
			MGI:1917890	Dcp2	0.797444
			MGI:1913934	Tceal8	0.829866
			MGI:1347070	Psma7	0.771302
			MGI:1925179	Yipf6	0.819521
			MGI:2146620	Srl	0.816525
			MGI:1261820	Cand1	0.836528
			MGI:1929538	Dap3	0.860445
			MGI:97622	Pln	0.616426
			MGI:1918590	Riok1	0.856349
			MGI:109611	Dsp	0.661927
			MGI:3712328	Pnp2	0.731812
			MGI:88302	Ccnb1	0.797125
			MGI:106014	Nudc	0.80742
			MGI:3576783	Eme1	0.826368
			MGI:1913653	Asf1a	0.821641
			MGI:1918084	Spag9	0.747612
			MGI:1927073	Slc29a1	0.818084
			MGI:1890471	Pcbp4	0.717861
			MGI:1196256	Kdm1a	0.790606
			MGI:1916782	Hopx	0.71605
			MGI:1298407	Tspan7	0.83762
			MGI:2146571	Rfc4	0.815667
			MGI:1927099	Rplp1	0.851981
			MGI:1353429	Timm10	0.751799
			MGI:1098622	Rif1	0.748466
			MGI:3650235	Gm13080	0.681265
			MGI:109519	Msh3	0.813673
			MGI:1338011	Auh	0.846714
			MGI:1919374	Seh1l	0.80627
			MGI:1349427	Exo1	0.793711
			MGI:109166	Ncs1	0.83038
			MGI:1921054	Kif2c	0.817448
			MGI:96692	Krt18	0.72147
			MGI:1914339	Psmc6	0.76373
			MGI:2137218	Mrpl13	0.799662
			MGI:1914361	Naaa	0.701486
			MGI:3642803	Gm10033	0.730215
			MGI:1918115	Lnp	0.820134
			MGI:1924261	Ticrr	0.777874
			MGI:1914853	Dusp6	0.802907
			MGI:1346319	Hax1	0.762385
			MGI:2183149	Nadk	0.850598
			MGI:1354737	Kdm2b	0.79113
			MGI:1913731	Rps21	0.751133
			MGI:1929274	1110004F10Rik	0.846588
			MGI:1917132	Vwa9	0.865428
			MGI:2151075	Tnfrsf21	0.794995
			MGI:1333774	Mrpl42	0.714843
			MGI:1915264	Zwilch	0.776474
			MGI:1891829	Rbx1	0.788847
			MGI:1098658	Stag1	0.814341
			MGI:1915363	Cops8	0.887136
			MGI:1201610	Tex9	0.747898
			MGI:1345669	Gtf2h2	0.85727
			MGI:1917722	Atad2	0.813054
			MGI:1917794	Tmem242	0.818229
			MGI:1915984	Smek1	0.767621
			MGI:109337	Brca2	0.734164
			MGI:1914071	Bcs1l	0.820887
			MGI:102690	Srm	0.769526
			MGI:104627	Dst	0.703183
			MGI:3642454	Gm10012	0.808741
			MGI:1913747	Cmss1	0.798574
			MGI:2684980	Mms22l	0.741577
			MGI:2143994	Psme4	0.773051
			MGI:88375	Cenpa	0.83085
			MGI:1915462	Tmbim4	0.838376
			MGI:894652	Usp10	0.839323
			MGI:105053	Hsph1	0.739273
			MGI:1930009	Ppp2r3c	0.7912
			MGI:88407	Ckb	0.575193
			MGI:97830	Pygm	0.81577
			MGI:109618	Atp6v1b2	0.832219
			MGI:1890613	Pes1	0.800698
			MGI:2445173	Ppig	0.839739
			MGI:97572	Phb	0.78065
			MGI:1919414	Rbmx2	0.836882
			MGI:1923824	Mfsd2a	0.727423
			MGI:1914944	Ift74	0.77816
			MGI:1860206	Ammecr1	0.784219
			MGI:1923017	Rab11fip1	0.781352
			MGI:1914473	Rrp15	0.807889
			MGI:1915402	Fam133b	0.837081
			MGI:1924209	Chmp5	0.834006
			MGI:98443	Surf1	0.844869
			MGI:1917745	Atp6ap2	0.859814
			MGI:2140750	Zfp518b	0.748152
			MGI:1352457	Nr4a3	0.906767
			MGI:1100868	Tbrg4	0.758697
			MGI:107163	Ppp3cb	0.839123
			MGI:1919367	Naa50	0.853009
			MGI:88431	Cnbp	0.832004
			MGI:1915472	Tubb4b	0.774916
			MGI:1919908	2700097O09Rik	0.755708
			MGI:1925751	Itih5	0.816362
			MGI:96904	M6pr	0.8215
			MGI:2146159	Alg10b	0.851625
			MGI:1926210	Cenpk	0.729523
			MGI:1913358	Ndufa9	0.815938
			MGI:1914286	Mrpl45	0.805597
			MGI:107362	Stxbp3a	0.824259
			MGI:1917822	Ipo5	0.79324
			MGI:2137668	Zfhx4	0.664128
			MGI:1914134	Appbp2	0.865364
			MGI:2141599	Tsen2	0.840565
			MGI:2681124	Urb2	0.736339
			MGI:109257	Smn1	0.793419
			MGI:2137227	Mrpl34	0.789342
			MGI:106908	Srpk1	0.832095
			MGI:2385066	Rprd1a	0.852339
			MGI:1333889	Bub1b	0.853598
			MGI:106417	Cherp	0.830121
			MGI:1919055	Nup93	0.836655
			MGI:3643807	Gm5619	0.780452
			MGI:109531	Cdc37	0.785446
			MGI:1914394	Lrrc40	0.820413
			MGI:1343054	Cstf2	0.864164
			MGI:3780369	Gm2199	0.772091
			MGI:1917665	2610018G03Rik	0.788795
			MGI:95775	Gnao1	0.792905
			MGI:3643105	Gm7079	0.726094
			MGI:1338035	Itgb8	0.62477
			MGI:1914380	Ndufa6	0.83745
			MGI:2442483	Usp37	0.777436
			MGI:103199	Mcm4	0.859925
			MGI:2135625	Glrx	0.778206
			MGI:1096584	Psmd2	0.858081
			MGI:1920640	Msl3l2	0.856771
			MGI:1914455	Utp11l	0.821652
			MGI:98488	Slc6a6	0.783236
			MGI:105313	Cit	0.804564
			MGI:1100537	Mid1	0.640311
			MGI:3704345	Rps27rt	0.443603
			MGI:1914295	Riok2	0.824962
			MGI:101834	Tubg1	0.844624
			MGI:109326	Bnip3	0.717678
			MGI:2385599	Gtpbp10	0.777127
			MGI:2385287	Spon1	0.685543
			MGI:1917349	Smc4	0.838604
			MGI:106687	Pon2	0.836397
			MGI:1915442	Leprotl1	0.831407
			MGI:1921636	Rmi1	0.79985
			MGI:107532	Kpnb1	0.822018
			MGI:3590652	Txlng	0.859783
			MGI:1346861	Mapk8	0.820398
			MGI:2152938	Srgap3	0.726904
			MGI:1914750	Ccar1	0.82485
			MGI:1921504	Gpn1	0.82504
			MGI:3650834	Gm11249	0.835873
			MGI:1929608	Aatf	0.800075
			MGI:1314881	Chaf1b	0.834966
			MGI:2443241	Ndufs1	0.856304
			MGI:1335087	Fem1b	0.821651
			MGI:88042	Apex1	0.812549
			MGI:1203517	Birc5	0.812879
			MGI:1858230	Sart3	0.838371
			MGI:1891731	Stub1	0.785917
			MGI:1913606	Knop1	0.794567
			MGI:3644742	Gm7618	0.75146
			MGI:1926424	Nelfcd	0.849584
			MGI:1919069	Kif23	0.849572
			MGI:95283	Edn1	0.801662
			MGI:1916229	Nol11	0.826097
			MGI:1916913	Ddx51	0.830165
			MGI:1914199	Trim59	0.789818
			MGI:1341878	Ehd1	0.875412
			MGI:1891763	Ppp4c	0.841786
			MGI:1914391	Fbxo5	0.803705
			MGI:1315195	Emg1	0.82594
			MGI:2685365	Slc35g2	0.862708
			MGI:1913910	Sltm	0.806057
			MGI:95543	Fkbp4	0.838381
			MGI:1919349	Elp6	0.844766
			MGI:3781748	Gm3571	0.780835
			MGI:104884	Psmb1	0.814217
			MGI:88110	Atp2a2	0.75364
			MGI:1196429	Atg13	0.878939
			MGI:1921020	Wdr70	0.858951
			MGI:1100819	Aff1	0.872179
			MGI:2442925	Atad5	0.7808
			MGI:3649794	Gm11353	0.660413
			MGI:1915033	Ahctf1	0.796838
			MGI:1332635	Mrpl40	0.798006
			MGI:1930943	Rrad	0.842641
			MGI:1920249	Insig2	0.832148
			MGI:88452	Col2a1	0.790241
			MGI:1930197	Ncapg	0.78948
			MGI:1922680	Anapc15	0.822266
			MGI:1923294	Ncapg2	0.79072
			MGI:99486	Clcn5	0.802759
			MGI:1919234	Sars2	0.841547
			MGI:2664902	Mark1	0.873181
			MGI:1347009	Psma5	0.822902
			MGI:97172	Mt2	0.445503
			MGI:1919747	Zc3h15	0.815509
			MGI:1890948	Supt16	0.844668
			MGI:1931744	Uck2	0.789598
			MGI:1913675	Pcp4l1	0.848572
			MGI:1860489	Ptbp2	0.782605
			MGI:1194910	Rbbp7	0.891734
			MGI:3026924	Fam84b	0.799159
			MGI:2157785	Peg10	0.620198
			MGI:1101357	Ece1	0.810967
			MGI:105047	Psmc5	0.846915
			MGI:1858234	Caprin1	0.883496
			MGI:2448490	Sbno2	0.855685
			MGI:1918699	Mettl13	0.831758
			MGI:1098592	Alg3	0.823718
			MGI:891969	Serpina1c	0.8367
			MGI:1918135	Ints10	0.861662
			MGI:1913781	Cmc2	0.850553
			MGI:1924188	Rbm17	0.820672
			MGI:1914413	Ccdc47	0.842816
			MGI:1927468	Samhd1	0.857161
			MGI:1917931	Fam175a	0.877489
			MGI:3650608	Gm11942	0.826098
			MGI:1915490	Rpa3	0.782961
			MGI:1321393	Timeless	0.860747
			MGI:1913475	Llph	0.745846
			MGI:101784	Nes	0.748274
			MGI:1922066	Tpr	0.774503
			MGI:1098297	Cpt1b	0.771298
			MGI:2145021	Trib2	0.774792
			MGI:1917887	Ankrd26	0.832216
			MGI:1917606	St13	0.832787
			MGI:1926119	Pdk1	0.680266
			MGI:107799	Gadd45a	0.808976
			MGI:3805541	Gm15772	0.481531
			MGI:1921571	Tipin	0.816929
			MGI:88108	Atp1b1	0.709121
			MGI:1921134	Zdbf2	0.680106
			MGI:2142292	Mtmr10	0.864701
			MGI:1341163	Tacc3	0.841213
			MGI:3651313	Gm11824	0.698107
			MGI:1915434	Denr	0.839029
			MGI:2444518	Samd12	0.874275
			MGI:1201679	Cxadr	0.845776
			MGI:1915254	Tmem9b	0.841163
			MGI:3646897	Gm6136	0.876012
			MGI:1914907	Rabl3	0.816905
			MGI:3649393	Gm14263	0.87187
			MGI:1922867	Rps25	0.752124
			MGI:1915821	1110002L01Rik	0.791117
			MGI:1935167	Hspe1-ps6	0.701913
			MGI:95486	Fbl	0.807359
			MGI:1353606	Siva1	0.812402
			MGI:2444576	Kif20b	0.745765
			MGI:108474	Fzd6	0.83744
			MGI:99257	Eif3e	0.807639
			MGI:2446190	Nup188	0.844377
			MGI:97757	Prim1	0.854448
			MGI:1916885	Dapk1	0.750579
			MGI:1342273	Gsto1	0.784179
			MGI:104288	Pms2	0.839398
			MGI:1921361	Rbm19	0.829247
			MGI:1914302	Ndc80	0.835601
			MGI:2386853	Rassf4	0.723761
			MGI:108396	Dtymk	0.827253
			MGI:1929671	Mllt11	0.680412
			MGI:1914162	Bzw2	0.859205
			MGI:104880	Psmb6	0.817146
			MGI:1913401	Prr13	0.830415
			MGI:1914342	Gatm	0.759198
			MGI:1917933	Utp20	0.764676
			MGI:1201780	Atp6v1a	0.873577
			MGI:97281	Ncam1	0.747567
			MGI:1929520	Eef1b2	0.861009
			MGI:1913462	Sec61b	0.756935
			MGI:1913431	Nop10	0.722432
			MGI:1929116	Zfp113	0.849562
			MGI:1328318	Atp6v0e	0.785183
			MGI:5439751	Gm21994	0.791076
			MGI:106181	Mybbp1a	0.806588
			MGI:2155456	Bmp2k	0.855332
			MGI:2444266	Ube2o	0.833789
			MGI:2388637	Wwc1	0.863458
			MGI:1931071	Sec61a2	0.815352
			MGI:1913328	Tsen34	0.692916
			MGI:2443607	Rpp38	0.830734
			MGI:3648731	Gm6134	0.748919
			MGI:1096361	Hn1	0.840843
			MGI:894288	Sepp1	0.786412
			MGI:2141656	Gcfc2	0.815179
			MGI:2384584	Rfwd3	0.779086
			MGI:106636	Atp5k	0.782819
			MGI:3036247	Lmtk2	0.849962
			MGI:2139742	AI504432	0.800618
			MGI:1861602	Cpsf4	0.857872
			MGI:1913493	C1galt1c1	0.817349
			MGI:2151797	Tgs1	0.820122
			MGI:1923452	Zdhhc2	0.786639

## Sheet: EMBvsPSG
UPREGULATED			DOWNREGULATED
MGI_ID	Symbol	FoldChange	MGI_ID	Symbol	FoldChange
MGI:1914210	Fam188a	1.16095	MGI:96024	Hbb-bh1	0.0748217
MGI:1310002	Fmo1	1.21837	MGI:101761	Hmga2	0.310484
MGI:1924967	6030408B16Rik	1.23045	MGI:1929751	Asb4	0.334231
MGI:2387586	Tenc1	1.15965	MGI:88491	Crabp2	0.337546
MGI:107417	Slc50a1	1.1935	MGI:104720	Hsd11b2	0.514882
MGI:1917760	Rnf167	1.1229	MGI:96019	Hba-x	0.20447
MGI:109131	Stc1	1.14501	MGI:1918325	Rimklb	0.52408
MGI:2443318	Uap1l1	1.19152	MGI:96170	Hoxa1	0.569666
MGI:88225	C1qc	1.21783	MGI:1888499	Cxcl13	0.316994
MGI:1353510	Arhgef1	1.1576	MGI:96196	Hoxc5	0.623589
MGI:1924378	Crebrf	1.17333	MGI:107928	Aldh1a2	0.559192
MGI:1913447	Cks2	1.36244	MGI:1341793	Pbx2	0.65496
MGI:2142292	Mtmr10	1.13192	MGI:1891740	Dact1	0.47278
MGI:1925751	Itih5	1.14466	MGI:104717	Meis1	0.651407
MGI:2139354	Arfgef2	1.11332	MGI:1341264	Tpbg	0.569767
MGI:90168	Dcaf11	1.14545	MGI:107742	Stra6	0.495684
MGI:2385885	BC028528	1.20727	MGI:97495	Pbx1	0.732288
MGI:98931	Ezr	1.14111	MGI:1100842	Gfra1	0.521819
MGI:1330812	Acox1	1.12455	MGI:2388640	BC005764	0.68886
MGI:2443129	Casc4	1.16653	MGI:98359	Sox11	0.557653
MGI:95524	Fgfr3	1.20574	MGI:1344424	Osr1	0.528593
MGI:1923684	Churc1	1.2371	MGI:2387107	Dusp9	0.668065
MGI:1891445	Peli2	1.21851	MGI:97804	Ptn	0.454328
MGI:2444067	Pqlc3	1.12653	MGI:102657	Cdc34	0.681
MGI:1349919	Ndufb11	1.22751	MGI:97610	Plat	0.631315
MGI:2136741	Pcdhb7	1.20009	MGI:2443349	Parm1	0.559671
MGI:96435	Igf2r	1.20268	MGI:106190	Bcl11a	0.625988
MGI:1927168	Dusp14	1.14922	MGI:87883	Acp5	0.647843
MGI:1860440	Bace2	1.15655	MGI:1345183	Tenm3	0.464647
MGI:104571	Clcn4-2	1.14341	MGI:3584032	Lin28b	0.514465
MGI:1339468	S100a10	1.34495	MGI:96440	Igfbp5	0.565073
MGI:1913860	Abi3	1.17387	MGI:104904	Tead2	0.727752
MGI:2142989	Ncapd3	1.15679	MGI:2685630	Fndc3c1	0.481404
MGI:1860206	Ammecr1	1.19501	MGI:1890500	Mcoln3	0.665558
MGI:3704210	Gm14494	1.27812	MGI:1345148	2016-09-03	0.624923
MGI:892877	Pld2	1.10145	MGI:1914544	Ikbkap	0.727789
MGI:1298206	Pip4k2a	1.17254	MGI:2157785	Peg10	0.514043
MGI:1929938	Perp	1.38741	MGI:2139360	Sall4	0.680568
MGI:1925225	Tmem50b	1.15964	MGI:1890357	Igf2bp1	0.538057
MGI:97513	Furin	1.15059	MGI:1933947	Rtn1	0.648299
MGI:96624	Itpr3	1.14691	MGI:105369	Cbx1	0.760886
MGI:88057	Apoe	1.34657	MGI:105091	E2f5	0.658625
MGI:1929895	Clstn1	1.14116	MGI:1341155	Gldc	0.723415
MGI:3648620	Gm6055	1.38396	MGI:894680	Bach1	0.775222
MGI:97394	Oat	1.17003	MGI:3045253	Scube3	0.722433
MGI:1194899	Inpp5k	1.15136	MGI:3646284	Ighv1-12	0.502579
MGI:1100508	Kcnj8	1.17682	MGI:1344341	Car14	0.582871
MGI:95499	Fcgr2b	1.12777	MGI:1349764	Dpysl4	0.705956
MGI:1349478	Zw10	1.14335	MGI:109450	Frat1	0.722214
MGI:1337026	Sdcbp	1.17984	MGI:95664	Gata4	0.557881
MGI:2443511	Slc9a6	1.15058	MGI:1917705	2610203C20Rik	0.611895
MGI:1343087	Pdk2	1.22611	MGI:1922667	Rspo2	0.559025
MGI:1098267	Ogdh	1.16218	MGI:1919293	Sulf2	0.644573
MGI:3045258	Stard9	1.18683	MGI:1914399	Nkain1	0.702084
MGI:1922937	Fam65a	1.12841	MGI:1913303	Ypel1	0.747732
MGI:1915213	Npc2	1.21755	MGI:104685	Twist2	0.686958
MGI:88608	Cyp2f2	1.38896	MGI:97496	Pbx3	0.701724
MGI:1913462	Sec61b	1.2546	MGI:1345162	Adam23	0.789544
MGI:95665	Gba	1.13376	MGI:87912	Acvr2b	0.7531
MGI:99698	Clock	1.16531	MGI:97380	Ntf3	0.700125
MGI:1919729	Hsdl2	1.23972	MGI:2147003	Arhgap28	0.742537
MGI:106636	Atp5k	1.31618	MGI:108564	Meis2	0.644805
MGI:1923507	Slc38a3	1.12314	MGI:2447063	Tenm4	0.74736
MGI:2442060	Rassf2	1.15865	MGI:103198	Cdc25a	0.759139
MGI:88090	Ass1	1.23977	MGI:96185	Hoxb4	0.714458
MGI:98260	Ccl3	1.30282	MGI:107690	Zfp462	0.671719
MGI:1277124	Asah1	1.30132	MGI:1919725	Ssbp3	0.777854
MGI:1313266	Alcam	1.24083	MGI:1202390	Igdcc3	0.509487
MGI:1343094	Kat2b	1.14678	MGI:1919030	Isyna1	0.718876
MGI:2143526	Gstt3	1.1863	MGI:96184	Hoxb3	0.7291
MGI:1916906	Pir	1.15352	MGI:5453353	Gm23576	0.498999
MGI:1096393	Snai2	1.36429	MGI:892014	Sfrp1	0.607788
MGI:96257	Hspg2	1.24501	MGI:104861	Bcat1	0.562634
MGI:1931054	Slc43a3	1.15826	MGI:104621	Alx1	0.774953
MGI:2676551	Plekhg1	1.14978	MGI:108078	Sfrp2	0.632918
MGI:1914675	Eps8l1	1.12479	MGI:2138563	Sulf1	0.665654
MGI:88351	Cdk1	1.19916	MGI:1890358	Igf2bp2	0.69264
MGI:2444343	Nbeal1	1.26353	MGI:95757	Slc2a3	0.469574
MGI:1914448	Spats2l	1.16277	MGI:3629889	Mir680-3	0.696956
MGI:1201785	Fxyd5	1.18567	MGI:1339968	Cth	0.754115
MGI:1196429	Atg13	1.12092	MGI:1921373	Foxp4	0.719486
MGI:894308	Rab21	1.15834	MGI:1924238	Rdh10	0.658578
MGI:3644742	Gm7618	1.3368	MGI:1890471	Pcbp4	0.720723
MGI:1929511	Ndufa1	1.34894	MGI:1913954	Rbm4b	0.801309
MGI:1920774	1700088E04Rik	1.16869	MGI:1859631	Pdgfc	0.652094
MGI:96646	Jun	1.17685	MGI:2685175	Asxl3	0.732068
MGI:1914466	Mboat2	1.17061	MGI:2443764	Iqcb1	0.727096
MGI:98725	Tgfb1	1.16398	MGI:1316687	Nap1l4	0.852257
MGI:104750	Nrcam	1.21268	MGI:2652891	B4galnt4	0.735237
MGI:4452399	Gm17014	1.35896	MGI:1919201	Gpc2	0.747966
MGI:96820	Lpl	1.427	MGI:96949	Mdk	0.763909
MGI:2442595	Slc36a4	1.15301	MGI:2652875	Wnk3	0.680894
MGI:1917585	Reep6	1.14552	MGI:5453033	Gm23256	0.593773
MGI:1098784	Fam126b	1.16421	MGI:3643526	Gm9034	0.732427
MGI:1921818	Mlkl	1.10201	MGI:5452795	Gm23018	0.61349
MGI:104631	Utrn	1.22849	MGI:1352451	Nr2f1	0.627811
MGI:108174	Prkg1	1.16619	MGI:104748	Peg3	0.681576
MGI:106598	Myo5b	1.14516	MGI:107668	Ifna1	0.730458
MGI:1890077	Foxo1	1.15465	MGI:1347481	Foxc2	0.721193
MGI:2442582	Ablim3	1.22537	MGI:1338042	Pcdh10	0.668978
MGI:98249	Scn3a	1.13313	MGI:1923824	Mfsd2a	0.824822
MGI:1915271	Bphl	1.16213	MGI:108392	Slc20a1	0.780763
MGI:104677	Man1a	1.18545	MGI:2384801	Gps1	0.688212
MGI:1924165	Mnd1	1.29818	MGI:101791	Isl1	0.527673
MGI:2144041	Wsb2	1.17251	MGI:1354946	Mapk6	0.739467
MGI:2388283	Glb1l2	1.16383	MGI:3650332	Gm11402	0.615641
MGI:1913358	Ndufa9	1.22152	MGI:1927070	Dusp10	0.773822
MGI:1915748	Tspan11	1.21897	MGI:3705563	Gm15455	0.711052
MGI:1194490	Diap1	1.15216	MGI:98728	Tgfbr1	0.759888
MGI:895149	Acadvl	1.22745	MGI:1355335	Tmod2	0.83694
MGI:1923155	4930578C19Rik	1.14159	MGI:1919598	Aif1l	0.731639
MGI:3704296	Gm15501	1.50421	MGI:1923615	Tbx18	0.623304
MGI:2385897	Tmem184a	1.16859	MGI:2685112	Gm266	0.791897
MGI:2148896	Palmd	1.17567	MGI:3650447	Gm11800	0.641563
MGI:1298390	Swap70	1.13732	MGI:96159	Hmgcr	0.760448
MGI:104769	Fkbp10	1.18975	MGI:95402	Epb4.2	0.749796
MGI:2142908	Myzap	1.35458	MGI:1888712	Ppbp	0.592996
MGI:95487	Fbln1	1.15569	MGI:1341879	Zim1	0.667765
MGI:1354184	Nox4	1.15842	MGI:97960	Rnps1	0.7581
MGI:2445003	Arhgap1	1.18744	MGI:894762	Ldb1	0.821149
MGI:3603204	Piezo1	1.18993	MGI:5453436	Gm23659	0.698512
MGI:1914361	Naaa	1.18637	MGI:1913869	Atat1	0.790722
MGI:1931437	Smpdl3a	1.21977	MGI:1924384	Hnrnpa0	0.741138
MGI:88222	Tspo	1.2604	MGI:1347466	Foxc1	0.70011
MGI:1914500	Ube2l6	1.32575	MGI:3031205	Olfr1371	0.685438
MGI:2145890	Ano6	1.14377	MGI:2687009	AF067063	0.73469
MGI:99655	Prdm1	1.12368	MGI:2137668	Zfhx4	0.73053
MGI:2446193	Tnks1bp1	1.17033	MGI:103574	Amph	0.74549
MGI:3039562	Taf9b	1.19019	MGI:1277171	Dcx	0.678608
MGI:88470	Comt	1.17741	MGI:1933331	Elovl4	0.738457
MGI:88263	Capn1	1.16575	MGI:97773	Prh1	0.741938
MGI:1929253	Gltp	1.24592	MGI:95522	Fgfr1	0.811764
MGI:108448	Angpt1	1.29755	MGI:102706	Fdft1	0.755234
MGI:1099464	Ssr4	1.23807	MGI:1316738	Igkj5	0.682069
MGI:1341850	Rb1cc1	1.18527	MGI:1202713	Rhag	0.76608
MGI:88111	Atp2b4	1.21066	MGI:1926142	Crispld2	0.75911
MGI:3650260	Gm11531	1.16366	MGI:105381	Rpsa	0.729904
MGI:1918190	Dap	1.26451	MGI:1858510	Nell2	0.679791
MGI:1927152	Syne1	1.12279	MGI:1918580	Rcbtb1	0.768737
MGI:1913339	Rmnd5b	1.15929	MGI:3704118	Gm10318	0.518014
MGI:1858306	Srpx	1.16434	MGI:1097156	Ptgis	0.823756
MGI:1928738	Slc25a20	1.19198	MGI:3704303	Gm10013	0.565105
MGI:102890	Ccng1	1.31461	MGI:1914515	Slc39a10	0.819055
MGI:1921356	Dcaf6	1.15121	MGI:2135283	Igsf9	0.779912
MGI:3840155	Gm16332	1.18582	MGI:1914694	Ilkap	0.836248
MGI:5455608	Gm25831	1.29001	MGI:96027	Hbb-y	0.574274
MGI:98958	Wnt5a	1.2739	MGI:1890222	Midn	0.79498
MGI:3650562	Gm12627	1.36735	MGI:3619354	Mir339	0.683711
MGI:1917665	2610018G03Rik	1.23914	MGI:2444228	Ccar2	0.833799
MGI:1196356	Iqsec1	1.13278	MGI:98218	Prrx2	0.742121
MGI:2153470	Scgb3a2	1.38422	MGI:1860489	Ptbp2	0.736451
MGI:1338798	S100a11	1.37051	MGI:5455982	Gm26205	0.767084
MGI:109611	Dsp	1.40761	MGI:1926810	Tmeff1	0.809053
MGI:1914342	Gatm	1.30091	MGI:105050	Mtf2	0.789124
MGI:1927406	Herpud1	1.20811	MGI:1916804	Klhdc2	0.791211
MGI:1935127	Smarca1	1.2189	MGI:1352760	Hdgfrp3	0.787087
MGI:96836	Lta4h	1.18416	MGI:1914633	2410127L17Rik	0.736689
MGI:1289196	Rnf213	1.17891	MGI:104903	Gpc3	0.837126
MGI:2659071	Rapgef2	1.16042	MGI:1315215	Dhrs3	0.782016
MGI:1916203	Chmp2a	1.18852	MGI:3781485	Gm3307	0.789494
MGI:1918195	Mmrn1	1.34525	MGI:1859854	Rcor2	0.734073
MGI:2446214	Man1c1	1.14973	MGI:2155345	Col26a1	0.724346
MGI:2155278	Sesn1	1.17259	MGI:97357	Mycn	0.722805
MGI:2444188	Dgkh	1.16815	MGI:5453135	Gm23358	0.695544
MGI:1333855	Atox1	1.22049	MGI:3651164	Gm11841	0.837318
MGI:1924307	Ston1	1.17905	MGI:109151	Ltbp1	0.761812
MGI:3697726	Arhgap23	1.15274	MGI:1914057	Tmtc2	0.722382
MGI:108389	Kif4	1.18606	MGI:1261834	Wnt2b	0.721424
MGI:98310	Ski	1.15329	MGI:96183	Hoxb2	0.792589
MGI:2179288	Rttn	1.14905	MGI:5455719	Gm25942	0.633706
MGI:2179722	Rassf3	1.15852	MGI:87983	Alpl	0.852327
MGI:1917278	Dopey2	1.11318	MGI:1915963	Ifitm1	0.760359
MGI:88574	Cybb	1.17283	MGI:1919929	2810055G20Rik	0.717651
MGI:1270840	Ehf	1.13171	MGI:2444710	Prtg	0.778105
MGI:1339963	St3gal5	1.24346	MGI:1926784	Tagln3	0.716867
MGI:1354696	Fbxo8	1.12587	MGI:2385228	Tmem119	0.823367
MGI:1913122	Tmem45a	1.24681	MGI:3629682	Mir680-1	0.545423
MGI:3643105	Gm7079	1.40764	MGI:2135937	Sbk1	0.787856
MGI:2676311	Crybg3	1.22567	MGI:88289	Cbx2	0.796379
MGI:2156367	Tlr3	1.16422	MGI:1920581	1700034P13Rik	0.722946
MGI:1929278	Tmem59	1.19338	MGI:1890359	Igf2bp3	0.761691
MGI:1922169	Slc35f6	1.12513	MGI:1917329	Golm1	0.763514
MGI:894318	Cdk14	1.22385	MGI:2676809	Mir125a	0.780705
MGI:1196625	Fzd1	1.19705	MGI:98277	Epha4	0.748882
MGI:109383	Casp7	1.22263	MGI:1923936	Clip3	0.783539
MGI:2443472	Atf7	1.15511	MGI:98239	Scd1	0.726952
MGI:95768	Gna13	1.14915	MGI:1914004	Foxp1	0.756818
MGI:1889549	Txnip	1.45541	MGI:3629961	Mir680-2	0.569342
MGI:108016	Rad21	1.14114	MGI:106908	Srpk1	0.844052
MGI:2144529	Cnot6	1.13644	MGI:2443297	Ccnj	0.757185
MGI:108466	Ralbp1	1.1329	MGI:1315202	Slit3	0.776885
MGI:95496	Fcer1g	1.20862	MGI:1914784	Ttll4	0.762933
MGI:96073	Hexa	1.16169	MGI:1920960	Tubb2b	0.716811
MGI:1329042	Sgce	1.16852	MGI:95586	Fst	0.825143
MGI:107166	Vipr2	1.22482	MGI:1354159	E2f6	0.824058
MGI:1918084	Spag9	1.19806	MGI:107637	Psmb7	0.837124
MGI:1916776	Fmo2	1.30804	MGI:3590645	B130055M24Rik	0.80993
MGI:106686	Pon3	1.25423	MGI:1261827	Dnmt3a	0.821886
MGI:2444926	Ckap4	1.15703	MGI:2676882	Mir207	0.572241
MGI:106015	Cox7a2l	1.29913	MGI:1858960	Elovl2	0.760861
MGI:109318	Myl6	1.27846	MGI:3704224	Gm9857	0.759402
MGI:1098231	Kif11	1.22982	MGI:2448377	Hist1h2bb	0.672079
MGI:104756	Itga9	1.22669	MGI:2156528	Elovl6	0.768475
MGI:87920	Plin2	1.21994	MGI:3646854	Gm8832	0.647274
MGI:88342	Cd68	1.21798	MGI:3031008	Olfr1174-ps	0.756305
MGI:99180	Zfp36	1.16468	MGI:1313312	Khdrbs3	0.808448
MGI:1925139	Lbh	1.34368	MGI:1346870	Map2k6	0.814528
MGI:108005	Myd88	1.24434	MGI:103307	Cacnb3	0.818812
MGI:1338762	Fhl2	1.53689	MGI:1913484	Sc4mol	0.787432
MGI:1929899	Sqrdl	1.16869	MGI:97857	Rarb	0.768987
MGI:2685357	Layn	1.12934	MGI:3028594	Zfp422-rs1	0.780619
MGI:88208	Bsg	1.14762	MGI:96816	Lor	0.836139
MGI:1914148	Baiap2l1	1.18158	MGI:2147077	Pkdcc	0.76272
MGI:1913633	Iscu	1.26185	MGI:1098269	Kif5c	0.765285
MGI:1915114	Yipf4	1.16758	MGI:88316	Ccne1	0.786176
MGI:108046	Laptm5	1.23386	MGI:1913390	Ska2	0.806577
MGI:1917912	Clic5	1.33723	MGI:3781628	Mpc1-ps	0.626356
MGI:1918000	Kdsr	1.16332	MGI:2142598	Slc7a6	0.821514
MGI:88467	Col1a1	1.43953	MGI:1917708	2610318N02Rik	0.745424
MGI:97397	Opcml	1.42589	MGI:2681164	Plekha8	0.792124
MGI:103178	Vegfa	1.22436	MGI:1919643	Faim2	0.861067
MGI:1861606	Tacstd2	1.17512	MGI:3643695	Gm8055	0.669353
MGI:1920973	Sh3bgrl3	1.20817	MGI:1931838	Dbn1	0.828232
MGI:97293	Nedd1	1.21406	MGI:1914152	Mtap	0.77594
MGI:2685387	Atp13a3	1.23512	MGI:4439575	Trbj1-6	0.678558
MGI:95806	Aes	1.23894	MGI:1349462	Uba7	0.846765
MGI:1914097	Hint3	1.19444	MGI:1913895	Pspc1	0.828591
MGI:97879	Rbp4	1.18278	MGI:95655	Gas1	0.805605
MGI:1889277	Astn2	1.15465	MGI:1915031	Ilf2	0.863106
MGI:107567	Irgm1	1.13489	MGI:3645649	G430049J08Rik	0.51233
MGI:1098729	Emp3	1.3417	MGI:2685177	Megf10	0.825417
MGI:108022	Pkn1	1.17487	MGI:1918252	Mex3b	0.809959
MGI:1923727	Pcolce2	1.1762	MGI:2387642	Cxcl17	0.8591
MGI:1913493	C1galt1c1	1.28911	MGI:1923108	Speer7-ps1	0.594866
MGI:2684924	Pcdh17	1.28838	MGI:102478	mt-Tp	0.620054
MGI:107497	Fxyd3	1.17064	MGI:107435	Cdh6	0.712872
MGI:106912	Emr1	1.16332	MGI:1351637	Peg12	0.834265
MGI:3650235	Gm13080	1.49078	MGI:1914192	Ddx18	0.818572
MGI:1916047	Pdgfrl	1.14806	MGI:3650330	Gm11563	0.701268
MGI:109591	Nfic	1.15589
MGI:2442213	Plekha1	1.14253
MGI:1277151	Snca	1.4454
MGI:1351642	Msrb1	1.21539
MGI:109359	Nek2	1.20625
MGI:1927468	Samhd1	1.16743
MGI:97009	Mmp2	1.21447
MGI:1917816	Abhd17b	1.17747
MGI:1352462	Nr1h3	1.199
MGI:99916	Lamb2	1.20504
MGI:2443191	Nceh1	1.28061
MGI:109628	Dnase1l1	1.1478
MGI:1915091	Atg3	1.21585
MGI:102952	Dgka	1.17218
MGI:2685365	Slc35g2	1.2203
MGI:87989	Alas1	1.17613
MGI:1925044	Adamtsl2	1.18616
MGI:1915842	Syf2	1.16476
MGI:1860764	Pde3a	1.19639
MGI:108405	Apbb2	1.20831
MGI:2444661	4933426M11Rik	1.15532
MGI:1349457	Serinc3	1.22411
MGI:88223	C1qa	1.22506
MGI:109354	Ucp2	1.28391
MGI:1101781	Elf3	1.16446
MGI:1925144	Prickle2	1.20573
MGI:88127	B2m	1.55072
MGI:2138143	AA986860	1.15645
MGI:98759	Tjp1	1.19351
MGI:1337006	Hapln1	1.35353
MGI:1915166	Ppap2b	1.17922
MGI:1916316	1810010H24Rik	1.21254
MGI:99461	Piga	1.23029
MGI:88108	Atp1b1	1.7998
MGI:2386607	Abca5	1.24547
MGI:1929501	Arl6ip5	1.237
MGI:1928396	Pdcd10	1.26043
MGI:1916782	Hopx	1.83312
MGI:1330805	Rab33b	1.19226
MGI:2181621	Aard	1.24138
MGI:109322	Kcnk1	1.31294
MGI:1309516	Tpst2	1.16442
MGI:97372	Npr2	1.17013
MGI:1916528	3110002H16Rik	1.14823
MGI:1919069	Kif23	1.20883
MGI:1920635	Fam177a	1.35856
MGI:1101357	Ece1	1.19376
MGI:103099	Cox6a1	1.27642
MGI:1277980	Fgf18	1.18273
MGI:2140356	H6pd	1.25463
MGI:2385618	Mmrn2	1.21918
MGI:96074	Hexb	1.21946
MGI:96902	Lyz1	1.27181
MGI:104637	Tgfbr3	1.1906
MGI:103151	Pltp	1.30115
MGI:1914783	Ppfibp1	1.15438
MGI:1918770	Grap	1.23031
MGI:1859730	Sh3glb1	1.18096
MGI:1333813	Mbd2	1.1662
MGI:2443687	Arhgap25	1.13158
MGI:1921661	Ppapdc2	1.17081
MGI:2443388	Kdm7a	1.23267
MGI:2444814	Cped1	1.41192
MGI:1350933	Bcap31	1.20284
MGI:1918983	Susd2	1.17187
MGI:1926178	Pigt	1.27892
MGI:2148202	Ces1d	1.35373
MGI:2147592	Lipo1	1.24698
MGI:1924117	Rhbdd1	1.13992
MGI:2137356	Trim16	1.21775
MGI:2685174	9430020K01Rik	1.25926
MGI:1913509	Camk2n1	1.20569
MGI:88385	Cfh	1.41101
MGI:1921802	Nipal3	1.17856
MGI:107927	Rock1	1.2439
MGI:1921288	Brip1os	1.16821
MGI:1333753	Pdcd6ip	1.16692
MGI:88501	Crip1	1.5005
MGI:1201787	Socs2	1.2063
MGI:109320	Mmp15	1.19795
MGI:1277116	Pde8a	1.13088
MGI:1344418	Cib1	1.20448
MGI:1933391	Maged2	1.31473
MGI:1349438	Mprip	1.20347
MGI:2139607	Usp53	1.16103
MGI:1917794	Tmem242	1.23693
MGI:1338788	Pex11a	1.14474
MGI:2144423	Arhgap44	1.16275
MGI:98534	Tcn2	1.22545
MGI:1352759	Rnf11	1.16286
MGI:1097680	C3ar1	1.23143
MGI:2385644	Ms4a6c	1.24705
MGI:1925915	2016-03-02	1.26964
MGI:2384588	Neil3	1.24933
MGI:1921352	Slc35a5	1.19168
MGI:2137648	Ifi30	1.18781
MGI:1914164	Vps28	1.18562
MGI:1095404	Mfng	1.20528
MGI:1927489	Pdlim5	1.57881
MGI:107899	Cd36	2.14974
MGI:1346341	Rnf13	1.19742
MGI:1922038	E2f8	1.19986
MGI:1354702	Fbxl3	1.15238
MGI:2442313	Lrrc1	1.23942
MGI:1889383	Ap1s2	1.20504
MGI:1919028	Klhl5	1.16537
MGI:108470	St6gal1	1.22101
MGI:96551	Il2rg	1.20188
MGI:1338946	Acvrl1	1.33861
MGI:109185	Nov	1.31306
MGI:2385107	Rab7l1	1.16879
MGI:2148019	Jade3	1.18619
MGI:1916372	Ptgr2	1.27174
MGI:87905	Actc1	2.54101
MGI:109442	Itga8	1.27137
MGI:2147716	Slc16a12	1.205
MGI:1306784	Cited2	1.17676
MGI:1890497	Plvap	1.29184
MGI:894315	Rap1b	1.15752
MGI:88554	Ctla2a	1.53215
MGI:103220	Meox1	1.19634
MGI:1201780	Atp6v1a	1.14558
MGI:1859310	Asah2	1.19625
MGI:1342291	Rlim	1.15716
MGI:1330826	Atp9a	1.24167
MGI:107654	Ifngr2	1.28071
MGI:107931	Sqstm1	1.17158
MGI:1927237	Cgn	1.20581
MGI:97388	Nucb1	1.22104
MGI:88381	F3	1.19068
MGI:2145236	Lhfpl2	1.25775
MGI:2441841	Cdc42bpa	1.27064
MGI:97302	Nedd9	1.23315
MGI:1921405	Errfi1	1.22621
MGI:1929744	Cdc42ep2	1.2693
MGI:1332247	Slc33a1	1.21122
MGI:1914071	Bcs1l	1.21634
MGI:1918843	Llgl2	1.21126
MGI:1860604	Gucy1b3	1.27685
MGI:98822	Tfrc	1.22604
MGI:1914421	Dram2	1.28578
MGI:1915268	Col4a3bp	1.21184
MGI:893578	Scarb1	1.17395
MGI:99571	Glp1r	1.42041
MGI:1349645	Islr	1.36104
MGI:2149821	Hsd17b11	1.16121
MGI:1929270	Dstn	1.30737
MGI:2444772	Zhx3	1.16483
MGI:101859	Ccser2	1.22539
MGI:1891259	Lrat	1.42587
MGI:1201681	Dennd5a	1.17212
MGI:1918910	Rarres2	1.37851
MGI:1201689	Tapbp	1.27242
MGI:1920274	Emc7	1.23385
MGI:1098718	Tmem38b	1.15024
MGI:105367	Il4ra	1.24248
MGI:1101353	Klf10	1.15141
MGI:1915274	Hist1h2bc	1.34175
MGI:3028642	Iqgap3	1.19657
MGI:1931526	Hist1h1c	1.24807
MGI:109545	Gpr182	1.28417
MGI:1933209	Tm6sf1	1.31575
MGI:1915670	Ankrd13a	1.30743
MGI:1914698	Plxdc2	1.27084
MGI:104859	Selenbp2	1.38598
MGI:1933754	Nedd4l	1.24796
MGI:95490	Fbn2	1.31972
MGI:3041177	Taok3	1.15071
MGI:2142227	Lrrk1	1.24551
MGI:2156764	Stard4	1.23855
MGI:2444594	Slc26a9	1.21278
MGI:1914719	Abhd5	1.16747
MGI:1916469	Ddah1	1.18248
MGI:1915625	Ndufa8	1.31763
MGI:101781	Sntb1	1.18954
MGI:1924105	Slc17a5	1.17088
MGI:2443513	Arsj	1.20758
MGI:1928144	Plekha2	1.33855
MGI:99946	Creb3	1.21889
MGI:102891	Adcy7	1.1869
MGI:103224	Fdx1	1.22658
MGI:1923294	Ncapg2	1.25127
MGI:2449205	Nr1d2	1.2135
MGI:1347346	Adamts7	1.19684
MGI:1914025	Ptplad2	1.2045
MGI:2444679	Tcp11l2	1.18735
MGI:2141917	Prkd2	1.22003
MGI:1915525	Rpa1	1.22686
MGI:1890216	Slc6a14	1.30946
MGI:2152187	Cyyr1	1.28404
MGI:1097714	Bhlhe40	1.23918
MGI:1352498	Ndrg2	1.69745
MGI:1355323	Slc7a8	1.13663
MGI:95484	Fas	1.16585
MGI:1914179	Asf1b	1.19305
MGI:104565	Cdkn1b	1.24161
MGI:87966	Agtr2	1.35346
MGI:96904	M6pr	1.22545
MGI:107655	Ifngr1	1.22329
MGI:1933820	Jam2	1.20861
MGI:88456	Col4a5	1.15396
MGI:1919531	Sh2d4a	1.27975
MGI:1346518	Scamp2	1.19996
MGI:104873	Aga	1.20104
MGI:103236	Efna1	1.20538
MGI:1861231	Clec4n	1.20751
MGI:1349215	Abcd1	1.19049
MGI:1098243	Ifnar2	1.20122
MGI:2442829	Klhl4	1.49181
MGI:1194500	Ablim1	1.20639
MGI:1340030	Crlf1	1.30116
MGI:2684937	Lclat1	1.28757
MGI:2143990	Parp12	1.22654
MGI:894278	Bche	1.41035
MGI:1338033	Spint1	1.21144
MGI:1352454	Nr4a1	1.19336
MGI:107818	Mrc2	1.24089
MGI:1914596	Daam1	1.22235
MGI:891978	Phyh	1.33569
MGI:1915146	Ccdc80	1.36353
MGI:2446259	Ntm	1.21671
MGI:1270152	Reep5	1.28893
MGI:102519	Cst3	1.33325
MGI:1346086	Aplnr	1.44931
MGI:1918142	Ttll7	1.13764
MGI:2147319	Svil	1.2337
MGI:1919124	2310007B03Rik	1.25067
MGI:2686961	Inpp5a	1.23869
MGI:1355332	Myadm	1.34733
MGI:1098259	Capg	1.22126
MGI:1316658	Cyba	1.39379
MGI:99600	Aldh2	1.3188
MGI:2135589	Clec2d	1.37913
MGI:98179	Rras	1.31539
MGI:1195456	Rnh1	1.2729
MGI:1860611	Pdlim1	1.27353
MGI:101900	Mmp14	1.23203
MGI:2442836	Brip1	1.27792
MGI:2138069	Hmgn3	1.24142
MGI:1914762	Agpat2	1.20427
MGI:2654144	Ercc6l	1.24595
MGI:1914526	Eri1	1.25351
MGI:1298204	Ppt1	1.19275
MGI:1916960	Arap1	1.24747
MGI:95860	Gstm1	1.23442
MGI:1278336	Cdkl5	1.20605
MGI:103559	Sox18	1.26074
MGI:2144765	Pld4	1.1616
MGI:1923505	Pcgf5	1.37682
MGI:2682940	Gxylt2	1.16528
MGI:1343142	Arpc1b	1.32712
MGI:3650036	Gm13244	1.3366
MGI:1913563	Smurf2	1.20321
MGI:96909	Maf	1.25561
MGI:2384850	Pdlim2	1.28568
MGI:1915776	Gpr155	1.16424
MGI:1927222	Diap3	1.3119
MGI:1922925	Mfsd6	1.14366
MGI:1923452	Zdhhc2	1.32907
MGI:106510	Lurap1l	1.26951
MGI:98738	Thbs2	1.45467
MGI:1859650	Ramp2	1.33538
MGI:1921663	Tc2n	1.246
MGI:2441849	Lpp	1.29286
MGI:2175912	Arid5b	1.24498
MGI:1924015	Mlec	1.18617
MGI:1913510	Tmem54	1.25947
MGI:98737	Thbs1	1.47774
MGI:107815	Pfkfb2	1.25158
MGI:1918521	Gca	1.30766
MGI:1922011	Mxra8	1.48756
MGI:108295	Pxn	1.19763
MGI:107187	Bcl6	1.16568
MGI:97142	Mrc1	1.44165
MGI:1261864	Wipi1	1.19342
MGI:2654575	Cybrd1	1.20768
MGI:107941	Emp1	1.39409
MGI:2442082	Tmem30b	1.20831
MGI:1917814	Fam213a	1.35618
MGI:97795	Ptger3	1.23348
MGI:105378	Adam12	1.31022
MGI:107387	Aqp4	1.36606
MGI:97312	Nfkb1	1.22822
MGI:98507	Tcf7	1.25223
MGI:2655562	Eltd1	1.28362
MGI:1345144	Spry4	1.21859
MGI:1349450	Vat1	1.27557
MGI:2449923	Egfl7	1.25098
MGI:2159605	Acot2	1.28195
MGI:96417	Ids	1.19426
MGI:1353652	Tor3a	1.24588
MGI:95285	Edn3	1.22513
MGI:101762	Elk3	1.17197
MGI:2685813	Fam189a2	1.58754
MGI:1914692	Retsat	1.23397
MGI:2444477	Rbms3	1.31118
MGI:1919671	Ttc30b	1.26571
MGI:88031	Anxa7	1.20798
MGI:96777	Lgals1	1.40174
MGI:2384905	Ginm1	1.30589
MGI:1349216	Abcd3	1.18489
MGI:1923714	Casc5	1.30052
MGI:1336186	Agpat3	1.18663
MGI:1341872	Tjp2	1.19433
MGI:106008	Anxa5	1.34114
MGI:104574	Ptprj	1.25804
MGI:1915021	Arpc5	1.25433
MGI:99907	Plod1	1.19559
MGI:1095413	Lfng	1.27204
MGI:1099790	Plk2	1.40733
MGI:1888518	Vav3	1.19761
MGI:1891833	Pfkp	1.73667
MGI:1924730	Kidins220	1.22714
MGI:2136752	Pcdhb16	1.27556
MGI:1099809	Fgf10	1.28108
MGI:1914367	Dynlt3	1.39625
MGI:95558	Flt1	1.20278
MGI:1929214	Ap3m2	1.14722
MGI:107822	Ebp	1.24838
MGI:1915393	Herpud2	1.16903
MGI:1928900	Ehd3	1.21278
MGI:107448	Lyst	1.27583
MGI:97178	Map4	1.17869
MGI:1935151	Klf7	1.21107
MGI:1916111	1190002N15Rik	1.2903
MGI:1925558	Gpr108	1.18756
MGI:2447165	Cmtm6	1.23679
MGI:1096381	Arntl	1.17755
MGI:99682	Tmbim6	1.28348
MGI:96591	Irf2	1.26022
MGI:1924013	Mospd2	1.25468
MGI:98970	Xbp1	1.23897
MGI:1919638	Ripk4	1.18649
MGI:1261872	Wwc2	1.16956
MGI:1859274	Pdlim3	1.51385
MGI:108517	St5	1.19871
MGI:1889844	Sumf1	1.19144
MGI:95593	Fuca1	1.35419
MGI:1354742	Synrg	1.22272
MGI:1919128	Fam83d	1.2094
MGI:2684416	Arap2	1.25114
MGI:1314884	Tnfrsf1a	1.30136
MGI:2181193	Dennd2d	1.18724
MGI:88179	Bmp3	1.1934
MGI:107357	Inpp5d	1.16336
MGI:1927185	Chp1	1.19443
MGI:2146813	Plekhh2	1.32398
MGI:3039591	Mtss1l	1.2624
MGI:2685715	Heca	1.15797
MGI:88453	Col3a1	1.36611
MGI:1931144	Parva	1.20615
MGI:1309992	Cbr3	1.26836
MGI:1916189	Rasl11b	1.34828
MGI:1346876	Map3k5	1.3035
MGI:2385155	Btbd3	1.34125
MGI:1929096	Thsd1	1.2027
MGI:1914510	Cers4	1.26056
MGI:2137237	Fam129a	1.26024
MGI:1891190	Ctsz	1.27062
MGI:2686925	Cyb561a3	1.17871
MGI:1349721	Tob1	1.25007
MGI:2151075	Tnfrsf21	1.29053
MGI:1337120	Slc7a7	1.20018
MGI:1917604	Secisbp2l	1.21453
MGI:1353576	Pik3cg	1.1995
MGI:1914372	Nrarp	1.32786
MGI:1858208	Ech1	1.37144
MGI:1919727	Tmem87b	1.25002
MGI:1201678	Cacna1g	1.26513
MGI:99454	Irs1	1.23759
MGI:2138915	Myl9	1.65965
MGI:104669	Man2a1	1.28281
MGI:1923930	5330417C22Rik	1.26287
MGI:1919238	Esco2	1.29913
MGI:1858961	Prc1	1.22721
MGI:97583	Pik3r1	1.30003
MGI:2685104	Akap5	1.52504
MGI:109347	Lum	1.72353
MGI:1333857	Arhgap31	1.27989
MGI:1336882	Vamp8	1.38225
MGI:1914172	Rras2	1.3085
MGI:2147199	Afap1l1	1.26307
MGI:1354735	Atp11a	1.28927
MGI:1926217	Rnase4	1.29321
MGI:1920932	Acer2	1.3747
MGI:96704	Krt7	1.37106
MGI:2443807	Osbpl8	1.38817
MGI:1914897	4930523C07Rik	1.39153
MGI:1099462	She	1.20445
MGI:95521	Fgf7	1.32352
MGI:3041226	Akip1	1.27481
MGI:2442764	Smtnl2	1.44275
MGI:1858959	Elovl1	1.25426
MGI:1926249	Car5b	1.19267
MGI:1928481	Lgals8	1.20375
MGI:1913397	Necap2	1.27248
MGI:1915587	Crip2	1.77578
MGI:99444	Nrep	1.28936
MGI:2137513	Slc24a3	1.19525
MGI:2685751	Tmem171	1.31942
MGI:1347053	Git2	1.20213
MGI:2446239	Galnt18	1.27821
MGI:2685335	Mctp2	1.19667
MGI:2143103	Ano10	1.20758
MGI:95832	Grn	1.30089
MGI:1277961	Plec	1.31759
MGI:1891827	Gde1	1.28386
MGI:1298382	Plp2	1.31528
MGI:3045246	Arhgef15	1.2025
MGI:1891701	Pxmp4	1.203
MGI:1914413	Ccdc47	1.24599
MGI:3643656	Gm6517	1.28157
MGI:1929763	Cdc42ep1	1.30696
MGI:104875	Ltbr	1.25553
MGI:1341859	Gstz1	1.21576
MGI:1927073	Slc29a1	1.27043
MGI:2139628	Ctso	1.24782
MGI:1352758	Ulk2	1.19407
MGI:1928478	Brinp1	1.33442
MGI:1913361	Tmed3	1.28693
MGI:2154405	Map4k3	1.29616
MGI:98443	Surf1	1.21646
MGI:2683547	Plch1	1.25304
MGI:1338859	P2rx4	1.20261
MGI:1855700	Pcdh12	1.22007
MGI:96394	Icam2	1.31787
MGI:88075	Arsb	1.32598
MGI:1915553	Fam114a1	1.30218
MGI:1914323	Pi4k2b	1.30515
MGI:1928849	Svep1	1.47491
MGI:1202296	Sorl1	1.27036
MGI:99852	Runx1	1.26761
MGI:2685814	Hpse2	1.52891
MGI:1096867	Etv5	1.38808
MGI:1891250	Gprc5a	1.43311
MGI:2443921	Irf2bp2	1.19686
MGI:2442910	Fam129b	1.26294
MGI:2679255	Ssh2	1.28777
MGI:1916524	Ctdspl	1.27577
MGI:1298229	Nid2	1.25201
MGI:1321398	F11r	1.29343
MGI:1920249	Insig2	1.265
MGI:98739	Thbs3	1.21895
MGI:96560	Il6st	1.2815
MGI:1354386	Lats2	1.23578
MGI:2445175	Arhgap20	1.66081
MGI:2685720	Acss3	1.39849
MGI:1915674	Chn1	1.22503
MGI:2139746	Ankrd13c	1.31076
MGI:1916296	Isca1	1.46368
MGI:95851	Gsn	1.57445
MGI:96748	Lamp2	1.37129
MGI:1921506	Cyld	1.26509
MGI:1919711	Prcp	1.38798
MGI:3617840	Cpa2	1.28523
MGI:1914055	Tspan1	1.22331
MGI:1914109	Slc16a9	1.28337
MGI:105100	Ctnnd1	1.2713
MGI:94900	Dlk1	1.53192
MGI:1929600	Pmepa1	1.33365
MGI:1919179	Tmem123	1.23977
MGI:1097711	Degs1	1.25959
MGI:1918781	Piezo2	1.31188
MGI:99603	Smarca2	1.33484
MGI:1916937	Ypel5	1.22665
MGI:102465	Tex2	1.19089
MGI:95515	Fgf1	1.37119
MGI:1098623	Acaa2	1.46471
MGI:1914497	2016-03-02	1.28056
MGI:105923	Ednra	1.46221
MGI:107949	Rhob	1.28557
MGI:109583	Pten	1.21583
MGI:107484	Rgl1	1.2461
MGI:107362	Stxbp3a	1.28029
MGI:894284	Rab12	1.22238
MGI:96628	Jak1	1.21609
MGI:1915982	Lrrc16a	1.26814
MGI:1915508	Fam111a	1.45097
MGI:2682318	Zfp395	1.24408
MGI:1889205	Cpq	1.31526
MGI:2447167	Cmtm8	1.32943
MGI:104978	Cyp7b1	1.47433
MGI:97783	Psap	1.20011
MGI:1339758	Csf1r	1.24704
MGI:2137617	Tinagl1	1.34216
MGI:1922850	Calml4	1.35766
MGI:2181434	Phc3	1.28974
MGI:1921409	Acbd5	1.24878
MGI:2154244	Plxnd1	1.30994
MGI:96391	Ica1	1.35422
MGI:1917153	Rasip1	1.46733
MGI:97801	Pth1r	1.41811
MGI:1916264	Tnik	1.21113
MGI:1915909	Fam198b	1.51137
MGI:108563	Sirpa	1.22653
MGI:1352502	Limd1	1.20981
MGI:2442551	Lactb2	1.29655
MGI:109613	Matn2	1.36958
MGI:97595	Prkca	1.24436
MGI:2155705	P2ry14	1.44793
MGI:2442192	Eea1	1.33599
MGI:109169	Epas1	1.38982
MGI:106603	Serpinb9	1.39869
MGI:1918876	Gimap6	1.40591
MGI:2441982	Aldh5a1	1.22803
MGI:2141353	Lrrc8b	1.24776
MGI:2146854	Itfg3	1.27044
MGI:106653	Epcam	1.46464
MGI:1919196	Endod1	1.20559
MGI:1918788	Fbxo9	1.20913
MGI:1917818	Cpne3	1.22588
MGI:1859284	Cldn6	1.41857
MGI:1931139	Ppp1r14a	1.5228
MGI:2147570	Marveld1	1.26152
MGI:96745	Lamp1	1.29169
MGI:1913975	Lrrk2	1.28871
MGI:2146009	Dennd3	1.21363
MGI:1309999	Prkx	1.19301
MGI:1890645	Nek7	1.24517
MGI:107926	Rock2	1.34098
MGI:2443086	Fam63b	1.24266
MGI:96432	Igf1	1.39005
MGI:2140279	Tdrd7	1.25744
MGI:1335079	Elf5	1.37027
MGI:106096	Loxl1	1.32663
MGI:96789	Lipa	1.26646
MGI:2141207	Kctd10	1.25901
MGI:97570	Abcb1a	1.28818
MGI:1858500	Diap2	1.4498
MGI:1914979	Mansc1	1.25326
MGI:109496	Lgals9	1.29139
MGI:3606159	Tmem243	1.38845
MGI:1329025	Edil3	1.25032
MGI:1333782	Pld3	1.21743
MGI:2443787	Rnf152	1.25169
MGI:95904	H2-K1	1.29695
MGI:95523	Fgfr2	1.33903
MGI:1923385	Prex2	1.34432
MGI:1099832	Tln1	1.30736
MGI:88451	Col18a1	1.37429
MGI:2146320	Dock10	1.2987
MGI:1920174	Anln	1.23569
MGI:2388479	Ppp2r5a	1.28215
MGI:2443510	Tacc1	1.20831
MGI:1914121	Cpne8	1.23012
MGI:2443538	Msrb3	1.30415
MGI:2661187	Synm	1.28039
MGI:1858210	Stx7	1.26717
MGI:1314882	Hipk3	1.37718
MGI:2385920	Dip2a	1.2158
MGI:102683	Grb7	1.32393
MGI:1923387	Mcur1	1.2594
MGI:1341847	Hhip	1.45734
MGI:1924100	Ago4	1.21054
MGI:3643092	Neurl1b	1.26974
MGI:1341265	Camk2d	1.48768
MGI:1931551	Rhoj	1.2674
MGI:1918320	Mbip	1.41303
MGI:96623	Itpr1	1.26663
MGI:1917650	Adamdec1	1.55253
MGI:2157091	Ttyh2	1.28318
MGI:893592	Ager	1.71907
MGI:1349396	Acot1	1.41984
MGI:1924143	Cers2	1.21924
MGI:1860303	Grasp	1.28719
MGI:108559	Macf1	1.44036
MGI:2441659	Lamp3	1.33554
MGI:99529	Cd63	1.48541
MGI:2679008	Fhod1	1.36396
MGI:1353586	Lmo7	1.95448
MGI:1315211	Lpcat3	1.19182
MGI:1346091	Fbln5	2.07015
MGI:1915097	Sncaip	1.3687
MGI:102797	Acsl1	1.33473
MGI:1340042	Scml2	1.29823
MGI:3698178	Fam174b	1.28578
MGI:103300	Rbl1	1.24843
MGI:104799	Pea15a	1.28424
MGI:2145953	Kdelr3	1.59085
MGI:1860511	Heyl	1.27094
MGI:1329004	Slfn5	1.3036
MGI:1916882	Arhgef12	1.25681
MGI:88557	Pcyt1a	1.22316
MGI:1354952	Dkk3	1.40799
MGI:103063	Stat1	1.30425
MGI:88613	Cyr61	1.28923
MGI:2684938	Prdm6	1.41549
MGI:104809	Pls1	1.24996
MGI:1349480	Scamp1	1.20165
MGI:2656973	Dtx3l	1.27491
MGI:1351614	Gyg	1.53939
MGI:1913945	Aspn	1.75506
MGI:3652053	Gm13889	1.77111
MGI:98325	Smpd1	1.23095
MGI:1926321	Postn	2.15979
MGI:96240	Hspb1	2.57452
MGI:1924311	4931406P16Rik	1.28649
MGI:104979	Cnn1	1.59999
MGI:1344426	Esyt1	1.30273
MGI:1919210	Myh14	1.40823
MGI:107717	Myh9	1.35142
MGI:1919150	Tmem106b	1.21367
MGI:1914291	Oxct1	1.2767
MGI:98753	Timp2	1.27656
MGI:1339467	S100a6	1.46844
MGI:2443100	Bend7	1.27928
MGI:96825	Selenbp1	1.36961
MGI:1261783	Fam49a	1.31686
MGI:1918903	4930506M07Rik	1.2365
MGI:98731	Tgm2	1.64229
MGI:1916042	Srpx2	1.35877
MGI:1925860	Uvrag	1.23009
MGI:102897	Pcsk6	1.54105
MGI:88176	Bmp1	1.39594
MGI:95283	Edn1	1.2817
MGI:1929480	Lrp10	1.26659
MGI:1917777	Stambp	1.21573
MGI:102720	Ednrb	1.3839
MGI:96705	Krt8	1.59509
MGI:1917673	Tspan15	1.44856
MGI:108067	Nkx2-1	1.4105
MGI:1339941	Cxcl15	1.64726
MGI:109368	Gimap1	1.28327
MGI:1915115	Rgs10	1.33611
MGI:1858179	Nucb2	1.32855
MGI:108077	Nptn	1.29531
MGI:1890110	Robo2	1.459
MGI:108520	Fzd4	1.33935
MGI:1916157	Gpr153	1.38969
MGI:2387123	Lnpep	1.47617
MGI:1921479	Paqr8	1.19371
MGI:2182928	Gpr116	1.45841
MGI:107164	Ppp3ca	1.26066
MGI:1915077	Aldh6a1	1.31295
MGI:103013	Cacna1c	1.399
MGI:1316648	Ahnak	1.37022
MGI:1338881	St14	1.38996
MGI:2387639	Fkbp14	1.30844
MGI:2384841	Chpt1	1.24182
MGI:1918448	Otud1	1.28911
MGI:1924696	Heg1	1.29476
MGI:98810	Tpm2	1.34123
MGI:1329016	Sel1l	1.29951
MGI:107741	Pvr	1.27096
MGI:105052	Il13ra1	1.4884
MGI:98373	Sparc	1.36091
MGI:1346859	Mapk3	1.34142
MGI:107543	Sox17	1.25687
MGI:2147914	Nxt2	1.30294
MGI:1202715	Tcf21	1.41405
MGI:1931322	Car13	1.27756
MGI:97363	Notch1	1.40898
MGI:1926157	Atf6	1.24914
MGI:105382	Lama5	1.50071
MGI:894688	Serpinb6b	1.3668
MGI:5474852	Hbb-bs	2.44624
MGI:1353623	Rnf19a	1.22915
MGI:1195462	Gfra2	1.58642
MGI:2444583	Abi3bp	1.65907
MGI:101924	Slc12a2	1.37242
MGI:2147274	Arap3	1.39931
MGI:96163	Hmox1	1.95866
MGI:1921575	Cltb	1.38121
MGI:1918395	Scara5	1.29778
MGI:103241	Slk	1.29584
MGI:95275	Ebf1	1.43127
MGI:1891457	Polh	1.37438
MGI:2135760	Sgpp1	1.386
MGI:1914344	Abhd2	1.43087
MGI:1929076	Htra1	1.60063
MGI:104651	Cd82	1.45667
MGI:1921895	Fam46c	1.61691
MGI:99478	Cckar	1.65934
MGI:2178742	Stab1	1.38029
MGI:2661416	Snx13	1.35062
MGI:106402	Tmem30a	1.32066
MGI:96650	Jup	1.36916
MGI:103123	Serpinb6a	1.41346
MGI:1329044	Cldn3	1.48302
MGI:2384791	Slc26a7	1.51686
MGI:107728	Myo1d	1.31142
MGI:2444151	Clec1a	1.35348
MGI:1915882	Myct1	1.31816
MGI:2685325	Hspb6	1.36235
MGI:87890	Chrnb1	1.22346
MGI:88373	Cebpb	1.39416
MGI:96788	Lifr	1.38311
MGI:1891160	Chst2	1.41916
MGI:1890081	Foxo3	1.2347
MGI:107672	Gpm6b	1.53412
MGI:109629	Atp6ap1	1.24538
MGI:1913536	Sec11c	1.30858
MGI:5477374	Gm26880	1.45107
MGI:1355315	Tmod3	1.3163
MGI:104744	Kcnj2	1.38239
MGI:1098236	Cast	1.36748
MGI:103035	Stat5b	1.23169
MGI:2444947	Mical2	1.48546
MGI:102793	Fstl1	1.34512
MGI:98727	Tgfb3	1.6003
MGI:88255	Anxa6	1.49449
MGI:1925752	Tmem159	1.33284
MGI:99959	Tgfbi	1.4609
MGI:1919619	Ehd4	1.52046
MGI:1924661	Esrp2	1.3731
MGI:2385825	Plekhb2	1.34156
MGI:109585	Pld1	1.28787
MGI:1929940	Bcam	1.67966
MGI:2153044	Elmo1	1.48618
MGI:1338076	Hivep2	1.28783
MGI:108074	Sptlc2	1.24419
MGI:107494	Myl12b	1.33997
MGI:107414	Tnfsf10	1.79116
MGI:1913359	Tspan13	1.37056
MGI:104583	Eps15	1.32971
MGI:98742	Thra	1.36386
MGI:2444800	Prss35	1.65428
MGI:96602	Itga3	1.40824
MGI:108110	Sparcl1	1.58785
MGI:88293	Cacna1d	1.43329
MGI:1913646	Ccdc82	1.36431
MGI:1932576	Akap12	1.33545
MGI:1914705	Klhl13	1.50102
MGI:1913850	Mgst1	1.70532
MGI:101780	Serpine2	1.60137
MGI:1914103	Pnpla2	1.22105
MGI:97769	Prnp	1.382
MGI:95411	Erbb3	1.40444
MGI:88246	Anxa2	1.65931
MGI:1916377	Ociad2	1.54797
MGI:99532	Mef2a	1.41474
MGI:101922	Tnc	2.00127
MGI:1916320	Adamts9	1.47918
MGI:1917745	Atp6ap2	1.29722
MGI:98386	Sptan1	1.35862
MGI:1859606	Wdr45	1.31282
MGI:1096398	Cd81	1.30944
MGI:1353635	Lmcd1	1.28683
MGI:95537	Ctgf	1.41541
MGI:700012	Ostf1	1.335
MGI:99254	Etv1	1.4214
MGI:1101355	Ltbp3	1.47944
MGI:104581	Gnb4	1.31369
MGI:1298407	Tspan7	1.35004
MGI:1330284	Slc16a7	1.27457
MGI:1859353	Mkrn1	1.44388
MGI:97043	Me1	1.47832
MGI:1913107	Il1rl2	1.45182
MGI:107381	Epha1	1.35239
MGI:96897	Lyz2	2.17063
MGI:1328324	Syngr2	1.31579
MGI:2146046	Adamts12	1.37186
MGI:2442866	Zbtb38	1.3132
MGI:1347479	Foxf2	1.69634
MGI:103188	Nfib	1.65301
MGI:87909	Acta2	1.92317
MGI:1309517	Itm2b	1.49021
MGI:88017	Mat1a	1.29135
MGI:1277150	Ldlrad4	1.38654
MGI:2143362	Zfp809	1.33109
MGI:894695	Galnt3	1.38452
MGI:103180	Tcf19	1.36801
MGI:1859285	Cldn7	1.39162
MGI:2444049	P4ha3	1.43695
MGI:1913391	Ifitm3	1.61333
MGI:1921761	Lrrc17	1.5814
MGI:2183102	Sardh	1.52433
MGI:1925868	Acap2	1.30775
MGI:1351617	Abca3	1.57729
MGI:1919131	Apmap	1.33078
MGI:95403	Stom	1.38702
MGI:1916910	Tmbim1	1.48432
MGI:1338031	Spint2	1.42864
MGI:97751	Ppic	1.40691
MGI:1261845	Esyt2	1.31549
MGI:99510	Tmsb4x	1.57278
MGI:103576	Ccl11	1.82778
MGI:2388073	Camk1g	1.34353
MGI:2384294	Rbm47	1.41342
MGI:1352630	Abcc9	1.83237
MGI:98736	Thbd	1.79163
MGI:1921395	F13a1	1.59531
MGI:2148811	Npnt	1.64059
MGI:96617	Cd47	1.44067
MGI:1928009	Vsig2	1.54963
MGI:109528	Trpc1	1.31412
MGI:98852	Tst	1.3898
MGI:105377	Adam19	1.25337
MGI:95489	Fbn1	1.52256
MGI:1920930	Zbtb8a	1.36848
MGI:88930	Reep3	1.27652
MGI:1924558	Tspan9	1.31795
MGI:2142610	Snx25	1.33694
MGI:2442894	Cobll1	1.30613
MGI:1330838	Lgmn	1.41716
MGI:1197013	Rasa3	1.39882
MGI:102853	Elk4	1.36423
MGI:105941	Mpp1	1.48572
MGI:2386796	Abca9	1.76671
MGI:1338015	Sort1	1.47922
MGI:95704	Ggta1	1.34037
MGI:107776	Gadd45b	1.45975
MGI:107489	Phex	1.42396
MGI:1925179	Yipf6	1.30972
MGI:2443818	Arhgap29	1.46909
MGI:1858203	Rab25	1.39511
MGI:1915026	Vwa5a	1.35255
MGI:1354727	Smtn	1.37166
MGI:1915789	Tmem109	1.36689
MGI:1919272	Slc35f2	1.36048
MGI:1918918	Atraid	1.40157
MGI:107285	Ctsh	2.15944
MGI:1315205	Slit2	1.91532
MGI:1915802	Smim14	1.29564
MGI:1340051	Gpr56	1.40275
MGI:894644	Cacnb2	1.45526
MGI:2442485	Myo5c	1.57844
MGI:97528	Pdgfb	1.40552
MGI:1922996	Morc4	1.38256
MGI:2388637	Wwc1	1.40517
MGI:2448556	Stard8	1.27697
MGI:96545	Il1r1	1.3632
MGI:105080	Tgoln1	1.33573
MGI:1353624	Apln	1.33303
MGI:88269	Car2	1.82799
MGI:88561	Ctsb	1.37016
MGI:1861441	Rab27a	1.23932
MGI:104678	Tm4sf1	1.81283
MGI:1914877	Olfml3	2.00201
MGI:1096355	S1pr1	1.6051
MGI:5474850	Hbb-bt	7.21499
MGI:1859665	Atp8b1	1.36464
MGI:2145597	Mbnl2	1.42408
MGI:1338049	Itsn2	1.34577
MGI:1915201	Tubb6	1.41619
MGI:2384307	Rassf9	1.46899
MGI:2183441	Psat1	1.58191
MGI:95415	Erg	1.36582
MGI:1915110	S100a16	1.57309
MGI:1916865	Rab15	1.46592
MGI:1934659	Pi15	1.57239
MGI:1920382	Slc25a16	1.32474
MGI:1890127	Plxnc1	1.37789
MGI:1913625	Dhrs7	1.62282
MGI:1277114	Ptgfrn	1.2828
MGI:1352480	Igfbp7	1.70271
MGI:3026880	Fam124b	1.35163
MGI:104589	Actg2	1.93138
MGI:2446136	Arrdc1	1.41162
MGI:1923422	Prkcdbp	1.56596
MGI:95525	Fgfr4	1.63209
MGI:109610	Enc1	1.53274
MGI:2443496	Sertad4	1.34995
MGI:1915905	Fndc1	1.52536
MGI:88264	Capn2	1.31452
MGI:1346318	Klf6	1.34254
MGI:109380	Il10rb	1.47896
MGI:88329	Cd34	1.55429
MGI:2442366	Peak1	1.45407
MGI:1924840	Chst15	1.44967
MGI:2681008	Cers3	1.40986
MGI:2140592	Slc44a1	1.47243
MGI:1355324	Grb14	1.35645
MGI:1919810	Naalad2	1.2661
MGI:94873	Pcbd1	1.39667
MGI:103034	Stat6	1.32197
MGI:104808	Lcp1	1.44284
MGI:1916060	Nexn	2.03086
MGI:1919051	Plekhf2	1.33963
MGI:96610	Itgb1	1.27846
MGI:1923392	Ppp1r14c	3.18486
MGI:1918034	Rasl12	1.47713
MGI:1196458	Scarb2	1.28055
MGI:105085	Rbl2	1.37065
MGI:2384918	Tspan8	2.53993
MGI:1919129	Acsl5	1.47299
MGI:1261768	Stbd1	1.38541
MGI:1344407	Zeb2	1.59492
MGI:96677	Kit	1.54864
MGI:1261423	Casp8	1.48707
MGI:106183	Ocln	1.44668
MGI:99906	Tie1	1.49019
MGI:2387661	Sema6d	1.39083
MGI:2141669	Eogt	1.52765
MGI:1195966	Ctnnd2	1.49152
MGI:1917326	Esrp1	1.53312
MGI:106206	Nrp1	1.5083
MGI:2443963	Cadps2	1.38385
MGI:88158	Bgn	1.95422
MGI:2442784	Slco4c1	1.64411
MGI:96892	Lyn	1.69289
MGI:2143267	Plscr4	1.41076
MGI:108412	Ppap2a	1.59378
MGI:97631	Pmp22	1.91992
MGI:1918077	Trak2	1.31462
MGI:3588195	Adamts17	1.36595
MGI:1916348	Tmem176b	1.63309
MGI:3028579	Rasgrp3	1.50113
MGI:96683	Kdr	1.37475
MGI:107373	Dnajc3	1.3355
MGI:1914266	Tbc1d2b	1.58201
MGI:1923481	Igsf10	1.53608
MGI:106671	Cdh16	1.51799
MGI:95278	Epha2	1.35219
MGI:109235	Itpkb	1.36901
MGI:98388	Sptbn1	1.45528
MGI:1890457	Slc15a2	1.93948
MGI:2686394	Nckap5	1.51734
MGI:1098726	Emp2	2.15416
MGI:104803	Siae	1.41761
MGI:1924488	Nipal2	1.29352
MGI:97600	Prkch	1.37474
MGI:96969	Met	1.73875
MGI:1924270	Atl3	1.43754
MGI:2384860	Slc44a3	1.4794
MGI:1891125	Kcne4	1.4636
MGI:88496	Crh	1.46678
MGI:104552	Tns1	1.44212
MGI:1336199	Ppp1r13b	1.48011
MGI:2148066	Slc38a5	1.80573
MGI:88388	Cftr	1.81906
MGI:1916858	Sec24d	1.40435
MGI:108056	Nfia	1.58779
MGI:894288	Sepp1	1.63587
MGI:1914951	Wfdc2	1.78656
MGI:1278332	Bcl6b	1.43531
MGI:87866	Acadl	1.86901
MGI:107474	Cd38	1.33965
MGI:1098271	Rgs2	1.50256
MGI:108081	Sypl	1.35541
MGI:107671	Gpm6a	1.82295
MGI:1346321	Adamts5	1.52682
MGI:98935	Vldlr	2.14293
MGI:1923810	Prss8	1.63005
MGI:106687	Pon2	1.42666
MGI:1913464	Rgcc	1.44659
MGI:1917649	Wwtr1	1.40684
MGI:1342276	Mfap4	1.85492
MGI:96817	Lox	2.18658
MGI:107564	Nab1	1.39843
MGI:102784	Tgfb1i1	1.65063
MGI:104695	Scnn1g	1.45318
MGI:103017	Fcgrt	1.68464
MGI:1919164	Antxr2	1.50574
MGI:1276523	Ncoa1	1.45901
MGI:106645	Enpep	2.30737
MGI:97527	Pdgfa	1.30817
MGI:96794	Lmna	1.42673
MGI:105937	Cfi	1.73209
MGI:2386846	Abca8a	1.87381
MGI:2384818	Mtss1	1.3412
MGI:99914	Lamc1	1.56997
MGI:1330848	Atp8a1	1.77647
MGI:87870	Acat1	1.59433
MGI:1933403	Erap1	1.54909
MGI:2442963	Ism1	1.88431
MGI:1926002	Csgalnact2	1.38837
MGI:96974	Kitl	1.76361
MGI:97797	Ptgs1	1.6047
MGI:1923765	Kdelc2	1.5041
MGI:1915291	Mid1ip1	1.50828
MGI:1933830	Enpp5	1.50685
MGI:109162	Gpam	1.48418
MGI:1916774	Esam	1.61642
MGI:3036230	Slc27a6	3.18125
MGI:109278	Ogn	2.45013
MGI:2148050	C77370	1.51407
MGI:107265	Cpd	1.46522
MGI:3039635	Tmem204	1.64024
MGI:1891221	Crtap	1.4494
MGI:1916788	Antxr1	1.49811
MGI:1919683	Rab38	1.5886
MGI:2442474	Dgkb	1.47473
MGI:1918962	Dram1	2.21599
MGI:2177268	Ppp1r3b	1.52419
MGI:1336166	Cflar	1.36522
MGI:1915138	Tmem100	1.76419
MGI:2444110	Sgms1	1.3959
MGI:109517	Sftpc	8.10766
MGI:2442858	Ddx58	1.36298
MGI:2684993	Cytl1	2.88705
MGI:1928482	Mbnl1	1.53292
MGI:101864	Dag1	1.46807
MGI:88253	Car8	1.74999
MGI:1321390	Enpp2	1.75931
MGI:2444633	Vstm4	1.8531
MGI:88059	App	1.3841
MGI:1926259	Iigp1	1.99306
MGI:1346021	Slco2a1	1.56135
MGI:88047	Aplp2	1.46338
MGI:1321395	Ltbp4	1.83868
MGI:105376	Adam9	1.36444
MGI:1914098	Fuca2	1.51889
MGI:88454	Col4a1	1.6341
MGI:95392	Eng	1.56745
MGI:894806	Mylk	1.92288
MGI:104783	Atxn1	1.43475
MGI:1336194	Tpp1	1.31798
MGI:2146607	Clic6	1.43507
MGI:104741	Nfkbia	1.39864
MGI:1921394	Robo4	1.31471
MGI:98927	Vcl	1.4288
MGI:106664	Cd93	1.77194
MGI:1915254	Tmem9b	1.36006
MGI:98664	Tek	1.64159
MGI:103040	Rsu1	1.32236
MGI:1913557	Isoc1	1.55867
MGI:2142572	Mtus1	1.71835
MGI:1289160	Mpzl2	1.49647
MGI:1277968	Ptrf	1.92738
MGI:97342	Nid1	1.69244
MGI:107180	Elf1	1.452
MGI:95660	Gas6	2.01181
MGI:1306799	D17H6S56E-5	1.63869
MGI:1891716	Emcn	1.6352
MGI:2145637	Mtmr6	1.36852
MGI:103201	Aqp1	1.708
MGI:2146021	Mal2	2.0946
MGI:99909	Lama3	1.79701
MGI:96615	Itgb6	1.5707
MGI:1347354	Homer2	1.50146
MGI:2445221	Cd109	1.58661
MGI:2384789	Tmem63a	1.35406
MGI:106612	Myo1c	1.48679
MGI:1277991	Dach1	1.58549
MGI:99915	Lamb3	1.49588
MGI:106012	Tagln	1.71868
MGI:1914135	Acadsb	1.87085
MGI:2182619	Lgi3	2.12707
MGI:3512628	Cbx6	1.70621
MGI:1920591	Arhgef6	1.39931
MGI:97371	Npr1	1.49239
MGI:2444667	Kctd12b	1.41788
MGI:1919257	Fndc3b	1.50059
MGI:1923691	Daam2	1.5981
MGI:2445082	Pamr1	1.51658
MGI:1914856	Fibin	1.84285
MGI:94872	Dcn	2.45214
MGI:2152907	Colec12	1.80068
MGI:105043	Ahr	1.90775
MGI:103038	Stat3	1.38424
MGI:1921160	Arhgap18	1.72939
MGI:2444912	Mbnl3	1.57792
MGI:95705	B4galt1	1.43329
MGI:102749	Trim25	1.49132
MGI:1195263	Lims1	1.37387
MGI:1353452	Aldh3a2	1.41943
MGI:96599	Itga1	1.99248
MGI:1095733	Pros1	1.62875
MGI:1858599	Egfl6	2.25148
MGI:1270156	2016-09-04	1.72218
MGI:2147658	Afap1l2	1.46299
MGI:97756	Srgn	2.27968
MGI:1347095	Cd97	1.96702
MGI:108384	Btg2	1.62713
MGI:95317	Eln	3.55546
MGI:97231	Muc1	2.86333
MGI:2385001	Fermt2	1.38332
MGI:97311	Nfix	2.36086
MGI:1921809	Elovl7	1.53517
MGI:96743	Lamb1	1.44821
MGI:102694	Ptprm	1.65595
MGI:1923484	Magi3	1.49209
MGI:1321385	Entpd5	1.38698
MGI:1913308	Tmem176a	1.61815
MGI:2151110	Prelp	2.00104
MGI:108104	Snrk	1.37123
MGI:1346042	Mgll	1.65736
MGI:1918780	Gas2l3	1.4861
MGI:88348	Cd9	1.77095
MGI:99676	Adcy2	1.94708
MGI:1347050	Aldh1a7	3.78605
MGI:1889842	Fam13a	1.51759
MGI:108420	Nfe2l2	1.5563
MGI:102643	Myh11	2.60797
MGI:2670972	Frem1	2.35375
MGI:2685214	Prrg3	1.50309
MGI:88455	Col4a2	1.71329
MGI:2385331	Stard13	1.52823
MGI:97167	Msn	1.46244
MGI:1349656	Gimap4	1.89816
MGI:97855	Rap2a	1.61401
MGI:2140839	Lrrc8c	1.54066
MGI:1922647	Arhgap24	1.47821
MGI:2384718	Cdc42ep3	1.62983
MGI:88423	Clu	2.45202
MGI:1923811	Snx7	1.83638
MGI:94919	Dpp4	1.95857
MGI:2442354	Csgalnact1	1.43772
MGI:96916	Maob	1.92719
MGI:2684977	Cym	4.9685
MGI:105057	Cdh5	1.88487
MGI:1344333	Mid2	1.84175
MGI:1312985	Tagln2	1.73877
MGI:97809	Ptprb	1.68514
MGI:2443258	Zak	1.49954
MGI:1928740	Fads3	1.78746
MGI:1913101	Cldn10	2.0416
MGI:1341272	Col14a1	1.9983
MGI:1098296	Cpt1a	1.57541
MGI:88338	Cd44	1.56127
MGI:96600	Itga2	1.71606
MGI:98729	Tgfbr2	1.62858
MGI:107571	Cav2	1.92134
MGI:1196990	Cd200	1.6336
MGI:2142149	Ano1	1.76366
MGI:1918101	Tbc1d8b	1.78153
MGI:891999	Adarb1	1.70312
MGI:1298387	Fhl1	2.56485
MGI:109553	Ctsc	1.84073
MGI:96605	Itga6	1.82667
MGI:102709	Cav1	2.49445
MGI:1352757	Iqgap1	1.74551
MGI:1315204	Slc40a1	2.20197
MGI:2444365	Rapgef5	1.65794
MGI:97829	Pygl	1.64264
MGI:103219	Meox2	2.44308
MGI:88181	Bmp5	2.08325
MGI:1098260	Kif1c	1.35807
MGI:105388	Cdkn2c	1.52268
MGI:1349164	Sdc4	1.85383
MGI:96693	Krt19	2.20382
MGI:3026924	Fam84b	1.73743
MGI:88354	Cdh1	1.98806
MGI:108474	Fzd6	1.52376
MGI:95824	Nr3c1	1.92386
MGI:88549	Csrp1	2.05475
MGI:88461	Col6a3	2.96951
MGI:2685362	Fam83b	1.67464
MGI:1933966	Mcam	1.96271
MGI:106621	Myo1e	1.67835
MGI:1195463	Mr1	1.96411
MGI:99913	Lamc2	2.10883
MGI:102805	Entpd1	2.03316
MGI:1349477	Tinag	2.8403
MGI:1932288	Egln3	1.68519
MGI:1340034	Sema3e	2.14854
MGI:96819	Anxa1	3.92782
MGI:1328364	Fmod	3.19849
MGI:2154274	Ehd2	2.24915
MGI:102965	Scn7a	5.54061
MGI:88030	Anxa4	2.0492
MGI:97537	Pecam1	1.95407
MGI:1858229	Ppp1r3c	3.07699
MGI:88459	Col6a1	2.49772
MGI:1914114	Clec14a	1.78532
MGI:109321	Lama4	2.22395
MGI:2136348	Lyve1	2.34327
MGI:1353450	Aldh1a1	2.65294
MGI:88460	Col6a2	2.26768
MGI:99513	Sdpr	3.26184
MGI:108037	Figf	4.48937
MGI:98926	Vcam1	2.45352
MGI:1929209	Cldn18	3.80431
MGI:1916151	Gpr126	2.90047
MGI:104785	Myo6	2.45432
MGI:104902	Gpc4	2.17286
MGI:1915419	Ndnf	2.57089
MGI:87921	Adh1	7.01627

## Sheet: PSGvsCAN
UPREGULATED			DOWNREGULATED
MGI_ID	Symbol	FoldChange	MGI_ID	Symbol	FoldChange
MGI:2683546	Ssh3	1.19889	MGI:96027	Hbb-y	0.0432673
MGI:1344402	Sigirr	1.20327	MGI:96019	Hba-x	0.262513
MGI:1921507	Tspan17	1.2065	MGI:3763743	Snhg1	0.432469
MGI:1346518	Scamp2	1.21866	MGI:2157785	Peg10	0.432876
MGI:2144164	Tbc1d10a	1.21963	MGI:97804	Ptn	0.437048
MGI:1913401	Prr13	1.22061	MGI:104861	Bcat1	0.442209
MGI:1333882	Adam15	1.22074	MGI:1922667	Rspo2	0.449847
MGI:97783	Psap	1.22213	MGI:5453232	Gm23455	0.4656
MGI:104684	Eps8	1.22216	MGI:5455568	Gm25791	0.473018
MGI:109628	Dnase1l1	1.22238	MGI:2685630	Fndc3c1	0.482953
MGI:1352504	Hip1r	1.22591	MGI:95557	Flnc	0.491789
MGI:1309516	Tpst2	1.22596	MGI:1918325	Rimklb	0.497632
MGI:97527	Pdgfa	1.22667	MGI:2443198	Slitrk6	0.502762
MGI:1343094	Kat2b	1.22696	MGI:5452397	Gm22620	0.50623
MGI:2678949	Sh3tc1	1.22843	MGI:109347	Lum	0.516651
MGI:1341839	Nod1	1.22929	MGI:1351326	Nrk	0.516966
MGI:1914979	Mansc1	1.23025	MGI:5454134	Gm24357	0.522896
MGI:1333782	Pld3	1.23139	MGI:1914399	Nkain1	0.522985
MGI:1921818	Mlkl	1.23439	MGI:102482	mt-Tl1	0.531361
MGI:1354696	Fbxo8	1.23448	MGI:2156528	Elovl6	0.536016
MGI:2448556	Stard8	1.23508	MGI:1202065	Chek1	0.540097
MGI:1298407	Tspan7	1.23574	MGI:1860489	Ptbp2	0.542031
MGI:1927594	Itm2c	1.23779	MGI:892014	Sfrp1	0.544856
MGI:98483	Tap1	1.23799	MGI:107821	Has2	0.549942
MGI:109191	Hfe	1.23842	MGI:88316	Ccne1	0.555994
MGI:1920930	Zbtb8a	1.24103	MGI:5504037	Gm26922	0.56153
MGI:2685589	Parp4	1.24152	MGI:95276	Epha7	0.562055
MGI:96431	Cd79b	1.24202	MGI:1277171	Dcx	0.5704
MGI:2443963	Cadps2	1.24226	MGI:1919293	Sulf2	0.571575
MGI:1917278	Dopey2	1.24312	MGI:1933438	Slc16a3	0.572782
MGI:1918829	Tcta	1.2435	MGI:1929751	Asb4	0.572786
MGI:97595	Prkca	1.24384	MGI:1916969	Cad	0.5731
MGI:103257	Inpp5b	1.24505	MGI:2143322	AW551984	0.574468
MGI:99830	Cmpk2	1.24681	MGI:109598	Hsd3b6	0.575314
MGI:2663075	Adap2	1.24885	MGI:1890358	Igf2bp2	0.575663
MGI:1919212	Gatsl3	1.24893	MGI:96024	Hbb-bh1	0.579865
MGI:1289230	Pxk	1.25046	MGI:104589	Actg2	0.580343
MGI:1915025	Rtp4	1.25075	MGI:2444529	Dctd	0.586304
MGI:88139	Bcl2l1	1.25132	MGI:1916966	Trip13	0.587987
MGI:95893	H1f0	1.2519	MGI:1922566	Taf1d	0.58817
MGI:1858959	Elovl1	1.25193	MGI:1890396	Suv39h2	0.588969
MGI:1098243	Ifnar2	1.25201	MGI:1918195	Mmrn1	0.589338
MGI:2444831	C130074G19Rik	1.25277	MGI:5452232	Gm22455	0.589551
MGI:1914103	Pnpla2	1.25373	MGI:1861032	Raet1d	0.590091
MGI:105080	Tgoln1	1.25379	MGI:104979	Cnn1	0.590961
MGI:2442720	Tor4a	1.25411	MGI:1353651	Gnl3	0.591679
MGI:2386853	Rassf4	1.25414	MGI:108078	Sfrp2	0.594145
MGI:1859307	Unc93b1	1.25505	MGI:3645057	Rbm46	0.595632
MGI:2445087	Hid1	1.25513	MGI:102690	Srm	0.597039
MGI:97602	Prkcz	1.25552	MGI:101761	Hmga2	0.600334
MGI:1342287	Klf4	1.25593	MGI:96242	Hspd1	0.600977
MGI:108081	Sypl	1.25648	MGI:2652891	B4galnt4	0.602883
MGI:98961	Wnt7a	1.2566	MGI:88355	Cdh2	0.604321
MGI:1925558	Gpr108	1.25758	MGI:1890471	Pcbp4	0.607638
MGI:105085	Rbl2	1.25839	MGI:1338889	Uhrf1	0.60764
MGI:1352501	Bcar3	1.2588	MGI:2144566	Tsr1	0.608491
MGI:109528	Trpc1	1.25958	MGI:3031206	Olfr1372-ps1	0.609374
MGI:1329025	Edil3	1.25964	MGI:2138563	Sulf1	0.609554
MGI:1096381	Arntl	1.26208	MGI:5455413	Gm25636	0.609675
MGI:2137356	Trim16	1.26212	MGI:3651246	Gm12141	0.610618
MGI:1914762	Agpat2	1.26221	MGI:1917708	2610318N02Rik	0.611179
MGI:1927237	Cgn	1.26273	MGI:5454676	Gm24899	0.612204
MGI:102797	Acsl1	1.2628	MGI:3826572	Gm16302	0.612411
MGI:97600	Prkch	1.26302	MGI:1914338	Cand2	0.613351
MGI:97810	Ptprc	1.26343	MGI:1298205	Slc7a5	0.615317
MGI:107286	Man2b1	1.26373	MGI:105053	Hsph1	0.615722
MGI:1919139	Epn3	1.26399	MGI:96186	Hoxb5	0.615988
MGI:1921661	Ppapdc2	1.26438	MGI:2442524	Heatr1	0.616725
MGI:107164	Ppp3ca	1.26518	MGI:88314	Ccnd2	0.617339
MGI:88031	Anxa7	1.26718	MGI:106209	Hells	0.61785
MGI:2385897	Tmem184a	1.26798	MGI:5453285	Gm23508	0.618661
MGI:1346088	Cd52	1.26816	MGI:2135609	Lin7a	0.620088
MGI:103559	Sox18	1.2682	MGI:101914	Calb2	0.621393
MGI:2144765	Pld4	1.26917	MGI:98359	Sox11	0.621792
MGI:1346016	Arhgef28	1.26934	MGI:109166	Ncs1	0.623164
MGI:2384307	Rassf9	1.26943	MGI:1346322	Gpc6	0.623166
MGI:88557	Pcyt1a	1.26987	MGI:2661175	Cnksr2	0.627048
MGI:892877	Pld2	1.27236	MGI:3641891	Gm15470	0.628254
MGI:2385159	Ccm2l	1.27255	MGI:1860494	Ddx21	0.628764
MGI:1933117	Parp9	1.27363	MGI:2444826	Vash2	0.62924
MGI:2686925	Cyb561a3	1.27431	MGI:1917162	Nup43	0.634292
MGI:1924301	Os9	1.27506	MGI:1891916	Plag1	0.634335
MGI:95895	H2-Aa	1.27514	MGI:97402	Odc1	0.634478
MGI:2139014	Osbpl6	1.27528	MGI:1931148	Nme4	0.634621
MGI:98388	Sptbn1	1.27547	MGI:1914162	Bzw2	0.634713
MGI:1915021	Arpc5	1.27561	MGI:1355328	Nasp	0.634915
MGI:1915058	Tprgl	1.27587	MGI:2684864	Pfas	0.635181
MGI:1276523	Ncoa1	1.27601	MGI:1914226	2410002F23Rik	0.635511
MGI:2442894	Cobll1	1.27613	MGI:2137495	Myocd	0.635594
MGI:1919489	Parp14	1.27646	MGI:1095412	Unc5c	0.635704
MGI:1329042	Sgce	1.27662	MGI:1916604	Slc38a4	0.635758
MGI:2447532	Als2cl	1.27782	MGI:106181	Mybbp1a	0.636331
MGI:1915277	Tmem178	1.27814	MGI:2145099	Mis18bp1	0.637868
MGI:2444274	Ccdc108	1.27902	MGI:1315197	Hk2	0.63839
MGI:895149	Acadvl	1.27977	MGI:1196224	Cdk8	0.638477
MGI:1921615	Lonrf3	1.28025	MGI:3039376	Dnph1	0.639782
MGI:2147658	Afap1l2	1.28039	MGI:1349427	Exo1	0.639912
MGI:87989	Alas1	1.28068	MGI:88491	Crabp2	0.640462
MGI:106008	Anxa5	1.28108	MGI:1888908	Aldh18a1	0.640529
MGI:2385107	Rab7l1	1.28361	MGI:96949	Mdk	0.640853
MGI:1920249	Insig2	1.28417	MGI:3580254	Dgkk	0.641591
MGI:1354756	Crim1	1.28433	MGI:2684980	Mms22l	0.642133
MGI:2686976	Ifitm6	1.28453	MGI:95729	Gli3	0.642179
MGI:104803	Siae	1.28458	MGI:1935167	Hspe1-ps6	0.643154
MGI:98443	Surf1	1.28495	MGI:106040	Cyp51	0.643549
MGI:1336186	Agpat3	1.28508	MGI:96113	Hmgb1	0.644189
MGI:2387586	Tenc1	1.28536	MGI:97831	Ppa1	0.644954
MGI:2444110	Sgms1	1.28585	MGI:1919736	Rnf219	0.645285
MGI:1353623	Rnf19a	1.28723	MGI:96770	Lef1	0.645699
MGI:88449	Col15a1	1.28729	MGI:2685814	Hpse2	0.646478
MGI:109572	Tuft1	1.28744	MGI:1929881	Smoc2	0.647215
MGI:1917585	Reep6	1.28788	MGI:1859854	Rcor2	0.647243
MGI:95482	Fah	1.28813	MGI:1914203	Cdca7	0.647318
MGI:109383	Casp7	1.28824	MGI:5454232	Gm24455	0.647366
MGI:2140839	Lrrc8c	1.28848	MGI:1914384	Nop56	0.648684
MGI:109368	Gimap1	1.28942	MGI:5455134	Gm25357	0.649045
MGI:2385618	Mmrn2	1.28975	MGI:5454341	Gm24564	0.649139
MGI:2140321	Pafah2	1.2898	MGI:107891	Nop2	0.649446
MGI:2384853	Tapbpl	1.29023	MGI:2141989	Grwd1	0.649522
MGI:894695	Galnt3	1.29074	MGI:1919905	Snhg5	0.649582
MGI:1914097	Hint3	1.2908	MGI:1353460	Fkbp3	0.650601
MGI:2652845	Cdc42bpg	1.29098	MGI:2137302	B3gnt5	0.651046
MGI:1916120	Ak8	1.29136	MGI:2441808	Cdc14b	0.651612
MGI:107717	Myh9	1.2914	MGI:1926159	Mdn1	0.651669
MGI:103253	Cyb561	1.29195	MGI:1931838	Dbn1	0.652134
MGI:1349450	Vat1	1.29268	MGI:90675	Vars	0.652283
MGI:1915842	Syf2	1.29273	MGI:1914321	Rps6ka6	0.653497
MGI:97528	Pdgfb	1.29451	MGI:1860118	Sema3d	0.6539
MGI:1913760	Rnf181	1.29457	MGI:1913208	Carm1	0.654794
MGI:95665	Gba	1.29503	MGI:2155399	Polq	0.65529
MGI:108405	Apbb2	1.29515	MGI:2384863	Tbl3	0.656224
MGI:2151071	C1galt1	1.29518	MGI:2443731	Mat2a	0.656401
MGI:1926157	Atf6	1.29524	MGI:1350929	Asns	0.656485
MGI:2138391	Pid1	1.29581	MGI:97250	Myc	0.65668
MGI:1859310	Asah2	1.29608	MGI:1891740	Dact1	0.657693
MGI:1920551	Ttc29	1.29692	MGI:1100510	Bub1	0.658147
MGI:107567	Irgm1	1.29746	MGI:3037658	H2afy2	0.659106
MGI:1923765	Kdelc2	1.29748	MGI:1914544	Ikbkap	0.659182
MGI:98663	Tef	1.29773	MGI:5439880	DQ267102	0.65945
MGI:1344418	Cib1	1.29784	MGI:1890357	Igf2bp1	0.659906
MGI:1338859	P2rx4	1.29799	MGI:1916520	Gins1	0.659997
MGI:97751	Ppic	1.29806	MGI:2145219	Iars	0.660206
MGI:1913318	0610031J06Rik	1.29814	MGI:107914	Tia1	0.660401
MGI:107718	Dnah5	1.29824	MGI:1924093	Dtl	0.660738
MGI:1928765	Scube2	1.29826	MGI:1861727	Dkc1	0.661787
MGI:106321	Dock9	1.29861	MGI:1933331	Elovl4	0.66209
MGI:1277180	Ifi27	1.29969	MGI:1203524	Smarcc1	0.662261
MGI:3041242	Sema3g	1.29983	MGI:2652875	Wnk3	0.662305
MGI:1355313	C1ra	1.30107	MGI:5453416	Gm23639	0.663049
MGI:103224	Fdx1	1.30223	MGI:1298388	Umps	0.663203
MGI:1913509	Camk2n1	1.30235	MGI:109372	Cbx5	0.663387
MGI:98664	Tek	1.30239	MGI:97960	Rnps1	0.663546
MGI:1923784	Osbpl9	1.30322	MGI:3641675	Gm10115	0.663941
MGI:2388073	Camk1g	1.30432	MGI:1100874	Plagl1	0.664761
MGI:107744	Dnah6	1.30434	MGI:103198	Cdc25a	0.665673
MGI:2145021	Trib2	1.30534	MGI:1890359	Igf2bp3	0.667228
MGI:95523	Fgfr2	1.30573	MGI:2147003	Arhgap28	0.667585
MGI:103159	Cish	1.30596	MGI:1922088	Naa15	0.667775
MGI:87998	Alox12	1.30638	MGI:2442849	Pcdh11x	0.667924
MGI:2681008	Cers3	1.30653	MGI:1859631	Pdgfc	0.6685
MGI:108074	Sptlc2	1.30703	MGI:98737	Thbs1	0.668708
MGI:1916348	Tmem176b	1.30855	MGI:97357	Mycn	0.668829
MGI:2656973	Dtx3l	1.30875	MGI:5452348	Gm22571	0.66887
MGI:3643656	Gm6517	1.30906	MGI:108014	Polr1b	0.669849
MGI:1916119	Imp3	1.30908	MGI:104904	Tead2	0.670573
MGI:1891445	Peli2	1.31046	MGI:1918580	Rcbtb1	0.670684
MGI:107815	Pfkfb2	1.31073	MGI:3819545	Snord58b	0.670986
MGI:2139461	Tmem62	1.31134	MGI:1328362	Blm	0.67131
MGI:1929744	Cdc42ep2	1.31174	MGI:1919765	Wdr43	0.6717
MGI:102952	Dgka	1.31181	MGI:1330312	Magoh	0.672215
MGI:2676556	Akap13	1.31237	MGI:3819492	Snora20	0.673148
MGI:1913397	Necap2	1.31247	MGI:1196260	Hn1l	0.673252
MGI:1926031	Zc3hav1	1.31255	MGI:1919912	Dis3	0.673391
MGI:2384789	Tmem63a	1.31288	MGI:2155345	Col26a1	0.673623
MGI:2429944	Neurl3	1.313	MGI:1098233	Impact	0.673686
MGI:96590	Irf1	1.31342	MGI:103199	Mcm4	0.674755
MGI:2158925	Inpp4b	1.31357	MGI:108392	Slc20a1	0.674756
MGI:1913310	Cystm1	1.31366	MGI:1914199	Trim59	0.674917
MGI:893575	Plscr1	1.31447	MGI:1351352	Atic	0.674928
MGI:1928481	Lgals8	1.31514	MGI:1919918	Skida1	0.675058
MGI:1927225	Tbc1d8	1.31517	MGI:1923936	Clip3	0.67529
MGI:1196284	Tsc22d3	1.31542	MGI:104717	Meis1	0.67551
MGI:1914497	March2	1.31571	MGI:1920960	Tubb2b	0.675831
MGI:108046	Laptm5	1.31573	MGI:1355319	Exosc9	0.675979
MGI:1924270	Atl3	1.31579	MGI:97355	Nme1	0.675996
MGI:96624	Itpr3	1.31682	MGI:102889	Vcan	0.676166
MGI:1351469	Plekhb1	1.3176	MGI:1339986	Mettl1	0.676899
MGI:1916924	Mif4gd	1.31787	MGI:1096393	Snai2	0.677539
MGI:1095733	Pros1	1.31857	MGI:107690	Zfp462	0.677874
MGI:1919455	Eml2	1.31883	MGI:1298398	Mcm7	0.678121
MGI:96677	Kit	1.31981	MGI:1918019	Nolc1	0.678168
MGI:3039590	Tmtc1	1.31989	MGI:2443514	Wdhd1	0.678401
MGI:1860093	Stard10	1.32019	MGI:1194505	C1qbp	0.678691
MGI:1346318	Klf6	1.32106	MGI:1929091	Fam60a	0.679334
MGI:1095410	Tuba4a	1.32108	MGI:3819501	Snora33	0.679356
MGI:1195463	Mr1	1.32126	MGI:1913390	Ska2	0.6794
MGI:1918836	Ifih1	1.32137	MGI:1277103	Nudcd2	0.68024
MGI:1919671	Ttc30b	1.32201	MGI:3819511	Snora75	0.680421
MGI:97999	Ros1	1.32231	MGI:2444268	Fam169a	0.680609
MGI:2661187	Synm	1.32265	MGI:1913989	Rcc1	0.680903
MGI:1917088	Smim3	1.32414	MGI:1931071	Sec61a2	0.68124
MGI:2159336	Il17rc	1.32434	MGI:98002	Rpl12	0.681661
MGI:1891340	Lpin1	1.32474	MGI:5454189	Gm24412	0.682326
MGI:1922019	Pik3cb	1.32504	MGI:3665441	Tvp23a	0.682781
MGI:1278336	Cdkl5	1.32508	MGI:1922004	Dhcr24	0.682883
MGI:1859553	Lrrc6	1.32562	MGI:1926210	Cenpk	0.683462
MGI:107187	Bcl6	1.32592	MGI:2147437	Rrp12	0.683974
MGI:1926002	Csgalnact2	1.32596	MGI:1931051	Noc2l	0.684719
MGI:1924209	Chmp5	1.32603	MGI:87871	Acat2	0.684899
MGI:103123	Serpinb6a	1.32765	MGI:1860267	Set	0.684943
MGI:1914980	Gabarapl1	1.32829	MGI:1916867	Pitrm1	0.684956
MGI:109232	Npas2	1.32864	MGI:1194921	Ttk	0.685039
MGI:99554	Lgals3bp	1.32895	MGI:1345183	Tenm3	0.685535
MGI:1349396	Acot1	1.32968	MGI:1923382	Faxc	0.685566
MGI:1931295	Rab27b	1.33021	MGI:5477010	Gm26516	0.685672
MGI:105093	Cnn2	1.33044	MGI:3819538	Snord49a	0.685746
MGI:98927	Vcl	1.33049	MGI:1354946	Mapk6	0.686115
MGI:97794	Ptger2	1.33055	MGI:2384982	Cdca7l	0.686612
MGI:88047	Aplp2	1.33073	MGI:1920037	Ndc1	0.686642
MGI:1270840	Ehf	1.33077	MGI:5453124	Gm23347	0.686756
MGI:3045495	Tmem205	1.33101	MGI:1858304	Ctps	0.686924
MGI:104637	Tgfbr3	1.33127	MGI:3781931	Gm3756	0.687657
MGI:1915166	Ppap2b	1.33146	MGI:102551	Ccnf	0.688059
MGI:97583	Pik3r1	1.3324	MGI:1915436	4632427E13Rik	0.688107
MGI:2146607	Clic6	1.33264	MGI:99612	Epha3	0.688176
MGI:2447165	Cmtm6	1.33336	MGI:5452898	Gm23121	0.688396
MGI:1916937	Ypel5	1.3347	MGI:2387894	Snord87	0.688607
MGI:99603	Smarca2	1.33479	MGI:108025	Prkar2a	0.688762
MGI:2384986	Rnf144b	1.3348	MGI:3819512	Snora7a	0.688808
MGI:1309992	Cbr3	1.33532	MGI:1918252	Mex3b	0.68901
MGI:95715	Gja4	1.33532	MGI:1917274	Mcm10	0.689085
MGI:2442082	Tmem30b	1.33538	MGI:1914735	Pwp1	0.689352
MGI:1929618	Stard3	1.33561	MGI:96982	Mif	0.689448
MGI:2385001	Fermt2	1.33571	MGI:5456234	Gm26457	0.689495
MGI:99532	Mef2a	1.33589	MGI:1096340	E2f3	0.689607
MGI:1933966	Mcam	1.33598	MGI:1933947	Rtn1	0.690053
MGI:96659	Kcna2	1.33613	MGI:1352474	Tnfrsf19	0.690186
MGI:894659	Hbp1	1.33696	MGI:1100863	Kpna3	0.690379
MGI:2444661	4933426M11Rik	1.33699	MGI:95393	Eno1	0.690721
MGI:109321	Lama4	1.33701	MGI:1314881	Chaf1b	0.690981
MGI:1919618	2310045N01Rik	1.33726	MGI:5453121	Gm23344	0.691109
MGI:1277961	Plec	1.33965	MGI:97857	Rarb	0.691151
MGI:109595	Ccndbp1	1.33978	MGI:1860487	Pcdh7	0.691265
MGI:104565	Cdkn1b	1.34044	MGI:98962	Wnt7b	0.691547
MGI:2384718	Cdc42ep3	1.34051	MGI:1917933	Utp20	0.691738
MGI:96396	Id1	1.34063	MGI:108048	Smyd5	0.69179
MGI:101802	F2r	1.34101	MGI:2449311	Gemin5	0.691978
MGI:106185	Ccr2	1.34128	MGI:1196391	Pole	0.692294
MGI:1917676	Tekt5	1.3414	MGI:1914988	Ppid	0.692427
MGI:1201692	Rabac1	1.34194	MGI:1914784	Ttll4	0.692441
MGI:1928375	Arpc3	1.34197	MGI:1924836	Mthfd1l	0.69252
MGI:1346049	Hs2st1	1.34222	MGI:894697	Rad54l	0.692591
MGI:1916905	Cd164l2	1.34235	MGI:1340806	Parp1	0.692622
MGI:1916784	Avpi1	1.34254	MGI:95727	Gli1	0.692817
MGI:2146198	Ttc38	1.34299	MGI:2443149	Gen1	0.692819
MGI:2147039	Stap2	1.3434	MGI:2448436	Hist1h4j	0.692824
MGI:1344332	Wif1	1.34375	MGI:109274	Trim28	0.692891
MGI:2140300	AI464131	1.34377	MGI:1355274	Uchl3	0.692918
MGI:103040	Rsu1	1.34384	MGI:1343489	Mpdz	0.693793
MGI:96534	Cd74	1.3443	MGI:1919650	Pinx1	0.694301
MGI:1914107	Plbd1	1.34431	MGI:1914311	Dzip1	0.694415
MGI:2157091	Ttyh2	1.34489	MGI:109296	Sqle	0.694428
MGI:1914172	Rras2	1.34495	MGI:2138939	Nat10	0.694598
MGI:1860835	Ak3	1.34597	MGI:1196294	Fubp1	0.694828
MGI:1099464	Ssr4	1.34608	MGI:5454393	Gm24616	0.695115
MGI:1889371	Il17re	1.34641	MGI:1915276	2810417H13Rik	0.695166
MGI:96617	Cd47	1.34649	MGI:1914152	Mtap	0.695166
MGI:103070	H2-Ab1	1.34656	MGI:1926421	Tcerg1	0.695881
MGI:1201785	Fxyd5	1.34708	MGI:1338802	Shcbp1	0.696022
MGI:1914164	Vps28	1.34801	MGI:1860374	Mad2l1	0.696079
MGI:2159614	Mia2	1.34816	MGI:104680	Hspe1	0.696313
MGI:2442252	Lrp4	1.3483	MGI:1914934	Luc7l3	0.696486
MGI:1916193	Pink1	1.34938	MGI:1924261	Ticrr	0.696493
MGI:1341859	Gstz1	1.34957	MGI:1915223	Mphosph10	0.69676
MGI:1306826	Sema7a	1.35033	MGI:1924265	Mpped2	0.696803
MGI:1917760	Rnf167	1.35049	MGI:2444576	Kif20b	0.697461
MGI:1917777	Stambp	1.35057	MGI:1930197	Ncapg	0.697553
MGI:1350933	Bcap31	1.3507	MGI:1933184	Nop58	0.697598
MGI:1098615	Kank3	1.35096	MGI:1914617	Paxbp1	0.697998
MGI:107474	Cd38	1.35099	MGI:1890948	Supt16	0.69825
MGI:1277124	Asah1	1.35113	MGI:3645261	Gm7278	0.698613
MGI:1916774	Esam	1.35152	MGI:1916487	Gtpbp4	0.699289
MGI:96394	Icam2	1.35201	MGI:3833934	Gm16314	0.699392
MGI:102755	Zbtb7b	1.35309	MGI:1344424	Osr1	0.699497
MGI:90168	Dcaf11	1.3532	MGI:1929092	Rbm14	0.6996
MGI:2140279	Tdrd7	1.35327	MGI:3629899	Mir679	0.699748
MGI:1919051	Plekhf2	1.35381	MGI:3041235	Ska3	0.700021
MGI:1922394	Pdzd2	1.35395	MGI:97621	Plk1	0.700236
MGI:1918006	Dock4	1.3541	MGI:1096573	Cirh1a	0.700377
MGI:1338011	Auh	1.35421	MGI:1920423	Pcdh18	0.701667
MGI:96611	Itgb2	1.35421	MGI:894684	Pa2g4	0.702139
MGI:1915932	Slc44a2	1.35465	MGI:103029	Mdk-ps1	0.702198
MGI:106183	Ocln	1.35509	MGI:2139806	Spg20	0.702646
MGI:108466	Ralbp1	1.35554	MGI:1923389	Haus6	0.703037
MGI:99946	Creb3	1.35568	MGI:108070	Zik1	0.703072
MGI:106387	D10Bwg1379e	1.35583	MGI:107682	Ppp1r14b	0.703365
MGI:1916051	Elovl5	1.35585	MGI:1098258	Kif15	0.703564
MGI:96398	Id3	1.35599	MGI:2146571	Rfc4	0.704167
MGI:95832	Grn	1.35635	MGI:99454	Irs1	0.704187
MGI:2387599	Prr15l	1.35656	MGI:98344	Snrpd1	0.704453
MGI:106096	Loxl1	1.35678	MGI:1930842	Ankrd49	0.704523
MGI:107949	Rhob	1.35774	MGI:1918001	6330403K07Rik	0.704546
MGI:1346335	Tekt2	1.35821	MGI:105380	Mcm2	0.704836
MGI:109613	Matn2	1.35866	MGI:2140726	Guf1	0.704862
MGI:106664	Cd93	1.35889	MGI:2443901	6720489N17Rik	0.704882
MGI:1928939	Acot9	1.35902	MGI:2384791	Slc26a7	0.704886
MGI:1929897	Clstn2	1.35926	MGI:1351663	Skp2	0.704911
MGI:107655	Ifngr1	1.35937	MGI:88302	Ccnb1	0.705522
MGI:1921436	Ccdc3	1.35945	MGI:3648844	Gm5937	0.705771
MGI:894670	Ldb2	1.36055	MGI:96269	Ranbp1	0.705835
MGI:87920	Plin2	1.36141	MGI:1339951	Cse1l	0.706054
MGI:1346341	Rnf13	1.36168	MGI:1918291	Pcgf6	0.706165
MGI:96683	Kdr	1.36219	MGI:105976	Myo5a	0.706455
MGI:1915971	1110032A03Rik	1.36282	MGI:1100850	Capn6	0.706498
MGI:1351641	Naglu	1.36289	MGI:1915167	Zcchc3	0.706545
MGI:1314884	Tnfrsf1a	1.3629	MGI:1917715	Wdr77	0.70685
MGI:1925752	Tmem159	1.36304	MGI:104793	Runx1t1	0.707074
MGI:1913359	Tspan13	1.36368	MGI:2145443	Utp15	0.708119
MGI:109235	Itpkb	1.3638	MGI:1919096	Syce2	0.708202
MGI:96789	Lipa	1.36436	MGI:3525201	Mdc1	0.708392
MGI:1306797	Aoc3	1.36472	MGI:2385096	Pprc1	0.708511
MGI:1330819	Osmr	1.36513	MGI:1917206	Ptcd3	0.708574
MGI:1859665	Atp8b1	1.36526	MGI:2686040	Mtx3	0.708711
MGI:1328318	Atp6v0e	1.36552	MGI:1922392	4930529C04Rik	0.708725
MGI:96794	Lmna	1.36621	MGI:1352745	Fscn1	0.708917
MGI:88263	Capn1	1.36807	MGI:1919666	Lrpprc	0.709849
MGI:96591	Irf2	1.36828	MGI:1351320	Trp53bp1	0.710452
MGI:1924840	Chst15	1.36929	MGI:102810	Lmo3	0.710643
MGI:99906	Tie1	1.37039	MGI:2137677	Sfxn1	0.710773
MGI:2183535	Cytip	1.37112	MGI:96184	Hoxb3	0.710867
MGI:2443248	Exph5	1.37116	MGI:106067	Smc2	0.711506
MGI:2447362	Slc24a4	1.37122	MGI:1261834	Wnt2b	0.711525
MGI:98325	Smpd1	1.37135	MGI:101845	Mcm3	0.711606
MGI:1921160	Arhgap18	1.37169	MGI:2443387	Zc3hav1l	0.711702
MGI:2147914	Nxt2	1.37171	MGI:2145274	BC016423	0.711784
MGI:103225	Cyp4b1	1.37186	MGI:2142598	Slc7a6	0.712032
MGI:2679007	Elmo3	1.37235	MGI:97591	Pkm	0.712275
MGI:1921280	Rin2	1.37238	MGI:2443607	Rpp38	0.712348
MGI:107704	Abcg1	1.37238	MGI:1920018	Topbp1	0.712353
MGI:2385155	Btbd3	1.37285	MGI:5452661	Gm22884	0.712495
MGI:1914148	Baiap2l1	1.37326	MGI:1919890	Mex3a	0.71264
MGI:2443388	Kdm7a	1.37333	MGI:2140270	AI427809	0.712694
MGI:1916372	Ptgr2	1.37367	MGI:1270839	Cacybp	0.712706
MGI:2443264	9330182L06Rik	1.37369	MGI:1916996	Znhit6	0.712711
MGI:1349721	Tob1	1.37421	MGI:1261827	Dnmt3a	0.713271
MGI:1276109	Cldn1	1.37459	MGI:1195458	Abce1	0.71328
MGI:95455	Ets1	1.37475	MGI:1919787	Cdca2	0.71363
MGI:2151075	Tnfrsf21	1.37528	MGI:1926232	Srsf7	0.713899
MGI:1922722	1700009P17Rik	1.37568	MGI:96437	Igfbp2	0.714062
MGI:107720	Dnah12	1.37619	MGI:1099436	Rad51b	0.714362
MGI:1889205	Cpq	1.37642	MGI:3038613	Rragb	0.714587
MGI:1915938	Abhd4	1.37645	MGI:2135283	Igsf9	0.714623
MGI:1925915	Marc2	1.37683	MGI:1914736	Polr3g	0.714826
MGI:95593	Fuca1	1.37763	MGI:96013	Hat1	0.714856
MGI:2147716	Slc16a12	1.37798	MGI:1920924	Wdr75	0.714888
MGI:1330838	Lgmn	1.37818	MGI:1917195	Fndc4	0.715103
MGI:104767	Gpx4	1.37858	MGI:3647766	Gm6478	0.715842
MGI:96748	Lamp2	1.37969	MGI:98181	Rrm2	0.716055
MGI:1313258	Slfn2	1.37971	MGI:1915743	Ndufaf4	0.71608
MGI:108412	Ppap2a	1.37972	MGI:2442925	Atad5	0.71617
MGI:1859353	Mkrn1	1.37993	MGI:2140750	Zfp518b	0.716172
MGI:96599	Itga1	1.37995	MGI:1351328	Dbf4	0.716325
MGI:105388	Cdkn2c	1.37995	MGI:98423	Ssb	0.716451
MGI:1929480	Lrp10	1.38026	MGI:2442342	Uspl1	0.716712
MGI:1914877	Olfml3	1.38032	MGI:3051647	Pappa2	0.717132
MGI:98759	Tjp1	1.3806	MGI:2443767	Aaas	0.717679
MGI:88208	Bsg	1.38075	MGI:1913773	2810004N23Rik	0.717764
MGI:1918918	Atraid	1.38154	MGI:5433980	Gm21816	0.717823
MGI:1929501	Arl6ip5	1.38167	MGI:1918248	Phf6	0.717885
MGI:1916320	Adamts9	1.38205	MGI:1917689	Taf15	0.717937
MGI:2429498	Gprc6a	1.38215	MGI:1347520	Ror1	0.717941
MGI:87963	Agt	1.38292	MGI:1919668	Thoc1	0.717996
MGI:104540	Clec3b	1.38323	MGI:3851608	Snord14a	0.718127
MGI:2144423	Arhgap44	1.38446	MGI:107532	Kpnb1	0.718268
MGI:1328324	Syngr2	1.38458	MGI:1914454	Eif2s2	0.718344
MGI:97631	Pmp22	1.38466	MGI:2146156	Espl1	0.718502
MGI:1890497	Plvap	1.38624	MGI:1928380	B4galt6	0.718543
MGI:107931	Sqstm1	1.38657	MGI:109634	Terf1	0.718575
MGI:1922725	Oplah	1.38699	MGI:103008	Epb4.1l3	0.718599
MGI:1924661	Esrp2	1.38767	MGI:1891840	Ncbp1	0.71866
MGI:2145597	Mbnl2	1.3891	MGI:1917822	Ipo5	0.718792
MGI:1920819	Vgll3	1.39005	MGI:2140779	Sdad1	0.71962
MGI:1916145	Rasl11a	1.39101	MGI:97550	Pfn2	0.719667
MGI:1859650	Ramp2	1.39223	MGI:1913484	Sc4mol	0.719832
MGI:95745	Hagh	1.39272	MGI:1913606	Knop1	0.719846
MGI:107362	Stxbp3a	1.39281	MGI:1915337	Dcakd	0.719982
MGI:2138828	Eps8l2	1.39313	MGI:3649675	Gm12571	0.719997
MGI:1891190	Ctsz	1.39316	MGI:1345277	Ddr2	0.720005
MGI:98926	Vcam1	1.39336	MGI:1918115	Lnp	0.720126
MGI:96545	Il1r1	1.39426	MGI:2442377	Ipo11	0.720128
MGI:106510	Lurap1l	1.39431	MGI:104602	Prpf39	0.720143
MGI:1277238	Wdr52	1.3961	MGI:1913864	Gpatch4	0.7208
MGI:1917816	Abhd17b	1.39682	MGI:2685175	Asxl3	0.720861
MGI:108474	Fzd6	1.39685	MGI:107252	Nsun2	0.720936
MGI:1349457	Serinc3	1.39696	MGI:2445092	Utp14b	0.721116
MGI:1261422	Naga	1.39718	MGI:1926810	Tmeff1	0.721293
MGI:102793	Fstl1	1.39773	MGI:1353621	Zfp354c	0.721376
MGI:1347356	Adamts2	1.39863	MGI:1355299	Hnrnpdl	0.721501
MGI:1923927	Pcmtd2	1.39915	MGI:97286	Ncl	0.721616
MGI:1891430	Slc36a2	1.39939	MGI:1888939	Sept6	0.721676
MGI:109185	Nov	1.39944	MGI:2140103	Nmd3	0.722039
MGI:1195456	Rnh1	1.39953	MGI:1915031	Ilf2	0.722124
MGI:95705	B4galt1	1.39967	MGI:1328306	Orc2	0.722152
MGI:98179	Rras	1.39985	MGI:1930079	Fads2	0.722263
MGI:96055	Ptpn6	1.40013	MGI:1917302	Prpf4	0.722397
MGI:1917360	Ifi35	1.40016	MGI:96159	Hmgcr	0.72249
MGI:1201780	Atp6v1a	1.40041	MGI:2181182	Nup155	0.722678
MGI:107543	Sox17	1.40076	MGI:3708786	Gm10358	0.722805
MGI:1890602	Gabarapl2	1.40096	MGI:1344413	Tex10	0.722985
MGI:1919067	Tmem50a	1.40127	MGI:1889278	Pdss1	0.723246
MGI:2388271	Mylip	1.40164	MGI:1918180	Nol8	0.723599
MGI:2442111	Ppm1k	1.40179	MGI:104685	Twist2	0.723619
MGI:109492	Oaz2	1.40179	MGI:1321387	Rnu73b	0.723942
MGI:103573	Cebpd	1.40226	MGI:3646681	Gm9027	0.724512
MGI:1922814	Rsph9	1.40259	MGI:1914473	Rrp15	0.724644
MGI:1341272	Col14a1	1.40262	MGI:894652	Usp10	0.724659
MGI:2444223	Serinc5	1.40411	MGI:1922873	Tex30	0.724734
MGI:88381	F3	1.40458	MGI:1922666	Nop14	0.724943
MGI:3026924	Fam84b	1.40512	MGI:2147897	Cenpi	0.725186
MGI:3026880	Fam124b	1.40577	MGI:892003	Tcof1	0.725339
MGI:1915115	Rgs10	1.40604	MGI:109596	Kifc1	0.725507
MGI:2677454	Cetn4	1.40642	MGI:1917433	Dzip3	0.725519
MGI:97855	Rap2a	1.40656	MGI:1099440	Suv39h1	0.725729
MGI:2685335	Mctp2	1.40894	MGI:1914705	Klhl13	0.725944
MGI:1928144	Plekha2	1.40952	MGI:5454188	Gm24411	0.72595
MGI:109603	Cmklr1	1.4105	MGI:2442599	Simc1	0.726141
MGI:2654575	Cybrd1	1.41098	MGI:2387107	Dusp9	0.726151
MGI:109585	Pld1	1.41117	MGI:1890476	Rad18	0.726194
MGI:1923811	Snx7	1.41121	MGI:1923207	Mir17hg	0.726211
MGI:104991	Mxd4	1.41175	MGI:1914621	Gtf3c6	0.726428
MGI:1891701	Pxmp4	1.41183	MGI:1914192	Ddx18	0.726445
MGI:1921761	Lrrc17	1.412	MGI:1347487	Foxm1	0.726797
MGI:2148924	Clic1	1.41229	MGI:2385292	Tnrc6a	0.726988
MGI:3650036	Gm13244	1.41316	MGI:1098622	Rif1	0.727012
MGI:2142610	Snx25	1.41417	MGI:1096397	Polr1a	0.727038
MGI:1306799	D17H6S56E-5	1.41436	MGI:1923469	Arxes1	0.72723
MGI:94873	Pcbd1	1.41451	MGI:2389142	Emilin3	0.727331
MGI:1298382	Plp2	1.41531	MGI:1919847	Auts2	0.727393
MGI:1196458	Scarb2	1.41575	MGI:1915264	Zwilch	0.727413
MGI:1100508	Kcnj8	1.41575	MGI:99660	Pola1	0.727601
MGI:1918843	Llgl2	1.41679	MGI:1913898	Tpgs2	0.727694
MGI:98958	Wnt5a	1.41694	MGI:103197	Mcm5	0.727955
MGI:1925179	Yipf6	1.41913	MGI:1890648	Fignl1	0.728068
MGI:1919308	Igsf5	1.4197	MGI:1860295	Ftsj3	0.728332
MGI:107180	Elf1	1.41975	MGI:1917890	Dcp2	0.728583
MGI:2442259	Gsap	1.42019	MGI:1918893	4930422G04Rik	0.72921
MGI:1915882	Myct1	1.42019	MGI:1921763	Neto2	0.729333
MGI:1915703	Gpihbp1	1.42043	MGI:1345148	Sept3	0.729615
MGI:1196616	Rbpjl	1.4208	MGI:109337	Brca2	0.729656
MGI:1100819	Aff1	1.42107	MGI:5452913	Gm23136	0.729971
MGI:1922647	Arhgap24	1.42216	MGI:95654	Gart	0.73064
MGI:2385331	Stard13	1.42223	MGI:1343101	Kat2a	0.73067
MGI:1920974	Mcee	1.42228	MGI:1914255	Polr3k	0.731234
MGI:1921396	Dock8	1.42412	MGI:2138133	Lrrc59	0.73131
MGI:1921405	Errfi1	1.42468	MGI:1913884	Mcm8	0.731409
MGI:108520	Fzd4	1.42598	MGI:1888526	Xpo4	0.73143
MGI:95904	H2-K1	1.42623	MGI:1917135	Aunip	0.731554
MGI:2446854	Gpr64	1.42763	MGI:1915217	Pold3	0.731726
MGI:3528937	Gramd2	1.42769	MGI:1913948	Cpsf6	0.731829
MGI:95762	Gm2a	1.42774	MGI:98284	Srsf2	0.732182
MGI:2135756	Hspb8	1.42778	MGI:2387585	Zfp280c	0.732185
MGI:2385825	Plekhb2	1.42838	MGI:2685054	Gpr161	0.732405
MGI:1915274	Hist1h2bc	1.42956	MGI:2443061	Tmem132c	0.732415
MGI:88549	Csrp1	1.42961	MGI:1924854	Rbm12b2	0.732463
MGI:1336194	Tpp1	1.43044	MGI:1923001	Ipo4	0.732469
MGI:1343142	Arpc1b	1.43056	MGI:1921291	4632434I11Rik	0.732486
MGI:2442473	Rhbdf2	1.43093	MGI:1098592	Alg3	0.732511
MGI:1915254	Tmem9b	1.43131	MGI:105050	Mtf2	0.732558
MGI:98373	Sparc	1.43146	MGI:1346870	Map2k6	0.732785
MGI:5477071	Gm26577	1.43194	MGI:1351465	G3bp1	0.732843
MGI:2446136	Arrdc1	1.43252	MGI:1914492	Gemin6	0.732942
MGI:1919129	Acsl5	1.43447	MGI:2444815	Samd5	0.733187
MGI:1920904	Ccrl2	1.43653	MGI:96185	Hoxb4	0.733206
MGI:3027894	Rsph4a	1.43654	MGI:101784	Nes	0.733548
MGI:2388479	Ppp2r5a	1.43705	MGI:1098547	Nhp2	0.733699
MGI:2137648	Ifi30	1.43814	MGI:2152414	Ipo7	0.733706
MGI:1345139	Spry1	1.4385	MGI:106908	Srpk1	0.734289
MGI:2149821	Hsd17b11	1.43908	MGI:1919201	Gpc2	0.7344
MGI:1915291	Mid1ip1	1.43992	MGI:95305	Eif4e	0.73449
MGI:1321404	Ly86	1.44023	MGI:1914391	Fbxo5	0.734752
MGI:107497	Fxyd3	1.44086	MGI:1924828	Bcl9	0.734842
MGI:1858210	Stx7	1.44173	MGI:109497	Gata5	0.735937
MGI:2135755	Cox4i2	1.4418	MGI:95757	Slc2a3	0.736333
MGI:98266	Sord	1.44192	MGI:2446259	Ntm	0.736433
MGI:1915271	Bphl	1.44222	MGI:98510	Tcf3	0.736549
MGI:1289192	Fbxo36	1.44373	MGI:1924994	Bora	0.736682
MGI:1914829	Cpeb4	1.44433	MGI:1917600	Basp1	0.736713
MGI:1312985	Tagln2	1.44511	MGI:88250	Cald1	0.736956
MGI:99676	Adcy2	1.44527	MGI:1918764	Sfpq	0.737054
MGI:105382	Lama5	1.4454	MGI:108476	Fzd3	0.737055
MGI:2652132	Pttg1ip	1.44588	MGI:1920040	Ssbp1	0.737229
MGI:1330826	Atp9a	1.44636	MGI:1923517	Fads1	0.737418
MGI:1915909	Fam198b	1.4465	MGI:2445153	Clspn	0.737524
MGI:2444667	Kctd12b	1.44689	MGI:109331	Nxn	0.73764
MGI:1919683	Rab38	1.4471	MGI:1919367	Naa50	0.73769
MGI:95524	Fgfr3	1.44718	MGI:99470	Dnajc2	0.737731
MGI:3643568	Gm6762	1.44804	MGI:1926139	Wsb1	0.73781
MGI:1927168	Dusp14	1.44897	MGI:3590554	BC055324	0.737829
MGI:2135605	Pard6b	1.44921	MGI:107202	Atm	0.737924
MGI:2385244	Tmem150a	1.4495	MGI:1915349	Fam92a	0.738059
MGI:1338031	Spint2	1.44963	MGI:1924470	Tmem200a	0.738177
MGI:2442366	Peak1	1.44978	MGI:98299	Shmt1	0.738569
MGI:1914270	Tmem88	1.44983	MGI:107547	Zfp101	0.738603
MGI:1918954	Arhgef3	1.45002	MGI:101789	Lig1	0.738623
MGI:1321395	Ltbp4	1.45063	MGI:1346031	Tshz1	0.73864
MGI:1100881	Prss12	1.45066	MGI:94912	Dnmt1	0.738665
MGI:104556	Cdkn1a	1.45075	MGI:1334460	Bop1	0.738733
MGI:2447167	Cmtm8	1.45201	MGI:2139369	Rtel1	0.73892
MGI:1277980	Fgf18	1.45232	MGI:2135937	Sbk1	0.739204
MGI:95861	Gstm2	1.45272	MGI:1913789	Xpo5	0.739235
MGI:2152187	Cyyr1	1.45407	MGI:106295	Tomm70a	0.739261
MGI:2388637	Wwc1	1.45536	MGI:1918816	Clmp	0.73927
MGI:2684924	Pcdh17	1.45599	MGI:103071	Rangap1	0.739377
MGI:2684416	Arap2	1.45653	MGI:2685011	Dchs1	0.739584
MGI:1925638	Mvp	1.45705	MGI:3039600	Fbxl19	0.739747
MGI:1101355	Ltbp3	1.45723	MGI:2444029	Ankrd52	0.740272
MGI:96551	Il2rg	1.45846	MGI:1922960	Rbm12	0.74071
MGI:1354713	Acsl4	1.45904	MGI:1354959	Hs6st2	0.740819
MGI:97844	Rab3d	1.45973	MGI:1925901	Lsm6	0.741817
MGI:1914367	Dynlt3	1.46001	MGI:1298378	Dhcr7	0.741838
MGI:106015	Cox7a2l	1.4608	MGI:1921772	Morc2a	0.741959
MGI:2443510	Tacc1	1.46182	MGI:2388656	Zfp334	0.741987
MGI:95660	Gas6	1.46186	MGI:5453821	Gm24044	0.742051
MGI:1921435	Gbe1	1.46229	MGI:1915889	Smyd2	0.742252
MGI:1924378	Crebrf	1.46264	MGI:2177178	Dicer1	0.742276
MGI:1338015	Sort1	1.46272	MGI:1921285	Nol9	0.742786
MGI:1333849	Rasgrp2	1.46357	MGI:2443205	Rbm15	0.742913
MGI:1917649	Wwtr1	1.46372	MGI:97610	Plat	0.742919
MGI:1923741	Abhd14b	1.46571	MGI:106184	Npm1	0.743015
MGI:1918483	Enkur	1.46825	MGI:1917672	Ints2	0.743048
MGI:1354735	Atp11a	1.46847	MGI:1858211	Zranb2	0.743129
MGI:3028579	Rasgrp3	1.46951	MGI:1924872	Apex2	0.743214
MGI:97565	Pgm2	1.47015	MGI:1913869	Atat1	0.743982
MGI:2444633	Vstm4	1.47075	MGI:1917370	Yars2	0.744002
MGI:1352462	Nr1h3	1.47094	MGI:1914297	Rars	0.744192
MGI:96605	Itga6	1.47113	MGI:1338850	Mthfd2	0.744418
MGI:88336	Cd40	1.47265	MGI:1338042	Pcdh10	0.744474
MGI:105120	Dusp1	1.47297	MGI:107376	Msi1	0.744695
MGI:108384	Btg2	1.47357	MGI:1351331	Chaf1a	0.745056
MGI:1913425	Mustn1	1.47387	MGI:1339973	Ilf3	0.745066
MGI:1916189	Rasl11b	1.47581	MGI:2448558	Fancb	0.745134
MGI:95824	Nr3c1	1.47607	MGI:2151114	Dgcr8	0.745271
MGI:1922818	Capsl	1.47661	MGI:96239	Hsf2	0.745272
MGI:1306784	Cited2	1.47687	MGI:1914228	Luc7l	0.745428
MGI:106603	Serpinb9	1.47739	MGI:2145895	Slc38a1	0.745507
MGI:2181193	Dennd2d	1.4774	MGI:3045342	Zfp711	0.745658
MGI:1916377	Ociad2	1.47839	MGI:2449568	Morn4	0.74568
MGI:1337120	Slc7a7	1.47842	MGI:1276107	Mmp16	0.745682
MGI:107494	Myl12b	1.47898	MGI:5454965	Gm25188	0.745689
MGI:2446181	Slc37a1	1.47916	MGI:3704127	Zfp808	0.745698
MGI:88059	App	1.47917	MGI:1343045	Rbmxl1	0.74606
MGI:1913316	Gng11	1.47974	MGI:1922038	E2f8	0.746123
MGI:96892	Lyn	1.48165	MGI:1918944	Ipo9	0.746341
MGI:1929988	Klf15	1.48228	MGI:1920949	Ppp2r1b	0.74688
MGI:1096355	S1pr1	1.48245	MGI:1927340	Mpp6	0.747007
MGI:2139667	Dpyd	1.48249	MGI:1277962	Hus1	0.747448
MGI:2655562	Eltd1	1.48274	MGI:1098230	Cenpe	0.748045
MGI:108481	Anxa11	1.4834	MGI:1329037	Strap	0.748258
MGI:2143163	Mapkapk3	1.48362	MGI:1351645	Prmt5	0.748283
MGI:104750	Nrcam	1.4837	MGI:2443483	Pdzd4	0.748596
MGI:2443049	D230025D16Rik	1.48483	MGI:108069	Ccna2	0.748743
MGI:1096350	Fgfbp1	1.48549	MGI:102726	Dck	0.748803
MGI:106206	Nrp1	1.48554	MGI:3781485	Gm3307	0.748845
MGI:2137698	Ugt1a6a	1.48583	MGI:1343961	Msh6	0.748904
MGI:88455	Col4a2	1.48629	MGI:1316728	Gspt1	0.748998
MGI:1101781	Elf3	1.48712	MGI:103239	Tfap4	0.749003
MGI:2443220	Slc4a5	1.48842	MGI:1919224	Prmt3	0.749003
MGI:1933155	Arl4d	1.48959	MGI:1341163	Tacc3	0.749175
MGI:2687281	Fam105a	1.48981	MGI:1919712	Rrp1b	0.749518
MGI:97371	Npr1	1.49008	MGI:2677849	Ccbl2	0.749751
MGI:98729	Tgfbr2	1.49072	MGI:1916749	Tsr2	0.749768
MGI:1919090	Tekt4	1.4909	MGI:1338035	Itgb8	0.750256
MGI:1351867	Slco3a1	1.49173	MGI:104810	Plaa	0.750748
MGI:102896	Sult1a1	1.49206	MGI:108075	Smo	0.75079
MGI:1924375	Il33	1.49225	MGI:1932610	Noc3l	0.750802
MGI:104783	Atxn1	1.49246	MGI:1923294	Ncapg2	0.751015
MGI:1929899	Sqrdl	1.49325	MGI:1919055	Nup93	0.751019
MGI:108005	Myd88	1.49431	MGI:2443590	Ddx11	0.751091
MGI:3588195	Adamts17	1.49438	MGI:2446190	Nup188	0.751554
MGI:88158	Bgn	1.49456	MGI:103075	Wee1	0.751621
MGI:1929938	Perp	1.4949	MGI:1342292	Hspa4	0.751745
MGI:2388029	Liph	1.49502	MGI:1920026	Sass6	0.751769
MGI:1338033	Spint1	1.49511	MGI:1924050	Usp42	0.751901
MGI:1926051	Ak7	1.49518	MGI:105373	Ptch1	0.752054
MGI:98730	Tgm1	1.49563	MGI:1095403	Sf1	0.752239
MGI:96965	Mertk	1.49583	MGI:2652872	Nynrin	0.752405
MGI:2442858	Ddx58	1.49586	MGI:88313	Ccnd1	0.752476
MGI:101864	Dag1	1.49625	MGI:104537	Brca1	0.752492
MGI:1923484	Magi3	1.49683	MGI:1345633	Mars	0.752518
MGI:105057	Cdh5	1.49764	MGI:2442071	Gprasp2	0.752567
MGI:97283	Ncf1	1.49834	MGI:1913833	Exosc1	0.752691
MGI:1920537	1700040L02Rik	1.49857	MGI:1924933	Ehmt1	0.752808
MGI:1917786	Qpct	1.49905	MGI:3647324	Gm5809	0.752907
MGI:88454	Col4a1	1.4996	MGI:88566	Ctxn1	0.753139
MGI:1920932	Acer2	1.49968	MGI:1097163	Pold2	0.753207
MGI:1923930	5330417C22Rik	1.50045	MGI:88452	Col2a1	0.753619
MGI:2443999	Pde8b	1.50046	MGI:1914974	Pop1	0.753623
MGI:88329	Cd34	1.50115	MGI:2679257	Zfp760	0.754
MGI:1918882	Scn3b	1.50153	MGI:1922523	Pelp1	0.754055
MGI:109545	Gpr182	1.50306	MGI:2442620	Nup133	0.754146
MGI:88017	Mat1a	1.50308	MGI:1289227	Zwint	0.754272
MGI:1098718	Tmem38b	1.5038	MGI:1313302	Cenpf	0.754296
MGI:1194898	Ppl	1.5039	MGI:2141625	Nup205	0.754447
MGI:1344333	Mid2	1.50466	MGI:1919784	Rcc2	0.754506
MGI:1309515	Gsta4	1.50512	MGI:2145245	Srek1	0.754662
MGI:1922806	1700026D08Rik	1.50534	MGI:1858419	Bysl	0.754752
MGI:1922989	Mpp7	1.50587	MGI:2384034	Alkbh1	0.754793
MGI:97830	Pygm	1.50657	MGI:1924968	Fam178a	0.754801
MGI:1922679	Fam183b	1.50659	MGI:1921134	Zdbf2	0.754867
MGI:107422	Hspa4l	1.5071	MGI:1921463	Rbm26	0.75516
MGI:1914797	Slc39a8	1.50719	MGI:1920231	Prkrir	0.755176
MGI:99682	Tmbim6	1.50768	MGI:894835	Rbbp6	0.755258
MGI:2444594	Slc26a9	1.50781	MGI:88192	Smarca4	0.75566
MGI:2177191	Bspry	1.50851	MGI:98180	Rrm1	0.755693
MGI:104741	Nfkbia	1.5087	MGI:1919725	Ssbp3	0.755774
MGI:103034	Stat6	1.50991	MGI:1913324	Tmem167	0.755882
MGI:109161	Grk5	1.51123	MGI:2145517	B3galnt2	0.756277
MGI:1914693	Map1lc3b	1.5115	MGI:1913672	Dctpp1	0.756514
MGI:1913340	Ypel3	1.5117	MGI:108177	Dhx9	0.756878
MGI:1321398	F11r	1.51552	MGI:1917110	Eif1ad	0.756905
MGI:103236	Efna1	1.51811	MGI:94890	Dhfr	0.75696
MGI:2143526	Gstt3	1.51831	MGI:88446	Col11a1	0.757367
MGI:1313266	Alcam	1.51861	MGI:1922194	Qtrtd1	0.75737
MGI:103038	Stat3	1.51875	MGI:1858493	B4galt2	0.757392
MGI:1098236	Cast	1.51875	MGI:1919286	Eny2	0.757549
MGI:1922939	Higd1b	1.51932	MGI:104748	Peg3	0.75755
MGI:1914323	Pi4k2b	1.52026	MGI:2445102	Dhx33	0.75758
MGI:1916025	Atp6v1c2	1.5212	MGI:1098219	Hmgb3	0.758181
MGI:1352630	Abcc9	1.52133	MGI:2448526	Gmps	0.758329
MGI:2139628	Ctso	1.52272	MGI:1918842	Pogk	0.758611
MGI:2684916	Ppp1r36	1.52295	MGI:2429950	Xpo6	0.7587
MGI:88271	Cat	1.52382	MGI:1915074	Nmral1	0.758874
MGI:1915050	Dgat2	1.52492	MGI:1920546	Rhobtb3	0.759026
MGI:1914353	Ptgr1	1.52524	MGI:1914709	Nvl	0.759369
MGI:1353652	Tor3a	1.52539	MGI:1926209	Dek	0.759591
MGI:1927899	Mmp19	1.52626	MGI:107188	Arnt2	0.759595
MGI:1925139	Lbh	1.52708	MGI:1928994	Tro	0.759597
MGI:2675603	Trpm6	1.52788	MGI:1333889	Bub1b	0.759816
MGI:88460	Col6a2	1.52804	MGI:1097691	Hdac2	0.759852
MGI:1916203	Chmp2a	1.52829	MGI:2444022	Mapk1ip1l	0.759993
MGI:87964	Agtr1a	1.52857	MGI:1333112	Ran	0.760084
MGI:1858208	Ech1	1.53003	MGI:2384313	Rrp9	0.760478
MGI:1915670	Ankrd13a	1.53047	MGI:1343044	Rbmx	0.760612
MGI:1194500	Ablim1	1.53237	MGI:2385198	Usp1	0.760637
MGI:95537	Ctgf	1.53486	MGI:3039623	Thada	0.760969
MGI:107728	Myo1d	1.53626	MGI:106609	Gpx2	0.761187
MGI:1098623	Acaa2	1.53645	MGI:1855693	Nap1l1	0.761396
MGI:2685174	9430020K01Rik	1.53748	MGI:108390	Kif2a	0.761506
MGI:2141207	Kctd10	1.53776	MGI:5455599	Gm25822	0.761677
MGI:1333864	Mrpl14	1.53776	MGI:1913659	Rsl1d1	0.761851
MGI:107505	Alox5ap	1.53822	MGI:1914176	Trmt6	0.762004
MGI:1914273	Use1	1.53899	MGI:1309466	Gstm5	0.762223
MGI:1915988	Acss1	1.54039	MGI:1919369	Tpx2	0.762349
MGI:1194899	Inpp5k	1.54153	MGI:2443308	Mcph1	0.762481
MGI:88423	Clu	1.54154	MGI:1928488	Akap8	0.762662
MGI:98233	Sat1	1.54198	MGI:1926083	Gins3	0.762702
MGI:98931	Ezr	1.5436	MGI:1919214	Atad3a	0.762722
MGI:96788	Lifr	1.54384	MGI:2181202	Pfkfb3	0.762866
MGI:95456	Ets2	1.54447	MGI:1351825	Cstf3	0.762905
MGI:1933403	Erap1	1.54468	MGI:107940	Ezh2	0.763057
MGI:88459	Col6a1	1.54581	MGI:98834	Trp53	0.763146
MGI:3041177	Taok3	1.5465	MGI:2443487	Trmt61a	0.763191
MGI:97167	Msn	1.5481	MGI:2142116	Psip1	0.763291
MGI:88478	Cpa1	1.54937	MGI:101934	Tfdp1	0.7633
MGI:105925	Cdo1	1.55106	MGI:107444	Efna5	0.763786
MGI:2143990	Parp12	1.5526	MGI:1889642	Elp2	0.764178
MGI:1316648	Ahnak	1.55446	MGI:2385621	Nup153	0.764219
MGI:1913308	Tmem176a	1.55541	MGI:1321393	Timeless	0.764299
MGI:96689	Krt15	1.55701	MGI:1923957	Clasp1	0.764445
MGI:96817	Lox	1.55726	MGI:1334444	Zfpm2	0.764525
MGI:1343124	Hpse	1.55727	MGI:88529	Cs	0.764553
MGI:1310000	Kcnj15	1.55729	MGI:97290	Ndn	0.764953
MGI:2443191	Nceh1	1.55847	MGI:88289	Cbx2	0.764965
MGI:1328314	Matn4	1.55974	MGI:95606	Xrcc6	0.765119
MGI:1861606	Tacstd2	1.55992	MGI:1341823	Fanca	0.765199
MGI:107379	Gstt1	1.56066	MGI:1919834	Cul4b	0.765273
MGI:1915802	Smim14	1.56218	MGI:1918951	Pnpt1	0.765337
MGI:1890410	Acss2	1.56331	MGI:2673709	Kntc1	0.76534
MGI:1339468	S100a10	1.56416	MGI:1921605	Smchd1	0.765395
MGI:1914500	Ube2l6	1.56574	MGI:2384784	Eif4g1	0.765403
MGI:108104	Snrk	1.56723	MGI:95299	Eif2s1	0.765434
MGI:1347474	Foxj1	1.5692	MGI:1342296	Stxbp4	0.765533
MGI:102805	Entpd1	1.56999	MGI:1914933	Pbdc1	0.76578
MGI:2384974	Mfsd7c	1.57026	MGI:4360223	Snora24	0.766128
MGI:2154274	Ehd2	1.57065	MGI:1914295	Riok2	0.766138
MGI:1343184	Samd9l	1.5714	MGI:1914289	Rbm25	0.766169
MGI:1925044	Adamtsl2	1.57225	MGI:1915173	Tceb1	0.766322
MGI:108085	Hpgd	1.57308	MGI:2389091	Rps15a	0.766365
MGI:2669035	Tmc4	1.57765	MGI:97904	Trim27	0.766416
MGI:96240	Hspb1	1.57807	MGI:106478	Eif3b	0.766448
MGI:1353452	Aldh3a2	1.57852	MGI:1922869	Fastkd2	0.766645
MGI:1929278	Tmem59	1.58071	MGI:2654144	Ercc6l	0.766924
MGI:1333743	Mpeg1	1.58076	MGI:2387629	Tardbp	0.76706
MGI:894649	Ppfibp2	1.58126	MGI:105369	Cbx1	0.767401
MGI:96757	Lcn2	1.58159	MGI:2140843	Noc4l	0.767449
MGI:104696	Scnn1b	1.58249	MGI:1929022	Polr1e	0.767564
MGI:1914421	Dram2	1.58279	MGI:2443297	Ccnj	0.767808
MGI:1922813	Dnali1	1.58298	MGI:107912	Ssrp1	0.767812
MGI:1916577	1700007K13Rik	1.58459	MGI:1921355	Gga2	0.768046
MGI:1276112	Cldn5	1.58547	MGI:1919064	Mrps27	0.768047
MGI:1932288	Egln3	1.58595	MGI:97891	Rfc1	0.76818
MGI:1917362	Sft2d2	1.58618	MGI:1201610	Tex9	0.76822
MGI:3652091	Gm14438	1.58646	MGI:1913586	Cenpp	0.768287
MGI:1354381	Tmprss2	1.58793	MGI:1891396	Kirrel	0.768355
MGI:1344426	Esyt1	1.58893	MGI:88025	Ank2	0.768405
MGI:88613	Cyr61	1.58909	MGI:2442563	Naa25	0.768531
MGI:97747	Pparg	1.59122	MGI:98878	Tyms	0.768549
MGI:1338917	S100a1	1.59152	MGI:1338027	Gdf11	0.768567
MGI:105304	Il6ra	1.59425	MGI:2443878	Slc4a7	0.768574
MGI:2146009	Dennd3	1.59796	MGI:1347345	Homer1	0.768597
MGI:96778	Lgals3	1.5991	MGI:104517	Xrcc5	0.768825
MGI:1354388	Spag6	1.59975	MGI:90676	Lsm2	0.768883
MGI:2442910	Fam129b	1.60058	MGI:3616088	Ogdhl	0.769086
MGI:103017	Fcgrt	1.60213	MGI:99486	Clcn5	0.769096
MGI:1926287	Plac1	1.6036	MGI:95730	Galk1	0.76922
MGI:109162	Gpam	1.60463	MGI:1289171	Mettl2	0.769709
MGI:99510	Tmsb4x	1.60466	MGI:1914649	Pdlim7	0.769727
MGI:96829	Lrpap1	1.60479	MGI:1100868	Tbrg4	0.76977
MGI:88574	Cybb	1.60503	MGI:1351500	Nup62	0.770055
MGI:1194503	Atp2a3	1.60633	MGI:1914824	Alg13	0.770079
MGI:1918876	Gimap6	1.60767	MGI:1914389	Mis12	0.770568
MGI:1914098	Fuca2	1.60789	MGI:1933527	Srrt	0.770582
MGI:3606242	Nostrin	1.61258	MGI:1925255	Rrn3	0.771028
MGI:1890662	Slc9a3r2	1.6129	MGI:1915147	Rnmt	0.771169
MGI:1923035	Klhl24	1.61494	MGI:2681124	Urb2	0.771205
MGI:104552	Tns1	1.61532	MGI:2442995	Rbbp8	0.771273
MGI:1915026	Vwa5a	1.61838	MGI:1929237	Pus1	0.771337
MGI:1928895	Isg20	1.61895	MGI:1349478	Zw10	0.77166
MGI:1915110	S100a16	1.61958	MGI:2384945	Samd14	0.771767
MGI:1914675	Eps8l1	1.6204	MGI:1915685	Dpy19l1	0.772416
MGI:2443623	Raver2	1.62096	MGI:104805	Snrpb2	0.772437
MGI:102694	Ptprm	1.62114	MGI:2384836	BC027231	0.772482
MGI:94919	Dpp4	1.62343	MGI:1914339	Psmc6	0.772519
MGI:1914055	Tspan1	1.62354	MGI:1919806	Zfp566	0.7729
MGI:96650	Jup	1.62386	MGI:1928137	Mrps22	0.773084
MGI:2444365	Rapgef5	1.62412	MGI:1914679	Nudcd1	0.773093
MGI:1913464	Rgcc	1.62452	MGI:1349388	Cops7b	0.773903
MGI:1914738	Calcoco1	1.62472	MGI:1914715	Sf3a1	0.773941
MGI:2147043	Rmdn2	1.62481	MGI:98727	Tgfb3	0.773985
MGI:101922	Tnc	1.6253	MGI:1316708	Ifrd2	0.774046
MGI:1924967	6030408B16Rik	1.62602	MGI:1916513	Rfc3	0.774349
MGI:99180	Zfp36	1.62643	MGI:1914582	Snrpd3	0.774583
MGI:95321	Emb	1.62658	MGI:106924	Melk	0.774612
MGI:107941	Emp1	1.63217	MGI:2448480	Fancd2	0.774675
MGI:1923000	Slc10a6	1.6331	MGI:2142810	Ppip5k2	0.775234
MGI:1925225	Tmem50b	1.63339	MGI:98283	Srsf1	0.775343
MGI:1920722	Spata18	1.63704	MGI:2445054	Senp1	0.775469
MGI:1343087	Pdk2	1.63737	MGI:1915033	Ahctf1	0.775706
MGI:1914114	Clec14a	1.63968	MGI:1336880	Eftud2	0.775903
MGI:104754	Sik1	1.63998	MGI:102685	Cdc27	0.775983
MGI:1347095	Cd97	1.64007	MGI:5453746	Gm23969	0.776665
MGI:1923385	Prex2	1.64019	MGI:1923036	Ckap5	0.776865
MGI:1915044	Shisa5	1.64141	MGI:105084	Satb1	0.77695
MGI:97537	Pecam1	1.64354	MGI:1309511	Cdc7	0.777055
MGI:95566	Fn1	1.64356	MGI:1929485	Nif3l1	0.777114
MGI:1916151	Gpr126	1.64367	MGI:1914750	Ccar1	0.777397
MGI:99916	Lamb2	1.64614	MGI:1914515	Slc39a10	0.777421
MGI:1344344	Dazap2	1.64873	MGI:1891690	Syncrip	0.777466
MGI:1922990	Egfem1	1.64884	MGI:88393	Chd1	0.777499
MGI:99480	Cebpa	1.64893	MGI:1929264	Sae1	0.777637
MGI:1922011	Mxra8	1.64943	MGI:2388640	BC005764	0.77769
MGI:1890081	Foxo3	1.65134	MGI:104288	Pms2	0.7778
MGI:1315205	Slit2	1.65176	MGI:99663	Zfp61	0.778233
MGI:88373	Cebpb	1.66033	MGI:1354159	E2f6	0.778323
MGI:1914432	Pdzk1ip1	1.66103	MGI:1352755	Gtse1	0.778401
MGI:1855689	Hpcal1	1.66312	MGI:2443716	Scai	0.778886
MGI:1889842	Fam13a	1.66389	MGI:99461	Piga	0.779259
MGI:1309517	Itm2b	1.6641	MGI:1351502	Nup50	0.779277
MGI:99513	Sdpr	1.6654	MGI:1915246	Srsf6	0.779285
MGI:103576	Ccl11	1.66649	MGI:1916428	Snx5	0.779477
MGI:1098259	Capg	1.66785	MGI:1858497	Igdcc4	0.779696
MGI:700012	Ostf1	1.66805	MGI:1352760	Hdgfrp3	0.779764
MGI:1316658	Cyba	1.66863	MGI:1923547	Kti12	0.779912
MGI:1916318	1810011O10Rik	1.66868	MGI:1919282	Pdxp	0.780017
MGI:1924444	Tmem139	1.6688	MGI:1918049	Cep192	0.780292
MGI:1913975	Lrrk2	1.67011	MGI:1920036	Tdp1	0.780508
MGI:1353450	Aldh1a1	1.67277	MGI:1261425	Drosha	0.780629
MGI:101924	Slc12a2	1.67444	MGI:103248	Phc1	0.780761
MGI:1355315	Tmod3	1.67644	MGI:1933157	Pdzrn3	0.780811
MGI:1098776	Lbp	1.67827	MGI:1099786	Dhx15	0.780875
MGI:106612	Myo1c	1.68141	MGI:1917042	Med6	0.781654
MGI:1346021	Slco2a1	1.6816	MGI:2144013	Xpo1	0.782045
MGI:1926217	Rnase4	1.68338	MGI:2445126	Zcchc11	0.782409
MGI:1919127	Efhc1	1.68518	MGI:1913459	Inip	0.782527
MGI:1347245	Ceacam1	1.68531	MGI:2444491	Heatr3	0.783117
MGI:1918983	Susd2	1.68639	MGI:2442306	Fancm	0.783632
MGI:1914856	Fibin	1.68687	MGI:1861601	Cpsf2	0.784049
MGI:99502	Ltbp2	1.68778	MGI:1913954	Rbm4b	0.784131
MGI:1341297	Dapk2	1.68876	MGI:96245	Hspa9	0.784391
MGI:106621	Myo1e	1.68963	MGI:893579	Khdrbs1	0.784735
MGI:2442485	Myo5c	1.68978	MGI:1924536	Nkrf	0.784996
MGI:1277968	Ptrf	1.69096	MGI:1927170	Spata5	0.786131
MGI:1922783	Nme5	1.69109	MGI:1891925	Hnrnph1	0.786278
MGI:1891834	Nupr1	1.69206	MGI:2147351	Me2	0.786996
MGI:1861441	Rab27a	1.69247	MGI:1919213	Cdca4	0.787322
MGI:1915221	Tppp3	1.69543	MGI:1353611	Sc5d	0.787402
MGI:1919110	Wdr16	1.69799	MGI:1889002	Wdr4	0.787611
MGI:1915116	Wfdc1	1.69934	MGI:1914472	Srfbp1	0.787833
MGI:1201374	Anxa8	1.70097	MGI:2449057	Gars	0.788148
MGI:2146021	Mal2	1.70151	MGI:109339	Eya3	0.788239
MGI:2384850	Pdlim2	1.70613	MGI:1298379	Matr3	0.788414
MGI:105043	Ahr	1.70824	MGI:1914370	Ttc14	0.788592
MGI:1913416	S100a14	1.71087	MGI:3605986	Rad54b	0.78873
MGI:95525	Fgfr4	1.71088	MGI:1913538	Pdcd5	0.788903
MGI:1919277	Slc39a4	1.71089	MGI:1344403	Cfdp1	0.788992
MGI:95403	Stom	1.71133	MGI:95459	Zfp521	0.789795
MGI:96692	Krt18	1.71829	MGI:95543	Fkbp4	0.789935
MGI:109354	Ucp2	1.71915	MGI:2137624	Pom121	0.790296
MGI:1194909	Rsph1	1.72392	MGI:1924386	Cep78	0.79039
MGI:1098283	Per1	1.7242	MGI:1276539	Ttc3	0.790999
MGI:97809	Ptprb	1.72465	MGI:1917294	Tut1	0.791306
MGI:109496	Lgals9	1.72871	MGI:2443132	Lrp12	0.791686
MGI:2387863	Zmynd10	1.72912	MGI:1890563	Wasf1	0.792328
MGI:1315215	Dhrs3	1.73001	MGI:2144727	Ddx1	0.792481
MGI:1338798	S100a11	1.73557	MGI:1924223	Fbxo21	0.792766
MGI:95405	Ephx1	1.73694	MGI:2150037	Mta1	0.792856
MGI:104808	Lcp1	1.73906	MGI:1917646	Asnsd1	0.793425
MGI:88222	Tspo	1.73986	MGI:1913915	Msantd3	0.793575
MGI:106645	Enpep	1.74289	MGI:1860513	Fnbp4	0.793883
MGI:107553	St6galnac2	1.74441	MGI:3039573	Ttll12	0.794221
MGI:1201689	Tapbp	1.74738	MGI:1927865	Zfp280b	0.794303
MGI:1914361	Naaa	1.74943	MGI:1920093	Prdm4	0.794658
MGI:1859778	Hif3a	1.74963	MGI:2387601	BC030867	0.79509
MGI:1931139	Ppp1r14a	1.75514	MGI:103027	Tarbp2	0.795335
MGI:96704	Krt7	1.75698	MGI:2151797	Tgs1	0.79573
MGI:1338946	Acvrl1	1.75781	MGI:1916942	Hddc2	0.795779
MGI:1916579	1700003M02Rik	1.75942	MGI:1914251	Rrp8	0.79616
MGI:99571	Glp1r	1.7609	MGI:1914666	Armcx2	0.796308
MGI:2137237	Fam129a	1.76165	MGI:1917497	Psmd1	0.796459
MGI:106598	Myo5b	1.76307	MGI:3606062	Pcyox1l	0.796744
MGI:108559	Macf1	1.76508	MGI:2384887	Chtf18	0.797985
MGI:99913	Lamc2	1.76823	MGI:1277220	Ccdc86	0.798346
MGI:1923513	Gstk1	1.77075	MGI:2155884	Wdr5	0.798459
MGI:109169	Epas1	1.77178	MGI:1923373	Gpsm2	0.799259
MGI:104737	Cdkn2b	1.77181	MGI:3642815	Gm10139	0.799542
MGI:2448476	Smagp	1.77298	MGI:1915560	Zmym1	0.800074
MGI:1891716	Emcn	1.77624	MGI:106580	Cnot11	0.80058
MGI:1352757	Iqgap1	1.77801	MGI:2178445	Ppan	0.801588
MGI:2142149	Ano1	1.77806	MGI:98347	Snrpn	0.802867
MGI:2685214	Prrg3	1.7793	MGI:1096377	Traip	0.803114
MGI:99915	Lamb3	1.7796	MGI:1914729	Tmem183a	0.803913
MGI:88030	Anxa4	1.78971	MGI:2143977	Mbtd1	0.807
MGI:108420	Nfe2l2	1.79133	MGI:2444748	Chd7	0.80749
MGI:2685837	Mettl21e	1.79134	MGI:99137	Xrcc1	0.809479
MGI:2442582	Ablim3	1.7916	MGI:1931871	Wdr46	0.809713
MGI:108037	Figf	1.79439	MGI:1345669	Gtf2h2	0.810683
MGI:99600	Aldh2	1.80061	MGI:1913499	Pno1	0.811664
MGI:894288	Sepp1	1.80451	MGI:88431	Cnbp	0.818123
MGI:109380	Il10rb	1.80783	MGI:1926784	Tagln3	0.828345
MGI:2384294	Rbm47	1.81747
MGI:2385129	Lrrc26	1.8196
MGI:1931437	Smpdl3a	1.82645
MGI:3039567	Ndufa4l2	1.82832
MGI:104651	Cd82	1.82848
MGI:88057	Apoe	1.83025
MGI:108395	Vnn1	1.83059
MGI:1329004	Slfn5	1.84024
MGI:3039635	Tmem204	1.84149
MGI:1913101	Cldn10	1.84323
MGI:1919124	2310007B03Rik	1.84617
MGI:1858229	Ppp1r3c	1.84832
MGI:1339998	Efemp1	1.85011
MGI:2443026	Ccdc67	1.85015
MGI:1889209	Gipc2	1.85155
MGI:1329044	Cldn3	1.85616
MGI:1913391	Ifitm3	1.85744
MGI:95285	Edn3	1.86073
MGI:1933830	Enpp5	1.86196
MGI:1926609	Trp53inp1	1.86239
MGI:96392	Icam1	1.86435
MGI:1330848	Atp8a1	1.867
MGI:109278	Ogn	1.87016
MGI:1916296	Isca1	1.87073
MGI:109249	Adamts1	1.87244
MGI:107341	Ctss	1.8756
MGI:1929076	Htra1	1.87593
MGI:1919210	Myh14	1.88169
MGI:2138143	AA986860	1.88321
MGI:2135589	Clec2d	1.89673
MGI:1916910	Tmbim1	1.89731
MGI:2146149	Egflam	1.89742
MGI:1919531	Sh2d4a	1.89872
MGI:1921846	Cds1	1.89905
MGI:1890457	Slc15a2	1.89932
MGI:1891827	Gde1	1.90438
MGI:1349467	Abcd2	1.90521
MGI:1914897	4930523C07Rik	1.91011
MGI:1195462	Gfra2	1.91087
MGI:97756	Srgn	1.91643
MGI:1921384	Cyp2s1	1.91719
MGI:104814	Ier3	1.92016
MGI:2144095	Sec14l4	1.93431
MGI:1336882	Vamp8	1.94244
MGI:1349164	Sdc4	1.95245
MGI:1928740	Fads3	1.95354
MGI:5474852	Hbb-bs	1.95974
MGI:1923759	Plet1	1.9638
MGI:1098271	Rgs2	1.96505
MGI:1923810	Prss8	1.96911
MGI:2685813	Fam189a2	1.96923
MGI:2140356	H6pd	1.96931
MGI:88516	Cryab	1.96971
MGI:1920795	1700094D03Rik	1.9714
MGI:1926321	Postn	1.97187
MGI:1349656	Gimap4	1.97457
MGI:88354	Cdh1	1.9755
MGI:1915213	Npc2	1.97932
MGI:95860	Gstm1	1.97972
MGI:2384860	Slc44a3	1.98175
MGI:1915077	Aldh6a1	1.98772
MGI:103222	Zbtb16	1.98982
MGI:2182928	Gpr116	1.98987
MGI:1915130	Dcxr	1.99045
MGI:2442784	Slco4c1	1.9997
MGI:102709	Cav1	2.01858
MGI:1333780	Rps19	2.02397
MGI:88496	Crh	2.02465
MGI:1915561	Lypd2	2.03049
MGI:2444151	Clec1a	2.03076
MGI:1346091	Fbln5	2.03634
MGI:95521	Fgf7	2.03927
MGI:1915587	Crip2	2.04026
MGI:2384812	Lpcat1	2.04149
MGI:891978	Phyh	2.04276
MGI:101842	Pla2g1b	2.04827
MGI:88501	Crip1	2.05461
MGI:98534	Tcn2	2.05487
MGI:104859	Selenbp2	2.05781
MGI:107776	Gadd45b	2.06448
MGI:99909	Lama3	2.072
MGI:3036230	Slc27a6	2.07417
MGI:1917258	Ace2	2.07638
MGI:88246	Anxa2	2.08731
MGI:1918730	8430408G22Rik	2.09788
MGI:98973	Xdh	2.09974
MGI:1339467	S100a6	2.10157
MGI:1338056	Klf5	2.10595
MGI:2446239	Galnt18	2.10603
MGI:96615	Itgb6	2.10901
MGI:1924819	Limch1	2.11496
MGI:96705	Krt8	2.11701
MGI:1352498	Ndrg2	2.12014
MGI:2385287	Spon1	2.1223
MGI:95515	Fgf1	2.1321
MGI:1929940	Bcam	2.14015
MGI:2444679	Tcp11l2	2.14254
MGI:894688	Serpinb6b	2.15347
MGI:104678	Tm4sf1	2.17096
MGI:1916042	Srpx2	2.17668
MGI:1918910	Rarres2	2.1808
MGI:105383	Il18r1	2.19488
MGI:101782	Scnn1a	2.19492
MGI:3606159	Tmem243	2.20078
MGI:1914951	Wfdc2	2.2155
MGI:1921663	Tc2n	2.23139
MGI:88385	Cfh	2.23396
MGI:2155705	P2ry14	2.23677
MGI:2137617	Tinagl1	2.24201
MGI:1346325	Gadd45g	2.24783
MGI:96976	Mgp	2.25005
MGI:5456161	Gm26384	2.25277
MGI:1913625	Dhrs7	2.26117
MGI:2148811	Npnt	2.27372
MGI:1342276	Mfap4	2.27531
MGI:1916523	Mettl7a1	2.28859
MGI:1858203	Rab25	2.2972
MGI:97829	Pygl	2.30601
MGI:1278319	Fpr2	2.30782
MGI:104695	Scnn1g	2.30971
MGI:3781032	Kcnj13	2.31118
MGI:98852	Tst	2.31595
MGI:1202715	Tcf21	2.31697
MGI:1928009	Vsig2	2.33641
MGI:2685104	Akap5	2.33845
MGI:98935	Vldlr	2.34419
MGI:1335079	Elf5	2.34737
MGI:87874	Ace	2.34814
MGI:107489	Phex	2.35088
MGI:102963	Inmt	2.38877
MGI:892970	Mal	2.39066
MGI:107414	Tnfsf10	2.39193
MGI:97171	Mt1	2.39587
MGI:97797	Ptgs1	2.40924
MGI:106686	Pon3	2.41038
MGI:1915419	Ndnf	2.44097
MGI:894696	Serping1	2.44164
MGI:1913850	Mgst1	2.45978
MGI:1859606	Wdr45	2.47113
MGI:1201378	Anxa3	2.47607
MGI:88461	Col6a3	2.47885
MGI:1926944	Calcrl	2.48764
MGI:107571	Cav2	2.50872
MGI:106671	Cdh16	2.51645
MGI:1341799	Ndrg1	2.52142
MGI:2384918	Tspan8	2.52634
MGI:109553	Ctsc	2.52932
MGI:1924772	Tmem213	2.53858
MGI:1916885	Dapk1	2.54665
MGI:97172	Mt2	2.5475
MGI:96819	Anxa1	2.54778
MGI:1917673	Tspan15	2.56768
MGI:1349477	Tinag	2.56997
MGI:88476	Cp	2.57352
MGI:95317	Eln	2.57469
MGI:98754	Timp3	2.57538
MGI:97004	Mme	2.57761
MGI:1270156	Sept4	2.58508
MGI:96882	Ly6c1	2.59503
MGI:96916	Maob	2.60124
MGI:1922715	Dynlrb2	2.6503
MGI:1913945	Aspn	2.65562
MGI:2182619	Lgi3	2.67535
MGI:1889549	Txnip	2.68056
MGI:1929209	Cldn18	2.6992
MGI:96693	Krt19	2.72393
MGI:95851	Gsn	2.74644
MGI:103201	Aqp1	2.75117
MGI:1933754	Nedd4l	2.7661
MGI:1923392	Ppp1r14c	2.77289
MGI:96825	Selenbp1	2.79429
MGI:1858225	Tuba8	2.8046
MGI:1316737	G0s2	2.81577
MGI:1298387	Fhl1	2.82881
MGI:1858599	Egfl6	2.8406
MGI:94917	Dpep1	2.95285
MGI:1888992	Msln	2.98296
MGI:96441	Igfbp6	2.98949
MGI:2145458	Akr1c14	3.01615
MGI:2153480	Atp6v0a4	3.03537
MGI:88348	Cd9	3.03599
MGI:1916316	1810010H24Rik	3.05475
MGI:1918962	Dram1	3.05813
MGI:1917824	Cpm	3.07124
MGI:1351617	Abca3	3.16164
MGI:1315192	Lrrc23	3.181
MGI:109517	Sftpc	3.20639
MGI:1353586	Lmo7	3.28231
MGI:102965	Scn7a	3.38574
MGI:1891250	Gprc5a	3.42907
MGI:96897	Lyz2	3.45013
MGI:88090	Ass1	3.55441
MGI:1928392	Dpt	3.58381
MGI:97231	Muc1	3.68091
MGI:88108	Atp1b1	3.70412
MGI:107899	Cd36	3.74592
MGI:2148202	Ces1d	3.90959
MGI:98919	Scgb1a1	4.08155
MGI:1890216	Slc6a14	4.11417
MGI:1352480	Igfbp7	4.1368
MGI:103562	Hsd11b1	4.17423
MGI:1310002	Fmo1	4.24631
MGI:96902	Lyz1	4.35877
MGI:1098726	Emp2	4.40891
MGI:2146559	AU021092	4.41685
MGI:109365	Napsa	4.50251
MGI:3617848	Sec14l3	4.60369
MGI:1916782	Hopx	4.62506
MGI:2153470	Scgb3a2	4.64547
MGI:1888504	Retnla	5.15817
MGI:1916704	Clic3	5.31965
MGI:96211	Hp	5.39389
MGI:1917912	Clic5	5.72042
MGI:1339941	Cxcl15	5.72548
MGI:109516	Sftpb	6.21836
MGI:88608	Cyp2f2	6.42103
MGI:2441659	Lamp3	6.57469
MGI:107285	Ctsh	6.58466
MGI:893592	Ager	6.99446
MGI:109518	Sftpa1	7.42857
MGI:1916776	Fmo2	9.60731
MGI:107200	Cbr2	11.1497
MGI:1342284	Slc34a2	15.3586

## Sheet: CANvsSAC
UPREGULATED			DOWNREGULATED
MGI_ID	Symbol	FoldChange	MGI_ID	Symbol	FoldChange
MGI:107936	Il18	1.30837	MGI:1859284	Cldn6	0.197185
MGI:107495	Myl7	1.76555	MGI:102889	Vcan	0.295179
MGI:1928009	Vsig2	1.55375	MGI:2448350	Hist1h3i	0.380963
MGI:1921435	Gbe1	1.35334	MGI:96949	Mdk	0.350449
MGI:95415	Erg	1.32881	MGI:1931523	Hist1h1a	0.35149
MGI:2685387	Atp13a3	1.38793	MGI:1915276	2810417H13Rik	0.311888
MGI:1926002	Csgalnact2	1.31394	MGI:88302	Ccnb1	0.382091
MGI:1289196	Rnf213	1.48466	MGI:2448399	Hist1h2bk	0.34519
MGI:1919028	Klhl5	1.28758	MGI:1914203	Cdca7	0.421711
MGI:107423	Numb	1.31	MGI:2448383	Hist1h2bf	0.480363
MGI:1095733	Pros1	1.38666	MGI:1919369	Tpx2	0.433201
MGI:2143558	Chchd10	1.43562	MGI:1100510	Bub1	0.364611
MGI:99418	Itpr2	1.30858	MGI:1338802	Shcbp1	0.411579
MGI:2385159	Ccm2l	1.33582	MGI:1860374	Mad2l1	0.427245
MGI:2448556	Stard8	1.3357	MGI:2146335	C330027C09Rik	0.440983
MGI:2444628	Sh3rf2	1.30142	MGI:108069	Ccna2	0.463952
MGI:2684972	Fhdc1	1.33586	MGI:1913099	Psrc1	0.457177
MGI:109553	Ctsc	1.57551	MGI:2448425	Hist1h4f	0.478693
MGI:2652132	Pttg1ip	1.34193	MGI:1201682	Kif20a	0.406173
MGI:1917362	Sft2d2	1.37686	MGI:104820	Hnrnpa1	0.503797
MGI:2385244	Tmem150a	1.41626	MGI:106924	Melk	0.443819
MGI:109235	Itpkb	1.38759	MGI:1333889	Bub1b	0.407283
MGI:104913	Abi1	1.28476	MGI:1889208	Cks1b	0.419305
MGI:98483	Tap1	1.38469	MGI:97757	Prim1	0.414312
MGI:97769	Prnp	1.38457	MGI:1289156	Pbk	0.421999
MGI:1919277	Slc39a4	1.44372	MGI:1338889	Uhrf1	0.343663
MGI:1927655	Ggcx	1.35808	MGI:1298227	Mcm6	0.450669
MGI:1861431	Clec7a	1.38937	MGI:98790	Top2a	0.433457
MGI:104540	Clec3b	1.55944	MGI:1933184	Nop58	0.484265
MGI:1919127	Efhc1	1.53536	MGI:97621	Plk1	0.440089
MGI:98388	Sptbn1	1.34036	MGI:95281	Ect2	0.476547
MGI:2444310	Fsd2	1.26759	MGI:88423	Clu	0.408225
MGI:2389007	Hydin	1.38093	MGI:1921054	Kif2c	0.412904
MGI:1918962	Dram1	1.67884	MGI:1924093	Dtl	0.418486
MGI:1096866	Chad	1.31978	MGI:1919069	Kif23	0.472852
MGI:1929459	Rabgef1	1.29686	MGI:1100850	Capn6	0.44617
MGI:1915932	Slc44a2	1.40422	MGI:96269	Ranbp1	0.484041
MGI:1922208	4930485B16Rik	1.38223	MGI:1861461	Hist1h1b	0.464078
MGI:2387586	Tenc1	1.37123	MGI:1351663	Skp2	0.426544
MGI:1931054	Slc43a3	1.32778	MGI:2448404	Hist1h2bm	0.467669
MGI:1336882	Vamp8	1.49472	MGI:1098230	Cenpe	0.48101
MGI:1922806	1700026D08Rik	1.489	MGI:88311	Ccnb2	0.47967
MGI:2140371	Rusc2	1.28893	MGI:1890648	Fignl1	0.376269
MGI:2147274	Arap3	1.35767	MGI:105380	Mcm2	0.456101
MGI:1920249	Insig2	1.32946	MGI:1289298	Knstrn	0.488386
MGI:2685303	Gimap8	1.32778	MGI:1314881	Chaf1b	0.468267
MGI:1889842	Fam13a	1.4031	MGI:1916966	Trip13	0.444177
MGI:97072	Gbp4	1.54929	MGI:2384982	Cdca7l	0.421337
MGI:1932288	Egln3	1.59644	MGI:1349423	Racgap1	0.459484
MGI:96602	Itga3	1.38178	MGI:101845	Mcm3	0.395759
MGI:96778	Lgals3	1.60609	MGI:106209	Hells	0.387797
MGI:104993	Lepr	1.39423	MGI:3590554	BC055324	0.467487
MGI:88342	Cd68	1.34709	MGI:106067	Smc2	0.492236
MGI:1927185	Chp1	1.31366	MGI:1921019	Gins2	0.521218
MGI:1923927	Pcmtd2	1.38015	MGI:1930197	Ncapg	0.421788
MGI:1914962	Slc25a37	1.89766	MGI:2448297	Hist1h2ak	0.501093
MGI:104650	Cnr2	1.29334	MGI:1913510	Tmem54	0.52683
MGI:2663511	Reps2	1.35182	MGI:96795	Lmnb1	0.46218
MGI:1196616	Rbpjl	1.4202	MGI:102688	H2afx	0.471936
MGI:106183	Ocln	1.35883	MGI:103197	Mcm5	0.420059
MGI:95896	H2-D1	1.63893	MGI:1914321	Rps6ka6	0.51238
MGI:1890602	Gabarapl2	1.41023	MGI:1202065	Chek1	0.424524
MGI:1919212	Gatsl3	1.31486	MGI:2448388	Hist1h2bj	0.488116
MGI:104670	Fkbp5	1.36981	MGI:1334448	Aspm	0.49831
MGI:1914738	Calcoco1	1.41838	MGI:1341163	Tacc3	0.486379
MGI:88208	Bsg	1.36049	MGI:1333112	Ran	0.519168
MGI:1859606	Wdr45	1.53821	MGI:1915097	Sncaip	0.53519
MGI:2655574	Ostm1	1.33227	MGI:1923714	Casc5	0.483295
MGI:1277133	Phf11d	1.3594	MGI:2141625	Nup205	0.547661
MGI:1921356	Dcaf6	1.32516	MGI:99660	Pola1	0.498884
MGI:2142292	Mtmr10	1.32758	MGI:1203524	Smarcc1	0.529536
MGI:2449569	Adamts15	1.34467	MGI:88351	Cdk1	0.496264
MGI:95537	Ctgf	1.51099	MGI:2448423	Hist1h4d	0.519257
MGI:1923920	Ttc18	1.47797	MGI:2448377	Hist1h2bb	0.508556
MGI:2384789	Tmem63a	1.34671	MGI:1196260	Hn1l	0.477923
MGI:2389008	Adamtsl4	1.33625	MGI:1298388	Umps	0.488508
MGI:2446134	Sidt2	1.3932	MGI:2444576	Kif20b	0.498241
MGI:1920551	Ttc29	1.38687	MGI:88350	Cdc25c	0.515255
MGI:88413	Ckm	1.61039	MGI:103199	Mcm4	0.44887
MGI:106687	Pon2	1.39617	MGI:1298398	Mcm7	0.43204
MGI:1914128	Riok3	1.34219	MGI:1202069	Cdk2ap1	0.462512
MGI:96820	Lpl	1.64521	MGI:107812	Tubb5	0.555504
MGI:1890216	Slc6a14	1.67787	MGI:96437	Igfbp2	0.399135
MGI:1355312	C1s	1.66075	MGI:2448419	Hist1h4a	0.516382
MGI:105940	Renbp	1.41362	MGI:88357	Cdk4	0.566225
MGI:107363	Stxbp1	1.26518	MGI:107168	Aurkb	0.478489
MGI:1919410	Tmem163	1.36593	MGI:1315198	Cdca3	0.484624
MGI:99513	Sdpr	1.56666	MGI:1920174	Anln	0.517611
MGI:2444343	Nbeal1	1.40922	MGI:1919405	Cenpn	0.472596
MGI:1919619	Ehd4	1.49895	MGI:109233	Kif22	0.480401
MGI:1915130	Dcxr	1.50971	MGI:101789	Lig1	0.469066
MGI:1096360	Cd151	1.32235	MGI:98878	Tyms	0.527207
MGI:1918910	Rarres2	1.62669	MGI:2444300	Arhgap11a	0.489587
MGI:1917649	Wwtr1	1.47085	MGI:1859866	Cdc20	0.519706
MGI:1916051	Elovl5	1.40865	MGI:1349427	Exo1	0.484128
MGI:1924444	Tmem139	1.43991	MGI:1861727	Dkc1	0.499194
MGI:2137648	Ifi30	1.40979	MGI:98180	Rrm1	0.480595
MGI:1925860	Uvrag	1.29998	MGI:2146571	Rfc4	0.512626
MGI:1919100	Clip4	1.42733	MGI:1915099	Cdca5	0.493993
MGI:103151	Pltp	1.55473	MGI:2443514	Wdhd1	0.466156
MGI:95713	Gja1	1.43531	MGI:1313302	Cenpf	0.507738
MGI:96930	Mcc	1.32576	MGI:1914384	Nop56	0.494772
MGI:104597	Tnnt2	1.63021	MGI:3041235	Ska3	0.475761
MGI:2443895	Fry	1.31323	MGI:1914427	Cdt1	0.495268
MGI:2442473	Rhbdf2	1.40161	MGI:1914227	Nuf2	0.487305
MGI:109618	Atp6v1b2	1.34023	MGI:1914879	Spc24	0.540698
MGI:1920635	Fam177a	1.50186	MGI:88375	Cenpa	0.550631
MGI:2157899	Tmem37	1.41738	MGI:2448326	Hist1h3e	0.505137
MGI:2685720	Acss3	1.49591	MGI:104537	Brca1	0.500556
MGI:1855700	Pcdh12	1.3577	MGI:1098258	Kif15	0.476232
MGI:104991	Mxd4	1.3431	MGI:1927470	Spag5	0.513292
MGI:1916042	Srpx2	1.48695	MGI:1919401	Rfc5	0.529599
MGI:1916823	Hilpda	1.44258	MGI:95490	Fbn2	0.417458
MGI:2443191	Nceh1	1.43822	MGI:3647120	Gm16379	0.428453
MGI:1098283	Per1	1.46498	MGI:894678	Aurka	0.505903
MGI:1861231	Clec4n	1.45368	MGI:2448306	Hist1h2ab	0.449474
MGI:1890081	Foxo3	1.42128	MGI:1355328	Nasp	0.483397
MGI:1917676	Tekt5	1.401	MGI:1098231	Kif11	0.457718
MGI:2443999	Pde8b	1.33974	MGI:88451	Col18a1	0.555353
MGI:2443086	Fam63b	1.3882	MGI:1921291	4632434I11Rik	0.491248
MGI:3590652	Txlng	1.34566	MGI:106035	Mki67	0.471682
MGI:97231	Muc1	1.618	MGI:1351352	Atic	0.521869
MGI:96534	Cd74	1.39055	MGI:1919787	Cdca2	0.518521
MGI:2443388	Kdm7a	1.41996	MGI:97503	Pcna	0.540771
MGI:1202715	Tcf21	1.51556	MGI:1922567	Parpbp	0.529442
MGI:98912	Upk1b	1.70642	MGI:1913835	Snrnp40	0.598347
MGI:99600	Aldh2	1.48498	MGI:1328364	Fmod	0.324415
MGI:1919924	Adipor1	1.41078	MGI:109274	Trim28	0.540912
MGI:1098236	Cast	1.3978	MGI:2448407	Hist1h2bn	0.521508
MGI:2442894	Cobll1	1.31574	MGI:2443149	Gen1	0.518782
MGI:96788	Lifr	1.40459	MGI:1916513	Rfc3	0.573673
MGI:2444274	Ccdc108	1.44397	MGI:2673709	Kntc1	0.561221
MGI:107484	Rgl1	1.3427	MGI:1919890	Mex3a	0.55881
MGI:1926562	Gucy1a3	1.30619	MGI:96434	Igf2	0.565534
MGI:1913308	Tmem176a	1.47784	MGI:103576	Ccl11	0.480286
MGI:1918006	Dock4	1.41505	MGI:1916520	Gins1	0.523679
MGI:88179	Bmp3	1.33273	MGI:94890	Dhfr	0.564349
MGI:3039578	Ecm2	1.35796	MGI:1919128	Fam83d	0.570063
MGI:105305	Slc1a5	1.37617	MGI:1339951	Cse1l	0.590183
MGI:2675603	Trpm6	1.40784	MGI:97890	Rad51	0.462129
MGI:2676556	Akap13	1.36358	MGI:1934811	Nucks1	0.510572
MGI:107553	St6galnac2	1.44208	MGI:1913390	Ska2	0.581343
MGI:1922011	Mxra8	1.43711	MGI:95543	Fkbp4	0.614389
MGI:95662	Gata2	1.39516	MGI:1919665	Sgol1	0.532286
MGI:107744	Dnah6	1.47649	MGI:1915326	Dnajc9	0.576369
MGI:1889818	Tspan12	1.38009	MGI:1926232	Srsf7	0.559746
MGI:103039	Stat2	1.3999	MGI:1915548	Ncapd2	0.464457
MGI:1343184	Samd9l	1.55373	MGI:107912	Ssrp1	0.559584
MGI:1098718	Tmem38b	1.46485	MGI:1196274	Cdca8	0.528294
MGI:2384986	Rnf144b	1.36523	MGI:1915074	Nmral1	0.574467
MGI:98941	Vwf	1.47401	MGI:108389	Kif4	0.484349
MGI:1352757	Iqgap1	1.42863	MGI:1196391	Pole	0.508869
MGI:1916145	Rasl11a	1.37019	MGI:109372	Cbx5	0.53654
MGI:1922813	Dnali1	1.52189	MGI:97357	Mycn	0.572188
MGI:1101353	Klf10	1.37193	MGI:2444529	Dctd	0.482462
MGI:2441773	Pcmtd1	1.34158	MGI:1339939	Rpa2	0.543086
MGI:88454	Col4a1	1.4876	MGI:1349448	Cenph	0.453303
MGI:2442252	Lrp4	1.39837	MGI:2183453	Dlgap5	0.508016
MGI:99682	Tmbim6	1.41247	MGI:102551	Ccnf	0.500839
MGI:97267	Myl4	1.74967	MGI:1919096	Syce2	0.58458
MGI:1859682	Slc23a2	1.35284	MGI:1194921	Ttk	0.497424
MGI:96603	Itga4	1.39008	MGI:1914582	Snrpd3	0.600649
MGI:108563	Sirpa	1.33797	MGI:2145099	Mis18bp1	0.520649
MGI:1889385	Crebl2	1.34282	MGI:1917722	Atad2	0.503078
MGI:2687281	Fam105a	1.4576	MGI:1919238	Esco2	0.559936
MGI:1933113	Gpr146	1.33249	MGI:1914162	Bzw2	0.536984
MGI:88459	Col6a1	1.48095	MGI:97801	Pth1r	0.560572
MGI:96765	Ldlr	1.4812	MGI:103075	Wee1	0.546755
MGI:1925543	Tbcel	1.34076	MGI:1341044	Alyref	0.585493
MGI:106321	Dock9	1.39577	MGI:104904	Tead2	0.576521
MGI:1196377	Tnfaip3	1.33982	MGI:1917162	Nup43	0.540917
MGI:98263	Ccl6	1.43243	MGI:1914391	Fbxo5	0.5065
MGI:88341	Cd53	1.60847	MGI:98181	Rrm2	0.505822
MGI:1931595	Nfkbiz	1.38696	MGI:1914928	Lsm3	0.587619
MGI:1914618	Fam154b	1.3835	MGI:1915264	Zwilch	0.503848
MGI:1349453	Vsnl1	1.49876	MGI:103180	Tcf19	0.564138
MGI:97723	Pnliprp1	1.59816	MGI:2155936	Pask	0.597643
MGI:1860040	Trim3	1.43986	MGI:1343961	Msh6	0.57847
MGI:107741	Pvr	1.40561	MGI:1338073	Cdc45	0.554703
MGI:1914701	Pkp2	1.39616	MGI:97831	Ppa1	0.507311
MGI:2143990	Parp12	1.40634	MGI:5313075	Gm20628	0.556488
MGI:1913359	Tspan13	1.39144	MGI:95891	H19	0.627912
MGI:1917700	Unc13d	1.32928	MGI:1923294	Ncapg2	0.503339
MGI:97999	Ros1	1.45309	MGI:1096361	Hn1	0.591285
MGI:99450	Ifit1	1.49438	MGI:2443767	Aaas	0.570742
MGI:2685715	Heca	1.42495	MGI:104667	Hmmr	0.530039
MGI:97631	Pmp22	1.48106	MGI:94912	Dnmt1	0.532316
MGI:102709	Cav1	1.62076	MGI:1918325	Rimklb	0.492995
MGI:1346042	Mgll	1.44081	MGI:1914179	Asf1b	0.512245
MGI:1344313	Zeb1	1.36771	MGI:1926264	Tspan6	0.628814
MGI:2153044	Elmo1	1.39465	MGI:1915031	Ilf2	0.607338
MGI:109249	Adamts1	1.48684	MGI:1913820	Cenpm	0.590514
MGI:1339759	Csf2rb	1.35182	MGI:103029	Mdk-ps1	0.56066
MGI:2442213	Plekha1	1.38538	MGI:1355330	Phgdh	0.532179
MGI:2384914	Appl2	1.35438	MGI:107682	Ppp1r14b	0.579575
MGI:1345961	Coro1a	1.41203	MGI:1097163	Pold2	0.569166
MGI:1351317	Podxl	1.42057	MGI:95487	Fbln1	0.568781
MGI:1929691	Slc15a3	1.34981	MGI:107940	Ezh2	0.589131
MGI:3036264	Syde2	1.41039	MGI:1929264	Sae1	0.583721
MGI:1913850	Mgst1	1.66997	MGI:1924434	Fam64a	0.552362
MGI:1916577	1700007K13Rik	1.57769	MGI:94852	Oaf	0.644639
MGI:88329	Cd34	1.42902	MGI:1203517	Birc5	0.563439
MGI:106689	Selplg	1.33683	MGI:3039376	Dnph1	0.502839
MGI:104581	Gnb4	1.39616	MGI:97550	Pfn2	0.543829
MGI:1921935	4930451C15Rik	1.46359	MGI:1914338	Cand2	0.600237
MGI:1353450	Aldh1a1	1.80796	MGI:1098767	Sgol2	0.584667
MGI:1349721	Tob1	1.43205	MGI:1920037	Ndc1	0.507074
MGI:1337120	Slc7a7	1.41835	MGI:1197514	Pole2	0.576454
MGI:109161	Grk5	1.46573	MGI:1339973	Ilf3	0.596065
MGI:2685104	Akap5	1.85635	MGI:106920	Tmpo	0.621789
MGI:96629	Jak2	1.34328	MGI:108177	Dhx9	0.600407
MGI:1270860	Plscr2	1.52801	MGI:1915862	Ube2c	0.574276
MGI:105376	Adam9	1.35867	MGI:1918362	Zranb3	0.600743
MGI:2447165	Cmtm6	1.33456	MGI:1196294	Fubp1	0.580869
MGI:1201374	Anxa8	1.57567	MGI:1917672	Ints2	0.608719
MGI:1916885	Dapk1	1.51529	MGI:1924261	Ticrr	0.531203
MGI:1916774	Esam	1.46902	MGI:1917274	Mcm10	0.545653
MGI:1916193	Pink1	1.40648	MGI:1916066	Ppil1	0.621434
MGI:1915802	Smim14	1.36306	MGI:2384887	Chtf18	0.662621
MGI:1918876	Gimap6	1.43681	MGI:98344	Snrpd1	0.648221
MGI:2139461	Tmem62	1.44939	MGI:98535	Tcp1	0.652007
MGI:97844	Rab3d	1.38244	MGI:109130	Stip1	0.602873
MGI:1321398	F11r	1.47742	MGI:2444496	Prr11	0.63928
MGI:104754	Sik1	1.53252	MGI:2684977	Cym	0.248738
MGI:1923784	Osbpl9	1.35485	MGI:894684	Pa2g4	0.587279
MGI:1352462	Nr1h3	1.48518	MGI:98284	Srsf2	0.570054
MGI:95484	Fas	1.43662	MGI:101834	Tubg1	0.641992
MGI:104696	Scnn1b	1.59245	MGI:107804	Tuba1b	0.516114
MGI:3505790	Fcho2	1.35267	MGI:2384790	Fanci	0.599081
MGI:1915667	Ccdc17	1.57397	MGI:1340806	Parp1	0.54906
MGI:103266	Fgl2	1.39837	MGI:88356	Cdh3	0.598172
MGI:96567	Impdh1	1.43938	MGI:2442600	Adamts18	0.60627
MGI:99571	Glp1r	1.66971	MGI:2444777	Ncaph	0.566609
MGI:1914145	Pxdc1	1.37992	MGI:104517	Xrcc5	0.554789
MGI:98663	Tef	1.39767	MGI:1306799	D17H6S56E-5	0.551811
MGI:1891228	Scel	1.37798	MGI:1926210	Cenpk	0.535989
MGI:96617	Cd47	1.37509	MGI:2144566	Tsr1	0.542023
MGI:1916524	Ctdspl	1.42585	MGI:1917716	Ckap2l	0.586972
MGI:95485	Fasn	1.56248	MGI:2144013	Xpo1	0.646577
MGI:2444594	Slc26a9	1.52803	MGI:1921571	Tipin	0.515822
MGI:2661375	Rtn4rl1	1.36809	MGI:1330294	Hnrnpab	0.652466
MGI:108559	Macf1	1.53826	MGI:1923381	Depdc1a	0.542896
MGI:2387609	Tmem63b	1.4748	MGI:1920018	Topbp1	0.597811
MGI:2443818	Arhgap29	1.39522	MGI:103071	Rangap1	0.588711
MGI:106498	D4Wsu53e	1.53287	MGI:96013	Hat1	0.561309
MGI:2444210	Nr1d1	1.31802	MGI:101783	Plk4	0.613053
MGI:1314883	Tnfrsf1b	1.3891	MGI:2143854	Nup107	0.572239
MGI:1916800	Bst2	1.6347	MGI:1918764	Sfpq	0.618916
MGI:1924105	Slc17a5	1.39928	MGI:1914346	Mmachc	0.655569
MGI:1860485	Plek	1.43641	MGI:1336880	Eftud2	0.616653
MGI:1343094	Kat2b	1.33297	MGI:1858961	Prc1	0.55184
MGI:2686961	Inpp5a	1.42257	MGI:1353621	Zfp354c	0.609125
MGI:2135756	Hspb8	1.65255	MGI:88316	Ccne1	0.552333
MGI:1917824	Cpm	1.61245	MGI:1913692	Spc25	0.532886
MGI:1891123	Kcne2	1.32221	MGI:2444826	Vash2	0.589705
MGI:98779	Tnnc1	1.64637	MGI:2443496	Sertad4	0.61938
MGI:1310004	Fmo5	1.47215	MGI:1328362	Blm	0.539001
MGI:1313258	Slfn2	1.52209	MGI:107846	Prmt1	0.551333
MGI:1929899	Sqrdl	1.49398	MGI:1343044	Rbmx	0.622047
MGI:1859650	Ramp2	1.40027	MGI:1890471	Pcbp4	0.609911
MGI:1346016	Arhgef28	1.43304	MGI:1914297	Rars	0.660369
MGI:96892	Lyn	1.41683	MGI:1915528	Ddx39	0.615058
MGI:1926051	Ak7	1.57288	MGI:1913393	Eef1e1	0.607844
MGI:109572	Tuft1	1.42257	MGI:1891925	Hnrnph1	0.652629
MGI:107718	Dnah5	1.49519	MGI:1917822	Ipo5	0.605296
MGI:95704	Ggta1	1.39917	MGI:3641930	Gm16494	0.638229
MGI:2152187	Cyyr1	1.57267	MGI:2147897	Cenpi	0.578517
MGI:1914188	Sh3d21	1.42398	MGI:1914473	Rrp15	0.643917
MGI:104678	Tm4sf1	1.6072	MGI:1918944	Ipo9	0.598984
MGI:1915058	Tprgl	1.36472	MGI:1921357	Cep55	0.586754
MGI:1341803	Lipg	1.51036	MGI:1888908	Aldh18a1	0.562317
MGI:2139628	Ctso	1.39186	MGI:97402	Odc1	0.549813
MGI:1916937	Ypel5	1.41818	MGI:1347487	Foxm1	0.549342
MGI:2148896	Palmd	1.43757	MGI:107914	Tia1	0.588189
MGI:102965	Scn7a	1.98786	MGI:3645633	Gm5803	0.566328
MGI:3036245	Ralgapa2	1.41426	MGI:99690	Pola2	0.591485
MGI:95515	Fgf1	1.50384	MGI:2145895	Slc38a1	0.54824
MGI:1926262	Irgm2	1.51934	MGI:2384588	Neil3	0.586631
MGI:2443264	9330182L06Rik	1.51164	MGI:1313288	Incenp	0.577539
MGI:1309516	Tpst2	1.39841	MGI:1918780	Gas2l3	0.556342
MGI:1913819	Gdpd1	1.51158	MGI:2141989	Grwd1	0.59412
MGI:108405	Apbb2	1.38077	MGI:3641865	Gm10357	0.62348
MGI:1858959	Elovl1	1.40399	MGI:1914287	Pmf1	0.646278
MGI:97810	Ptprc	1.45411	MGI:1343045	Rbmxl1	0.594369
MGI:2144765	Pld4	1.40425	MGI:106653	Epcam	0.639268
MGI:103159	Cish	1.4112	MGI:1918401	Eri2	0.616084
MGI:1309517	Itm2b	1.39999	MGI:98283	Srsf1	0.6095
MGI:1289230	Pxk	1.34638	MGI:102690	Srm	0.563778
MGI:1927468	Samhd1	1.38201	MGI:1914199	Trim59	0.548307
MGI:98534	Tcn2	1.54604	MGI:1919054	Mtfr2	0.673728
MGI:1270855	Il16	1.37998	MGI:1916231	Snrpa1	0.586707
MGI:1918770	Grap	1.53655	MGI:103300	Rbl1	0.606634
MGI:96745	Lamp1	1.36562	MGI:95486	Fbl	0.573371
MGI:88478	Cpa1	1.49065	MGI:2448309	Hist1h2af	0.58821
MGI:109603	Cmklr1	1.48564	MGI:1349645	Islr	0.633451
MGI:104719	Ndst1	1.50349	MGI:1922038	E2f8	0.611958
MGI:1920591	Arhgef6	1.45992	MGI:2145541	Hist1h3g	0.614966
MGI:104528	S100g	1.7015	MGI:98763	Tk1	0.621778
MGI:102858	Fosl2	1.38817	MGI:1920546	Rhobtb3	0.637808
MGI:1914148	Baiap2l1	1.42889	MGI:5477374	Gm26880	0.393591
MGI:1858500	Diap2	1.44162	MGI:1914371	Mastl	0.607409
MGI:2135589	Clec2d	1.62312	MGI:2448300	Hist1h2an	0.571844
MGI:2442367	Slc13a4	1.42811	MGI:1913586	Cenpp	0.670626
MGI:1922725	Oplah	1.46845	MGI:1924015	Mlec	0.638806
MGI:107815	Pfkfb2	1.41219	MGI:104708	Cct3	0.622978
MGI:1915221	Tppp3	1.80256	MGI:2448295	Hist1h2ah	0.533736
MGI:96599	Itga1	1.4271	MGI:3525201	Mdc1	0.617262
MGI:1920352	Slc22a23	1.45541	MGI:2448320	Hist1h3c	0.533403
MGI:99532	Mef2a	1.45644	MGI:3036286	Arhgef39	0.655398
MGI:1194899	Inpp5k	1.50374	MGI:2654144	Ercc6l	0.612069
MGI:87964	Agtr1a	1.47292	MGI:1860267	Set	0.647795
MGI:1313266	Alcam	1.46923	MGI:3646589	Gm5396	0.581008
MGI:1923513	Gstk1	1.59991	MGI:894697	Rad54l	0.552678
MGI:1277238	Wdr52	1.6043	MGI:107634	Larp7	0.607205
MGI:1277180	Ifi27	1.43761	MGI:1920924	Wdr75	0.625349
MGI:1916704	Clic3	1.887	MGI:2444465	Frem2	0.596405
MGI:2145021	Trib2	1.45247	MGI:1928902	Rqcd1	0.576691
MGI:104651	Cd82	1.45895	MGI:2146156	Espl1	0.625379
MGI:2449923	Egfl7	1.47663	MGI:1914492	Gemin6	0.627838
MGI:1920048	Lhfp	1.47877	MGI:1328321	Bex1	0.509567
MGI:1917347	Sash1	1.41787	MGI:1346322	Gpc6	0.52602
MGI:1923930	5330417C22Rik	1.63195	MGI:1351320	Trp53bp1	0.67375
MGI:1921663	Tc2n	1.78658	MGI:1916889	Exosc8	0.589445
MGI:88348	Cd9	1.63065	MGI:1913672	Dctpp1	0.625526
MGI:98725	Tgfb1	1.37226	MGI:1919784	Rcc2	0.598974
MGI:95403	Stom	1.52786	MGI:1913828	Mis18a	0.652104
MGI:87989	Alas1	1.39936	MGI:2142116	Psip1	0.630237
MGI:1351618	Dnajb9	1.49099	MGI:2446977	Kif18a	0.589591
MGI:3039635	Tmem204	1.56914	MGI:2445153	Clspn	0.561037
MGI:97600	Prkch	1.39728	MGI:2448480	Fancd2	0.61265
MGI:104808	Lcp1	1.60413	MGI:3603594	Flrt2	0.548802
MGI:96824	Tlr4	1.43687	MGI:1914933	Pbdc1	0.66123
MGI:107776	Gadd45b	1.61162	MGI:108396	Dtymk	0.596494
MGI:1344426	Esyt1	1.50845	MGI:1353633	Fus	0.579439
MGI:1926063	Nckap1l	1.40368	MGI:1277122	Rcn3	0.636261
MGI:106206	Nrp1	1.48783	MGI:3605986	Rad54b	0.641496
MGI:1915077	Aldh6a1	1.60129	MGI:108048	Smyd5	0.605228
MGI:108074	Sptlc2	1.46367	MGI:1915337	Dcakd	0.667544
MGI:107474	Cd38	1.47865	MGI:1309511	Cdc7	0.664575
MGI:2385644	Ms4a6c	1.53908	MGI:3833934	Gm16314	0.654301
MGI:3645893	Gm6166	2.01444	MGI:106181	Mybbp1a	0.569304
MGI:101769	Mcl1	1.36633	MGI:2443198	Slitrk6	0.601915
MGI:1345144	Spry4	1.47669	MGI:107183	Cct8	0.643552
MGI:1927339	Mpp5	1.41756	MGI:103232	Grb10	0.622901
MGI:1913662	Arrdc4	1.4671	MGI:1351328	Dbf4	0.616682
MGI:1915795	Ecscr	1.5253	MGI:3648847	Gm5940	0.61243
MGI:98729	Tgfbr2	1.47538	MGI:1346051	Dut	0.631552
MGI:1933754	Nedd4l	1.6676	MGI:1924994	Bora	0.584335
MGI:1917363	Odf3b	1.56475	MGI:1918001	6330403K07Rik	0.567118
MGI:98223	Saa3	1.76146	MGI:1917704	Cenpl	0.641299
MGI:1915882	Myct1	1.51858	MGI:1194505	C1qbp	0.621167
MGI:2151841	Ppp1r16b	1.52745	MGI:97143	Marcksl1	0.477613
MGI:1925638	Mvp	1.48777	MGI:1918335	Arhgap19	0.589185
MGI:104661	Rora	1.39752	MGI:2181182	Nup155	0.607107
MGI:1923035	Klhl24	1.48696	MGI:98510	Tcf3	0.669002
MGI:2444679	Tcp11l2	1.68741	MGI:1345150	Cdc6	0.620658
MGI:1345162	Adam23	1.33908	MGI:101934	Tfdp1	0.603354
MGI:1278336	Cdkl5	1.47583	MGI:1914735	Pwp1	0.650198
MGI:107166	Vipr2	1.45994	MGI:105369	Cbx1	0.685113
MGI:1346878	Map3k8	1.35251	MGI:1926462	Hnrnph3	0.660699
MGI:1915670	Ankrd13a	1.53669	MGI:1914878	Anp32b	0.625806
MGI:108384	Btg2	1.55554	MGI:1354175	Txnrd1	0.576796
MGI:1196458	Scarb2	1.52865	MGI:1351331	Chaf1a	0.639229
MGI:2156378	Rnf39	1.41049	MGI:1351645	Prmt5	0.641168
MGI:1858261	Slc7a10	1.59158	MGI:3710580	Gm9800	0.653055
MGI:2388479	Ppp2r5a	1.48985	MGI:2448386	Hist1h2bg	0.587559
MGI:2146149	Egflam	1.53405	MGI:1931797	Ckap2	0.581206
MGI:1914099	Ppp1r2	1.54889	MGI:107943	Cct6a	0.631393
MGI:2446239	Galnt18	1.58479	MGI:2384875	Cdk5rap2	0.677532
MGI:1921384	Cyp2s1	1.7611	MGI:3028642	Iqgap3	0.620056
MGI:108409	Rgs4	1.99514	MGI:98834	Trp53	0.65767
MGI:1919735	Ccdc141	1.52509	MGI:2138811	Cdc123	0.70504
MGI:1289279	Dnah9	1.52271	MGI:3037658	H2afy2	0.601561
MGI:2153470	Scgb3a2	2.13785	MGI:2448387	Hist1h2bh	0.614328
MGI:96650	Jup	1.54573	MGI:1889642	Elp2	0.665345
MGI:1347356	Adamts2	1.47006	MGI:1341868	Rfc2	0.657564
MGI:1933117	Parp9	1.46617	MGI:1927241	Wdr12	0.643896
MGI:99844	Gem	1.53198	MGI:95276	Epha7	0.573762
MGI:1920325	Ppil6	1.59478	MGI:2446979	Kif18b	0.623288
MGI:2148811	Npnt	1.6143	MGI:1919765	Wdr43	0.635771
MGI:1336186	Agpat3	1.43107	MGI:1915434	Denr	0.680643
MGI:99685	Ryr2	1.43343	MGI:1100851	Elavl1	0.697301
MGI:1916034	Prickle1	1.42625	MGI:1355274	Uchl3	0.609536
MGI:1196429	Atg13	1.38383	MGI:1919055	Nup93	0.598969
MGI:1098243	Ifnar2	1.41022	MGI:104592	Myef2	0.664768
MGI:95716	Gja5	1.55791	MGI:1929485	Nif3l1	0.652567
MGI:97167	Msn	1.50016	MGI:2442836	Brip1	0.644724
MGI:1923195	Tmem56	1.61166	MGI:98285	Srsf3	0.625169
MGI:1915254	Tmem9b	1.41592	MGI:2448526	Gmps	0.657258
MGI:1924311	4931406P16Rik	1.46845	MGI:1919862	2700029M09Rik	0.675454
MGI:99180	Zfp36	1.61362	MGI:1099440	Suv39h1	0.63687
MGI:3652166	Ldlrad1	1.39443	MGI:105053	Hsph1	0.600826
MGI:1354952	Dkk3	1.44543	MGI:1913444	Pycrl	0.674915
MGI:95496	Fcer1g	1.46971	MGI:102897	Pcsk6	0.578903
MGI:3605620	Gbp9	1.59633	MGI:2442925	Atad5	0.596903
MGI:2155600	Myh7	1.8247	MGI:1859631	Pdgfc	0.510353
MGI:96969	Met	1.61962	MGI:2144727	Ddx1	0.675622
MGI:107655	Ifngr1	1.46674	MGI:2448322	Hist1h3d	0.687532
MGI:2384812	Lpcat1	1.77658	MGI:2442620	Nup133	0.648638
MGI:97283	Ncf1	1.69395	MGI:1930187	Maged1	0.680468
MGI:3027894	Rsph4a	1.59274	MGI:1277103	Nudcd2	0.621379
MGI:1921895	Fam46c	1.95171	MGI:1890476	Rad18	0.632382
MGI:1891250	Gprc5a	1.91471	MGI:95654	Gart	0.595677
MGI:108021	Ear1	1.66797	MGI:2158400	Wdr18	0.67399
MGI:96428	Ifi203	1.49737	MGI:97758	Prim2	0.635269
MGI:109326	Bnip3	1.54262	MGI:108075	Smo	0.661963
MGI:105057	Cdh5	1.55443	MGI:2684980	Mms22l	0.594762
MGI:2445082	Pamr1	1.51331	MGI:1933527	Srrt	0.654599
MGI:108085	Hpgd	1.93053	MGI:97286	Ncl	0.675557
MGI:109528	Trpc1	1.39982	MGI:109337	Brca2	0.655919
MGI:1921846	Cds1	1.67175	MGI:1890948	Supt16	0.61701
MGI:2183535	Cytip	1.49684	MGI:1918049	Cep192	0.676215
MGI:1339998	Efemp1	1.5523	MGI:1916974	Rnaseh2a	0.675165
MGI:107543	Sox17	1.6205	MGI:1194912	Rbbp4	0.724252
MGI:1920795	1700094D03Rik	1.86018	MGI:2385133	Exosc2	0.604469
MGI:1921280	Rin2	1.50902	MGI:107795	Hnrnpc	0.647905
MGI:1921436	Ccdc3	1.49781	MGI:1351500	Nup62	0.647007
MGI:2443049	D230025D16Rik	1.62868	MGI:104864	Pdia4	0.63849
MGI:97744	Por	1.49077	MGI:1917715	Wdr77	0.639332
MGI:102772	Gbp2	1.51682	MGI:1353651	Gnl3	0.607864
MGI:99557	Pde4b	1.52576	MGI:2675669	Nusap1	0.61215
MGI:96590	Irf1	1.50226	MGI:98822	Tfrc	0.629527
MGI:1929474	Cyp2d22	1.40459	MGI:1098547	Nhp2	0.66103
MGI:1913340	Ypel3	1.53796	MGI:1346330	Banf1	0.675661
MGI:1920722	Spata18	1.77304	MGI:107188	Arnt2	0.660419
MGI:98731	Tgm2	1.6254	MGI:1918248	Phf6	0.606407
MGI:107381	Epha1	1.49603	MGI:1919822	Spats2	0.677913
MGI:102694	Ptprm	1.54123	MGI:1916238	Prpf31	0.645367
MGI:3039567	Ndufa4l2	1.63135	MGI:102779	Fen1	0.578442
MGI:2669035	Tmc4	1.65467	MGI:1855692	Nono	0.715632
MGI:2149821	Hsd17b11	1.56267	MGI:1919912	Dis3	0.601229
MGI:1194500	Ablim1	1.51204	MGI:2448443	Hist4h4	0.63675
MGI:96683	Kdr	1.60759	MGI:97250	Myc	0.578756
MGI:2444188	Dgkh	1.45897	MGI:2448302	Hist1h2ao	0.48875
MGI:1355313	C1ra	1.50273	MGI:1926465	Hnrnpm	0.673745
MGI:1914125	Swt1	1.4071	MGI:1913659	Rsl1d1	0.690383
MGI:1925915	2016-03-02	1.68565	MGI:1859016	Ddah2	0.723302
MGI:97172	Mt2	2.39737	MGI:1926186	Wdr76	0.623867
MGI:88226	C2	1.45821	MGI:1914410	Eef1g	0.688503
MGI:1330848	Atp8a1	1.68386	MGI:1341823	Fanca	0.69041
MGI:1339467	S100a6	1.70822	MGI:1353460	Fkbp3	0.596299
MGI:1333857	Arhgap31	1.56095	MGI:1917152	Mrto4	0.657203
MGI:1346091	Fbln5	1.6937	MGI:1927222	Diap3	0.624531
MGI:1916014	Cdhr3	1.51364	MGI:1100512	Mre11a	0.647965
MGI:1201787	Socs2	1.49634	MGI:2137302	B3gnt5	0.606456
MGI:1353452	Aldh3a2	1.50112	MGI:2142364	Hirip3	0.649669
MGI:95558	Flt1	1.47175	MGI:1914302	Ndc80	0.65713
MGI:1346049	Hs2st1	1.5162	MGI:99240	Ddx39b	0.681051
MGI:1924214	2610028H24Rik	1.4885	MGI:1925901	Lsm6	0.655368
MGI:1915026	Vwa5a	1.52014	MGI:1913884	Mcm8	0.634977
MGI:2151075	Tnfrsf21	1.45625	MGI:1925141	Ube2s	0.655332
MGI:1349656	Gimap4	1.58563	MGI:1917164	Ints4	0.694025
MGI:1346318	Klf6	1.54331	MGI:1913775	Timm50	0.694611
MGI:2443100	Bend7	1.53189	MGI:1915082	Brix1	0.679404
MGI:97520	Pcx	1.76251	MGI:108414	Pafah1b3	0.713978
MGI:1859353	Mkrn1	1.67922	MGI:96242	Hspd1	0.544929
MGI:3650036	Gm13244	1.58122	MGI:1917433	Dzip3	0.646298
MGI:97537	Pecam1	1.55639	MGI:1346035	Farsb	0.691088
MGI:1861728	Wwp1	1.45794	MGI:1915201	Tubb6	0.626878
MGI:97583	Pik3r1	1.58266	MGI:3826572	Gm16302	0.556847
MGI:2135954	Nkd1	1.58515	MGI:2684864	Pfas	0.65055
MGI:1914897	4930523C07Rik	1.66919	MGI:1916969	Cad	0.5646
MGI:2444661	4933426M11Rik	1.47088	MGI:2444298	G2e3	0.678716
MGI:97809	Ptprb	1.62424	MGI:88496	Crh	0.511414
MGI:1345281	Slc30a1	1.42497	MGI:2387629	Tardbp	0.66188
MGI:1916025	Atp6v1c2	1.58937	MGI:97891	Rfc1	0.658082
MGI:96910	Maff	1.60129	MGI:1855690	Snrpa	0.701918
MGI:1926609	Trp53inp1	1.57706	MGI:1926017	Efcab11	0.675625
MGI:2385331	Stard13	1.54807	MGI:1919907	2700094K13Rik	0.601241
MGI:97004	Mme	1.90977	MGI:1924315	Ints7	0.651459
MGI:1921405	Errfi1	1.53497	MGI:2442071	Gprasp2	0.667261
MGI:1926134	Zdhhc3	1.54373	MGI:1920036	Tdp1	0.673075
MGI:1352480	Igfbp7	1.94172	MGI:1923036	Ckap5	0.681022
MGI:104295	Sla	1.44225	MGI:95729	Gli3	0.644174
MGI:88455	Col4a2	1.63338	MGI:1352745	Fscn1	0.663304
MGI:88106	Atp1a2	1.53708	MGI:1914394	Lrrc40	0.656187
MGI:1888707	St3gal6	1.50023	MGI:1919999	Tonsl	0.726785
MGI:107285	Ctsh	1.95918	MGI:2685830	Nsl1	0.630934
MGI:1097714	Bhlhe40	1.68242	MGI:109610	Enc1	0.551315
MGI:1919154	Paqr7	1.44114	MGI:1351465	G3bp1	0.663432
MGI:97528	Pdgfb	1.5298	MGI:1931051	Noc2l	0.679515
MGI:104737	Cdkn2b	1.78653	MGI:1914184	Dsn1	0.660989
MGI:2148202	Ces1d	2.13022	MGI:893586	Nhp2l1	0.708403
MGI:2670995	Trp53i11	1.51241	MGI:2442521	5830418K08Rik	0.735428
MGI:1340024	Aldh1l1	1.59004	MGI:1195458	Abce1	0.688147
MGI:2158641	Cyp4f13	1.40025	MGI:1931148	Nme4	0.677855
MGI:107720	Dnah12	1.64947	MGI:1916604	Slc38a4	0.597556
MGI:1915166	Ppap2b	1.56	MGI:2448316	Hist2h2ac	0.646741
MGI:1914500	Ube2l6	2.03218	MGI:2444418	Scara3	0.661204
MGI:1338859	P2rx4	1.59683	MGI:1916867	Pitrm1	0.632634
MGI:1924375	Il33	1.79682	MGI:1917580	Bclaf1	0.683787
MGI:1310002	Fmo1	2.1198	MGI:1861453	Actl6a	0.665861
MGI:700012	Ostf1	1.51951	MGI:2442377	Ipo11	0.674288
MGI:1097711	Degs1	1.39914	MGI:3046173	Nup85	0.668122
MGI:1923777	Il34	1.52395	MGI:3042273	Nsfl1c	0.667808
MGI:2158925	Inpp4b	1.52209	MGI:1261847	Vrk1	0.670877
MGI:3588195	Adamts17	1.67025	MGI:1313314	Cldn4	0.692597
MGI:1315215	Dhrs3	1.70961	MGI:97355	Nme1	0.581441
MGI:103573	Cebpd	1.73612	MGI:1347092	Zfp146	0.657001
MGI:1329025	Edil3	1.57864	MGI:1913781	Cmc2	0.691854
MGI:1914103	Pnpla2	1.53481	MGI:2156864	Phf5a	0.689502
MGI:2447362	Slc24a4	1.60314	MGI:95606	Xrcc6	0.633536
MGI:1352501	Bcar3	1.45486	MGI:2146005	Mtbp	0.612142
MGI:2138143	AA986860	1.74642	MGI:2685821	Hjurp	0.562054
MGI:106612	Myo1c	1.61675	MGI:105047	Psmc5	0.704519
MGI:1859307	Unc93b1	1.43955	MGI:1915347	Dynll2	0.687772
MGI:105367	Il4ra	1.47225	MGI:101947	Hnrnpd	0.659401
MGI:99480	Cebpa	1.65718	MGI:109352	Ung	0.713672
MGI:1914421	Dram2	1.62846	MGI:2140750	Zfp518b	0.658848
MGI:1923560	Steap4	1.57855	MGI:2146855	Nrm	0.65701
MGI:109365	Napsa	2.0703	MGI:1914743	Mettl16	0.701131
MGI:3772572	Xaf1	1.41919	MGI:1933378	Pole3	0.721531
MGI:109232	Npas2	1.4832	MGI:98400	Srd5a1	0.68082
MGI:104677	Man1a	1.60032	MGI:106908	Srpk1	0.656375
MGI:103017	Fcgrt	1.49416	MGI:1918019	Nolc1	0.65556
MGI:109380	Il10rb	1.59152	MGI:1914192	Ddx18	0.68482
MGI:104637	Tgfbr3	1.58191	MGI:1926159	Mdn1	0.63715
MGI:3649253	Gm13233	1.69662	MGI:1924059	Bri3bp	0.694046
MGI:1338946	Acvrl1	1.69622	MGI:1913721	Anp32e	0.639102
MGI:1097695	Ezh1	1.4512	MGI:101816	Msh2	0.650408
MGI:104741	Nfkbia	1.57473	MGI:1917895	Oip5	0.613923
MGI:2655401	Scgb1c1	1.60207	MGI:1917689	Taf15	0.683034
MGI:2385287	Spon1	2.1113	MGI:2387203	Ppat	0.661555
MGI:99782	Nt5e	1.458	MGI:1915342	Ncbp2	0.699531
MGI:1197007	Birc3	1.4878	MGI:107532	Kpnb1	0.666766
MGI:1916782	Hopx	2.15449	MGI:88314	Ccnd2	0.660779
MGI:1349462	Uba7	1.54181	MGI:1916229	Nol11	0.657194
MGI:1923017	Rab11fip1	1.65304	MGI:1891396	Kirrel	0.674959
MGI:98935	Vldlr	1.67627	MGI:1923373	Gpsm2	0.721227
MGI:1931295	Rab27b	1.49411	MGI:103198	Cdc25a	0.61234
MGI:2442184	Flcn	1.47095	MGI:107477	Stil	0.624937
MGI:2140839	Lrrc8c	1.50755	MGI:2445121	Slfn9	0.670577
MGI:1891716	Emcn	1.59567	MGI:1915451	Ccdc34	0.660733
MGI:1933118	Pgam2	1.67178	MGI:1922523	Pelp1	0.698032
MGI:88057	Apoe	1.93008	MGI:97741	Pold1	0.656604
MGI:1916318	1810011O10Rik	1.71651	MGI:2384584	Rfwd3	0.662447
MGI:1316648	Ahnak	1.57977	MGI:1923389	Haus6	0.617468
MGI:2661416	Snx13	1.52327	MGI:1919030	Isyna1	0.694747
MGI:104814	Ier3	2.17334	MGI:107470	Lyar	0.693377
MGI:2685410	Tmem212	1.59783	MGI:1346870	Map2k6	0.661021
MGI:1933155	Arl4d	1.58167	MGI:2145425	Depdc1b	0.641806
MGI:2387597	Gabrp	1.82588	MGI:98737	Thbs1	0.570872
MGI:1344373	Ubl3	1.40536	MGI:1289341	Sf3b3	0.669303
MGI:96974	Kitl	1.68429	MGI:1919964	Nup37	0.662205
MGI:2139014	Osbpl6	1.49343	MGI:1920460	Nup54	0.690481
MGI:1921409	Acbd5	1.54099	MGI:1891840	Ncbp1	0.673963
MGI:1917977	Rasgef1a	1.48975	MGI:1922869	Fastkd2	0.709007
MGI:2450529	Pilra	1.50834	MGI:90675	Vars	0.627365
MGI:893578	Scarb1	1.51492	MGI:99605	Cntfr	0.650273
MGI:1354184	Nox4	1.6395	MGI:1914453	Nde1	0.649562
MGI:1858179	Nucb2	1.5246	MGI:1916214	Ctc1	0.67895
MGI:1917360	Ifi35	1.54234	MGI:108515	Cbx3	0.680688
MGI:107505	Alox5ap	1.61131	MGI:1917195	Fndc4	0.690053
MGI:1098272	Rnasel	1.50127	MGI:3651787	Gm11847	0.581598
MGI:109162	Gpam	1.63567	MGI:1913356	Smpx	0.599674
MGI:1298407	Tspan7	1.64596	MGI:2385198	Usp1	0.65622
MGI:1916296	Isca1	1.81204	MGI:1276574	Whsc1	0.628819
MGI:1891258	Parp3	1.46052	MGI:96250	Hsp90aa1	0.650045
MGI:2147039	Stap2	1.51097	MGI:1096393	Snai2	0.676909
MGI:1916943	Pof1b	1.50839	MGI:2444926	Ckap4	0.715646
MGI:104552	Tns1	1.67938	MGI:106643	Efna4	0.748977
MGI:2388271	Mylip	1.64216	MGI:1347469	Foxl1	0.629257
MGI:1920819	Vgll3	1.61738	MGI:96832	Lsp1	0.651628
MGI:1913192	Fhl5	1.60422	MGI:106381	D10Wsu102e	0.693097
MGI:1341799	Ndrg1	1.98456	MGI:2385237	Aimp2	0.690187
MGI:1915116	Wfdc1	1.75949	MGI:103149	Uchl1	0.606401
MGI:97756	Srgn	1.8389	MGI:1891692	Hnrnpr	0.694072
MGI:2384974	Mfsd7c	1.60722	MGI:1925983	Troap	0.685058
MGI:894688	Serpinb6b	1.9785	MGI:104559	Rcn1	0.734404
MGI:104687	Col4a4	1.55392	MGI:2178445	Ppan	0.732926
MGI:2448476	Smagp	1.70993	MGI:1916996	Znhit6	0.710486
MGI:1352498	Ndrg2	1.83999	MGI:109359	Nek2	0.656211
MGI:2135625	Glrx	1.66313	MGI:96245	Hspa9	0.661596
MGI:3041177	Taok3	1.53383	MGI:1927167	Morf4l2	0.678965
MGI:87990	Alas2	2.40213	MGI:3043381	Kank4	0.72173
MGI:3580629	Ugt1a6b	1.62981	MGI:1343091	Hdac3	0.71386
MGI:2385825	Plekhb2	1.56439	MGI:2385076	Haus1	0.693888
MGI:2443755	Rasgef1b	1.66968	MGI:893579	Khdrbs1	0.68354
MGI:1100819	Aff1	1.52468	MGI:1343463	Bub3	0.652501
MGI:99655	Prdm1	1.48151	MGI:1316728	Gspt1	0.651902
MGI:1926321	Postn	1.70791	MGI:1202295	Entpd6	0.713609
MGI:98754	Timp3	2.0326	MGI:1918893	4930422G04Rik	0.693754
MGI:2137356	Trim16	1.54641	MGI:1914621	Gtf3c6	0.692716
MGI:1277151	Snca	2.09755	MGI:108070	Zik1	0.7266
MGI:95321	Emb	1.9068	MGI:1929285	Orc6	0.653002
MGI:95739	Glul	1.56557	MGI:1913898	Tpgs2	0.7114
MGI:107930	Pip5k1b	1.66014	MGI:1890396	Suv39h2	0.654921
MGI:98775	Tmod1	1.82193	MGI:2684993	Cytl1	0.385214
MGI:1921771	Ppp4r4	1.64682	MGI:1915301	Nutf2	0.697531
MGI:107728	Myo1d	1.57058	MGI:1928098	Tspan3	0.671676
MGI:97171	Mt1	2.24391	MGI:1344408	Pebp1	0.659397
MGI:1354713	Acsl4	1.58736	MGI:95393	Eno1	0.707042
MGI:1859149	Epb4.1l4b	1.55058	MGI:1917708	2610318N02Rik	0.635519
MGI:2136348	Lyve1	1.92361	MGI:1931527	Hist1h1e	0.663505
MGI:95775	Gnao1	1.47025	MGI:98738	Thbs2	0.640315
MGI:104556	Cdkn1a	1.81873	MGI:1915246	Srsf6	0.679442
MGI:1919599	Dusp3	1.59155	MGI:1919174	Tube1	0.694259
MGI:1915748	Tspan11	1.5906	MGI:1922088	Naa15	0.661872
MGI:96789	Lipa	1.53523	MGI:96796	Lmnb2	0.67531
MGI:1098615	Kank3	1.56863	MGI:1346084	Rpp40	0.730683
MGI:96611	Itgb2	1.58218	MGI:108063	Siah1b	0.724077
MGI:1916948	Slc52a3	1.59262	MGI:1289147	E2f7	0.675948
MGI:95283	Edn1	2.12723	MGI:1100514	Pnn	0.702189
MGI:2442784	Slco4c1	1.73969	MGI:1354692	Lsm4	0.639174
MGI:1918836	Ifih1	1.68967	MGI:894652	Usp10	0.631416
MGI:95317	Eln	2.20117	MGI:1914803	Gstcd	0.72261
MGI:96551	Il2rg	1.65223	MGI:1917497	Psmd1	0.707966
MGI:1347245	Ceacam1	1.78474	MGI:1343458	Trip6	0.744527
MGI:2448587	Ccdc153	1.71957	MGI:97572	Phb	0.684449
MGI:1347095	Cd97	1.74162	MGI:1329034	Ccne2	0.60029
MGI:1916316	1810010H24Rik	2.08604	MGI:2142989	Ncapd3	0.678595
MGI:1353652	Tor3a	1.77802	MGI:1342292	Hspa4	0.718589
MGI:102811	Lmo2	1.44914	MGI:2157785	Peg10	0.584153
MGI:1922939	Higd1b	1.76359	MGI:107739	Casp3	0.690176
MGI:1929897	Clstn2	1.53492	MGI:104816	Hnrnpl	0.723623
MGI:1349457	Serinc3	1.62344	MGI:1351657	Abcf2	0.700461
MGI:103038	Stat3	1.65023	MGI:1338016	Ngfrap1	0.711816
MGI:1338917	S100a1	1.79538	MGI:2443590	Ddx11	0.665549
MGI:1333743	Mpeg1	1.94078	MGI:3643448	Gm7931	0.623243
MGI:1914055	Tspan1	1.80346	MGI:98341	Snrnp70	0.654804
MGI:1914939	Aldh3b1	1.47857	MGI:97960	Rnps1	0.664555
MGI:104783	Atxn1	1.67123	MGI:1922312	Sf3a3	0.659398
MGI:95660	Gas6	1.60251	MGI:1929092	Rbm14	0.675779
MGI:99440	Cd33	1.5071	MGI:2138069	Hmgn3	0.70545
MGI:2138391	Pid1	1.55457	MGI:107236	Lsg1	0.722433
MGI:2142610	Snx25	1.62725	MGI:1860295	Ftsj3	0.65053
MGI:98734	Tgtp1	2.32462	MGI:1096584	Psmd2	0.710192
MGI:107443	Fpr1	1.90524	MGI:1917349	Smc4	0.659554
MGI:109561	Sp100	1.58778	MGI:2150020	Rad51c	0.712248
MGI:95904	H2-K1	1.78586	MGI:1339986	Mettl1	0.643474
MGI:2442858	Ddx58	1.65533	MGI:1099786	Dhx15	0.728043
MGI:1916439	1810033B17Rik	1.66382	MGI:1343101	Kat2a	0.708823
MGI:1919210	Myh14	1.88931	MGI:2447819	2610524H06Rik	0.66895
MGI:104859	Selenbp2	1.98144	MGI:1919357	Dscc1	0.67614
MGI:894288	Sepp1	1.82789	MGI:1923452	Zdhhc2	0.689247
MGI:2685837	Mettl21e	2.00497	MGI:2441982	Aldh5a1	0.704664
MGI:1917786	Qpct	1.88923	MGI:1858195	Hnrnpu	0.710741
MGI:1918983	Susd2	1.97483	MGI:107252	Nsun2	0.711816
MGI:105043	Ahr	1.73264	MGI:2448536	Pdap1	0.732191
MGI:102952	Dgka	1.66661	MGI:3576783	Eme1	0.676139
MGI:2140356	H6pd	1.64879	MGI:1933391	Maged2	0.685264
MGI:98821	Trf	4.68563	MGI:1913129	Rbm8a	0.725475
MGI:2384860	Slc44a3	1.76303	MGI:2147810	Tmem132a	0.681134
MGI:2446181	Slc37a1	1.65651	MGI:1276539	Ttc3	0.739863
MGI:2145995	Amigo2	1.50804	MGI:1930140	Wdr6	0.672737
MGI:1913464	Rgcc	2.21706	MGI:1096340	E2f3	0.665055
MGI:1916910	Tmbim1	1.81932	MGI:1929864	Myg1	0.751973
MGI:3603344	Ankrd37	2.03288	MGI:1923580	Sephs1	0.71196
MGI:1890662	Slc9a3r2	1.77177	MGI:1321393	Timeless	0.678557
MGI:1270156	2016-09-04	1.84835	MGI:1858230	Sart3	0.701572
MGI:109516	Sftpb	2.48534	MGI:1919103	Pdia6	0.729692
MGI:88090	Ass1	2.37541	MGI:2155399	Polq	0.662913
MGI:1353586	Lmo7	2.11212	MGI:1915315	Rhno1	0.693675
MGI:1926031	Zc3hav1	1.58229	MGI:2141959	Alg8	0.688529
MGI:2685591	Kcnrg	1.67554	MGI:104680	Hspe1	0.643495
MGI:1344333	Mid2	1.57288	MGI:1349478	Zw10	0.687758
MGI:97612	Plaur	1.58154	MGI:2679294	Zc4h2	0.737414
MGI:1918730	8430408G22Rik	2.38377	MGI:1349392	H2afy	0.706992
MGI:1931437	Smpdl3a	1.72638	MGI:1919367	Naa50	0.677736
MGI:108174	Prkg1	1.62305	MGI:1919213	Cdca4	0.735693
MGI:1196284	Tsc22d3	1.68202	MGI:1932610	Noc3l	0.69186
MGI:2443510	Tacc1	1.61075	MGI:1096397	Polr1a	0.662725
MGI:95860	Gstm1	1.80672	MGI:90676	Lsm2	0.689171
MGI:1888504	Retnla	4.38466	MGI:1347009	Psma5	0.719087
MGI:1345092	Pglyrp1	1.87322	MGI:1345186	Blmh	0.71536
MGI:95851	Gsn	2.01992	MGI:1928994	Tro	0.765469
MGI:1923000	Slc10a6	1.89866	MGI:1915297	Mpnd	0.762076
MGI:893592	Ager	2.70552	MGI:1921763	Neto2	0.63371
MGI:96615	Itgb6	1.81888	MGI:1915208	U2surp	0.711418
MGI:99448	Ifi47	1.84142	MGI:1289274	Krr1	0.72238
MGI:1891340	Lpin1	1.75011	MGI:1858234	Caprin1	0.735457
MGI:1351481	Pdk4	1.86202	MGI:1926185	Saal1	0.721745
MGI:1277098	Ptp4a3	1.57447	MGI:1923481	Igsf10	0.693701
MGI:1914323	Pi4k2b	1.82327	MGI:2677480	Thoc6	0.728856
MGI:1261783	Fam49a	1.73988	MGI:1914389	Mis12	0.703156
MGI:88271	Cat	1.64449	MGI:3651006	Gm14150	0.713352
MGI:88608	Cyp2f2	2.82604	MGI:1194508	Ddost	0.719683
MGI:2146559	AU021092	2.44704	MGI:106184	Npm1	0.693271
MGI:107567	Irgm1	1.64267	MGI:2137677	Sfxn1	0.624599
MGI:95958	H2-T24	1.75895	MGI:106247	Prpf19	0.741892
MGI:1927406	Herpud1	1.66202	MGI:2143333	Exog	0.701639
MGI:99441	Ckmt1	1.91961	MGI:1931838	Dbn1	0.701421
MGI:1929988	Klf15	1.75824	MGI:1349409	Cops3	0.733147
MGI:96394	Icam2	1.7137	MGI:2385096	Pprc1	0.724805
MGI:2685174	9430020K01Rik	1.7752	MGI:1923691	Daam2	0.702704
MGI:99951	Mafk	1.50596	MGI:2147870	Lrch2	0.671288
MGI:1333856	Klf9	1.56409	MGI:2448558	Fancb	0.699949
MGI:88253	Car8	2.07544	MGI:98346	Snrpe	0.614475
MGI:96965	Mertk	1.69806	MGI:97791	Ptbp1	0.678098
MGI:1201689	Tapbp	1.73051	MGI:1917135	Aunip	0.651497
MGI:1917951	Nipal1	1.93288	MGI:88042	Apex1	0.704176
MGI:1202304	Gnmt	2.07557	MGI:1913208	Carm1	0.679634
MGI:1341297	Dapk2	1.80868	MGI:2443370	Chtf8	0.733848
MGI:2137617	Tinagl1	1.97615	MGI:104819	Hnrnpa2b1	0.742713
MGI:1915703	Gpihbp1	1.73145	MGI:90169	Dhrs4	0.73603
MGI:2153480	Atp6v0a4	2.15729	MGI:2446190	Nup188	0.723459
MGI:96825	Selenbp1	2.23885	MGI:1347005	Psma1	0.726048
MGI:108046	Laptm5	1.73432	MGI:1915465	Fam98b	0.709059
MGI:101790	Fabp5	2.15729	MGI:1921355	Gga2	0.743724
MGI:109341	Eya2	1.52797	MGI:1933744	Cenpq	0.694961
MGI:1349467	Abcd2	1.95833	MGI:1919736	Rnf219	0.686828
MGI:1097712	Npc1	1.73605	MGI:1353499	Baz1b	0.678863
MGI:1855691	Map3k6	1.54913	MGI:1934569	Cpxm1	0.708742
MGI:2385017	Nrbp2	1.57337	MGI:1351326	Nrk	0.725175
MGI:107527	Ly6a	2.61473	MGI:1338850	Mthfd2	0.686827
MGI:1201690	Map6	1.51468	MGI:1920916	Thoc3	0.678566
MGI:1928144	Plekha2	1.63672	MGI:1923457	Tmem98	0.752449
MGI:1890410	Acss2	1.71958	MGI:96777	Lgals1	0.679046
MGI:107341	Ctss	1.99137	MGI:1270839	Cacybp	0.719565
MGI:97608	Serpine1	2.02523	MGI:1921605	Smchd1	0.718449
MGI:1201785	Fxyd5	1.83714	MGI:1354164	Hspa14	0.68652
MGI:1929628	Rsad2	2.22504	MGI:1926268	Mrpl37	0.741288
MGI:103562	Hsd11b1	2.58773	MGI:1924836	Mthfd1l	0.665209
MGI:1923385	Prex2	1.95524	MGI:1915889	Smyd2	0.70348
MGI:1889209	Gipc2	1.94171	MGI:2685899	Zcwpw1	0.737397
MGI:2146322	Deptor	1.5751	MGI:1913789	Xpo5	0.713135
MGI:2441659	Lamp3	2.73712	MGI:96157	Hmgb2	0.529429
MGI:1100870	Gcnt2	1.58607	MGI:106014	Nudc	0.718158
MGI:1196990	Cd200	1.78898	MGI:2685307	H1fx	0.724592
MGI:2442111	Ppm1k	1.73936	MGI:1917665	2610018G03Rik	0.704083
MGI:101863	Aldoc	1.87139	MGI:103097	Anapc1	0.710793
MGI:1921371	Acoxl	1.98574	MGI:1926790	Fzr1	0.744971
MGI:106651	Ly6e	2.57781	MGI:3649924	Gm13237	0.648722
MGI:105383	Il18r1	2.0942	MGI:1100863	Kpna3	0.697611
MGI:1859212	Irf7	1.80803	MGI:88192	Smarca4	0.684928
MGI:1916523	Mettl7a1	2.09398	MGI:1914729	Tmem183a	0.751515
MGI:1924712	Tmem116	1.66256	MGI:2137218	Mrpl13	0.694917
MGI:1351867	Slco3a1	1.75162	MGI:104685	Twist2	0.78543
MGI:1351617	Abca3	2.07564	MGI:2384863	Tbl3	0.68151
MGI:2146049	Tmem71	1.7386	MGI:1913989	Rcc1	0.690977
MGI:88607	Cyp2e1	1.83701	MGI:1098622	Rif1	0.689218
MGI:98179	Rras	1.79596	MGI:2445193	Utp6	0.735203
MGI:102896	Sult1a1	1.91466	MGI:1891824	Acin1	0.724838
MGI:1917604	Secisbp2l	1.78384	MGI:104896	Srsf9	0.733965
MGI:1916776	Fmo2	2.76725	MGI:1914489	Rpf2	0.729832
MGI:1891834	Nupr1	2.39137	MGI:2145953	Kdelr3	0.706853
MGI:1928895	Isg20	1.94686	MGI:2140843	Noc4l	0.713776
MGI:109523	Trpc6	1.7953	MGI:1913948	Cpsf6	0.71203
MGI:894696	Serping1	1.94713	MGI:1913842	Stoml2	0.737216
MGI:3781032	Kcnj13	2.28231	MGI:2155884	Wdr5	0.719647
MGI:109137	Rasgrf2	1.56347	MGI:1347343	Usp5	0.69734
MGI:1344382	Creg1	1.71383	MGI:2147427	Wdr74	0.746603
MGI:1921377	Krt80	1.95123	MGI:97175	Map2	0.739512
MGI:2685813	Fam189a2	2.23436	MGI:2684931	Tbc1d31	0.721414
MGI:1354756	Crim1	1.69031	MGI:107862	Nop16	0.712946
MGI:1928765	Scube2	1.75765	MGI:2448439	Hist1h4k	0.643211
MGI:105304	Il6ra	1.79038	MGI:1351511	Psmd7	0.747674
MGI:1924819	Limch1	2.00572	MGI:1890596	Evc	0.737309
MGI:95566	Fn1	2.04957	MGI:2137215	Mrpl11	0.695081
MGI:101842	Pla2g1b	2.27222	MGI:1915525	Rpa1	0.687372
MGI:109169	Epas1	2.08652	MGI:3643356	Rpsa-ps2	0.744309
MGI:99403	Adora2b	1.60701	MGI:109638	Clns1a	0.737275
MGI:107571	Cav2	2.04431	MGI:109367	Impdh2	0.566183
MGI:894680	Bach1	1.62682	MGI:1924188	Rbm17	0.716856
MGI:1913520	Fam134b	1.71913	MGI:1916956	Lrr1	0.668544
MGI:102700	Itga7	1.76003	MGI:2139369	Rtel1	0.717371
MGI:1922019	Pik3cb	1.68212	MGI:2140113	Hist2h4	0.690403
MGI:1925044	Adamtsl2	2.11354	MGI:1097691	Hdac2	0.73077
MGI:1917723	Rapgef4	1.62465	MGI:1860263	Psmg1	0.703734
MGI:105080	Tgoln1	1.70744	MGI:1934754	Kars	0.717288
MGI:2444365	Rapgef5	1.85433	MGI:1919272	Slc35f2	0.606353
MGI:1923759	Plet1	2.1664	MGI:108476	Fzd3	0.685623
MGI:101836	Traf1	1.70865	MGI:1926227	Nup160	0.717281
MGI:94917	Dpep1	2.69383	MGI:2442483	Usp37	0.684655
MGI:1278319	Fpr2	2.37763	MGI:1098219	Hmgb3	0.666548
MGI:105102	Gpx3	2.38333	MGI:1313312	Khdrbs3	0.744884
MGI:107704	Abcg1	1.64182	MGI:107891	Nop2	0.699883
MGI:88516	Cryab	2.18929	MGI:99137	Xrcc1	0.749914
MGI:103063	Stat1	1.93082	MGI:1922194	Qtrtd1	0.692677
MGI:1098726	Emp2	2.58372	MGI:2140779	Sdad1	0.686381
MGI:87963	Agt	2.31882	MGI:107184	Cct7	0.745804
MGI:1926263	Gbp3	1.7785	MGI:1915508	Fam111a	0.625189
MGI:1919682	Spink5	2.82767	MGI:1096377	Traip	0.751311
MGI:2135605	Pard6b	1.81965	MGI:1930948	Gar1	0.621924
MGI:1310000	Kcnj15	2.06668	MGI:1333812	Mbd3	0.702132
MGI:1914719	Abhd5	1.72072	MGI:2384310	Rbm10	0.776889
MGI:3528937	Gramd2	1.91005	MGI:1352755	Gtse1	0.733622
MGI:107200	Cbr2	3.7252	MGI:2137204	Mrpl3	0.742779
MGI:107899	Cd36	3.03748	MGI:1916221	Tamm41	0.725736
MGI:88381	F3	2.00137	MGI:108087	Hars	0.720022
MGI:95405	Ephx1	1.89373	MGI:1917851	Ecd	0.731723
MGI:1347055	Vnn3	2.7454	MGI:98886	U2af2	0.695943
MGI:106686	Pon3	2.31555	MGI:1935127	Smarca1	0.739817
MGI:3606242	Nostrin	1.90567	MGI:2135283	Igsf9	0.72934
MGI:108104	Snrk	1.77003	MGI:99700	Cenpc1	0.73154
MGI:108020	Ear2	2.19086	MGI:107246	Tinf2	0.73424
MGI:1928392	Dpt	3.05673	MGI:1277143	Gtf2h3	0.732845
MGI:98178	Trim30a	1.79916	MGI:1859607	Praf2	0.710087
MGI:107588	Gjb6	1.68923	MGI:1921487	Tubgcp2	0.728272
MGI:1922394	Pdzd2	1.85794	MGI:1914353	Ptgr1	0.687412
MGI:3617848	Sec14l3	3.08379	MGI:3642955	Gm5643	0.64842
MGI:2387181	Zbtb8b	1.81612	MGI:1914403	Rnaseh2b	0.712283
MGI:107587	Irf9	1.77794	MGI:1931744	Uck2	0.739356
MGI:108058	Adm	2.00495	MGI:96432	Igf1	0.706075
MGI:1926217	Rnase4	2.12487	MGI:109257	Smn1	0.735059
MGI:104688	Col4a3	1.73509	MGI:2685630	Fndc3c1	0.641955
MGI:105120	Dusp1	1.88394	MGI:87978	Ak2	0.703777
MGI:96211	Hp	3.37393	MGI:109166	Ncs1	0.645956
MGI:109518	Sftpa1	3.42787	MGI:1888939	2016-09-06	0.750922
MGI:2146009	Dennd3	1.85351	MGI:1336214	Khsrp	0.74304
MGI:88233	C6	1.76136	MGI:87909	Acta2	0.744629
MGI:1342284	Slc34a2	3.85084	MGI:1928760	Ruvbl1	0.718536
MGI:103222	Zbtb16	2.30214	MGI:103202	Adsl	0.720064
MGI:1915138	Tmem100	2.05357	MGI:2149728	Impa2	0.753151
MGI:1917912	Clic5	2.74423	MGI:1919414	Rbmx2	0.759818
MGI:1354735	Atp11a	1.96191	MGI:1917200	Rcbtb2	0.727129
MGI:1339941	Cxcl15	3.94788	MGI:106190	Bcl11a	0.705658
MGI:1925225	Tmem50b	2.09302	MGI:1914679	Nudcd1	0.739707
MGI:96031	Hc	5.41639	MGI:1923731	Eif4a3	0.738958
MGI:1276112	Cldn5	2.00618	MGI:1351502	Nup50	0.729165
MGI:1344364	Usp18	2.01417	MGI:1913954	Rbm4b	0.753916
MGI:97373	Npr3	2.07532	MGI:3779453	Prps1l3	0.666963
MGI:2684416	Arap2	2.00467	MGI:1917370	Yars2	0.726392
MGI:1926944	Calcrl	2.44401	MGI:1913878	Thg1l	0.755209
MGI:1916289	Insig1	1.86001	MGI:2145443	Utp15	0.682694
MGI:1344390	Oasl2	2.10718	MGI:2387603	Ahsa1	0.745761
MGI:3606159	Tmem243	2.34605	MGI:1914286	Mrpl45	0.749365
MGI:1338017	Bex2	2.02811	MGI:3646700	Amt	0.704488
MGI:104665	Soat1	1.81083	MGI:2144738	4930427A07Rik	0.748765
MGI:2444966	Tecrl	2.19885	MGI:1913284	Psmd14	0.717142
MGI:1932052	Chia1	3.29497	MGI:1933825	Jam3	0.750896
MGI:88574	Cybb	2.30864	MGI:1918580	Rcbtb1	0.719158
MGI:104695	Scnn1g	2.37247	MGI:1916487	Gtpbp4	0.71667
MGI:2443220	Slc4a5	2.26194	MGI:1917600	Basp1	0.723666
MGI:2388029	Liph	2.34433	MGI:1341112	Parp2	0.725211
MGI:96882	Ly6c1	4.02727	MGI:1341200	Pwp2	0.74558
MGI:1889549	Txnip	2.22258	MGI:1343095	Emc8	0.753929
MGI:1920904	Ccrl2	2.07646	MGI:1914709	Nvl	0.725452
MGI:103297	Atp7b	1.84681	MGI:1096573	Cirh1a	0.705921
MGI:106039	Dtna	1.76378	MGI:1353606	Siva1	0.744813
MGI:1201378	Anxa3	2.36452	MGI:102726	Dck	0.671396
MGI:1321390	Enpp2	2.2525	MGI:1891457	Polh	0.716668
MGI:98973	Xdh	2.53021	MGI:1922847	Ndufaf2	0.726966
MGI:1861441	Rab27a	2.21255	MGI:1921445	Elp3	0.735996
MGI:1329004	Slfn5	2.21436	MGI:2444491	Heatr3	0.728981
MGI:2157910	Mlc1	2.44055	MGI:2384312	Usp11	0.761659
MGI:103178	Vegfa	2.10021	MGI:2445054	Senp1	0.715222
MGI:1891351	Spock2	2.71783	MGI:1344413	Tex10	0.731806
MGI:1330819	Osmr	1.94724	MGI:95595	Fv1	0.717414
MGI:1306826	Sema7a	1.97441	MGI:1926083	Gins3	0.687141
MGI:2145458	Akr1c14	3.67225	MGI:1917418	Gprasp1	0.713717
MGI:1202394	Gif	1.9557	MGI:1860494	Ddx21	0.666524
MGI:1096574	Car4	3.00766	MGI:2443205	Rbm15	0.728526
MGI:1913391	Ifitm3	2.1529	MGI:95453	Smarcad1	0.726657
MGI:109496	Lgals9	2.03315	MGI:1860489	Ptbp2	0.691243
MGI:1913975	Lrrk2	2.10189	MGI:2443607	Rpp38	0.74348
MGI:2182928	Gpr116	2.18496	MGI:1924223	Fbxo21	0.742791
MGI:101782	Scnn1a	2.92681	MGI:101785	Mybl2	0.706387
MGI:1923727	Pcolce2	2.31255	MGI:2386251	Eif3l	0.761303
MGI:87938	Adrb2	2.28136	MGI:1930009	Ppp2r3c	0.768733
MGI:1924378	Crebrf	2.05589	MGI:105992	Tkt	0.752485
MGI:96441	Igfbp6	3.17311	MGI:894653	Npm3	0.689511
MGI:103225	Cyp4b1	2.28401	MGI:1919650	Pinx1	0.725237
MGI:2137698	Ugt1a6a	2.56558	MGI:3801919	Gm16111	0.377989
MGI:1919489	Parp14	2.03338	MGI:87881	Acp1	0.759312
MGI:1346021	Slco2a1	2.46208
MGI:1096355	S1pr1	2.08965
MGI:2385067	Lims2	2.08897
MGI:1891430	Slc36a2	2.05952
MGI:1888992	Msln	3.54138
MGI:1914797	Slc39a8	2.12426
MGI:1098776	Lbp	2.30898
MGI:2444151	Clec1a	2.43004
MGI:1918954	Arhgef3	2.19208
MGI:2158417	Rtkn2	2.91622
MGI:2444421	Gbp7	2.24089
MGI:1915025	Rtp4	2.36626
MGI:99554	Lgals3bp	2.63019
MGI:2442259	Gsap	2.16618
MGI:87874	Ace	3.07229
MGI:1917997	Tspan2	2.93764
MGI:2443016	Ifi44	2.61336
MGI:1891697	Ackr2	2.53383
MGI:1915963	Ifitm1	2.85698
MGI:103201	Aqp1	3.0282
MGI:98919	Scgb1a1	8.61663
MGI:1918882	Scn3b	2.75249
MGI:108395	Vnn1	3.77115
MGI:106215	Aqp5	2.9444
MGI:96897	Lyz2	4.12951
MGI:1918974	Aox3	2.53285
MGI:96757	Lcn2	4.6514
MGI:1920932	Acer2	3.12629
MGI:88476	Cp	4.33602
MGI:88235	C7	2.60086
MGI:109515	Sftpd	4.16748
MGI:3711310	9930111J21Rik2	2.39688
MGI:102963	Inmt	8.53769
MGI:2142763	Cyp4v3	2.44021
MGI:103295	Pon1	3.43257
MGI:1918834	Gdpd2	3.65706
MGI:96902	Lyz1	10.5226
MGI:88227	C3	7.1571
MGI:98239	Scd1	8.65724
MGI:1340899	Chil1	13.0529

## Sheet: SACvsALV1
UPREGULATED			DOWNREGULATED
MGI_ID	Symbol	FoldChange	MGI_ID	Symbol	FoldChange
MGI:98263	Ccl6	2.11795	MGI:106671	Cdh16	0.423709
MGI:88588	Cyp1a1	2.10219	MGI:2177268	Ppp1r3b	0.358497
MGI:1915138	Tmem100	2.09918	MGI:1921160	Arhgap18	0.520193
MGI:108085	Hpgd	2.07201	MGI:1916042	Srpx2	0.506744
MGI:96448	Ighm	2.06108	MGI:1858203	Rab25	0.499795
MGI:96495	Igkc	2.04021	MGI:1917271	Nt5dc2	0.489555
MGI:102482	mt-Tl1	2.03516	MGI:3045722	Tmem255a	0.445518
MGI:105120	Dusp1	2.03205	MGI:98852	Tst	0.558817
MGI:1924415	Atp6v0d2	2.02841	MGI:1926287	Plac1	0.541169
MGI:102483	mt-Tk	2.00907	MGI:95285	Edn3	0.506038
MGI:88613	Cyr61	2.00843	MGI:3603344	Ankrd37	0.349393
MGI:107527	Ly6a	2.00075	MGI:98797	Tpi1	0.534248
MGI:101922	Tnc	2.0001	MGI:1315192	Lrrc23	0.479042
MGI:109169	Epas1	1.99956	MGI:104716	Nnat	0.453593
MGI:98739	Thbs3	1.98854	MGI:88090	Ass1	0.260322
MGI:96882	Ly6c1	1.97851	MGI:2387181	Zbtb8b	0.535521
MGI:107557	Sema3c	1.97529	MGI:1346325	Gadd45g	0.43887
MGI:96031	Hc	1.97061	MGI:1333871	Hsd17b10	0.632764
MGI:1340062	Sgk1	1.96208	MGI:1347076	Rpl27a	0.56108
MGI:98941	Vwf	1.96128	MGI:1918983	Susd2	0.524332
MGI:96757	Lcn2	1.95689	MGI:1925384	Lpar4	0.59781
MGI:1861431	Clec7a	1.95679	MGI:101849	Gnb2l1	0.631268
MGI:98919	Scgb1a1	1.94964	MGI:1341272	Col14a1	0.561018
MGI:1914145	Pxdc1	1.94374	MGI:95393	Eno1	0.610175
MGI:96611	Itgb2	1.94186	MGI:891978	Phyh	0.572274
MGI:95488	Fbln2	1.92627	MGI:1935127	Smarca1	0.645595
MGI:1934659	Pi15	1.92572	MGI:1932288	Egln3	0.364074
MGI:1932052	Chia1	1.91815	MGI:1261768	Stbd1	0.70678
MGI:103060	Ecm1	1.9155	MGI:98038	Rpl32	0.677054
MGI:109515	Sftpd	1.90395	MGI:104564	Cdkn1c	0.655607
MGI:102889	Vcan	1.9035	MGI:1859778	Hif3a	0.378324
MGI:1096574	Car4	1.9015	MGI:98117	Rps15	0.64878
MGI:1890373	Tmem2	1.89381	MGI:96759	Ldha	0.673327
MGI:98737	Thbs1	1.89077	MGI:2137410	Peo1	0.700736
MGI:1923724	Spon2	1.8887	MGI:1914135	Acadsb	0.683935
MGI:2158417	Rtkn2	1.87638	MGI:3648396	Gm6472	0.545044
MGI:95537	Ctgf	1.87442	MGI:88208	Bsg	0.713167
MGI:2667763	Retnlg	1.87141	MGI:98371	Sox9	0.693182
MGI:4439838	Trac	1.87085	MGI:2136460	Echs1	0.65289
MGI:1333743	Mpeg1	1.85684	MGI:103232	Grb10	0.672837
MGI:1859274	Pdlim3	1.84977	MGI:1914858	Narf	0.638788
MGI:104589	Actg2	1.83645	MGI:97829	Pygl	0.520185
MGI:107341	Ctss	1.83589	MGI:99612	Epha3	0.616414
MGI:1316689	Igkj1	1.81989	MGI:97565	Pgm2	0.620963
MGI:97810	Ptprc	1.81947	MGI:2146559	AU021092	0.536198
MGI:98488	Slc6a6	1.81597	MGI:1913101	Cldn10	0.520571
MGI:88342	Cd68	1.80722	MGI:97547	Pfkl	0.576017
MGI:1353450	Aldh1a1	1.80648	MGI:3651545	Rpsa-ps4	0.424872
MGI:88608	Cyp2f2	1.80493	MGI:1921395	F13a1	0.543696
MGI:1354387	Mfap5	1.80489	MGI:3704228	Rpsa-ps10	0.587686
MGI:2686976	Ifitm6	1.79687	MGI:1921080	Eif3k	0.620042
MGI:1915105	Asprv1	1.78565	MGI:1097682	Rps5	0.620617
MGI:1891351	Spock2	1.78309	MGI:3651313	Gm11824	0.410559
MGI:1888999	Angptl4	1.78306	MGI:1915141	Rpl4	0.745049
MGI:1923759	Plet1	1.77854	MGI:1891716	Emcn	0.621945
MGI:1932682	Cxcl16	1.77646	MGI:1333864	Mrpl14	0.559024
MGI:2685047	Hmcn1	1.77309	MGI:1316737	G0s2	0.517334
MGI:88338	Cd44	1.76615	MGI:1915851	Qars	0.749697
MGI:97255	Myh6	1.76303	MGI:2148705	Foxp2	0.6319
MGI:102488	mt-Te	1.7524	MGI:1921435	Gbe1	0.604704
MGI:105983	Ngp	1.74578	MGI:101863	Aldoc	0.573937
MGI:3589109	Sgpp2	1.74462	MGI:2385066	Rprd1a	0.718636
MGI:108412	Ppap2a	1.74279	MGI:107434	Cdh8	0.719438
MGI:104979	Cnn1	1.73421	MGI:3779742	Gm7418	0.584475
MGI:1923017	Rab11fip1	1.72666	MGI:103288	Polr1c	0.669335
MGI:2385017	Nrbp2	1.7211	MGI:3649805	Rpl13-ps1	0.639606
MGI:2182928	Gpr116	1.7186	MGI:2177191	Bspry	0.639031
MGI:1336883	Smad6	1.71559	MGI:1858229	Ppp1r3c	0.514641
MGI:96534	Cd74	1.71163	MGI:1929520	Eef1b2	0.719123
MGI:104695	Scnn1g	1.70356	MGI:2183441	Psat1	0.596239
MGI:893588	Cirbp	1.70183	MGI:3645367	Gm6274	0.609196
MGI:103225	Cyp4b1	1.70052	MGI:1924855	H2afv	0.549695
MGI:1098296	Cpt1a	1.69938	MGI:2443026	Ccdc67	0.682857
MGI:96942	Tpsb2	1.69661	MGI:1916296	Isca1	0.50522
MGI:104696	Scnn1b	1.69341	MGI:1915050	Dgat2	0.555673
MGI:109440	Ly6g	1.69268	MGI:98073	Rpl7	0.371941
MGI:96837	Ltf	1.69223	MGI:1202304	Gnmt	0.512908
MGI:98241	Stmn2	1.68368	MGI:96136	Hmgn2	0.295093
MGI:1918686	Flrt3	1.68364	MGI:1341847	Hhip	0.649988
MGI:107685	Plxna1	1.68355	MGI:1915466	Wdr86	0.779093
MGI:1934765	Gpnmb	1.68102	MGI:1337006	Hapln1	0.49298
MGI:1915221	Tppp3	1.68096	MGI:1924772	Tmem213	0.501093
MGI:95895	H2-Aa	1.67993	MGI:1351455	Rpl13a	0.649432
MGI:2685813	Fam189a2	1.67962	MGI:3646633	Gm7290	0.632664
MGI:1918988	Mamdc2	1.67524	MGI:2135589	Clec2d	0.649337
MGI:88598	Cyp2b10	1.67056	MGI:1353638	Rps12-ps1	0.566603
MGI:1860764	Pde3a	1.67022	MGI:108037	Figf	0.657878
MGI:96609	Itgax	1.66449	MGI:3704322	Rps26-ps1	0.669337
MGI:1915905	Fndc1	1.66402	MGI:2444465	Frem2	0.648751
MGI:1298407	Tspan7	1.66019	MGI:3650537	Gm14165	0.733616
MGI:98260	Ccl3	1.6599	MGI:88496	Crh	0.637095
MGI:108046	Laptm5	1.6585	MGI:98107	Rps14	0.564248
MGI:106196	Stfa3	1.65685	MGI:95304	Eif4b	0.730916
MGI:88321	Ms4a1	1.65572	MGI:1333780	Rps19	0.392234
MGI:103070	H2-Ab1	1.65538	MGI:1915385	Eif3h	0.650041
MGI:106096	Loxl1	1.64527	MGI:3644742	Gm7618	0.551676
MGI:104574	Ptprj	1.6449	MGI:1913731	Rps21	0.637563
MGI:1316692	Igkj4	1.64289	MGI:98158	Rps4x	0.189675
MGI:3041242	Sema3g	1.64272	MGI:98146	Rps18	0.275648
MGI:2684326	Slc39a2	1.64253	MGI:1913335	Eif3f	0.68442
MGI:1913945	Aspn	1.64149	MGI:3648534	Gm8973	0.685402
MGI:3031176	Olfr1342	1.63938	MGI:2384312	Usp11	0.742172
MGI:1342772	Klf2	1.63413	MGI:3645893	Gm6166	0.488382
MGI:3645124	Gm5483	1.63344	MGI:108186	Aldh7a1	0.692899
MGI:97809	Ptprb	1.63152	MGI:2682318	Zfp395	0.788087
MGI:108021	Ear1	1.62812	MGI:1350917	Rps3	0.703671
MGI:1352480	Igfbp7	1.62782	MGI:3642341	Gm15427	0.708713
MGI:1859682	Slc23a2	1.62595	MGI:2385115	Lyplal1	0.680023
MGI:1095407	Bmpr2	1.61934	MGI:1349477	Tinag	0.571985
MGI:96612	Itgb3	1.61513	MGI:1859866	Cdc20	0.628087
MGI:95392	Eng	1.6147	MGI:2444298	G2e3	0.736806
MGI:1921372	Tmem43	1.61196	MGI:2670995	Trp53i11	0.590907
MGI:1347095	Cd97	1.60925	MGI:2677454	Cetn4	0.655462
MGI:1914109	Slc16a9	1.605	MGI:3649910	Gm11619	0.557282
MGI:1346021	Slco2a1	1.60471	MGI:105922	Rpl13	0.263124
MGI:1861606	Tacstd2	1.60143	MGI:1929129	Sap30	0.741925
MGI:106215	Aqp5	1.60085	MGI:1342291	Rlim	0.762106
MGI:1861231	Clec4n	1.6001	MGI:1931139	Ppp1r14a	0.704577
MGI:1347245	Ceacam1	1.59978	MGI:1351329	Rps11	0.700806
MGI:1914797	Slc39a8	1.59734	MGI:2387863	Zmynd10	0.71995
MGI:108563	Sirpa	1.59666	MGI:3646897	Gm6136	0.70226
MGI:104688	Col4a3	1.5933	MGI:1859284	Cldn6	0.604974
MGI:1860485	Plek	1.59085	MGI:98887	Uba52	0.238573
MGI:1924375	Il33	1.58413	MGI:1929455	Rpl23	0.702783
MGI:97370	Enpp1	1.5824	MGI:1914347	Rps10	0.500959
MGI:1920932	Acer2	1.58146	MGI:96414	Idh2	0.742082
MGI:2443731	Mat2a	1.58127	MGI:3650107	Gm14279	0.594049
MGI:101784	Nes	1.5801	MGI:5434256	Gm20900	0.64592
MGI:88479	Cpa3	1.57994	MGI:2442111	Ppm1k	0.668433
MGI:1927899	Mmp19	1.57729	MGI:1928849	Svep1	0.64474
MGI:1919539	Malat1	1.57711	MGI:3651796	Rps11-ps2	0.769589
MGI:1914361	Naaa	1.56968	MGI:1916023	Zc3hc1	0.767068
MGI:94885	Des	1.56771	MGI:1341799	Ndrg1	0.463557
MGI:1913425	Mustn1	1.56712	MGI:1917433	Dzip3	0.713824
MGI:105303	Cxcr2	1.56327	MGI:1926185	Saal1	0.743381
MGI:87905	Actc1	1.56239	MGI:1913557	Isoc1	0.705232
MGI:1914148	Baiap2l1	1.5606	MGI:1346500	Igbp1	0.740808
MGI:2183535	Cytip	1.55902	MGI:3647789	Gm5428	0.690703
MGI:1858959	Elovl1	1.55785	MGI:2149632	Rpl31	0.603816
MGI:2443310	Olfml2b	1.55547	MGI:95755	Slc2a1	0.538849
MGI:98664	Tek	1.55418	MGI:108414	Pafah1b3	0.792591
MGI:102472	mt-Tv	1.5535	MGI:1201789	Rpl36a	0.600219
MGI:2142908	Myzap	1.55066	MGI:1923507	Slc38a3	0.509101
MGI:2152187	Cyyr1	1.55061	MGI:1914291	Oxct1	0.673146
MGI:1925668	Pgm5	1.55024	MGI:3650324	Gm12254	0.742322
MGI:1923658	Abcc3	1.54781	MGI:1858225	Tuba8	0.673584
MGI:88341	Cd53	1.54409	MGI:3045346	9230110C19Rik	0.731453
MGI:1341803	Lipg	1.54141	MGI:101805	Gys1	0.681397
MGI:1926217	Rnase4	1.54074	MGI:1927636	Rplp0	0.813017
MGI:106198	Stfa1	1.53725	MGI:95891	H19	0.579425
MGI:109192	Actn2	1.53354	MGI:3782787	Gm4604	0.684615
MGI:1194503	Atp2a3	1.53331	MGI:3649794	Gm11353	0.579516
MGI:1891228	Scel	1.53083	MGI:96968	Mest	0.619148
MGI:95321	Emb	1.52778	MGI:3642381	Gm10269	0.500657
MGI:1920198	Tppp	1.52697	MGI:1913883	Nsa2	0.736368
MGI:95662	Gata2	1.52441	MGI:1351614	Gyg	0.712379
MGI:96794	Lmna	1.52401	MGI:1914175	Sdhd	0.741766
MGI:95760	Slc6a9	1.5236	MGI:87929	Adh5	0.732039
MGI:2137913	Loxl2	1.52237	MGI:1860263	Psmg1	0.763901
MGI:1310002	Fmo1	1.52203	MGI:1915367	Apool	0.736079
MGI:1346318	Klf6	1.52146	MGI:3648994	Gm6404	0.548214
MGI:1202395	Mmp8	1.52098	MGI:1914531	Rpl37	0.645476
MGI:2442416	Itpripl2	1.52067	MGI:1889842	Fam13a	0.679715
MGI:3512453	A4galt	1.52039	MGI:1289192	Fbxo36	0.694643
MGI:1341110	Adcy8	1.52005	MGI:1914677	Rps20	0.711617
MGI:1921377	Krt80	1.51978	MGI:106015	Cox7a2l	0.599598
MGI:103266	Fgl2	1.51893	MGI:2444966	Tecrl	0.560893
MGI:2655562	Eltd1	1.51762	MGI:98068	Rpl37a	0.417995
MGI:1923703	Prss23	1.51566	MGI:88473	Cox4i1	0.687262
MGI:96607	Itgam	1.51521	MGI:1315195	Emg1	0.743229
MGI:2442259	Gsap	1.51512	MGI:1261838	Nit2	0.75635
MGI:88227	C3	1.5125	MGI:2448314	Hist2h2ab	0.598922
MGI:1860611	Pdlim1	1.51164	MGI:1916189	Rasl11b	0.660196
MGI:4439658	Ighj4	1.50718	MGI:1196415	Tada1	0.80996
MGI:102476	mt-Tr	1.50536	MGI:1333820	Mrpl30	0.756583
MGI:99502	Ltbp2	1.50291	MGI:95861	Gstm2	0.732045
MGI:1891123	Kcne2	1.50097	MGI:3647512	Gm4945	0.709853
MGI:95476	Fabp3	1.50064	MGI:2144224	Wdr92	0.747931
MGI:3051647	Pappa2	1.50048	MGI:1915077	Aldh6a1	0.643454
MGI:1261434	Olr1	1.50005	MGI:1928009	Vsig2	0.730356
MGI:107823	Ctsk	1.49705	MGI:1914410	Eef1g	0.739545
MGI:96648	Jund	1.49691	MGI:108110	Sparcl1	0.70525
MGI:105097	Efnb2	1.49631	MGI:107185	Cct5	0.772165
MGI:106012	Tagln	1.49572	MGI:3652091	Gm14438	0.506374
MGI:2145953	Kdelr3	1.49472	MGI:3651722	Gm12174	0.55231
MGI:97798	Ptgs2	1.49435	MGI:3648731	Gm6134	0.613344
MGI:98389	Spp1	1.4943	MGI:1918335	Arhgap19	0.700191
MGI:97610	Plat	1.49232	MGI:98345	Snrpd2	0.679062
MGI:1935151	Klf7	1.49218	MGI:3644020	Rpl7a-ps11	0.522447
MGI:1278319	Fpr2	1.4919	MGI:2445062	Mum1l1	0.637166
MGI:95496	Fcer1g	1.49172	MGI:1917786	Qpct	0.612025
MGI:95904	H2-K1	1.48982	MGI:3647234	Rps15-ps2	0.723686
MGI:1923239	Treml4	1.48855	MGI:96435	Igf2r	0.726214
MGI:107814	Tubb1	1.48749	MGI:1926119	Pdk1	0.662593
MGI:97612	Plaur	1.48461	MGI:104689	Cct4	0.716843
MGI:96606	Itgal	1.48263	MGI:1933754	Nedd4l	0.589312
MGI:1351327	Pla2g7	1.48164	MGI:1860763	Eif3i	0.680039
MGI:104533	Ccl9	1.47959	MGI:109278	Ogn	0.641504
MGI:2442746	Slc43a2	1.47936	MGI:2685720	Acss3	0.605959
MGI:96897	Lyz2	1.47927	MGI:96441	Igfbp6	0.507595
MGI:96955	Slc3a2	1.47842	MGI:88351	Cdk1	0.56344
MGI:1860292	Ramp3	1.47613	MGI:3644217	Rpl3-ps1	0.641795
MGI:96940	Mcpt4	1.47408	MGI:4360871	Gm16519	0.700418
MGI:88314	Ccnd2	1.46965	MGI:2442829	Klhl4	0.70985
MGI:88320	Cd2	1.46823	MGI:1924769	Zfp266	0.749885
MGI:97008	Mmp11	1.46748	MGI:94900	Dlk1	0.416062
MGI:88182	Bmp6	1.4663	MGI:3647073	Rps19-ps2	0.635169
MGI:1929691	Slc15a3	1.46502	MGI:2448377	Hist1h2bb	0.611611
MGI:2445082	Pamr1	1.46433	MGI:103562	Hsd11b1	0.584098
MGI:104692	Pcdh1	1.46423	MGI:894678	Aurka	0.641297
MGI:3603204	Piezo1	1.46365	MGI:2448388	Hist1h2bj	0.513065
MGI:2444628	Sh3rf2	1.46335	MGI:1924217	2700049A03Rik	0.771946
MGI:2142195	Leng8	1.46266	MGI:96434	Igf2	0.588945
MGI:1355312	C1s	1.46261	MGI:1923488	Grhpr	0.696506
MGI:1100870	Gcnt2	1.46179	MGI:3039567	Ndufa4l2	0.628293
MGI:107561	Sema3b	1.46133	MGI:102688	H2afx	0.591252
MGI:1916943	Pof1b	1.46057	MGI:3643807	Gm5619	0.609562
MGI:103556	Cxcl12	1.4604	MGI:1922939	Higd1b	0.748928
MGI:98304	St3gal1	1.46036	MGI:3643597	Gm8213	0.688815
MGI:1347002	Angptl2	1.4571	MGI:98147	Rps24	0.628592
MGI:1346091	Fbln5	1.45694	MGI:3651518	Gm13827	0.705068
MGI:1927070	Dusp10	1.45666	MGI:3652285	Gm13680	0.46838
MGI:2442595	Slc36a4	1.45645	MGI:1925141	Ube2s	0.713
MGI:1915913	Slc25a25	1.45605	MGI:1349919	Ndufb11	0.704916
MGI:88467	Col1a1	1.4554	MGI:88375	Cenpa	0.625248
MGI:1924696	Heg1	1.45437	MGI:1922867	Rps25	0.707085
MGI:2685142	Olfm4	1.45363	MGI:1914436	Rplp2	0.751417
MGI:102702	Gp49a	1.45204	MGI:3651491	Gm13864	0.554272
MGI:2384974	Mfsd7c	1.45181	MGI:2684977	Cym	0.554161
MGI:3819952	Igkv1-135	1.45119	MGI:1913419	Tomm7	0.622823
MGI:104678	Tm4sf1	1.45097	MGI:2448295	Hist1h2ah	0.558937
MGI:98753	Timp2	1.45084	MGI:3646595	Rpl31-ps11	0.698879
MGI:1339755	Csf3r	1.45069	MGI:1350927	Rpl8	0.744438
MGI:96392	Icam1	1.45028	MGI:3643356	Rpsa-ps2	0.711853
MGI:1888712	Ppbp	1.44757	MGI:1351605	Rpl3	0.689284
MGI:99554	Lgals3bp	1.44718	MGI:1914869	Nob1	0.788114
MGI:1354952	Dkk3	1.44687	MGI:106379	Rtcb	0.807371
MGI:1921730	Samd4	1.44537	MGI:1343124	Hpse	0.803697
MGI:2444691	Tfcp2l1	1.44526	MGI:1920537	1700040L02Rik	0.738903
MGI:1316717	Ifrd1	1.44358	MGI:3780033	Gm9625	0.657346
MGI:88562	Ctsd	1.44332	MGI:98003	Rpl18	0.649237
MGI:2443538	Msrb3	1.4433	MGI:95893	H1f0	0.734641
MGI:95678	Gda	1.44265	MGI:97281	Ncam1	0.784054
MGI:3710533	Gpr137b-ps	1.44226	MGI:3644830	Gm8864	0.791433
MGI:97756	Srgn	1.44168	MGI:88061	Aprt	0.728993
MGI:1298389	Clec4d	1.44129	MGI:1924082	Hyls1	0.779318
MGI:104719	Ndst1	1.43981	MGI:1913625	Dhrs7	0.743634
MGI:1914510	Cers4	1.43899	MGI:3646660	Gm5384	0.703335
MGI:95716	Gja5	1.43775	MGI:99441	Ckmt1	0.665248
MGI:1920048	Lhfp	1.43761	MGI:1916260	Anapc13	0.662864
MGI:99571	Glp1r	1.43674	MGI:1916119	Imp3	0.682608
MGI:1926944	Calcrl	1.43662	MGI:3646997	Rpl18-ps2	0.621067
MGI:99547	Iglc2	1.4348	MGI:3643614	Rps27a-ps2	0.458435
MGI:88574	Cybb	1.43431	MGI:98847	Kdm3a	0.696408
MGI:2443191	Nceh1	1.4332	MGI:1855697	Atp5e	0.666539
MGI:107200	Cbr2	1.43217	MGI:1913447	Cks2	0.660303
MGI:98279	Sell	1.43196	MGI:3646824	Rpl19-ps4	0.737285
MGI:2442900	Tmcc3	1.43191	MGI:3643105	Gm7079	0.597642
MGI:107704	Abcg1	1.43184	MGI:1917507	2010107E04Rik	0.627982
MGI:96433	Igf1r	1.43149	MGI:2448309	Hist1h2af	0.563955
MGI:95933	H2-Q4	1.42911	MGI:1918730	8430408G22Rik	0.499297
MGI:108020	Ear2	1.42717	MGI:99262	Rpl22	0.765365
MGI:109516	Sftpb	1.42619	MGI:1101781	Elf3	0.729386
MGI:1101357	Ece1	1.42554	MGI:1915195	Rpl41	0.80469
MGI:2449205	Nr1d2	1.42516	MGI:2448404	Hist1h2bm	0.563697
MGI:103201	Aqp1	1.42449	MGI:3651359	Gm12508	0.59697
MGI:1309465	Slc12a4	1.42437	MGI:1916198	Fam216a	0.763892
MGI:102470	mt-Ty	1.42341	MGI:1913382	1110008L16Rik	0.801453
MGI:2442474	Dgkb	1.42226	MGI:99257	Eif3e	0.652305
MGI:1927468	Samhd1	1.42165	MGI:97051	Mdh1	0.776431
MGI:103286	Atp6v0a1	1.42024	MGI:2140113	Hist2h4	0.691587
MGI:2443098	Slc17a2	1.41952	MGI:1916320	Adamts9	0.745992
MGI:102491	mt-Ta	1.41879	MGI:3645531	Gm8112	0.621468
MGI:88232	C5ar1	1.41818	MGI:1914273	Use1	0.679631
MGI:87874	Ace	1.41789	MGI:1194910	Rbbp7	0.761135
MGI:2442058	Nipa1	1.41767	MGI:1201678	Cacna1g	0.721382
MGI:1340034	Sema3e	1.41725	MGI:1914523	Ndufa10	0.801129
MGI:99440	Cd33	1.41708	MGI:1919907	2700094K13Rik	0.688044
MGI:2444815	Samd5	1.41708	MGI:3805541	Gm15772	0.353547
MGI:1314883	Tnfrsf1b	1.41669	MGI:1915278	Rpl22l1	0.474697
MGI:96079	Hgf	1.41169	MGI:3643941	Gm9167	0.746827
MGI:1277150	Ldlrad4	1.4112	MGI:1919090	Tekt4	0.72379
MGI:1925144	Prickle2	1.41107	MGI:97591	Pkm	0.762478
MGI:96832	Lsp1	1.41001	MGI:1920974	Mcee	0.760593
MGI:95901	H2-Eb1	1.40971	MGI:1920795	1700094D03Rik	0.674587
MGI:109151	Ltbp1	1.40949	MGI:107477	Stil	0.7037
MGI:2146320	Dock10	1.40917	MGI:1289298	Knstrn	0.622143
MGI:97813	Ptpre	1.40872	MGI:1309515	Gsta4	0.648061
MGI:2449569	Adamts15	1.40693	MGI:1098566	Gypc	0.788245
MGI:98736	Thbd	1.40586	MGI:1919942	Hnrnpll	0.783341
MGI:1929600	Pmepa1	1.40386	MGI:1913906	Eef1d	0.771173
MGI:109320	Mmp15	1.40328	MGI:1321390	Enpp2	0.619294
MGI:109518	Sftpa1	1.40222	MGI:1919127	Efhc1	0.704458
MGI:98287	Srsf5	1.40191	MGI:109359	Nek2	0.696303
MGI:98931	Ezr	1.40188	MGI:105943	Rpl10	0.775936
MGI:1919599	Dusp3	1.39998	MGI:3704345	Rps27rt	0.339685
MGI:106662	Ly75	1.39931	MGI:2448297	Hist1h2ak	0.645729
MGI:1918195	Mmrn1	1.39817	MGI:1860206	Ammecr1	0.807679
MGI:103178	Vegfa	1.39809	MGI:1921054	Kif2c	0.595046
MGI:107711	Myo1f	1.39781	MGI:2441982	Aldh5a1	0.829634
MGI:104850	Cd55	1.39607	MGI:1914165	Myeov2	0.710651
MGI:95794	Lrp2	1.39574	MGI:2448326	Hist1h3e	0.536297
MGI:1917824	Cpm	1.39409	MGI:97937	Rmrp	0.746218
MGI:1921384	Cyp2s1	1.39394	MGI:3643526	Gm9034	0.787055
MGI:109297	Slpi	1.39318	MGI:96027	Hbb-y	0.653871
MGI:2179061	Plxna4	1.39293	MGI:1922806	1700026D08Rik	0.729773
MGI:108025	Prkar2a	1.39182	MGI:3705781	Rpl39-ps	0.549242
MGI:1927152	Syne1	1.39073	MGI:1309466	Gstm5	0.691522
MGI:1354756	Crim1	1.3902	MGI:3801880	Gm16139	0.553275
MGI:104687	Col4a4	1.38973	MGI:3642454	Gm10012	0.767535
MGI:99595	Arf2	1.38963	MGI:3708125	Gm15191	0.780919
MGI:2137679	Sfxn3	1.38881	MGI:1855700	Pcdh12	0.760713
MGI:1917977	Rasgef1a	1.38812	MGI:1095409	Tuba1c	0.744464
MGI:2387597	Gabrp	1.38718	MGI:95810	Gria3	0.738917
MGI:96530	Iglv1	1.38654	MGI:1915261	Snrpg	0.630653
MGI:1891463	Gpr137b	1.38631	MGI:1099809	Fgf10	0.719898
MGI:1919410	Tmem163	1.38394	MGI:106184	Npm1	0.728256
MGI:2444824	Sirpb1a	1.38365	MGI:3704275	Gm10420	0.706395
MGI:1347470	Foxf1	1.38321	MGI:1913842	Stoml2	0.7769
MGI:2443793	6430548M08Rik	1.38297	MGI:3651234	Rpsa-ps12	0.625376
MGI:106020	St8sia2	1.38297	MGI:88034	Prdx3	0.768795
MGI:1922394	Pdzd2	1.38264	MGI:1194909	Rsph1	0.736607
MGI:1916125	Tmcc2	1.38209	MGI:3650052	Gm13882	0.751899
MGI:2138162	Stk17b	1.38203	MGI:1915862	Ube2c	0.652438
MGI:96257	Hspg2	1.38033	MGI:1913762	Dera	0.780132
MGI:1926139	Wsb1	1.3798	MGI:1919448	Skiv2l2	0.800685
MGI:2143267	Plscr4	1.37963	MGI:1927244	Ralb	0.758033
MGI:2146009	Dennd3	1.37923	MGI:2444667	Kctd12b	0.788247
MGI:1921298	4632428N05Rik	1.37776	MGI:2685307	H1fx	0.796807
MGI:1930005	Trem1	1.37767	MGI:1339365	S1pr3	0.725972
MGI:107443	Fpr1	1.37749	MGI:1342299	Ruvbl2	0.816935
MGI:1890497	Plvap	1.37702	MGI:102520	Phb2	0.806646
MGI:106626	Dusp8	1.37694	MGI:95490	Fbn2	0.600654
MGI:1339759	Csf2rb	1.37686	MGI:1861461	Hist1h1b	0.535889
MGI:1914698	Plxdc2	1.37642	MGI:1306799	D17H6S56E-5	0.646663
MGI:1922019	Pik3cb	1.37589	MGI:2445221	Cd109	0.768371
MGI:96396	Id1	1.37586	MGI:3645135	Gm5862	0.61987
MGI:1924238	Rdh10	1.3757	MGI:96982	Mif	0.723496
MGI:2146854	Itfg3	1.37548	MGI:108104	Snrk	0.697707
MGI:1918448	Otud1	1.37518	MGI:3649022	Rpl21-ps13	0.746136
MGI:1100518	Smad7	1.37504	MGI:3648460	Gm8292	0.759612
MGI:1336885	Cd84	1.37472	MGI:1298229	Nid2	0.762415
MGI:97178	Map4	1.37441	MGI:1919085	Lancl2	0.821142
MGI:1344401	Rnf144a	1.37387	MGI:99600	Aldh2	0.79464
MGI:87947	Adssl1	1.37362	MGI:1933830	Enpp5	0.805593
MGI:2444067	Pqlc3	1.37284	MGI:3651300	Gm13611	0.739555
MGI:109137	Rasgrf2	1.37219	MGI:5012025	Gm19840	0.675364
MGI:1916523	Mettl7a1	1.37213	MGI:3645883	Rps12-ps16	0.613083
MGI:102485	mt-Th	1.37211	MGI:5504037	Gm26922	0.552495
MGI:1339758	Csf1r	1.36968	MGI:3648194	Rpl31-ps17	0.614823
MGI:1096347	Sema3f	1.36968	MGI:1925505	Ralgps2	0.786661
MGI:1927498	Rgs18	1.36962	MGI:96853	Alad	0.557759
MGI:103007	Epb4.1l4a	1.36956	MGI:2147914	Nxt2	0.787374
MGI:2445179	Tmem184b	1.36903	MGI:1925622	Snrnp25	0.769323
MGI:1349762	Dpysl3	1.36852	MGI:3642902	Rps25-ps1	0.532206
MGI:1351867	Slco3a1	1.36836	MGI:1917436	Fam162a	0.787845
MGI:99852	Runx1	1.36747	MGI:104884	Psmb1	0.737069
MGI:96602	Itga3	1.36577	MGI:1333818	Rps7	0.676055
MGI:1330808	Hsd17b7	1.36562	MGI:88311	Ccnb2	0.584555
MGI:2447362	Slc24a4	1.3645	MGI:3826572	Gm16302	0.613967
MGI:96298	Hyal1	1.36424	MGI:94873	Pcbd1	0.667233
MGI:87937	Adrb1	1.36398	MGI:109486	Prdx2	0.762299
MGI:1098729	Emp3	1.36383	MGI:894292	Mtr	0.803575
MGI:4439781	Ighv1-14	1.36249	MGI:1915260	Bambi	0.763194
MGI:87890	Chrnb1	1.36192	MGI:2448300	Hist1h2an	0.60687
MGI:3698178	Fam174b	1.36187	MGI:1931523	Hist1h1a	0.554384
MGI:1916858	Sec24d	1.36185	MGI:2135874	Cpn1	0.532092
MGI:104631	Utrn	1.36179	MGI:2139667	Dpyd	0.790015
MGI:1354381	Tmprss2	1.36159	MGI:3651326	Gm12260	0.765956
MGI:1309999	Prkx	1.36115	MGI:1924434	Fam64a	0.61569
MGI:1917113	Ttc39b	1.36094	MGI:87870	Acat1	0.74921
MGI:2151110	Prelp	1.35969	MGI:2448387	Hist1h2bh	0.714006
MGI:98310	Ski	1.35959	MGI:95523	Fgfr2	0.792089
MGI:1351484	Tnfrsf12a	1.35954	MGI:5474850	Hbb-bt	0.448255
MGI:99425	Rab11b	1.3591	MGI:1098684	Eif2a	0.829409
MGI:1340051	Gpr56	1.35848	MGI:3650834	Gm11249	0.807091
MGI:104295	Sla	1.35747	MGI:1913844	Uqcr11	0.674434
MGI:2655401	Scgb1c1	1.35739	MGI:1352498	Ndrg2	0.613835
MGI:1918142	Ttll7	1.35736	MGI:1339968	Cth	0.562286
MGI:101774	Cd79a	1.35689	MGI:1918001	6330403K07Rik	0.719078
MGI:2445210	Cyp4f39	1.35685	MGI:1922974	Ccdc18	0.820646
MGI:2674939	Podn	1.35678	MGI:1202722	Gtf2i	0.826283
MGI:1345139	Spry1	1.35631	MGI:1202402	Pde7a	0.716868
MGI:3036259	Fam102b	1.35611	MGI:1918395	Scara5	0.670527
MGI:105367	Il4ra	1.35608	MGI:95684	Gdf10	0.752491
MGI:97475	Pam	1.35596	MGI:3652085	Gm11687	0.699717
MGI:2685410	Tmem212	1.35581	MGI:3645663	Gm5292	0.776626
MGI:2384936	Spns2	1.35568	MGI:98346	Snrpe	0.612703
MGI:2385228	Tmem119	1.35318	MGI:2448443	Hist4h4	0.714638
MGI:1926063	Nckap1l	1.35262	MGI:1914365	Rpl14	0.748237
MGI:1923930	5330417C22Rik	1.35262	MGI:3780384	Gm2214	0.556245
MGI:99951	Mafk	1.35234	MGI:108089	Erh	0.60485
MGI:102891	Adcy7	1.352	MGI:3649614	Gm13445	0.730519
MGI:2673128	AB041803	1.35132	MGI:1337063	Ap4m1	0.826159
MGI:1917332	Lysmd2	1.35108	MGI:1920328	Pmpcb	0.811877
MGI:88233	C6	1.35085	MGI:1351628	Rps26	0.750606
MGI:1920904	Ccrl2	1.34997	MGI:2448407	Hist1h2bn	0.61304
MGI:2385297	Tpcn2	1.34917	MGI:1927558	Atp5j2	0.750292
MGI:105088	Ntn1	1.34859	MGI:1195966	Ctnnd2	0.77637
MGI:1335107	Cyth3	1.34828	MGI:1921357	Cep55	0.654329
MGI:1926021	Mctp1	1.34778	MGI:1203517	Birc5	0.738879
MGI:894657	Serpinb8	1.34724	MGI:5455371	Gm25594	0.769774
MGI:1203727	Sema6a	1.34649	MGI:3649393	Gm14263	0.803987
MGI:97603	Pkd1	1.34641	MGI:104680	Hspe1	0.749364
MGI:98282	Spi1	1.34612	MGI:1916288	Tmem258	0.775968
MGI:95527	Fgr	1.34388	MGI:2448306	Hist1h2ab	0.566064
MGI:1932576	Akap12	1.34314	MGI:2448399	Hist1h2bk	0.439286
MGI:104898	Gpcpd1	1.34313	MGI:1914304	Paics	0.820596
MGI:99674	Adcy4	1.34299	MGI:1889208	Cks1b	0.670234
MGI:2387188	Dirc2	1.34213	MGI:2386251	Eif3l	0.80434
MGI:1919028	Klhl5	1.34153	MGI:97530	Pdgfra	0.647009
MGI:1096355	S1pr1	1.34145	MGI:3649809	Gm14407	0.792775
MGI:1341903	Slc23a1	1.34047	MGI:109233	Kif22	0.666218
MGI:1298205	Slc7a5	1.33969	MGI:95281	Ect2	0.659272
MGI:107505	Alox5ap	1.33923	MGI:95276	Epha7	0.767582
MGI:1930171	Pvrl3	1.3382	MGI:5313075	Gm20628	0.590436
MGI:2443999	Pde8b	1.3373	MGI:1890357	Igf2bp1	0.837053
MGI:3644223	Gm8995	1.33603	MGI:109321	Lama4	0.794062
MGI:1913418	Grina	1.33594	MGI:1298373	Rpl9	0.717588
MGI:102853	Elk4	1.33478	MGI:2385368	Fras1	0.75979
MGI:1355335	Tmod2	1.33445	MGI:104880	Psmb6	0.715983
MGI:3617848	Sec14l3	1.33357	MGI:1277143	Gtf2h3	0.820637
MGI:88554	Ctla2a	1.33353	MGI:106341	Atp5o	0.688291
MGI:107471	Notch4	1.33268	MGI:1929699	Arl3	0.809874
MGI:3819511	Snora75	1.33247	MGI:1196457	Atpif1	0.736892
MGI:99912	Lama2	1.33177	MGI:1921717	Pus10	0.832321
MGI:1345961	Coro1a	1.3317	MGI:107186	Cct2	0.832842
MGI:95757	Slc2a3	1.33159	MGI:1917728	Mipep	0.843492
MGI:2140729	Zfand2a	1.33154	MGI:3642852	Gm10313	0.720263
MGI:2137237	Fam129a	1.33136	MGI:1913192	Fhl5	0.753486
MGI:1860511	Heyl	1.33029	MGI:2448350	Hist1h3i	0.594945
MGI:1277211	Tyrobp	1.33009	MGI:3649931	Gm11361	0.753722
MGI:1321402	Lcp2	1.32944	MGI:1926790	Fzr1	0.831748
MGI:87989	Alas1	1.32928	MGI:3647042	Rps13-ps1	0.602703
MGI:1930150	Popdc2	1.32925	MGI:1917485	Poc1a	0.855496
MGI:95558	Flt1	1.32783	MGI:1913826	Uqcrh	0.580279
MGI:88407	Ckb	1.32776	MGI:3617840	Cpa2	0.701236
MGI:104627	Dst	1.3272	MGI:3704296	Gm15501	0.619382
MGI:1338762	Fhl2	1.32717	MGI:106919	Vdac1	0.830696
MGI:3647196	Lilra5	1.32657	MGI:87994	Aldoa	0.720353
MGI:88110	Atp2a2	1.3253	MGI:106544	D2Wsu81e	0.840785
MGI:2141353	Lrrc8b	1.32522	MGI:3651899	Gm11263	0.708151
MGI:1921396	Dock8	1.32443	MGI:3781727	Gm3550	0.655452
MGI:88318	Cd14	1.32429	MGI:1343103	Ndufa2	0.742275
MGI:98725	Tgfb1	1.32423	MGI:1924096	Rps9	0.576995
MGI:1915776	Gpr155	1.32283	MGI:1918029	Prdm5	0.790292
MGI:1932137	Tnxb	1.32281	MGI:1098231	Kif11	0.606962
MGI:1919210	Myh14	1.3219	MGI:1347352	Hunk	0.795538
MGI:1927489	Pdlim5	1.3202	MGI:2137677	Sfxn1	0.763476
MGI:3779469	Gm5150	1.32006	MGI:1927099	Rplp1	0.820556
MGI:104993	Lepr	1.31971	MGI:3781982	Gm3809	0.7764
MGI:1914701	Pkp2	1.3192	MGI:1333889	Bub1b	0.636639
MGI:1921575	Cltb	1.31859	MGI:1913293	Atp5d	0.77588
MGI:1923206	Srrm2	1.31806	MGI:1201682	Kif20a	0.658083
MGI:1270859	Cry2	1.31781	MGI:109528	Trpc1	0.834342
MGI:2443701	B930095G15Rik	1.31735	MGI:2448423	Hist1h4d	0.681532
MGI:1920371	Fam101a	1.31716	MGI:894689	Ywhae	0.830697
MGI:106664	Cd93	1.31706	MGI:1277989	Shmt2	0.780682
MGI:1914603	Rab31	1.31522	MGI:1915896	Nadk2	0.803621
MGI:2684948	Arhgap30	1.31305	MGI:1913733	Rpl36al	0.737281
MGI:104571	Clcn4-2	1.31263	MGI:1928753	Pfdn5	0.733839
MGI:1197012	Aebp1	1.31162	MGI:2685837	Mettl21e	0.64019
MGI:96285	Slc6a4	1.31087	MGI:1289326	Gpn3	0.789511
MGI:1316648	Ahnak	1.3103	MGI:1855689	Hpcal1	0.761538
MGI:88458	Col5a2	1.30951	MGI:106498	D4Wsu53e	0.717591
MGI:1353635	Lmcd1	1.30941	MGI:1930197	Ncapg	0.642591
MGI:1914114	Clec14a	1.30928	MGI:1315197	Hk2	0.708658
MGI:1316738	Igkj5	1.30844	MGI:106013	Slc16a1	0.729928
MGI:95715	Gja4	1.30809	MGI:1919128	Fam83d	0.769203
MGI:108052	Bcl2l2	1.30804	MGI:3645345	Rpl3-ps2	0.623776
MGI:109354	Ucp2	1.30778	MGI:107460	Cox6b1	0.756499
MGI:1913860	Abi3	1.30769	MGI:3646682	Rpl13-ps3	0.721252
MGI:1924819	Limch1	1.30766	MGI:2137227	Mrpl34	0.799744
MGI:2442359	Cd300lf	1.30753	MGI:97803	Ptma	0.498901
MGI:95557	Flnc	1.30672	MGI:1930943	Rrad	0.775012
MGI:106651	Ly6e	1.30634	MGI:3041226	Akip1	0.815324
MGI:1858171	Tlr5	1.30594	MGI:1917794	Tmem242	0.781714
MGI:1333882	Adam15	1.30533	MGI:2448316	Hist2h2ac	0.675857
MGI:2384307	Rassf9	1.30513	MGI:1344408	Pebp1	0.735338
MGI:99551	Cdh13	1.30319	MGI:1922855	Kdm5b	0.828939
MGI:1919132	Serinc2	1.30303	MGI:96916	Maob	0.763424
MGI:1341907	Fjx1	1.30274	MGI:107285	Ctsh	0.644522
MGI:1924145	Bicd2	1.30256	MGI:3801723	Gm15981	0.663488
MGI:3041196	Fam198a	1.30127	MGI:2448425	Hist1h4f	0.613693
MGI:1330284	Slc16a7	1.30114	MGI:103267	Eif4ebp1	0.785649
MGI:1277114	Ptgfrn	1.30048	MGI:2442544	Dars	0.807962
MGI:1347048	Clcn7	1.2996	MGI:2677849	Ccbl2	0.782128
MGI:95278	Epha2	1.29926	MGI:3646644	Gm6576	0.742901
MGI:97769	Prnp	1.29907	MGI:3644404	Gm5093	0.680051
MGI:1933137	Cttnbp2nl	1.29895	MGI:1917716	Ckap2l	0.704785
MGI:2443088	Radil	1.29887	MGI:1928760	Ruvbl1	0.78943
MGI:107166	Vipr2	1.29882	MGI:3780479	Gm2308	0.678383
MGI:2147570	Marveld1	1.29875	MGI:1340024	Aldh1l1	0.747613
MGI:2445107	Tmem245	1.29854	MGI:4937064	Gm17430	0.783316
MGI:1914692	Retsat	1.29843	MGI:87921	Adh1	0.738403
MGI:2676898	Mir23b	1.29821	MGI:2153480	Atp6v0a4	0.572054
MGI:2678949	Sh3tc1	1.29794	MGI:2448419	Hist1h4a	0.689801
MGI:104902	Gpc4	1.29716	MGI:1923381	Depdc1a	0.704723
MGI:3711310	9930111J21Rik2	1.2963	MGI:106582	Rfx3	0.846899
MGI:3036247	Lmtk2	1.29612	MGI:3650466	Gm13183	0.614763
MGI:5452898	Gm23121	1.29597	MGI:2677480	Thoc6	0.823729
MGI:1922169	Slc35f6	1.29566	MGI:3651070	Gm13352	0.779058
MGI:1922925	Mfsd6	1.2951	MGI:96689	Krt15	0.711048
MGI:892986	Spib	1.29504	MGI:3650260	Gm11531	0.792883
MGI:96902	Lyz1	1.29489	MGI:88115	Atp5a1	0.868856
MGI:1929213	Zbtb20	1.29467	MGI:97552	Pgam1	0.75145
MGI:2387642	Cxcl17	1.29407	MGI:1913697	Mgst3	0.737266
MGI:2386607	Abca5	1.29403	MGI:97621	Plk1	0.635228
MGI:1341430	Myom1	1.29344	MGI:1915469	Nudt21	0.717974
MGI:107949	Rhob	1.29336	MGI:1919618	2310045N01Rik	0.779616
MGI:2685325	Hspb6	1.29296	MGI:2153072	Trim37	0.864983
MGI:1099818	Pkd2	1.29255	MGI:3647120	Gm16379	0.618215
MGI:3524944	Stfa2l1	1.29224	MGI:1913099	Psrc1	0.795194
MGI:2144566	Tsr1	1.29219	MGI:96738	l7Rn6	0.787789
MGI:96431	Cd79b	1.29182	MGI:106095	Naca	0.725944
MGI:1347244	Axl	1.2908	MGI:95421	Esd	0.797857
MGI:106689	Selplg	1.29059	MGI:2183453	Dlgap5	0.667329
MGI:95405	Ephx1	1.29034	MGI:1353432	Timm13	0.796752
MGI:106321	Dock9	1.29019	MGI:1917349	Smc4	0.782767
MGI:1925751	Itih5	1.28991	MGI:3648418	Gm5963	0.740465
MGI:88555	Ctla2b	1.28982	MGI:109238	Shfm1	0.736614
MGI:95586	Fst	1.28929	MGI:1913690	Cdc26	0.796621
MGI:88253	Car8	1.28912	MGI:1334448	Aspm	0.694012
MGI:104568	Hcls1	1.28873	MGI:3643219	Gm5070	0.728084
MGI:1196464	Emr4	1.28807	MGI:1353578	Pttg1	0.73263
MGI:1920352	Slc22a23	1.28756	MGI:1352630	Abcc9	0.717793
MGI:1926002	Csgalnact2	1.28755	MGI:1313302	Cenpf	0.691388
MGI:102473	mt-Tt	1.28623	MGI:1914286	Mrpl45	0.826807
MGI:1916111	1190002N15Rik	1.2862	MGI:1913316	Gng11	0.749241
MGI:1196458	Scarb2	1.28532	MGI:3652062	Gm13688	0.732595
MGI:103559	Sox18	1.28531	MGI:1196274	Cdca8	0.747487
MGI:98495	Tbx3	1.28489	MGI:1919950	Zfp618	0.856289
MGI:1315202	Slit3	1.28489	MGI:1914879	Spc24	0.767656
MGI:1891924	Pcnx	1.28482	MGI:1923718	Uhrf2	0.837277
MGI:1920940	Glipr1	1.28452	MGI:87978	Ak2	0.787408
MGI:1860494	Ddx21	1.28436	MGI:3644181	Gm5445	0.731451
MGI:105376	Adam9	1.28397	MGI:95908	H2-Ke2	0.798852
MGI:107899	Cd36	1.28342	MGI:2429498	Gprc6a	0.787068
MGI:1313258	Slfn2	1.28304	MGI:1351663	Skp2	0.781504
MGI:96543	Il1b	1.283	MGI:2448383	Hist1h2bf	0.678147
MGI:2138319	Trp53bp2	1.28154	MGI:108403	Polr1d	0.772598
MGI:1918829	Tcta	1.28152	MGI:2679008	Fhod1	0.844836
MGI:1915512	Agpat4	1.2811	MGI:3651606	Gm13213	0.730486
MGI:103181	Sod3	1.28109	MGI:3650608	Gm11942	0.782741
MGI:1096360	Cd151	1.28064	MGI:1914517	Uqcc2	0.807261
MGI:104960	Tnfaip2	1.28033	MGI:3644633	Gm5805	0.743843
MGI:1858226	Slc5a3	1.28007	MGI:1098767	Sgol2	0.754333
MGI:1927073	Slc29a1	1.28	MGI:3646863	Gm8129	0.732086
MGI:1202296	Sorl1	1.27991	MGI:88350	Cdc25c	0.752848
MGI:88330	Cd37	1.2797	MGI:1346333	Mrps12	0.749974
MGI:1930923	Slurp1	1.27965	MGI:1098230	Cenpe	0.713743
MGI:1338946	Acvrl1	1.27917	MGI:3651389	Gm13456	0.787124
MGI:96930	Mcc	1.27913	MGI:106054	Psmc1	0.801656
MGI:2139742	AI504432	1.2787	MGI:104978	Cyp7b1	0.80988
MGI:5141963	Gm20498	1.2785	MGI:1349439	Cops6	0.778498
MGI:94919	Dpp4	1.2783	MGI:1915293	N6amt2	0.767034
MGI:1914502	Cap2	1.27779	MGI:3647110	Rpl5-ps1	0.748432
MGI:88177	Bmp2	1.27732	MGI:3647516	Gm4968	0.757395
MGI:2655574	Ostm1	1.2773	MGI:1915403	Gtf2e2	0.823257
MGI:103574	Amph	1.27705	MGI:2442035	Atp5g3	0.829163
MGI:87999	Alox5	1.27699	MGI:1341859	Gstz1	0.777011
MGI:1917186	Tspan18	1.27696	MGI:104708	Cct3	0.775719
MGI:1277961	Plec	1.27679	MGI:1913462	Sec61b	0.739471
MGI:2149010	Dock2	1.27673	MGI:3708786	Gm10358	0.791522
MGI:2148896	Palmd	1.27629	MGI:88302	Ccnb1	0.612601
MGI:1914783	Ppfibp1	1.27607	MGI:1913672	Dctpp1	0.799095
MGI:107286	Man2b1	1.27605	MGI:1914227	Nuf2	0.643893
MGI:2384789	Tmem63a	1.27582	MGI:1289164	Ncaph2	0.834485
MGI:1346321	Adamts5	1.2752	MGI:1315201	Grcc10	0.800893
MGI:109563	Cxcr4	1.27501	MGI:3649777	Gm11821	0.728009
MGI:2176882	Tlr7	1.27468	MGI:1355315	Tmod3	0.822851
MGI:1890077	Foxo1	1.27454	MGI:1328321	Bex1	0.738896
MGI:2676311	Crybg3	1.27446	MGI:98239	Scd1	0.698261
MGI:2686394	Nckap5	1.27367	MGI:1916884	Clybl	0.738683
MGI:1921346	Hvcn1	1.27257	MGI:1098533	Ints9	0.837663
MGI:108392	Slc20a1	1.27249	MGI:1931797	Ckap2	0.761048
MGI:1354735	Atp11a	1.2719	MGI:3651005	Gm13436	0.769307
MGI:97311	Nfix	1.27175	MGI:2136761	Fzd10	0.882007
MGI:103013	Cacna1c	1.27129	MGI:98812	Tpmt	0.797231
MGI:1859388	Dll4	1.27129	MGI:1352462	Nr1h3	0.817517
MGI:1918077	Trak2	1.27128	MGI:1914134	Appbp2	0.874204
MGI:2443787	Rnf152	1.27111	MGI:96247	Hsp90ab1	0.853971
MGI:1915982	Lrrc16a	1.27043	MGI:104813	Jarid2	0.851329
MGI:2183149	Nadk	1.27009	MGI:1925059	Lrrc42	0.83681
MGI:1314872	Hipk2	1.26932	MGI:1913375	Sf3b5	0.744603
MGI:3036245	Ralgapa2	1.2691	MGI:1098258	Kif15	0.707312
MGI:2145890	Ano6	1.26889	MGI:104890	Tpt1	0.659928
MGI:2179523	Fcgr4	1.26887	MGI:1354721	Slc25a13	0.677263
MGI:1915044	Shisa5	1.26886	MGI:1919641	Cdkn3	0.781077
MGI:106183	Ocln	1.26867	MGI:3705507	Gm14586	0.680278
MGI:105107	P2ry2	1.26853	MGI:1915271	Bphl	0.795807
MGI:1915440	5330426P16Rik	1.26843	MGI:3588195	Adamts17	0.746514
MGI:109628	Dnase1l1	1.268	MGI:1914930	Sdhb	0.765695
MGI:97599	Prkce	1.26775	MGI:1351620	Mrpl39	0.868712
MGI:1929286	Amotl2	1.26721	MGI:3648524	Gm4832	0.806583
MGI:2136752	Pcdhb16	1.26691	MGI:1194513	Psmb5	0.756816
MGI:2442042	Dpep2	1.2669	MGI:2148050	C77370	0.816266
MGI:1921289	Nfam1	1.26643	MGI:3704247	Rpl35a-ps5	0.675184
MGI:2686925	Cyb561a3	1.26581	MGI:1917606	St13	0.850492
MGI:2137431	Bpifb1	1.26433	MGI:3642393	Gm10169	0.717924
MGI:2385067	Lims2	1.26363	MGI:1925836	Srbd1	0.848616
MGI:1919619	Ehd4	1.26346	MGI:1920181	Swi5	0.822033
MGI:96417	Ids	1.26329	MGI:1922679	Fam183b	0.737875
MGI:101769	Mcl1	1.26327	MGI:2146335	C330027C09Rik	0.688243
MGI:1098726	Emp2	1.26306	MGI:98954	Wnt2	0.728122
MGI:1349163	Sdc3	1.26285	MGI:2675669	Nusap1	0.703016
MGI:1923241	Slain2	1.26164	MGI:94917	Dpep1	0.62038
MGI:2444343	Nbeal1	1.26099	MGI:96909	Maf	0.846604
MGI:3590645	B130055M24Rik	1.26094	MGI:104767	Gpx4	0.779824
MGI:107399	Il17ra	1.26076	MGI:108470	St6gal1	0.798736
MGI:2685731	Milr1	1.26015	MGI:1913402	Uqcr10	0.781594
MGI:2663511	Reps2	1.25922	MGI:3641791	Gm10051	0.671799
MGI:107956	Slc8a1	1.25886	MGI:94876	Ddc	0.808201
MGI:1860040	Trim3	1.25851	MGI:1202302	Pms1	0.847843
MGI:1313277	Vamp2	1.25825	MGI:1855692	Nono	0.831914
MGI:1918264	Megf9	1.25809	MGI:3704324	Rps12-ps9	0.633474
MGI:99421	Nfe2l1	1.25725	MGI:1274781	Robo1	0.811678
MGI:105383	Il18r1	1.2563	MGI:1890564	Rcan1	0.763234
MGI:102701	Lilrb4	1.25622	MGI:1916491	Polr2d	0.813586
MGI:3807521	Sirpb1c	1.2558	MGI:1917493	Wdr61	0.81196
MGI:104661	Rora	1.25568	MGI:1913456	1110059E24Rik	0.787384
MGI:97363	Notch1	1.25529	MGI:1890359	Igf2bp3	0.823221
MGI:1352754	Clic4	1.25458	MGI:2448436	Hist1h4j	0.786795
MGI:1196224	Cdk8	1.25385	MGI:1926237	Mrps30	0.842496
MGI:894670	Ldb2	1.25368	MGI:1913482	Sssca1	0.808646
MGI:2446134	Sidt2	1.25309	MGI:1922567	Parpbp	0.764915
MGI:1338013	Cbfa2t3	1.25289	MGI:1924165	Mnd1	0.817237
MGI:1927657	Ms4a8a	1.25283	MGI:108069	Ccna2	0.630626
MGI:2442940	Slc41a2	1.25257	MGI:98790	Top2a	0.591417
MGI:1929064	Chst12	1.25248	MGI:1915451	Ccdc34	0.805765
MGI:1924143	Cers2	1.25093	MGI:88057	Apoe	0.634451
MGI:1194490	Diap1	1.25072	MGI:3801865	Gm16020	0.595849
MGI:1924100	Ago4	1.25049	MGI:96976	Mgp	0.726267
MGI:98262	Ccl5	1.25039	MGI:1931744	Uck2	0.862755
MGI:97846	Rac2	1.25019	MGI:2145099	Mis18bp1	0.750103
MGI:1915730	1110007C09Rik	1.24909	MGI:1915115	Rgs10	0.847511
MGI:103298	Apobec1	1.24905	MGI:109598	Hsd3b6	0.739534
MGI:2687005	Leprot	1.24888	MGI:2448439	Hist1h4k	0.72995
MGI:106687	Pon2	1.24852	MGI:87979	Ak4	0.809173
MGI:1330818	Qsox1	1.2483	MGI:1914178	Tmem261	0.789496
MGI:1928401	Clip1	1.24808	MGI:104885	Psma2	0.772333
MGI:1098267	Ogdh	1.24799	MGI:5452031	Gm22254	0.783622
MGI:1914939	Aldh3b1	1.24788	MGI:1915127	Naa20	0.744436
MGI:3045256	Fat4	1.24732	MGI:1931256	Cubn	0.868625
MGI:3606214	Lpcat2	1.24702	MGI:1932491	Prp2	0.738557
MGI:1196326	Ncald	1.24659	MGI:1923036	Ckap5	0.829079
MGI:894320	Prdx6	1.24654	MGI:1316715	Cox7a2	0.787542
MGI:1918573	Rassf8	1.2465	MGI:97463	P4ha1	0.772849
MGI:3612676	Ccdc68	1.24649	MGI:99557	Pde4b	0.772161
MGI:1355313	C1ra	1.24635	MGI:1095401	Hrsp12	0.677962
MGI:95762	Gm2a	1.24596	MGI:2144013	Xpo1	0.793806
MGI:2654703	Otud7b	1.24576	MGI:109531	Cdc37	0.806021
MGI:1921982	Stx11	1.24556	MGI:1913787	Pomp	0.788037
MGI:1919293	Sulf2	1.24555	MGI:3646144	Gm7251	0.730901
MGI:97527	Pdgfa	1.24459	MGI:1919069	Kif23	0.685745
MGI:2183153	Pkhd1l1	1.24455	MGI:1913491	Tmem9	0.813585
MGI:97531	Pdgfrb	1.24428	MGI:3643110	Gm8186	0.838455
MGI:5456174	Gm26397	1.24385	MGI:108564	Meis2	0.820356
MGI:2442695	Creb3l2	1.24367	MGI:88607	Cyp2e1	0.694168
MGI:1858430	Scarf2	1.2432	MGI:107184	Cct7	0.829343
MGI:1330223	Papss2	1.24304	MGI:1333855	Atox1	0.804475
MGI:1919257	Fndc3b	1.24286	MGI:1098257	Psmb4	0.714971
MGI:1933966	Mcam	1.24259	MGI:99510	Tmsb4x	0.835669
MGI:2676556	Akap13	1.24252	MGI:3641865	Gm10357	0.722328
MGI:96650	Jup	1.24232	MGI:1858232	Nudt5	0.79479
MGI:1298393	Sh3pxd2a	1.24231	MGI:2685899	Zcwpw1	0.835355
MGI:104908	Ptk2b	1.24223	MGI:2444912	Mbnl3	0.822467
MGI:1913440	Acer3	1.24189	MGI:1859815	Prdx4	0.774431
MGI:1922011	Mxra8	1.24182	MGI:2444777	Ncaph	0.776906
MGI:1926805	Foxj2	1.24055	MGI:1333880	Hebp1	0.663817
MGI:1332236	Cds2	1.23881	MGI:1916905	Cd164l2	0.728449
MGI:1099439	Stk10	1.23842	MGI:1928894	Rpl35a	0.75363
MGI:98923	Vav1	1.23824	MGI:96836	Lta4h	0.836242
MGI:109544	Aim1	1.23801	MGI:1202715	Tcf21	0.794547
MGI:2181192	Ripply3	1.23762	MGI:97520	Pcx	0.683618
MGI:1930153	Popdc3	1.23756	MGI:1924705	Rlf	0.840734
MGI:106028	Rhoc	1.23655	MGI:1913479	Rpl7l1	0.836977
MGI:1346327	Fyb	1.23595	MGI:2447167	Cmtm8	0.798552
MGI:1915587	Crip2	1.23553	MGI:1913730	Rpl15	0.469752
MGI:1918979	Rgs12	1.2346	MGI:1306785	Ugdh	0.83522
MGI:2153183	Kcnn3	1.23457	MGI:2138383	Gtf3c3	0.866032
MGI:105377	Adam19	1.23457	MGI:1918780	Gas2l3	0.715576
MGI:2388637	Wwc1	1.23445	MGI:1923847	Gins4	0.834805
MGI:98729	Tgfbr2	1.23419	MGI:1919433	Snx6	0.813159
MGI:2444029	Ankrd52	1.23411	MGI:1914380	Ndufa6	0.748052
MGI:1918954	Arhgef3	1.2339	MGI:1858197	Plrg1	0.867557
MGI:2444741	Olfml2a	1.2336	MGI:5439880	DQ267102	0.689542
MGI:1923373	Gpsm2	1.23267	MGI:3650249	Rps18-ps1	0.791599
MGI:1914649	Pdlim7	1.23258	MGI:1923714	Casc5	0.69202
MGI:2447427	Tgfbrap1	1.2325	MGI:2443934	Zfp799	0.848016
MGI:2142979	Dennd4a	1.23247	MGI:3646708	Gm16409	0.70225
MGI:1100842	Gfra1	1.2323	MGI:2156764	Stard4	0.816559
MGI:1914170	Rnpepl1	1.23201	MGI:1913371	Chchd1	0.775855
MGI:1891250	Gprc5a	1.23191	MGI:2448320	Hist1h3c	0.677223
MGI:98497	Tbxas1	1.23177	MGI:1913560	Dpy30	0.828555
MGI:99432	Arf3	1.23175	MGI:1933744	Cenpq	0.807798
MGI:1915442	Leprotl1	1.23128	MGI:1343135	Ndufs4	0.782248
MGI:1921738	Lrrc15	1.23118	MGI:1927470	Spag5	0.750213
MGI:1914210	Fam188a	1.23021	MGI:1913328	Tsen34	0.655405
MGI:1338076	Hivep2	1.22993	MGI:3649478	Gm12350	0.792114
MGI:98728	Tgfbr1	1.22988	MGI:3641818	Rpl17-ps9	0.742539
MGI:1917347	Sash1	1.22954	MGI:2146198	Ttc38	0.829202
MGI:1891835	Hdac7	1.2294	MGI:3782011	Gm3839	0.700654
MGI:2443881	Rasal2	1.22875	MGI:1349423	Racgap1	0.667606
MGI:107728	Myo1d	1.22874	MGI:1341163	Tacc3	0.735403
MGI:95458	Evi2a	1.22873	MGI:2448457	Hist1h2ai	0.795229
MGI:95775	Gnao1	1.22873	MGI:1346319	Hax1	0.798431
MGI:97897	Rel	1.22844	MGI:3705640	Rps2-ps13	0.806248
MGI:2177178	Dicer1	1.22756	MGI:2135637	Park7	0.806374
MGI:1346883	Map4k2	1.22756	MGI:2389572	Brcc3	0.827523
MGI:1931551	Rhoj	1.22733	MGI:1914353	Ptgr1	0.802028
MGI:107357	Inpp5d	1.2272	MGI:1916394	Slirp	0.716783
MGI:1914400	Rnf141	1.22716	MGI:1914449	Pfdn1	0.834456
MGI:1933177	Pik3ap1	1.22663	MGI:1913781	Cmc2	0.796377
MGI:1919979	Cdc42se2	1.22654	MGI:1913475	Llph	0.833616
MGI:1921701	Pgs1	1.22589	MGI:3704410	Rpl9-ps4	0.812035
MGI:1196251	Casz1	1.22579	MGI:3651377	Gm12017	0.808439
MGI:108077	Nptn	1.2256	MGI:1196223	D8Ertd82e	0.80615
MGI:1341800	Hey1	1.2249	MGI:3651840	Gm11599	0.8481
MGI:2444879	Fam65b	1.22485	MGI:3648968	Gm5921	0.81765
MGI:97631	Pmp22	1.2247	MGI:96817	Lox	0.660206
MGI:1333844	Slc31a2	1.22461	MGI:1914862	Mettl9	0.802002
MGI:104685	Twist2	1.2246	MGI:3041235	Ska3	0.757322
MGI:1352752	Pde7b	1.22417	MGI:1890613	Pes1	0.869956
MGI:97005	Mmp12	1.22391	MGI:1918110	Sept10	0.837736
MGI:1927237	Cgn	1.22387	MGI:107687	Mdfi	0.86103
MGI:2137513	Slc24a3	1.22303	MGI:1098693	Tet1	0.841626
MGI:107673	Akr1b8	1.22239	MGI:2448322	Hist1h3d	0.799655
MGI:1922862	Gns	1.22236	MGI:1196256	Kdm1a	0.865928
MGI:2142598	Slc7a6	1.22226	MGI:2684916	Ppp1r36	0.797956
MGI:103264	Arhgef2	1.2222	MGI:96157	Hmgb2	0.667479
MGI:2153063	Parvb	1.22161	MGI:3704242	Gm10136	0.562055
MGI:109561	Sp100	1.22136	MGI:1860374	Mad2l1	0.689652
MGI:1914399	Nkain1	1.22066	MGI:1929988	Klf15	0.716633
MGI:99473	Arrb1	1.22063	MGI:87867	Acadm	0.797726
MGI:1354386	Lats2	1.2206	MGI:108016	Rad21	0.859942
MGI:5452232	Gm22455	1.22047	MGI:106201	Tmed1	0.838725
MGI:2148866	Krt23	1.2204	MGI:3644930	Gm8172	0.810446
MGI:2446213	Themis2	1.22011	MGI:1100510	Bub1	0.661126
MGI:97616	Plcg2	1.2201	MGI:3652107	Rpl17-ps1	0.72792
MGI:1346049	Hs2st1	1.22009	MGI:109553	Ctsc	0.815432
MGI:2384986	Rnf144b	1.22001	MGI:3645348	Rpl27-ps1	0.778119
MGI:2388480	Ppp2r5b	1.21995	MGI:1915191	Rps27l	0.726403
MGI:1351646	Abca7	1.21955	MGI:1914394	Lrrc40	0.846617
MGI:2447165	Cmtm6	1.21921	MGI:1929711	Anapc7	0.858448
MGI:2682314	Zc3h4	1.21878	MGI:3649712	Gm14026	0.768387
MGI:96547	Il1rn	1.21862	MGI:1913944	Uqcrfs1	0.811783
MGI:109325	F7	1.21827	MGI:3643688	Gm9174	0.82354
MGI:1915671	Lmbrd1	1.21767	MGI:2385155	Btbd3	0.780828
MGI:1201679	Cxadr	1.21735	MGI:1915625	Ndufa8	0.778188
MGI:2444054	Arl11	1.21714	MGI:106035	Mki67	0.663087
MGI:95522	Fgfr1	1.21707	MGI:1858961	Prc1	0.662352
MGI:1261872	Wwc2	1.21686	MGI:88181	Bmp5	0.769513
MGI:3045258	Stard9	1.21661	MGI:1859328	Cpsf3	0.805518
MGI:2446138	Phactr2	1.21641	MGI:1343176	Timm17b	0.823142
MGI:95832	Grn	1.21576	MGI:2137215	Mrpl11	0.826033
MGI:2682634	Enpp4	1.21529	MGI:1915097	Sncaip	0.852253
MGI:1919196	Endod1	1.21481	MGI:2660674	Mrpl21	0.829966
MGI:1932515	Plekha3	1.21405	MGI:99607	Abca1	0.732102
MGI:2443511	Slc9a6	1.21397	MGI:1098271	Rgs2	0.725719
MGI:97371	Npr1	1.21356	MGI:3647258	Gm5121	0.80354
MGI:109523	Trpc6	1.21284
MGI:1914829	Cpeb4	1.21245
MGI:104591	Nbl1	1.21242
MGI:96629	Jak2	1.21228
MGI:88457	Col5a1	1.21138
MGI:1917275	Acot7	1.21071
MGI:3045338	Mettl24	1.21065
MGI:3527792	Zdhhc18	1.21048
MGI:1931123	Inpp4a	1.21015
MGI:96790	Lipe	1.20987
MGI:1346876	Map3k5	1.209
MGI:1926283	Tmem8	1.20856
MGI:2445415	Pknox2	1.20835
MGI:3584510	Wdfy4	1.20831
MGI:1860513	Fnbp4	1.20782
MGI:2441950	Lphn3	1.20779
MGI:1333854	Gab2	1.2075
MGI:1920999	Ttc7	1.20741
MGI:2443132	Lrp12	1.20739
MGI:1098699	Esyt3	1.2071
MGI:97874	Rb1	1.20694
MGI:96623	Itpr1	1.20692
MGI:2138232	Colgalt2	1.20645
MGI:1919722	Slc16a10	1.20589
MGI:1099462	She	1.20586
MGI:1915677	Slc39a13	1.20526
MGI:88513	Cr1l	1.20471
MGI:1915428	Cgnl1	1.20453
MGI:1915743	Ndufaf4	1.20413
MGI:1333766	Epn2	1.20358
MGI:1923258	Nabp1	1.20319
MGI:2443895	Fry	1.20298
MGI:2147790	Fermt3	1.20281
MGI:1924470	Tmem200a	1.20226
MGI:98373	Sparc	1.20222
MGI:1920399	Clec4a3	1.2016
MGI:1890464	Ear10	1.20139
MGI:108559	Macf1	1.20036
MGI:1914226	2410002F23Rik	1.20007
MGI:98388	Sptbn1	1.19968
MGI:1332247	Slc33a1	1.19955
MGI:1888978	Ntn4	1.19919
MGI:1918940	Esm1	1.19907
MGI:2441841	Cdc42bpa	1.19875
MGI:3045243	Ankrd44	1.19865
MGI:1859307	Unc93b1	1.19855
MGI:1270152	Reep5	1.19839
MGI:1933209	Tm6sf1	1.19785
MGI:1097696	Rem1	1.19772
MGI:1927091	Myo1g	1.19717
MGI:1859650	Ramp2	1.1971
MGI:96824	Tlr4	1.19622
MGI:107465	Plcb2	1.19595
MGI:1922056	Tmem106a	1.19476
MGI:88035	Aox1	1.19473
MGI:1289258	Wdr96	1.19448
MGI:107560	Sema4a	1.19356
MGI:2442524	Heatr1	1.19344
MGI:2443306	Tom1l2	1.1933
MGI:107752	Myo1b	1.19323
MGI:1925482	Trappc6b	1.19302
MGI:1916882	Arhgef12	1.19241
MGI:1921164	Irak3	1.19224
MGI:5000466	Anpep	1.19195
MGI:95802	Gpt	1.19148
MGI:1930704	Bhlhe41	1.19122
MGI:2387123	Lnpep	1.19092
MGI:107617	Igkv19-93	1.19027
MGI:1925666	Rnase6	1.18894
MGI:1888994	Fmnl1	1.1875
MGI:2137356	Trim16	1.18734
MGI:2385331	Stard13	1.18677
MGI:894316	Mknk1	1.18568
MGI:1341908	Uhmk1	1.18539
MGI:97175	Map2	1.18519
MGI:1196356	Iqsec1	1.18476
MGI:2153249	AF251705	1.18454
MGI:1926195	Ylpm1	1.18385
MGI:1929004	Stk4	1.18299
MGI:1915802	Smim14	1.18254
MGI:88047	Aplp2	1.18228
MGI:1097153	Cx3cl1	1.18098
MGI:1914789	Dock6	1.18009
MGI:1918970	Osbpl3	1.18004
MGI:2443472	Atf7	1.17728
MGI:108176	Prx	1.17709
MGI:97302	Nedd9	1.17661
MGI:101762	Elk3	1.17622
MGI:2145021	Trib2	1.17591
MGI:87997	Alox15	1.1755
MGI:2442213	Plekha1	1.17505
MGI:96617	Cd47	1.1749
MGI:1923692	Slamf9	1.17382
MGI:2148811	Npnt	1.17275
MGI:1202729	Art3	1.17228
MGI:1933156	Acox3	1.17115
MGI:2429603	Irak2	1.1711
MGI:2143897	Fam26e	1.16822
MGI:2140279	Tdrd7	1.16799
MGI:97851	Slc20a2	1.16781
MGI:2687284	Pfkfb4	1.16669
MGI:2153525	Muc4	1.16601
MGI:104720	Hsd11b2	1.16535
MGI:1914116	Nhlrc2	1.16485
MGI:97783	Psap	1.1641
MGI:2158329	Parvg	1.16365
MGI:1889024	Cd200r1	1.16356
MGI:1860440	Bace2	1.16282
MGI:1341839	Nod1	1.16262
MGI:95808	Gria1	1.16172
MGI:1921802	Nipal3	1.16165
MGI:1933366	Sytl2	1.16136
MGI:1891291	Kcnk6	1.16071
MGI:1923691	Daam2	1.15926
MGI:107700	Casp4	1.15922
MGI:2138647	Fcrla	1.15882
MGI:1344424	Osr1	1.1571
MGI:88059	App	1.15645
MGI:1922830	Zbtb4	1.1557
MGI:1928370	Rhog	1.15354
MGI:1354946	Mapk6	1.15252
MGI:106066	Ptafr	1.15014
MGI:2384784	Eif4g1	1.14973
MGI:99698	Clock	1.14592
MGI:2181676	Ackr4	1.14241
MGI:3698419	I830012O16Rik	1.14156
MGI:1921479	Paqr8	1.1397
MGI:97598	Prkcd	1.13237
MGI:97600	Prkch	1.12851
MGI:2443207	Plekhm1	1.11848
MGI:5452348	Gm22571	1.11789
MGI:109591	Nfic
MGI:1918788	Fbxo9
MGI:88263	Capn1
MGI:1921353	Nebl
MGI:101948	Wnt11
MGI:1921381	Sash3
MGI:1913401	Prr13
MGI:1914228	Luc7l
MGI:107265	Cpd
MGI:1926884	Huwe1
MGI:107476	Stim1
MGI:2176887	Tlr8
MGI:1336166	Cflar
MGI:2441670	Pbxip1
MGI:1100496	Fmo3
MGI:2659021	Phactr1
MGI:1339957	P2rx7
MGI:1099800	Nfkb2
MGI:1354742	Synrg
MGI:1915051	Pllp
MGI:1332238	Bcl7b
MGI:1926375	Rassf5
MGI:1928482	Mbnl1
MGI:88930	Reep3
MGI:96745	Lamp1
MGI:3043001	AB124611
MGI:1350931	Tcirg1
MGI:2147731	Slc25a45
MGI:96628	Jak1
MGI:2444725	Tmem154

## Sheet: ALV1vsALV2
UPREGULATED			DOWNREGULATED
MGI_ID	Symbol	FoldChange	MGI_ID	Symbol	FoldChange
MGI:2148811	Npnt	1.18647	MGI:2384860	Slc44a3	0.62198
MGI:2144013	Xpo1	1.16679	MGI:2442485	Myo5c	0.631229
MGI:1917672	Ints2	1.16375	MGI:95411	Erbb3	0.489037
MGI:1195263	Lims1	1.11515	MGI:1924444	Tmem139	0.591895
MGI:1351331	Chaf1a	1.16675	MGI:1890358	Igf2bp2	0.614175
MGI:88175	Manba	1.15213	MGI:1346016	Arhgef28	0.682904
MGI:96187	Hoxb6	1.14147	MGI:3781032	Kcnj13	0.588779
MGI:1914453	Nde1	1.16943	MGI:1924661	Esrp2	0.685181
MGI:2136744	Pcdhb9	1.15285	MGI:1920325	Ppil6	0.694001
MGI:1923189	4930579G24Rik	1.19182	MGI:101782	Scnn1a	0.512085
MGI:102726	Dck	1.23969	MGI:1096350	Fgfbp1	0.676125
MGI:1930079	Fads2	1.2445	MGI:1915213	Npc2	0.606569
MGI:95925	H2-Ob	1.17029	MGI:2388029	Liph	0.544544
MGI:1298398	Mcm7	1.26187	MGI:2685591	Kcnrg	0.70104
MGI:1349448	Cenph	1.20449	MGI:1919210	Myh14	0.618792
MGI:1351663	Skp2	1.16172	MGI:2139014	Osbpl6	0.726254
MGI:107848	Tubb4a	1.18415	MGI:1924712	Tmem116	0.695568
MGI:2448316	Hist2h2ac	1.26897	MGI:3650036	Gm13244	0.698243
MGI:2143537	Tmem26	1.22421	MGI:1889842	Fam13a	0.681043
MGI:3576783	Eme1	1.13938	MGI:1917997	Tspan2	0.561662
MGI:2384945	Samd14	1.17312	MGI:2139461	Tmem62	0.681888
MGI:3606242	Nostrin	1.19398	MGI:109162	Gpam	0.682051
MGI:1918944	Ipo9	1.22946	MGI:2158417	Rtkn2	0.675421
MGI:96610	Itgb1	1.10342	MGI:1858225	Tuba8	0.659544
MGI:104963	Npy1r	1.14117	MGI:1353586	Lmo7	0.643632
MGI:96616	Itgb7	1.14457	MGI:2146607	Clic6	0.67969
MGI:2685011	Dchs1	1.21251	MGI:1289258	Wdr96	0.758429
MGI:1346091	Fbln5	1.25149	MGI:1914618	Fam154b	0.743174
MGI:894806	Mylk	1.19891	MGI:1354388	Spag6	0.739371
MGI:107818	Mrc2	1.29011	MGI:108067	Nkx2-1	0.730693
MGI:1354184	Nox4	1.22431	MGI:1289279	Dnah9	0.758952
MGI:2443160	Pag1	1.20911	MGI:2135605	Pard6b	0.665682
MGI:3646284	Ighv1-12	1.76752	MGI:103297	Atp7b	0.569683
MGI:103188	Nfib	1.15718	MGI:2443100	Bend7	0.695639
MGI:2448320	Hist1h3c	1.3011	MGI:1923810	Prss8	0.633449
MGI:97530	Pdgfra	1.29411	MGI:1913101	Cldn10	0.617574
MGI:1347346	Adamts7	1.17153	MGI:107720	Dnah12	0.714883
MGI:104559	Rcn1	1.1812	MGI:1924214	2610028H24Rik	0.677424
MGI:1919890	Mex3a	1.17821	MGI:1277238	Wdr52	0.692453
MGI:95933	H2-Q4	1.74293	MGI:2385017	Nrbp2	0.674023
MGI:1926017	Efcab11	1.14158	MGI:1859553	Lrrc6	0.759257
MGI:1914391	Fbxo5	1.30298	MGI:1921384	Cyp2s1	0.619313
MGI:2137431	Bpifb1	1.5797	MGI:1918974	Aox3	0.64363
MGI:1917188	Scrn1	1.18674	MGI:894688	Serpinb6b	0.583732
MGI:1859016	Ddah2	1.25609	MGI:101836	Traf1	0.696826
MGI:88176	Bmp1	1.20697	MGI:109572	Tuft1	0.654929
MGI:109563	Cxcr4	1.19683	MGI:103295	Pon1	0.499322
MGI:1346086	Aplnr	1.31409	MGI:109611	Dsp	0.674891
MGI:1928144	Plekha2	1.20868	MGI:1916776	Fmo2	0.442947
MGI:1098434	Rgs5	1.31198	MGI:1926051	Ak7	0.754583
MGI:1913390	Ska2	1.21644	MGI:96434	Igf2	0.585624
MGI:104592	Myef2	1.18331	MGI:1928009	Vsig2	0.699098
MGI:2145425	Depdc1b	1.21036	MGI:1859149	Epb4.1l4b	0.774595
MGI:1914152	Mtap	1.19244	MGI:1330848	Atp8a1	0.716529
MGI:3649304	Gm12957	1.19878	MGI:1916316	1810010H24Rik	0.63815
MGI:102556	Tbx4	1.20129	MGI:2384294	Rbm47	0.650626
MGI:1339939	Rpa2	1.1894	MGI:3606159	Tmem243	0.594048
MGI:1924880	Prdm8	1.30513	MGI:1313266	Alcam	0.758083
MGI:894644	Cacnb2	1.21367	MGI:1920722	Spata18	0.712367
MGI:102891	Adcy7	1.20668	MGI:2442259	Gsap	0.729216
MGI:1329034	Ccne2	1.22446	MGI:1329044	Cldn3	0.579114
MGI:1921019	Gins2	1.19325	MGI:1338056	Klf5	0.680524
MGI:1919164	Antxr2	1.24446	MGI:1923017	Rab11fip1	0.645803
MGI:1354730	Rgs6	1.21119	MGI:1194490	Diap1	0.743658
MGI:3643058	Zbtbd6	1.13295	MGI:3027894	Rsph4a	0.710123
MGI:2154952	Ripk3	1.21105	MGI:1915130	Dcxr	0.646582
MGI:99959	Tgfbi	1.36107	MGI:1310000	Kcnj15	0.562757
MGI:98878	Tyms	1.20732	MGI:97520	Pcx	0.602286
MGI:2444418	Scara3	1.12746	MGI:1914323	Pi4k2b	0.619866
MGI:98834	Trp53	1.1949	MGI:98852	Tst	0.74503
MGI:1202069	Cdk2ap1	1.40363	MGI:1921846	Cds1	0.676117
MGI:103199	Mcm4	1.28616	MGI:1859606	Wdr45	0.590373
MGI:88182	Bmp6	1.26543	MGI:1918843	Llgl2	0.722031
MGI:96609	Itgax	1.27175	MGI:104564	Cdkn1c	0.709828
MGI:1298227	Mcm6	1.30417	MGI:1914055	Tspan1	0.644868
MGI:1926186	Wdr76	1.21554	MGI:2138143	AA986860	0.536195
MGI:1096361	Hn1	1.24712	MGI:2147716	Slc16a12	0.756831
MGI:94876	Ddc	1.22377	MGI:1341879	Zim1	0.659939
MGI:2384887	Chtf18	1.15021	MGI:2144423	Arhgap44	0.72521
MGI:2443695	Fam19a1	1.21731	MGI:107718	Dnah5	0.753678
MGI:1918110	2016-09-10	1.1649	MGI:1933754	Nedd4l	0.568503
MGI:2146005	Mtbp	1.20866	MGI:1919531	Sh2d4a	0.728392
MGI:2144727	Ddx1	1.16737	MGI:1919638	Ripk4	0.717685
MGI:1202065	Chek1	1.28513	MGI:106183	Ocln	0.755947
MGI:2444298	G2e3	1.16853	MGI:101781	Sntb1	0.782072
MGI:1860764	Pde3a	1.26072	MGI:2443778	A330021E22Rik	0.770886
MGI:1925666	Rnase6	1.19003	MGI:1922783	Nme5	0.763438
MGI:2679294	Zc4h2	1.18964	MGI:88026	Ank3	0.731327
MGI:88181	Bmp5	1.30946	MGI:106038	Lrrn1	0.719074
MGI:1924261	Ticrr	1.20141	MGI:1891250	Gprc5a	0.717015
MGI:99547	Iglc2	1.30851	MGI:1922208	4930485B16Rik	0.783455
MGI:1353621	Zfp354c	1.17529	MGI:3528937	Gramd2	0.740459
MGI:1920048	Lhfp	1.18027	MGI:97723	Pnliprp1	0.646681
MGI:95684	Gdf10	1.21192	MGI:2142763	Cyp4v3	0.61257
MGI:101900	Mmp14	1.17448	MGI:1915268	Col4a3bp	0.732294
MGI:97890	Rad51	1.27096	MGI:1927339	Mpp5	0.737556
MGI:1934811	Nucks1	1.29619	MGI:2446181	Slc37a1	0.694699
MGI:109523	Trpc6	1.16099	MGI:1916885	Dapk1	0.713233
MGI:1339957	P2rx7	1.16318	MGI:3026924	Fam84b	0.755397
MGI:1920546	Rhobtb3	1.15933	MGI:1347474	Foxj1	0.777467
MGI:99559	Mfap2	1.23514	MGI:1888992	Msln	0.507364
MGI:1889208	Cks1b	1.28431	MGI:2444274	Ccdc108	0.752191
MGI:97757	Prim1	1.32457	MGI:1917258	Ace2	0.731702
MGI:88255	Anxa6	1.26083	MGI:107930	Pip5k1b	0.623554
MGI:105380	Mcm2	1.34721	MGI:88108	Atp1b1	0.517751
MGI:102793	Fstl1	1.20873	MGI:1202402	Pde7a	0.672006
MGI:1197008	Wisp1	1.20752	MGI:88388	Cftr	0.713838
MGI:1196464	Emr4	1.24946	MGI:2388479	Ppp2r5a	0.769969
MGI:3039562	Taf9b	1.19906	MGI:87966	Agtr2	0.700582
MGI:1933825	Jam3	1.17378	MGI:2387609	Tmem63b	0.735475
MGI:1914403	Rnaseh2b	1.17599	MGI:104651	Cd82	0.743339
MGI:1316692	Igkj4	1.46711	MGI:1922725	Oplah	0.718446
MGI:1344407	Zeb2	1.17571	MGI:101924	Slc12a2	0.743944
MGI:1277214	2016-09-11	1.23294	MGI:1890359	Igf2bp3	0.752018
MGI:94890	Dhfr	1.21765	MGI:1918834	Gdpd2	0.385043
MGI:1921738	Lrrc15	1.20322	MGI:97172	Mt2	0.541257
MGI:1914872	Mxra7	1.21524	MGI:1202886	Meg3	0.747811
MGI:106209	Hells	1.35041	MGI:1917326	Esrp1	0.766168
MGI:1338073	Cdc45	1.23443	MGI:3036245	Ralgapa2	0.717706
MGI:2147810	Tmem132a	1.21731	MGI:88354	Cdh1	0.751511
MGI:1096340	E2f3	1.1837	MGI:2446136	Arrdc1	0.769056
MGI:98180	Rrm1	1.3291	MGI:1916579	1700003M02Rik	0.774686
MGI:95487	Fbln1	1.29793	MGI:1915748	Tspan11	0.593233
MGI:107812	Tubb5	1.31237	MGI:2684916	Ppp1r36	0.785538
MGI:102768	Mfge8	1.21025	MGI:1914762	Agpat2	0.755266
MGI:97475	Pam	1.24278	MGI:1913819	Gdpd1	0.619323
MGI:1858226	Slc5a3	1.22794	MGI:1922989	Mpp7	0.658198
MGI:1328362	Blm	1.20329	MGI:108466	Ralbp1	0.747658
MGI:1917274	Mcm10	1.18395	MGI:96825	Selenbp1	0.557641
MGI:1355321	Chek2	1.23118	MGI:106198	Stfa1	0.492465
MGI:894657	Serpinb8	1.2059	MGI:109326	Bnip3	0.602191
MGI:1933966	Mcam	1.21106	MGI:2685142	Olfm4	0.61276
MGI:1919810	Naalad2	1.21091	MGI:97231	Muc1	0.656226
MGI:1347520	Ror1	1.1651	MGI:1913975	Lrrk2	0.709626
MGI:2446854	Gpr64	1.24105	MGI:1923920	Ttc18	0.796232
MGI:103197	Mcm5	1.35206	MGI:2443248	Exph5	0.756702
MGI:1922667	Rspo2	1.29292	MGI:1919127	Efhc1	0.768559
MGI:2155936	Pask	1.17375	MGI:98931	Ezr	0.701038
MGI:1929213	Zbtb20	1.23332	MGI:104859	Selenbp2	0.611522
MGI:97876	Rbp1	1.24152	MGI:1926952	Cyb5	0.785647
MGI:1353494	Akr1b3	1.32036	MGI:2685410	Tmem212	0.782499
MGI:107914	Tia1	1.25081	MGI:1916577	1700007K13Rik	0.733569
MGI:109149	Nsg1	1.25897	MGI:104677	Man1a	0.774409
MGI:1277180	Ifi27	1.20752	MGI:1351617	Abca3	0.702409
MGI:101789	Lig1	1.30562	MGI:2443049	D230025D16Rik	0.658267
MGI:3041242	Sema3g	1.26357	MGI:1315215	Dhrs3	0.723294
MGI:101784	Nes	1.40744	MGI:1346335	Tekt2	0.808912
MGI:96677	Kit	1.24029	MGI:2685726	Pitpnm3	0.753258
MGI:88467	Col1a1	1.28548	MGI:1920795	1700094D03Rik	0.70505
MGI:1346031	Tshz1	1.16755	MGI:2153480	Atp6v0a4	0.340114
MGI:1890648	Fignl1	1.34734	MGI:105383	Il18r1	0.718583
MGI:1918049	Cep192	1.16799	MGI:2444691	Tfcp2l1	0.625006
MGI:2384982	Cdca7l	1.29417	MGI:1194898	Ppl	0.625155
MGI:1918335	Arhgap19	1.22799	MGI:102720	Ednrb	0.727939
MGI:1860440	Bace2	1.20773	MGI:108074	Sptlc2	0.798504
MGI:1927222	Diap3	1.22752	MGI:1927237	Cgn	0.769069
MGI:97143	Marcksl1	1.37359	MGI:1347354	Homer2	0.799019
MGI:1098566	Gypc	1.1939	MGI:107744	Dnah6	0.753378
MGI:1914058	9030624G23Rik	1.32789	MGI:106598	Myo5b	0.80701
MGI:102889	Vcan	1.43672	MGI:1915982	Lrrc16a	0.751076
MGI:1353635	Lmcd1	1.22883	MGI:1861728	Wwp1	0.775571
MGI:107823	Ctsk	1.30702	MGI:2138828	Eps8l2	0.71868
MGI:95922	H2-DMb1	1.42783	MGI:101769	Mcl1	0.806875
MGI:1346526	Psmb9	1.51584	MGI:104850	Cd55	0.725703
MGI:95904	H2-K1	1.67672	MGI:107422	Hspa4l	0.760451
MGI:96186	Hoxb5	1.21357	MGI:1920551	Ttc29	0.789253
MGI:1889205	Cpq	1.23599	MGI:106686	Pon3	0.743772
MGI:2141625	Nup205	1.2606	MGI:1926134	Zdhhc3	0.732037
MGI:88075	Arsb	1.20897	MGI:2137617	Tinagl1	0.55075
MGI:894697	Rad54l	1.25868	MGI:105102	Gpx3	0.412312
MGI:3041225	Shisa3	1.24906	MGI:1917604	Secisbp2l	0.69329
MGI:3665441	Tvp23a	1.21263	MGI:1201780	Atp6v1a	0.798691
MGI:1921763	Neto2	1.21186	MGI:1338033	Spint1	0.712356
MGI:2140113	Hist2h4	1.28919	MGI:1346318	Klf6	0.680563
MGI:1916047	Pdgfrl	1.26404	MGI:108395	Vnn1	0.545073
MGI:1315205	Slit2	1.35474	MGI:1916199	1500012F01Rik	0.746809
MGI:1919641	Cdkn3	1.17924	MGI:1201679	Cxadr	0.772515
MGI:1338035	Itgb8	1.14788	MGI:1916025	Atp6v1c2	0.748828
MGI:2448322	Hist1h3d	1.23874	MGI:96693	Krt19	0.583222
MGI:1889277	Astn2	1.21021	MGI:1354381	Tmprss2	0.747095
MGI:1916469	Ddah1	1.40273	MGI:1923930	5330417C22Rik	0.765357
MGI:87909	Acta2	1.28497	MGI:96692	Krt18	0.558494
MGI:2148066	Slc38a5	1.26978	MGI:2685387	Atp13a3	0.742743
MGI:2444049	P4ha3	1.39241	MGI:107571	Cav2	0.75413
MGI:96777	Lgals1	1.39267	MGI:1858203	Rab25	0.738124
MGI:97342	Nid1	1.22704	MGI:1916730	Ttc9	0.730101
MGI:101783	Plk4	1.23121	MGI:1202395	Mmp8	0.668871
MGI:106018	St8sia4	1.3033	MGI:102963	Inmt	0.323722
MGI:88407	Ckb	1.35189	MGI:1316732	Clca1	0.674371
MGI:87921	Adh1	1.26292	MGI:2389007	Hydin	0.812889
MGI:2444583	Abi3bp	1.28928	MGI:2142610	Snx25	0.721208
MGI:2155399	Polq	1.21726	MGI:1916704	Clic3	0.683389
MGI:2670972	Frem1	1.32955	MGI:2679007	Elmo3	0.809301
MGI:109610	Enc1	1.33136	MGI:2149821	Hsd17b11	0.750468
MGI:2448295	Hist1h2ah	1.37336	MGI:1341297	Dapk2	0.764045
MGI:2685830	Nsl1	1.20564	MGI:1342284	Slc34a2	0.752226
MGI:2444826	Vash2	1.19057	MGI:1101781	Elf3	0.765562
MGI:2448425	Hist1h4f	1.51964	MGI:1921405	Errfi1	0.569031
MGI:1202890	Angpt2	1.32916	MGI:894320	Prdx6	0.742005
MGI:1930780	Myh10	1.21599	MGI:1352757	Iqgap1	0.787535
MGI:1277171	Dcx	1.15337	MGI:1859778	Hif3a	0.525558
MGI:1341823	Fanca	1.18222	MGI:2146559	AU021092	0.683367
MGI:1933744	Cenpq	1.20691	MGI:97602	Prkcz	0.837563
MGI:2384875	Cdk5rap2	1.2047	MGI:101863	Aldoc	0.713348
MGI:2448383	Hist1h2bf	1.39236	MGI:1289326	Gpn3	0.776554
MGI:1346321	Adamts5	1.23691	MGI:1922813	Dnali1	0.773403
MGI:2384790	Fanci	1.19121	MGI:94917	Dpep1	0.503883
MGI:2681107	Siglec5	1.17038	MGI:2146322	Deptor	0.760076
MGI:1355335	Tmod2	1.19809	MGI:1917912	Clic5	0.746786
MGI:2443310	Olfml2b	1.36062	MGI:2388637	Wwc1	0.755776
MGI:1338889	Uhrf1	1.43616	MGI:1339968	Cth	0.713718
MGI:1314881	Chaf1b	1.3229	MGI:1313314	Cldn4	0.615721
MGI:3045323	Trim67	1.23922	MGI:1913850	Mgst1	0.709163
MGI:95715	Gja4	1.41539	MGI:3645124	Gm5483	0.568797
MGI:3036230	Slc27a6	1.53727	MGI:1921455	Acsl3	0.766027
MGI:1914302	Ndc80	1.20442	MGI:1860040	Trim3	0.805456
MGI:1095412	Unc5c	1.36565	MGI:2669035	Tmc4	0.72752
MGI:2388283	Glb1l2	1.27789	MGI:104754	Sik1	0.491426
MGI:107557	Sema3c	1.46402	MGI:1917585	Reep6	0.77137
MGI:1917722	Atad2	1.32777	MGI:1861441	Rab27a	0.708464
MGI:107716	Myo10	1.28911	MGI:2684972	Fhdc1	0.762844
MGI:96603	Itga4	1.27755	MGI:1916948	Slc52a3	0.775379
MGI:2685821	Hjurp	1.3582	MGI:894695	Galnt3	0.777667
MGI:104537	Brca1	1.2573	MGI:1201374	Anxa8	0.722544
MGI:88250	Cald1	1.26395	MGI:1916523	Mettl7a1	0.711246
MGI:1920018	Topbp1	1.22491	MGI:2685362	Fam83b	0.783911
MGI:2443629	9930013L23Rik	1.31719	MGI:107927	Rock1	0.807772
MGI:1274781	Robo1	1.23851	MGI:1097711	Degs1	0.810691
MGI:105313	Cit	1.19532	MGI:1914125	Swt1	0.658716
MGI:2444314	Fat3	1.36371	MGI:2146009	Dennd3	0.77807
MGI:98753	Timp2	1.28055	MGI:1915667	Ccdc17	0.682232
MGI:1924093	Dtl	1.34234	MGI:1270859	Cry2	0.752741
MGI:1203517	Birc5	1.26314	MGI:105304	Il6ra	0.65584
MGI:1344332	Wif1	1.41894	MGI:1923927	Pcmtd2	0.749713
MGI:1196391	Pole	1.31513	MGI:1194909	Rsph1	0.820632
MGI:99660	Pola1	1.31174	MGI:104665	Soat1	0.748875
MGI:1349165	Sdc2	1.33222	MGI:1917363	Odf3b	0.798849
MGI:1352755	Gtse1	1.21145	MGI:97829	Pygl	0.669186
MGI:1341110	Adcy8	1.32415	MGI:96441	Igfbp6	0.522096
MGI:1914287	Pmf1	1.19381	MGI:2387599	Prr15l	0.743098
MGI:2445153	Clspn	1.27667	MGI:98730	Tgm1	0.682163
MGI:88269	Car2	1.28852	MGI:1347472	Foxa1	0.810507
MGI:1313288	Incenp	1.27436	MGI:1335079	Elf5	0.711215
MGI:2143897	Fam26e	1.19743	MGI:98364	Sox2	0.801746
MGI:1926259	Iigp1	1.83913	MGI:103159	Cish	0.761473
MGI:1919054	Mtfr2	1.18949	MGI:1926283	Tmem8	0.835191
MGI:107739	Casp3	1.2053	MGI:96705	Krt8	0.572164
MGI:105378	Adam12	1.37582	MGI:96817	Lox	0.564869
MGI:1914199	Trim59	1.30067	MGI:95851	Gsn	0.713535
MGI:1890564	Rcan1	1.30062	MGI:1922715	Dynlrb2	0.702549
MGI:96495	Igkc	1.57096	MGI:1346056	Ctage5	0.755343
MGI:102688	H2afx	1.41977	MGI:894649	Ppfibp2	0.816024
MGI:96448	Ighm	1.57989	MGI:1202715	Tcf21	0.739949
MGI:101845	Mcm3	1.44862	MGI:94900	Dlk1	0.336102
MGI:2143057	Pif1	1.15338	MGI:1351326	Nrk	0.742135
MGI:1915862	Ube2c	1.33854	MGI:1316648	Ahnak	0.824976
MGI:107379	Gstt1	1.33128	MGI:1889209	Gipc2	0.682393
MGI:2445121	Slfn9	1.26268	MGI:106196	Stfa3	0.538067
MGI:99254	Etv1	1.35058	MGI:2144095	Sec14l4	0.767241
MGI:2679264	Olfml1	1.25072	MGI:1914797	Slc39a8	0.745537
MGI:2147897	Cenpi	1.27357	MGI:97171	Mt1	0.609216
MGI:2448407	Hist1h2bn	1.4735	MGI:2177191	Bspry	0.779016
MGI:98366	Sox4	1.4302	MGI:1918483	Enkur	0.804801
MGI:3605801	Angptl7	1.31871	MGI:1929988	Klf15	0.61347
MGI:2146149	Egflam	1.32746	MGI:1915409	Stx19	0.80277
MGI:1354952	Dkk3	1.31924	MGI:107776	Gadd45b	0.703616
MGI:1920423	Pcdh18	1.36108	MGI:1860093	Stard10	0.79089
MGI:2387661	Sema6d	1.23669	MGI:1915971	1110032A03Rik	0.794119
MGI:2142989	Ncapd3	1.26632	MGI:1919100	Clip4	0.66869
MGI:3051647	Pappa2	1.40661	MGI:95523	Fgfr2	0.812265
MGI:1917895	Oip5	1.20064	MGI:1916348	Tmem176b	0.804708
MGI:104716	Nnat	1.33676	MGI:95755	Slc2a1	0.591855
MGI:2448480	Fancd2	1.24277	MGI:1349396	Acot1	0.621679
MGI:1925911	C1qtnf7	1.31991	MGI:1918730	8430408G22Rik	0.569866
MGI:1194498	Gsg2	1.17028	MGI:1859285	Cldn7	0.768715
MGI:97812	Ptprd	1.29558	MGI:1934852	Acox2	0.837815
MGI:1931838	Dbn1	1.32533	MGI:2655401	Scgb1c1	0.790895
MGI:103011	Ccr7	1.23597	MGI:104684	Eps8	0.812527
MGI:99782	Nt5e	1.48789	MGI:1919110	Wdr16	0.780986
MGI:2682940	Gxylt2	1.30205	MGI:3819533	Snord42b	0.795887
MGI:103300	Rbl1	1.32706	MGI:97283	Ncf1	0.787114
MGI:1926562	Gucy1a3	1.20993	MGI:1921935	4930451C15Rik	0.817853
MGI:98181	Rrm2	1.56292	MGI:2675603	Trpm6	0.799319
MGI:1924994	Bora	1.25891	MGI:1923437	Adhfe1	0.766038
MGI:2137913	Loxl2	1.34749	MGI:88459	Col6a1	0.786121
MGI:1924470	Tmem200a	1.24718	MGI:1354735	Atp11a	0.777587
MGI:2441950	Lphn3	1.28429	MGI:1891916	Plag1	0.812426
MGI:1196326	Ncald	1.24325	MGI:99480	Cebpa	0.714195
MGI:2448377	Hist1h2bb	1.43207	MGI:107285	Ctsh	0.58282
MGI:1915264	Zwilch	1.32753	MGI:2135756	Hspb8	0.666766
MGI:88490	Crabp1	1.80593	MGI:87989	Alas1	0.760331
MGI:1914879	Spc24	1.2719	MGI:107588	Gjb6	0.759361
MGI:2448399	Hist1h2bk	1.96418	MGI:1915963	Ifitm1	0.513157
MGI:99444	Nrep	1.35902	MGI:1914675	Eps8l1	0.744451
MGI:1914179	Asf1b	1.50921	MGI:1917816	Abhd17b	0.772885
MGI:1098693	Tet1	1.23813	MGI:1351469	Plekhb1	0.803014
MGI:102468	Pla2r1	1.22061	MGI:2685715	Heca	0.763532
MGI:97610	Plat	1.34973	MGI:2387863	Zmynd10	0.843757
MGI:1858306	Srpx	1.32147	MGI:1915077	Aldh6a1	0.691655
MGI:1337004	Loxl3	1.27517	MGI:894286	P4ha2	0.819228
MGI:1349453	Vsnl1	1.48669	MGI:1921809	Elovl7	0.77041
MGI:2448306	Hist1h2ab	1.55292	MGI:1298382	Plp2	0.744402
MGI:98763	Tk1	1.29648	MGI:1100842	Gfra1	0.815509
MGI:2448300	Hist1h2an	1.46864	MGI:1201785	Fxyd5	0.777768
MGI:1923036	Ckap5	1.21882	MGI:1918962	Dram1	0.772785
MGI:2675669	Nusap1	1.35517	MGI:96211	Hp	0.732973
MGI:102551	Ccnf	1.40565	MGI:5456174	Gm26397	0.79194
MGI:1917704	Cenpl	1.24545	MGI:1925213	Hook1	0.772251
MGI:1915146	Ccdc80	1.31634	MGI:2156378	Rnf39	0.774856
MGI:2446977	Kif18a	1.25042	MGI:3041177	Taok3	0.78685
MGI:1355323	Slc7a8	1.38172	MGI:2384918	Tspan8	0.765146
MGI:1916966	Trip13	1.37438	MGI:2148019	Jade3	0.791753
MGI:1919244	Cnn3	1.29301	MGI:1913340	Ypel3	0.77316
MGI:1913425	Mustn1	1.54877	MGI:88348	Cd9	0.770638
MGI:1332240	Heph	1.25057	MGI:107464	Plcb4	0.791383
MGI:1922011	Mxra8	1.28058	MGI:1349162	Sdc1	0.769542
MGI:2442836	Brip1	1.26152	MGI:95485	Fasn	0.745785
MGI:1196274	Cdca8	1.32671	MGI:1921663	Tc2n	0.708175
MGI:1916151	Gpr126	1.31878	MGI:1277096	Ptp4a1	0.697017
MGI:1334444	Zfpm2	1.18548	MGI:1306826	Sema7a	0.702148
MGI:3641930	Gm16494	1.36273	MGI:2443755	Rasgef1b	0.56052
MGI:894278	Bche	1.35768	MGI:88057	Apoe	0.623837
MGI:2444496	Prr11	1.27538	MGI:109380	Il10rb	0.811021
MGI:99217	Cdh11	1.31933	MGI:2159210	Tiparp	0.753876
MGI:2448350	Hist1h3i	1.63635	MGI:3645893	Gm6166	0.679329
MGI:1915276	2810417H13Rik	1.61878	MGI:97612	Plaur	0.702842
MGI:103029	Mdk-ps1	1.37168	MGI:1915291	Mid1ip1	0.796732
MGI:2447063	Tenm4	1.22962	MGI:1918195	Mmrn1	0.718885
MGI:1343044	Rbmx	1.29927	MGI:893592	Ager	0.826932
MGI:3641865	Gm10357	1.41105	MGI:2444110	Sgms1	0.773771
MGI:96795	Lmnb1	1.49705	MGI:2148050	C77370	0.827761
MGI:2448388	Hist1h2bj	1.67314	MGI:1913760	Rnf181	0.803964
MGI:1194921	Ttk	1.39023	MGI:107164	Ppp3ca	0.831877
MGI:107168	Aurkb	1.4975	MGI:1890216	Slc6a14	0.667092
MGI:109359	Nek2	1.32376	MGI:1197007	Birc3	0.81506
MGI:1926321	Postn	1.39264	MGI:1922806	1700026D08Rik	0.817774
MGI:1922567	Parpbp	1.35685	MGI:99403	Adora2b	0.792063
MGI:108037	Figf	1.35976	MGI:2447167	Cmtm8	0.775564
MGI:1915099	Cdca5	1.34249	MGI:1913520	Fam134b	0.781077
MGI:1890110	Robo2	1.41779	MGI:1929938	Perp	0.657863
MGI:104902	Gpc4	1.3324	MGI:97565	Pgm2	0.764298
MGI:88351	Cdk1	1.50171	MGI:2151071	C1galt1	0.823959
MGI:1913586	Cenpp	1.19317	MGI:2384914	Appl2	0.773999
MGI:1921436	Ccdc3	1.47605	MGI:98935	Vldlr	0.800337
MGI:3036286	Arhgef39	1.25764	MGI:1098726	Emp2	0.802109
MGI:1914399	Nkain1	1.30104	MGI:1347050	Aldh1a7	0.751248
MGI:103180	Tcf19	1.47092	MGI:1916014	Cdhr3	0.824176
MGI:2676551	Plekhg1	1.2441	MGI:3590652	Txlng	0.783752
MGI:1913820	Cenpm	1.35491	MGI:2385129	Lrrc26	0.64573
MGI:1923714	Casc5	1.49841	MGI:5454271	Gm24494	0.738219
MGI:1922038	E2f8	1.37244	MGI:1922850	Calml4	0.834637
MGI:1921291	4632434I11Rik	1.32091	MGI:1100508	Kcnj8	0.766907
MGI:1098767	Sgol2	1.36078	MGI:1337006	Hapln1	0.632427
MGI:3028579	Rasgrp3	1.33711	MGI:102709	Cav1	0.802052
MGI:95923	H2-DMb2	1.27514	MGI:1929881	Smoc2	0.631443
MGI:103307	Cacnb3	1.35312	MGI:1922679	Fam183b	0.827434
MGI:96432	Igf1	1.41949	MGI:2385897	Tmem184a	0.806908
MGI:88025	Ank2	1.26962	MGI:96689	Krt15	0.786865
MGI:1347487	Foxm1	1.43302	MGI:108384	Btg2	0.548436
MGI:88468	Col1a2	1.35319	MGI:3643597	Gm8213	0.764166
MGI:2448387	Hist1h2bh	1.336	MGI:2685720	Acss3	0.687673
MGI:95489	Fbn1	1.30733	MGI:2182619	Lgi3	0.742203
MGI:1098258	Kif15	1.41286	MGI:1923777	Il34	0.80017
MGI:2448404	Hist1h2bm	1.54632	MGI:2661416	Snx13	0.841993
MGI:98958	Wnt5a	1.6118	MGI:104744	Kcnj2	0.751222
MGI:1915905	Fndc1	1.51811	MGI:93830	Adipor2	0.804149
MGI:101780	Serpine2	1.40116	MGI:107448	Lyst	0.82715
MGI:1931523	Hist1h1a	1.61341	MGI:1923799	Cecr2	0.73624
MGI:1341163	Tacc3	1.42858	MGI:2664999	Tpt1-ps5	0.714748
MGI:1923724	Spon2	1.78661	MGI:2137698	Ugt1a6a	0.718248
MGI:2448309	Hist1h2af	1.58176	MGI:1923000	Slc10a6	0.524299
MGI:2146156	Espl1	1.28942	MGI:1341793	Pbx2	0.829618
MGI:1891396	Kirrel	1.29727	MGI:1196284	Tsc22d3	0.647341
MGI:1927470	Spag5	1.40924	MGI:1345092	Pglyrp1	0.735727
MGI:3028499	Adamtsl3	1.28393	MGI:1926002	Csgalnact2	0.830574
MGI:1919405	Cenpn	1.43812	MGI:88381	F3	0.651021
MGI:1338802	Shcbp1	1.48194	MGI:104695	Scnn1g	0.72429
MGI:2145099	Mis18bp1	1.41615	MGI:2386846	Abca8a	0.788888
MGI:1352474	Tnfrsf19	1.43146	MGI:1859631	Pdgfc	0.817713
MGI:1916433	C1qtnf2	1.34886	MGI:1916524	Ctdspl	0.846573
MGI:3648068	Gm6091	1.48734	MGI:1891827	Gde1	0.743566
MGI:106067	Smc2	1.4839	MGI:2148705	Foxp2	0.844153
MGI:2651499	Pde5a	1.46676	MGI:1923035	Klhl24	0.749865
MGI:2446979	Kif18b	1.38005	MGI:1933113	Gpr146	0.845948
MGI:2183453	Dlgap5	1.46482	MGI:99440	Cd33	0.804757
MGI:2448326	Hist1h3e	1.71151	MGI:2443921	Irf2bp2	0.782956
MGI:95901	H2-Eb1	1.90373	MGI:2448587	Ccdc153	0.751231
MGI:1913099	Psrc1	1.2577	MGI:96837	Ltf	0.716038
MGI:88302	Ccnb1	1.67283	MGI:1341859	Gstz1	0.782303
MGI:104667	Hmmr	1.3763	MGI:1921356	Dcaf6	0.82539
MGI:1861461	Hist1h1b	1.7615	MGI:1338788	Pex11a	0.82642
MGI:1346870	Map2k6	1.27948	MGI:102695	Ptprf	0.78994
MGI:88329	Cd34	1.3311	MGI:96969	Met	0.798408
MGI:1100510	Bub1	1.61388	MGI:2135625	Glrx	0.749266
MGI:1915277	Tmem178	1.39464	MGI:2138319	Trp53bp2	0.822697
MGI:101922	Tnc	1.80866	MGI:1918320	Mbip	0.767551
MGI:2384588	Neil3	1.46856	MGI:106280	Yipf3	0.809517
MGI:2444576	Kif20b	1.40519	MGI:1346864	Mapk13	0.827536
MGI:1928392	Dpt	1.6108	MGI:1914701	Pkp2	0.770173
MGI:2673709	Kntc1	1.401	MGI:106510	Lurap1l	0.807003
MGI:2443149	Gen1	1.36152	MGI:102683	Grb7	0.800876
MGI:109233	Kif22	1.47453	MGI:99441	Ckmt1	0.760247
MGI:98726	Tgfb2	1.37358	MGI:109341	Eya2	0.810608
MGI:1923294	Ncapg2	1.5466	MGI:3647234	Rps15-ps2	0.765223
MGI:1927070	Dusp10	1.4256	MGI:2677849	Ccbl2	0.847732
MGI:103574	Amph	1.42645	MGI:1330819	Osmr	0.762889
MGI:2443787	Rnf152	1.38419	MGI:3589109	Sgpp2	0.761459
MGI:5313075	Gm20628	1.70685	MGI:109518	Sftpa1	0.79735
MGI:1919665	Sgol1	1.33199	MGI:3617848	Sec14l3	0.743944
MGI:2665139	Rerg	1.35401	MGI:1890410	Acss2	0.699348
MGI:96949	Mdk	1.7309	MGI:2139354	Arfgef2	0.810717
MGI:107489	Phex	1.67499	MGI:1349721	Tob1	0.771847
MGI:3643092	Neurl1b	1.31791	MGI:96765	Ldlr	0.688575
MGI:1919711	Prcp	1.47614	MGI:104528	S100g	0.589877
MGI:1915548	Ncapd2	1.56863	MGI:104783	Atxn1	0.817486
MGI:108389	Kif4	1.4912	MGI:1098776	Lbp	0.78041
MGI:1913692	Spc25	1.58189	MGI:1890457	Slc15a2	0.701705
MGI:102643	Myh11	1.55151	MGI:1858500	Diap2	0.821364
MGI:1289298	Knstrn	1.49703	MGI:107815	Pfkfb2	0.758847
MGI:2448297	Hist1h2ak	1.53374	MGI:99951	Mafk	0.767914
MGI:2181363	Prokr2	1.69649	MGI:104809	Pls1	0.787318
MGI:1315198	Cdca3	1.41352	MGI:1914188	Sh3d21	0.757985
MGI:95281	Ect2	1.49704	MGI:1915896	Nadk2	0.830576
MGI:2664902	Mark1	1.34018	MGI:2664997	Tpt1-ps3	0.777705
MGI:1919238	Esco2	1.35415	MGI:1330284	Slc16a7	0.818213
MGI:1333889	Bub1b	1.60153	MGI:104737	Cdkn2b	0.775568
MGI:1917716	Ckap2l	1.42029	MGI:1914719	Abhd5	0.817196
MGI:1860374	Mad2l1	1.62069	MGI:2448565	Rasef	0.854551
MGI:2181621	Aard	1.49406	MGI:1927168	Dusp14	0.811984
MGI:1919787	Cdca2	1.38498	MGI:3651005	Gm13436	0.825949
MGI:1347479	Foxf2	1.49748	MGI:1315192	Lrrc23	0.81546
MGI:1917754	Galnt16	1.49012	MGI:1338031	Spint2	0.818527
MGI:1859274	Pdlim3	1.78695	MGI:1913308	Tmem176a	0.78149
MGI:1914371	Mastl	1.46979	MGI:5504037	Gm26922	0.627364
MGI:88235	C7	1.73369	MGI:1921701	Pgs1	0.796576
MGI:96079	Hgf	1.39994	MGI:1920774	1700088E04Rik	0.822246
MGI:96599	Itga1	1.47961	MGI:3505790	Fcho2	0.817113
MGI:1923381	Depdc1a	1.46498	MGI:104978	Cyp7b1	0.839633
MGI:3041235	Ska3	1.48439	MGI:1921377	Krt80	0.786882
MGI:98790	Top2a	1.88621	MGI:104741	Nfkbia	0.699594
MGI:1306799	D17H6S56E-5	1.59167	MGI:1926217	Rnase4	0.763832
MGI:98738	Thbs2	1.58175	MGI:103576	Ccl11	0.732982
MGI:2685177	Megf10	1.30482	MGI:1890357	Igf2bp1	0.882463
MGI:1930197	Ncapg	1.57622	MGI:107200	Cbr2	0.792606
MGI:2444300	Arhgap11a	1.58646	MGI:2442082	Tmem30b	0.800801
MGI:1921054	Kif2c	1.58832	MGI:1336186	Agpat3	0.817328
MGI:87963	Agt	1.71829	MGI:103562	Hsd11b1	0.665532
MGI:97621	Plk1	1.66137	MGI:1340024	Aldh1l1	0.798983
MGI:98727	Tgfb3	1.48764	MGI:2443191	Nceh1	0.786522
MGI:88350	Cdc25c	1.40446	MGI:1919683	Rab38	0.827563
MGI:1349423	Racgap1	1.76956	MGI:109618	Atp6v1b2	0.813203
MGI:1919369	Tpx2	1.6887	MGI:2685813	Fam189a2	0.733555
MGI:2444777	Ncaph	1.42558	MGI:104696	Scnn1b	0.714966
MGI:894678	Aurka	1.48658	MGI:1922722	1700009P17Rik	0.856342
MGI:1347002	Angptl2	1.56126	MGI:1289160	Mpzl2	0.683211
MGI:1289156	Pbk	1.72683	MGI:99612	Epha3	0.784833
MGI:1914227	Nuf2	1.71249	MGI:98754	Timp3	0.691944
MGI:2146335	C330027C09Rik	1.60428	MGI:2676556	Akap13	0.811956
MGI:1934569	Cpxm1	1.58476	MGI:1916289	Insig1	0.665943
MGI:1921357	Cep55	1.53154	MGI:1921395	F13a1	0.729977
MGI:1923481	Igsf10	1.54	MGI:3036264	Syde2	0.807012
MGI:1919069	Kif23	1.64243	MGI:2136348	Lyve1	0.687916
MGI:1916788	Antxr1	1.47647	MGI:1920249	Insig2	0.805332
MGI:1858961	Prc1	1.83743	MGI:107187	Bcl6	0.802336
MGI:107477	Stil	1.41601	MGI:88227	C3	0.746589
MGI:108069	Ccna2	1.83466	MGI:2442313	Lrrc1	0.813978
MGI:106924	Melk	1.52488	MGI:1098283	Per1	0.547034
MGI:88453	Col3a1	1.44026	MGI:1921590	Ahcyl2	0.786267
MGI:1098231	Kif11	1.69314	MGI:107381	Epha1	0.846606
MGI:106035	Mki67	1.76198	MGI:1194899	Inpp5k	0.802994
MGI:1920174	Anln	1.73724	MGI:95705	B4galt1	0.83907
MGI:1915674	Chn1	1.43391	MGI:3580629	Ugt1a6b	0.794759
MGI:1918780	Gas2l3	1.5638	MGI:3647611	Gm16439	0.707559
MGI:1098230	Cenpe	1.50992	MGI:1276109	Cldn1	0.819822
MGI:1890127	Plxnc1	1.55003	MGI:106387	D10Bwg1379e	0.738032
MGI:88311	Ccnb2	1.76262	MGI:97744	Por	0.781393
MGI:1917695	Cd248	1.4641	MGI:3512453	A4galt	0.818921
MGI:1918001	6330403K07Rik	1.65922	MGI:3052471	Slc2a12	0.822487
MGI:3028642	Iqgap3	1.49407	MGI:1197515	Irx1	0.750144
MGI:1925983	Troap	1.32606	MGI:96438	Igfbp3	0.527352
MGI:1931797	Ckap2	1.47241	MGI:88373	Cebpb	0.803029
MGI:1924434	Fam64a	1.70791	MGI:109232	Npas2	0.800099
MGI:1201682	Kif20a	1.69466	MGI:1919308	Igsf5	0.786647
MGI:1349645	Islr	1.6113	MGI:1919410	Tmem163	0.824089
MGI:1313302	Cenpf	1.56822	MGI:1100819	Aff1	0.823205
MGI:1334448	Aspm	1.5989	MGI:103222	Zbtb16	0.392578
MGI:88375	Cenpa	1.58973	MGI:1931307	Slc19a3	0.838479
MGI:99502	Ltbp2	2.02116	MGI:1914220	Ssbp2	0.834908
MGI:101948	Wnt11	1.51358	MGI:1855691	Map3k6	0.668611
MGI:1918794	Arhgap42	1.4315	MGI:107741	Pvr	0.773926
MGI:1345277	Ddr2	1.6236	MGI:1924772	Tmem213	0.668357
MGI:2155705	P2ry14	1.95056	MGI:1916782	Hopx	0.767763
MGI:2685047	Hmcn1	1.78429	MGI:1924378	Crebrf	0.728447
MGI:97370	Enpp1	1.77655	MGI:1920537	1700040L02Rik	0.835988
MGI:1919128	Fam83d	1.41771	MGI:2447362	Slc24a4	0.798203
MGI:1859866	Cdc20	1.54338	MGI:1924840	Chst15	0.757627
MGI:103070	H2-Ab1	3.15516	MGI:2145458	Akr1c14	0.670898
MGI:2137237	Fam129a	1.67413	MGI:1860118	Sema3d	0.793136
MGI:96437	Igfbp2	2.27964	MGI:1196990	Cd200	0.836741
MGI:2444800	Prss35	2.37522	MGI:101805	Gys1	0.795829
MGI:104750	Nrcam	1.67392	MGI:1349216	Abcd3	0.822405
MGI:1929076	Htra1	2.36089	MGI:1917969	Hmha1	0.821794
MGI:105388	Cdkn2c	1.84812	MGI:97844	Rab3d	0.835082
MGI:95895	H2-Aa	2.37508	MGI:96648	Jund	0.781652
MGI:2443198	Slitrk6	1.95736	MGI:104670	Fkbp5	0.563585
MGI:96534	Cd74	2.49267	MGI:107362	Stxbp3a	0.801415
MGI:1922990	Egfem1	2.56118	MGI:1926142	Crispld2	0.693644
			MGI:2137648	Ifi30	0.789263
			MGI:2384850	Pdlim2	0.814987
			MGI:2443575	Mettl20	0.815187
			MGI:892970	Mal	0.706587
			MGI:1338881	St14	0.817141
			MGI:1916120	Ak8	0.852904
			MGI:1922818	Capsl	0.847861
			MGI:97463	P4ha1	0.779618
			MGI:1314882	Hipk3	0.850039
			MGI:1349164	Sdc4	0.789796
			MGI:1918521	Gca	0.823287
			MGI:1919727	Tmem87b	0.83466
			MGI:1920974	Mcee	0.829747
			MGI:106321	Dock9	0.844966
			MGI:894668	Serpinb9b	0.666842
			MGI:1921409	Acbd5	0.833637
			MGI:1097712	Npc1	0.715231
			MGI:102755	Zbtb7b	0.836915
			MGI:103178	Vegfa	0.802445
			MGI:90168	Dcaf11	0.809943
			MGI:2442784	Slco4c1	0.746185
			MGI:88271	Cat	0.827367
			MGI:2158641	Cyp4f13	0.864265
			MGI:1915821	1110002L01Rik	0.832001
			MGI:2385297	Tpcn2	0.774691
			MGI:2445062	Mum1l1	0.753202
			MGI:2387100	Dusp7	0.793779
			MGI:1347004	Mapkbp1	0.809578
			MGI:107558	Sema3a	0.78626
			MGI:1923484	Magi3	0.847344
			MGI:1931295	Rab27b	0.861667
			MGI:1917362	Sft2d2	0.786341
			MGI:3819515	Snord104	0.803387
			MGI:2143558	Chchd10	0.807575
			MGI:1353452	Aldh3a2	0.861043
			MGI:1924375	Il33	0.723483
			MGI:1349215	Abcd1	0.818037
			MGI:99852	Runx1	0.837452
			MGI:101790	Fabp5	0.749987
			MGI:1919277	Slc39a4	0.692036
			MGI:2685751	Tmem171	0.810984
			MGI:1930005	Trem1	0.811845
			MGI:1915393	Herpud2	0.844986
			MGI:1891341	Lpin2	0.758356
			MGI:3045722	Tmem255a	0.813361
			MGI:2444966	Tecrl	0.710604
			MGI:1336882	Vamp8	0.749108
			MGI:1931437	Smpdl3a	0.833691
			MGI:1343087	Pdk2	0.795002
			MGI:105983	Ngp	0.678167
			MGI:98352	Sod2	0.826188
			MGI:97373	Npr3	0.665991
			MGI:96778	Lgals3	0.719826
			MGI:1917673	Tspan15	0.777429
			MGI:2443297	Ccnj	0.861743
			MGI:2442473	Rhbdf2	0.841023
			MGI:1202394	Gif	0.760644
			MGI:2443264	9330182L06Rik	0.765427
			MGI:1927638	Dnaja4	0.866608
			MGI:2385825	Plekhb2	0.796288
			MGI:103573	Cebpd	0.543136
			MGI:5452896	Gm23119	0.741861
			MGI:1100870	Gcnt2	0.872071
			MGI:107728	Myo1d	0.848047
			MGI:1919124	2310007B03Rik	0.763565
			MGI:5453285	Gm23508	0.645436
			MGI:1913310	Cystm1	0.855063
			MGI:2444594	Slc26a9	0.758443
			MGI:98731	Tgm2	0.787102
			MGI:1098718	Tmem38b	0.788754
			MGI:2385155	Btbd3	0.824513
			MGI:1922925	Mfsd6	0.852559
			MGI:2385644	Ms4a6c	0.776533
			MGI:1890081	Foxo3	0.718653
			MGI:1929459	Rabgef1	0.850826
			MGI:1330223	Papss2	0.835035
			MGI:96704	Krt7	0.754836
			MGI:2140300	AI464131	0.855246
			MGI:1927899	Mmp19	0.675853
			MGI:3644570	Gm8724	0.748882
			MGI:106653	Epcam	0.840816
			MGI:102858	Fosl2	0.672142
			MGI:2444343	Nbeal1	0.825802
			MGI:1890510	Atp6v0b	0.81436
			MGI:1351618	Dnajb9	0.799891
			MGI:1924100	Ago4	0.849327
			MGI:1889549	Txnip	0.747475
			MGI:2384568	Kank2	0.861114
			MGI:108388	Sephs2	0.830105
			MGI:1347345	Homer1	0.874154
			MGI:1352498	Ndrg2	0.636668
			MGI:1913382	1110008L16Rik	0.88086
			MGI:1351646	Abca7	0.868457
			MGI:1916910	Tmbim1	0.783969
			MGI:2147043	Rmdn2	0.82249
			MGI:1913540	Atp6v1g1	0.829597
			MGI:103224	Fdx1	0.800744
			MGI:2177268	Ppp1r3b	0.787518
			MGI:95891	H19	0.698194
			MGI:2145738	Fam216b	0.820924
			MGI:1918395	Scara5	0.717581
			MGI:1916924	Mif4gd	0.820743
			MGI:106034	Six4	0.867032
			MGI:1914103	Pnpla2	0.755669
			MGI:1341799	Ndrg1	0.553483
			MGI:95760	Slc6a9	0.80516
			MGI:104814	Ier3	0.727714
			MGI:95676	Gcnt1	0.8499
			MGI:1336199	Ppp1r13b	0.858282
			MGI:1915050	Dgat2	0.788657
			MGI:2143526	Gstt3	0.854884
			MGI:105045	Serpina3n	0.361057
			MGI:1913416	S100a14	0.689875
			MGI:1916051	Elovl5	0.796088
			MGI:2442184	Flcn	0.804438
			MGI:1289192	Fbxo36	0.849316
			MGI:1098259	Capg	0.785945
			MGI:1333753	Pdcd6ip	0.857634
			MGI:103225	Cyp4b1	0.800977
			MGI:1913670	Polr2e	0.857844
			MGI:2685214	Prrg3	0.763481
			MGI:1338947	S100a9	0.699073
			MGI:103288	Polr1c	0.843683
			MGI:1932052	Chia1	0.634779
			MGI:107505	Alox5ap	0.832451
			MGI:1889385	Crebl2	0.853591
			MGI:104533	Ccl9	0.767669
			MGI:108081	Sypl	0.866671
			MGI:2687281	Fam105a	0.768912
			MGI:700012	Ostf1	0.846844
			MGI:1918046	Zdhhc1	0.84022
			MGI:1354702	Fbxl3	0.865156
			MGI:1923258	Nabp1	0.841
			MGI:96902	Lyz1	0.810497
			MGI:1309516	Tpst2	0.844375
			MGI:103286	Atp6v0a1	0.835651
			MGI:108420	Nfe2l2	0.828323
			MGI:1915058	Tprgl	0.843647
			MGI:2444679	Tcp11l2	0.756538
			MGI:95757	Slc2a3	0.859984
			MGI:106612	Myo1c	0.839638
			MGI:2153470	Scgb3a2	0.719554
			MGI:104841	Cpox	0.851081
			MGI:109516	Sftpb	0.828616
			MGI:1194494	Hdgf	0.820425
			MGI:1355315	Tmod3	0.863351
			MGI:1923759	Plet1	0.805729
			MGI:107387	Aqp4	0.741438
			MGI:1919139	Epn3	0.80054
			MGI:109344	Eya1	0.882871
			MGI:99478	Cckar	0.814152
			MGI:1915105	Asprv1	0.586003
			MGI:1344037	Rpgr	0.874643
			MGI:1919051	Plekhf2	0.85358
			MGI:1923195	Tmem56	0.830183
			MGI:1917384	2210011C24Rik	0.814942
			MGI:1922814	Rsph9	0.855109
			MGI:1355324	Grb14	0.885042
			MGI:1861606	Tacstd2	0.786357
			MGI:2384812	Lpcat1	0.818435
			MGI:1278319	Fpr2	0.770894
			MGI:87938	Adrb2	0.764658
			MGI:88053	Apoc1	0.798185
			MGI:1333856	Klf9	0.763454
			MGI:96433	Igf1r	0.841313
			MGI:96545	Il1r1	0.84445
			MGI:1917723	Rapgef4	0.820686
			MGI:1346876	Map3k5	0.854073
			MGI:104295	Sla	0.822914
			MGI:96819	Anxa1	0.767679
			MGI:1925044	Adamtsl2	0.632504
			MGI:1923811	Snx7	0.831513
			MGI:96910	Maff	0.700349
			MGI:1346500	Igbp1	0.859712
			MGI:1316717	Ifrd1	0.812317
			MGI:1346325	Gadd45g	0.76286
			MGI:96916	Maob	0.808877
			MGI:1934677	Pla1a	0.797902
			MGI:892014	Sfrp1	0.807137
			MGI:1917088	Smim3	0.823033
			MGI:107423	Numb	0.877136
			MGI:2686976	Ifitm6	0.74774
			MGI:1333864	Mrpl14	0.827648
			MGI:2667763	Retnlg	0.75095
			MGI:1933165	Plagl2	0.888307
			MGI:108451	Acaca	0.839973
			MGI:3819493	Snora21	0.842455
			MGI:1100500	Flot1	0.853664
			MGI:1314872	Hipk2	0.831584
			MGI:1337131	Rev3l	0.892687
			MGI:1923392	Ppp1r14c	0.756709
			MGI:1924105	Slc17a5	0.829793
			MGI:98117	Rps15	0.851686
			MGI:104637	Tgfbr3	0.731338
			MGI:1915842	Syf2	0.853178
			MGI:2443738	BC022687	0.824342
			MGI:2155600	Myh7	0.787228
			MGI:1098551	Clk4	0.760669
			MGI:1919293	Sulf2	0.828125
			MGI:1201378	Anxa3	0.832333
			MGI:1344373	Ubl3	0.863218
			MGI:1298389	Clec4d	0.77532
			MGI:105303	Cxcr2	0.824282
			MGI:1923513	Gstk1	0.811437
			MGI:1918036	4430402I18Rik	0.871827
			MGI:2445107	Tmem245	0.86771
			MGI:2448490	Sbno2	0.856878
			MGI:2181193	Dennd2d	0.876916
			MGI:104709	Wbp2	0.873539
			MGI:1341903	Slc23a1	0.845047
			MGI:2441808	Cdc14b	0.862381
			MGI:2683547	Plch1	0.909993
			MGI:2442060	Rassf2	0.765817
			MGI:5455568	Gm25791	0.688184
			MGI:2384963	Stxbp6	0.850107
			MGI:1336155	Lss	0.832618
			MGI:2145517	B3galnt2	0.851711
			MGI:88460	Col6a2	0.830371
			MGI:2385331	Stard13	0.859405
			MGI:2442367	Slc13a4	0.737912
			MGI:98299	Shmt1	0.885768
			MGI:5454341	Gm24564	0.756814
			MGI:106582	Rfx3	0.897255
			MGI:96591	Irf2	0.854797
			MGI:88244	S100a8	0.708523
			MGI:2442910	Fam129b	0.823009
			MGI:3036247	Lmtk2	0.851915
			MGI:1921134	Zdbf2	0.84952
			MGI:109515	Sftpd	0.683296
			MGI:1914921	Rpl38	0.812735
			MGI:2140321	Pafah2	0.853222
			MGI:104629	Penk	0.718439
			MGI:104565	Cdkn1b	0.809148
			MGI:98847	Kdm3a	0.81324
			MGI:1930134	Ern1	0.869594
			MGI:1859333	Nfat5	0.859367
			MGI:1917329	Golm1	0.862275
			MGI:1891123	Kcne2	0.814311
			MGI:1289230	Pxk	0.859559
			MGI:1929618	Stard3	0.849903
			MGI:1918000	Kdsr	0.825576
			MGI:2387181	Zbtb8b	0.83117

## Sheet: ALV2vsALV3
UPREGULATED			DOWNREGULATED
MGI_ID	Symbol	FoldChange	MGI_ID	Symbol	FoldChange
MGI:1859665	Atp8b1	1.19803	MGI:95891	H19	0.424187
MGI:103034	Stat6	1.20514	MGI:1860374	Mad2l1	0.569844
MGI:1923000	Slc10a6	1.28309	MGI:3036230	Slc27a6	0.545316
MGI:1098434	Rgs5	1.27776	MGI:94900	Dlk1	0.52537
MGI:3648673	Gm5518	1.33907	MGI:96434	Igf2	0.537692
MGI:1913359	Tspan13	1.20471	MGI:1930197	Ncapg	0.633318
MGI:1915882	Myct1	1.2133	MGI:98790	Top2a	0.59339
MGI:1333831	Itln1	1.41878	MGI:1338802	Shcbp1	0.646901
MGI:1351867	Slco3a1	1.20634	MGI:1915276	2810417H13Rik	0.573334
MGI:2448556	Stard8	1.20386	MGI:1914227	Nuf2	0.627038
MGI:107848	Tubb4a	1.25699	MGI:88302	Ccnb1	0.607969
MGI:1917153	Rasip1	1.22092	MGI:88311	Ccnb2	0.627867
MGI:99571	Glp1r	1.27715	MGI:1289156	Pbk	0.634551
MGI:1316692	Igkj4	1.30163	MGI:107706	Itm2a	0.671187
MGI:2443629	9930013L23Rik	1.28843	MGI:1098231	Kif11	0.641938
MGI:1916523	Mettl7a1	1.26983	MGI:108069	Ccna2	0.61397
MGI:105088	Ntn1	1.21322	MGI:1914391	Fbxo5	0.639823
MGI:1915116	Wfdc1	1.24119	MGI:97757	Prim1	0.640233
MGI:103307	Cacnb3	1.21546	MGI:2442474	Dgkb	0.624946
MGI:1342273	Gsto1	1.29557	MGI:1100510	Bub1	0.643513
MGI:1202710	Art4	1.24145	MGI:1919369	Tpx2	0.649915
MGI:107818	Mrc2	1.2283	MGI:1921054	Kif2c	0.657748
MGI:1891228	Scel	1.25616	MGI:88588	Cyp1a1	0.310577
MGI:1345139	Spry1	1.23115	MGI:88479	Cpa3	0.60223
MGI:2443170	Ces2e	1.21675	MGI:1916604	Slc38a4	0.661729
MGI:1921590	Ahcyl2	1.23619	MGI:1920174	Anln	0.651609
MGI:103253	Cyb561	1.20969	MGI:107804	Tuba1b	0.567977
MGI:96257	Hspg2	1.24524	MGI:1100874	Plagl1	0.693564
MGI:2442746	Slc43a2	1.23644	MGI:104820	Hnrnpa1	0.687688
MGI:1915419	Ndnf	1.22581	MGI:96157	Hmgb2	0.596101
MGI:88455	Col4a2	1.22192	MGI:1338889	Uhrf1	0.649749
MGI:1922920	Ushbp1	1.21912	MGI:1100850	Capn6	0.64446
MGI:104754	Sik1	1.3944	MGI:1913692	Spc25	0.661403
MGI:1101355	Ltbp3	1.25221	MGI:1889208	Cks1b	0.665774
MGI:1914145	Pxdc1	1.25783	MGI:96968	Mest	0.620818
MGI:3045243	Ankrd44	1.21792	MGI:1916966	Trip13	0.687787
MGI:3645587	Gm5806	1.26116	MGI:106035	Mki67	0.668393
MGI:97528	Pdgfb	1.23624	MGI:1923381	Depdc1a	0.692103
MGI:1858261	Slc7a10	1.25219	MGI:87966	Agtr2	0.704497
MGI:1277150	Ldlrad4	1.22591	MGI:102482	mt-Tl1	0.625737
MGI:95762	Gm2a	1.23291	MGI:1861461	Hist1h1b	0.627661
MGI:892986	Spib	1.22268	MGI:106067	Smc2	0.689912
MGI:109322	Kcnk1	1.33364	MGI:1919069	Kif23	0.681599
MGI:2138647	Fcrla	1.22572	MGI:1890648	Fignl1	0.678099
MGI:96079	Hgf	1.22621	MGI:99612	Epha3	0.667713
MGI:1921371	Acoxl	1.25261	MGI:107168	Aurkb	0.68553
MGI:103574	Amph	1.22866	MGI:1923294	Ncapg2	0.684978
MGI:1298393	Sh3pxd2a	1.22466	MGI:1858961	Prc1	0.665024
MGI:1934569	Cpxm1	1.24462	MGI:98181	Rrm2	0.66309
MGI:104815	Ier2	1.30665	MGI:1919405	Cenpn	0.704005
MGI:2445179	Tmem184b	1.23706	MGI:2384588	Neil3	0.704042
MGI:2137513	Slc24a3	1.23612	MGI:96942	Tpsb2	0.610491
MGI:2135589	Clec2d	1.32376	MGI:98180	Rrm1	0.672007
MGI:88453	Col3a1	1.21735	MGI:2146335	C330027C09Rik	0.689795
MGI:97600	Prkch	1.23293	MGI:96013	Hat1	0.696606
MGI:1928953	Ccl24	1.37813	MGI:95281	Ect2	0.69658
MGI:97613	Plcb1	1.22445	MGI:2145099	Mis18bp1	0.702264
MGI:2138563	Sulf1	1.21922	MGI:1098230	Cenpe	0.71438
MGI:108409	Rgs4	1.28746	MGI:102889	Vcan	0.671083
MGI:1333817	Slc22a3	1.24109	MGI:3649924	Gm13237	0.647359
MGI:99912	Lama2	1.24366	MGI:1349423	Racgap1	0.675024
MGI:1859388	Dll4	1.26338	MGI:1202065	Chek1	0.700893
MGI:1919599	Dusp3	1.24937	MGI:2448399	Hist1h2bk	0.558234
MGI:893578	Scarb1	1.24149	MGI:1201682	Kif20a	0.692995
MGI:107474	Cd38	1.24579	MGI:88375	Cenpa	0.71327
MGI:105097	Efnb2	1.25194	MGI:97621	Plk1	0.685237
MGI:1858224	Chst3	1.21057	MGI:1914199	Trim59	0.732549
MGI:2157942	Cd209a	1.23123	MGI:2443149	Gen1	0.737651
MGI:95537	Ctgf	1.31278	MGI:1926259	Iigp1	0.532688
MGI:96602	Itga3	1.24976	MGI:1931523	Hist1h1a	0.668141
MGI:1932682	Cxcl16	1.24114	MGI:106924	Melk	0.712877
MGI:1919574	Plxdc1	1.21783	MGI:96940	Mcpt4	0.715491
MGI:1913945	Aspn	1.31071	MGI:1914371	Mastl	0.722219
MGI:1342287	Klf4	1.26026	MGI:1098258	Kif15	0.725603
MGI:1277980	Fgf18	1.24315	MGI:1333889	Bub1b	0.692432
MGI:107685	Plxna1	1.26402	MGI:1334448	Aspm	0.714529
MGI:96448	Ighm	1.41141	MGI:1924093	Dtl	0.711125
MGI:1918770	Grap	1.23189	MGI:1923714	Casc5	0.700997
MGI:2676970	Sipa1l2	1.23827	MGI:1341163	Tacc3	0.725129
MGI:88182	Bmp6	1.25183	MGI:106209	Hells	0.694508
MGI:1922011	Mxra8	1.24533	MGI:2146571	Rfc4	0.731276
MGI:2441670	Pbxip1	1.19884	MGI:1927222	Diap3	0.73209
MGI:1914107	Plbd1	1.3145	MGI:107477	Stil	0.733465
MGI:98223	Saa3	2.60717	MGI:103199	Mcm4	0.719739
MGI:1349453	Vsnl1	1.28367	MGI:2675669	Nusap1	0.728478
MGI:1924375	Il33	1.46048	MGI:1914179	Asf1b	0.687403
MGI:95515	Fgf1	1.24899	MGI:2448300	Hist1h2an	0.691117
MGI:1915978	Trp53inp2	1.27132	MGI:1194921	Ttk	0.729267
MGI:98534	Tcn2	1.21826	MGI:2444576	Kif20b	0.727243
MGI:104616	Ccr3	1.37911	MGI:2444300	Arhgap11a	0.696467
MGI:109505	Xlr3b	1.45178	MGI:88351	Cdk1	0.693654
MGI:95499	Fcgr2b	1.35571	MGI:3643448	Gm7931	0.706859
MGI:1196326	Ncald	1.2318	MGI:96795	Lmnb1	0.707787
MGI:1309465	Slc12a4	1.22584	MGI:3641930	Gm16494	0.744058
MGI:1917723	Rapgef4	1.2394	MGI:108389	Kif4	0.726077
MGI:97809	Ptprb	1.25543	MGI:3041235	Ska3	0.722272
MGI:4439658	Ighj4	1.32732	MGI:1917349	Smc4	0.74414
MGI:3039635	Tmem204	1.24876	MGI:1921357	Cep55	0.741648
MGI:109536	Itih4	1.44146	MGI:1929628	Rsad2	0.610371
MGI:95405	Ephx1	1.25367	MGI:109567	Wbp5	0.706579
MGI:1918954	Arhgef3	1.25112	MGI:104667	Hmmr	0.743993
MGI:4439838	Trac	1.22032	MGI:1915862	Ube2c	0.734674
MGI:2667763	Retnlg	1.78562	MGI:109233	Kif22	0.72268
MGI:95794	Lrp2	1.38249	MGI:2183453	Dlgap5	0.726101
MGI:104552	Tns1	1.25728	MGI:102483	mt-Tk	0.568585
MGI:1316689	Igkj1	1.38988	MGI:96941	Cma1	0.698081
MGI:2385228	Tmem119	1.25374	MGI:1914878	Anp32b	0.736351
MGI:3045323	Trim67	1.29381	MGI:98779	Tnnc1	0.34801
MGI:1341872	Tjp2	1.23579	MGI:1915548	Ncapd2	0.69677
MGI:109384	Atf3	1.36489	MGI:107495	Myl7	0.52599
MGI:1917188	Scrn1	1.24551	MGI:88350	Cdc25c	0.74831
MGI:1933820	Jam2	1.23369	MGI:1355295	Hmgn5	0.706025
MGI:108384	Btg2	1.37873	MGI:1927470	Spag5	0.741658
MGI:1338859	P2rx4	1.26694	MGI:1921761	Lrrc17	0.738074
MGI:88456	Col4a5	1.25528	MGI:3641865	Gm10357	0.738102
MGI:2385331	Stard13	1.24958	MGI:1921291	4632434I11Rik	0.752982
MGI:1918876	Gimap6	1.25021	MGI:1919238	Esco2	0.768932
MGI:1921642	Specc1l	1.24666	MGI:1922038	E2f8	0.749544
MGI:1202890	Angpt2	1.28689	MGI:1917716	Ckap2l	0.751972
MGI:109442	Itga8	1.29282	MGI:1298227	Mcm6	0.722461
MGI:95851	Gsn	1.29299	MGI:1919128	Fam83d	0.762103
MGI:1098776	Lbp	1.32623	MGI:1915264	Zwilch	0.747541
MGI:2146046	Adamts12	1.25588	MGI:1890359	Igf2bp3	0.736895
MGI:98940	Vtn	1.28757	MGI:1338762	Fhl2	0.581396
MGI:106096	Loxl1	1.25971	MGI:1355328	Nasp	0.74756
MGI:109249	Adamts1	1.33098	MGI:2448388	Hist1h2bj	0.670485
MGI:2147199	Afap1l1	1.26046	MGI:2147897	Cenpi	0.768856
MGI:99909	Lama3	1.27901	MGI:106184	Npm1	0.748395
MGI:104688	Col4a3	1.25507	MGI:2448297	Hist1h2ak	0.721733
MGI:1919045	Pitpnc1	1.25732	MGI:2443514	Wdhd1	0.762281
MGI:1919154	Paqr7	1.27116	MGI:101789	Lig1	0.739484
MGI:1915051	Pllp	1.22766	MGI:1098767	Sgol2	0.749644
MGI:1915913	Slc25a25	1.33162	MGI:1914203	Cdca7	0.734379
MGI:1888499	Cxcl13	1.46286	MGI:97503	Pcna	0.726279
MGI:1924155	Lrg1	1.80115	MGI:1354959	Hs6st2	0.774802
MGI:101774	Cd79a	1.32269	MGI:5313075	Gm20628	0.701346
MGI:1926249	Car5b	1.27326	MGI:2142116	Psip1	0.777379
MGI:3041242	Sema3g	1.26781	MGI:99660	Pola1	0.748264
MGI:1352480	Igfbp7	1.28098	MGI:107940	Ezh2	0.760369
MGI:1346021	Slco2a1	1.27545	MGI:1924434	Fam64a	0.738444
MGI:104963	Npy1r	1.2854	MGI:97804	Ptn	0.742729
MGI:106215	Aqp5	1.29622	MGI:1913390	Ska2	0.775183
MGI:97531	Pdgfrb	1.28319	MGI:1313302	Cenpf	0.754559
MGI:95522	Fgfr1	1.27549	MGI:1935127	Smarca1	0.756587
MGI:1891351	Spock2	1.29322	MGI:2448306	Hist1h2ab	0.69983
MGI:1933155	Arl4d	1.30664	MGI:1095412	Unc5c	0.751497
MGI:98239	Scd1	1.39832	MGI:2442111	Ppm1k	0.770014
MGI:97608	Serpine1	1.29197	MGI:1341847	Hhip	0.748301
MGI:1345144	Spry4	1.32354	MGI:2448309	Hist1h2af	0.723099
MGI:96567	Impdh1	1.27377	MGI:2445153	Clspn	0.779542
MGI:96530	Iglv1	1.34153	MGI:1921571	Tipin	0.726801
MGI:1340899	Chil1	1.45477	MGI:2444777	Ncaph	0.760054
MGI:1276112	Cldn5	1.28236	MGI:2448386	Hist1h2bg	0.772483
MGI:2385067	Lims2	1.3254	MGI:97267	Myl4	0.600281
MGI:1888514	Cxcl14	1.38759	MGI:2444298	G2e3	0.77984
MGI:94906	Dmpk	1.30019	MGI:2157785	Peg10	0.761674
MGI:1924696	Heg1	1.2679	MGI:1349448	Cenph	0.767472
MGI:2449569	Adamts15	1.30152	MGI:94890	Dhfr	0.778814
MGI:2181202	Pfkfb3	1.27955	MGI:894678	Aurka	0.758236
MGI:3642670	Gm15428	1.58317	MGI:1306785	Ugdh	0.760719
MGI:1353468	Adamts8	1.25835	MGI:1926209	Dek	0.777916
MGI:2140175	Ldlrap1	1.24356	MGI:103197	Mcm5	0.744489
MGI:1914109	Slc16a9	1.30728	MGI:102551	Ccnf	0.749977
MGI:98753	Timp2	1.26873	MGI:1925384	Lpar4	0.781321
MGI:2442900	Tmcc3	1.29055	MGI:101845	Mcm3	0.742721
MGI:1920904	Ccrl2	1.27669	MGI:97803	Ptma	0.553745
MGI:1917977	Rasgef1a	1.27437	MGI:1917722	Atad2	0.76095
MGI:1918816	Clmp	1.31729	MGI:107489	Phex	0.751347
MGI:2138232	Colgalt2	1.29993	MGI:1196274	Cdca8	0.774207
MGI:104773	Adra1a	1.32688	MGI:1933744	Cenpq	0.78944
MGI:96828	Lrp1	1.31801	MGI:102688	H2afx	0.727127
MGI:3845028	Sprr2a3	1.51637	MGI:1289298	Knstrn	0.760935
MGI:1890662	Slc9a3r2	1.28747	MGI:104597	Tnnt2	0.416366
MGI:88057	Apoe	1.32529	MGI:95490	Fbn2	0.748394
MGI:87874	Ace	1.29183	MGI:2673709	Kntc1	0.770803
MGI:109169	Epas1	1.30743	MGI:5477374	Gm26880	0.736375
MGI:97744	Por	1.28483	MGI:2448326	Hist1h3e	0.724325
MGI:96109	Hlx	1.40013	MGI:1919787	Cdca2	0.790164
MGI:1915703	Gpihbp1	1.30253	MGI:1351328	Dbf4	0.77338
MGI:1915166	Ppap2b	1.30554	MGI:1916513	Rfc3	0.79468
MGI:98736	Thbd	1.29892	MGI:1918780	Gas2l3	0.755189
MGI:99547	Iglc2	1.41018	MGI:1919665	Sgol1	0.787158
MGI:95574	Fos	1.53198	MGI:2448350	Hist1h3i	0.712099
MGI:2148896	Palmd	1.34282	MGI:1926210	Cenpk	0.778084
MGI:1917912	Clic5	1.32192	MGI:1338017	Bex2	0.735995
MGI:1341110	Adcy8	1.36471	MGI:104537	Brca1	0.786366
MGI:2449112	Adamts10	1.35465	MGI:1917487	Bhlhb9	0.788445
MGI:88598	Cyp2b10	1.43947	MGI:102472	mt-Tv	0.685691
MGI:2663511	Reps2	1.31803	MGI:88268	Car1	0.696597
MGI:104661	Rora	1.30524	MGI:1330312	Magoh	0.71788
MGI:98727	Tgfb3	1.33049	MGI:1347487	Foxm1	0.760765
MGI:2652845	Cdc42bpg	1.30697	MGI:98954	Wnt2	0.751647
MGI:1346321	Adamts5	1.32371	MGI:1920018	Topbp1	0.802404
MGI:99180	Zfp36	1.37317	MGI:1338073	Cdc45	0.789261
MGI:2182928	Gpr116	1.30366	MGI:1931797	Ckap2	0.781128
MGI:1316737	G0s2	1.35046	MGI:1929091	Fam60a	0.782148
MGI:96495	Igkc	1.47158	MGI:1314881	Chaf1b	0.771414
MGI:1096574	Car4	1.39995	MGI:103300	Rbl1	0.788917
MGI:96392	Icam1	1.34965	MGI:101783	Plk4	0.79646
MGI:1916823	Hilpda	1.3455	MGI:2448425	Hist1h4f	0.700528
MGI:96431	Cd79b	1.35012	MGI:2670972	Frem1	0.778176
MGI:1345277	Ddr2	1.34683	MGI:95283	Edn1	0.766756
MGI:1914872	Mxra7	1.35578	MGI:1933184	Nop58	0.776682
MGI:98738	Thbs2	1.38035	MGI:2448404	Hist1h2bm	0.758752
MGI:88235	C7	1.74675	MGI:1924994	Bora	0.793569
MGI:1342772	Klf2	1.47419	MGI:106920	Tmpo	0.799945
MGI:2137237	Fam129a	1.35935	MGI:105380	Mcm2	0.761746
MGI:97475	Pam	1.32755	MGI:1915525	Rpa1	0.80569
MGI:95295	Egr1	1.56327	MGI:1196391	Pole	0.779699
MGI:1932137	Tnxb	1.36295	MGI:1924261	Ticrr	0.798547
MGI:3039578	Ecm2	1.36262	MGI:1932288	Egln3	0.755678
MGI:97005	Mmp12	1.9683	MGI:2444465	Frem2	0.786363
MGI:97570	Abcb1a	1.36407	MGI:1891925	Hnrnph1	0.774434
MGI:1270156	2016-09-04	1.31354	MGI:3028642	Iqgap3	0.791187
MGI:1925911	C1qtnf7	1.37107	MGI:2442925	Atad5	0.811139
MGI:1333856	Klf9	1.36077	MGI:98423	Ssb	0.747754
MGI:101948	Wnt11	1.40174	MGI:2445221	Cd109	0.797986
MGI:88594	Cyp27a1	1.34663	MGI:1914302	Ndc80	0.80851
MGI:3588195	Adamts17	1.38673	MGI:108515	Cbx3	0.767946
MGI:2148202	Ces1d	1.37806	MGI:98935	Vldlr	0.786835
MGI:103151	Pltp	1.35847	MGI:2446977	Kif18a	0.808728
MGI:1890465	Ear11	1.70685	MGI:1924226	Arxes2	0.758935
MGI:2148811	Npnt	1.38803	MGI:2442875	Adamts19	0.817408
MGI:98731	Tgm2	1.45015	MGI:1329034	Ccne2	0.781976
MGI:1929600	Pmepa1	1.38925	MGI:1351326	Nrk	0.784115
MGI:1916776	Fmo2	1.63127	MGI:2442829	Klhl4	0.744255
MGI:1329039	Ccl17	1.57531	MGI:1194910	Rbbp7	0.801393
MGI:96534	Cd74	1.5097	MGI:3648068	Gm6091	0.75968
MGI:1888978	Ntn4	1.4253	MGI:1890476	Rad18	0.796644
MGI:87997	Alox15	1.92163	MGI:1916889	Exosc8	0.802902
MGI:104697	Muc5ac	1.5719	MGI:1315198	Cdca3	0.779205
MGI:88106	Atp1a2	1.38261	MGI:88316	Ccne1	0.794655
MGI:107379	Gstt1	1.37623	MGI:1915349	Fam92a	0.772974
MGI:1929213	Zbtb20	1.40504	MGI:2144013	Xpo1	0.803167
MGI:95901	H2-Eb1	1.77281	MGI:1915326	Dnajc9	0.804141
MGI:1922394	Pdzd2	1.43219	MGI:102488	mt-Te	0.624727
MGI:1919619	Ehd4	1.45674	MGI:101939	Hmgcs2	0.716158
MGI:103562	Hsd11b1	1.40307	MGI:1339939	Rpa2	0.801709
MGI:99782	Nt5e	1.51804	MGI:104670	Fkbp5	0.662414
MGI:88607	Cyp2e1	1.6006	MGI:106038	Lrrn1	0.791786
MGI:2444336	Fcgbp	1.65737	MGI:1926232	Srsf7	0.7986
MGI:1918988	Mamdc2	1.55339	MGI:104564	Cdkn1c	0.770812
MGI:95895	H2-Aa	1.58624	MGI:1913393	Eef1e1	0.785957
MGI:109406	Reg3g	2.20277	MGI:97890	Rad51	0.770469
MGI:2145953	Kdelr3	1.43325	MGI:1918110	2016-09-10	0.819704
MGI:1347356	Adamts2	1.4672	MGI:103180	Tcf19	0.776096
MGI:1934659	Pi15	1.48801	MGI:98344	Snrpd1	0.795574
MGI:88613	Cyr61	1.63985	MGI:96902	Lyz1	0.765625
MGI:97601	Prkcq	1.51958	MGI:1926264	Tspan6	0.793565
MGI:102963	Inmt	2.52512	MGI:2142989	Ncapd3	0.801923
MGI:2151110	Prelp	1.56256	MGI:1277103	Nudcd2	0.789107
MGI:99502	Ltbp2	1.63625	MGI:109359	Nek2	0.797285
MGI:96440	Igfbp5	1.46539	MGI:1328362	Blm	0.812264
MGI:105045	Serpina3n	2.25027	MGI:87881	Acp1	0.801959
MGI:103080	Pigr	1.69746	MGI:98346	Snrpe	0.750403
MGI:103070	H2-Ab1	1.7877	MGI:96269	Ranbp1	0.810096
MGI:1916433	C1qtnf2	1.47002	MGI:1915099	Cdca5	0.7963
MGI:1194503	Atp2a3	1.48414	MGI:98878	Tyms	0.812173
MGI:105120	Dusp1	1.91108	MGI:87905	Actc1	0.549587
MGI:95808	Gria1	1.63727	MGI:103075	Wee1	0.791354
MGI:2385729	Mgl2	1.77668	MGI:2448377	Hist1h2bb	0.762089
MGI:1306805	Tff2	1.83151	MGI:98285	Srsf3	0.780622
MGI:1918882	Scn3b	1.55658	MGI:1917274	Mcm10	0.827358
MGI:2445082	Pamr1	1.5653	MGI:96435	Igf2r	0.787416
MGI:1347002	Angptl2	1.59582	MGI:1916520	Gins1	0.804311
MGI:94917	Dpep1	1.7064	MGI:106198	Stfa1	0.65866
MGI:1346029	Slc26a4	2.80123	MGI:2155936	Pask	0.823035
MGI:96437	Igfbp2	1.74425	MGI:1914427	Cdt1	0.795699
MGI:1923727	Pcolce2	1.68839	MGI:2685821	Hjurp	0.767933
MGI:1928765	Scube2	1.8593	MGI:98147	Rps24	0.733178
MGI:1932052	Chia1	2.40021	MGI:106196	Stfa3	0.738598
MGI:1921430	Muc5b	2.09201	MGI:97373	Npr3	0.702474
MGI:95317	Eln	1.66095	MGI:1919096	Syce2	0.818586
MGI:1352752	Pde7b	1.6454	MGI:1931527	Hist1h1e	0.775702
MGI:88490	Crabp1	2.21412	MGI:1333112	Ran	0.791037
MGI:1925044	Adamtsl2	1.98304	MGI:2384584	Rfwd3	0.787116
MGI:103181	Sod3	1.73823	MGI:101947	Hnrnpd	0.808462
MGI:1913425	Mustn1	1.83577	MGI:97255	Myh6	0.433638
MGI:107557	Sema3c	1.76717	MGI:1097706	Cetn3	0.790057
MGI:1352454	Nr4a1	3.27037	MGI:1914862	Mettl9	0.793481
MGI:1341098	Chil4	3.21699	MGI:1917814	Fam213a	0.74507
MGI:2137431	Bpifb1	3.57248	MGI:107634	Larp7	0.803069
MGI:96976	Mgp	2.13612	MGI:102491	mt-Ta	0.590085
MGI:108058	Adm	1.91836	MGI:1929269	Tmed2	0.763251
MGI:1330860	Chil3	4.55677	MGI:1922567	Parpbp	0.79827
MGI:1888504	Retnla	2.94246	MGI:1919905	Snhg5	0.749606
MGI:1346342	Clca3	9.65478	MGI:97758	Prim2	0.806769
			MGI:98283	Srsf1	0.817339
			MGI:1351663	Skp2	0.822362
			MGI:3648264	Gm7110	0.781877
			MGI:1926465	Hnrnpm	0.816811
			MGI:1931352	Slc43a1	0.819127
			MGI:1913883	Nsa2	0.824081
			MGI:103232	Grb10	0.824924
			MGI:1859284	Cldn6	0.823162
			MGI:1913820	Cenpm	0.809999
			MGI:107549	Tbca	0.793908
			MGI:5474850	Hbb-bt	0.700916
			MGI:1328321	Bex1	0.81102
			MGI:97290	Ndn	0.798429
			MGI:1929721	Rrs1	0.797989
			MGI:2155399	Polq	0.82126
			MGI:2183441	Psat1	0.806165
			MGI:3590554	BC055324	0.825785
			MGI:2446979	Kif18b	0.811466
			MGI:88478	Cpa1	0.774388
			MGI:1915985	Mrps18c	0.796827
			MGI:1914931	Mrpl18	0.8215
			MGI:95880	Gypa	0.7297
			MGI:1913721	Anp32e	0.78562
			MGI:1913659	Rsl1d1	0.833358
			MGI:1917704	Cenpl	0.826447
			MGI:1925901	Lsm6	0.813459
			MGI:1922873	Tex30	0.802225
			MGI:2153470	Scgb3a2	0.722303
			MGI:1914962	Slc25a37	0.732977
			MGI:107914	Tia1	0.800893
			MGI:1926186	Wdr76	0.818713
			MGI:1913284	Psmd14	0.808281
			MGI:1888496	Tbx20	0.677542
			MGI:1339795	Smc3	0.824688
			MGI:3649494	Gm12245	0.630247
			MGI:104772	Cdk2	0.815868
			MGI:1099460	Rbm3	0.783804
			MGI:1913557	Isoc1	0.821225
			MGI:893586	Nhp2l1	0.802642
			MGI:104589	Actg2	0.774138
			MGI:2447819	2610524H06Rik	0.791339
			MGI:1915097	Sncaip	0.830944
			MGI:1343045	Rbmxl1	0.822592
			MGI:107812	Tubb5	0.797779
			MGI:98297	Shh	0.802025
			MGI:1345186	Blmh	0.809098
			MGI:1926017	Efcab11	0.839618
			MGI:2146005	Mtbp	0.823159
			MGI:1913611	Zfand1	0.739622
			MGI:2444912	Mbnl3	0.810205
			MGI:894697	Rad54l	0.813623
			MGI:2385198	Usp1	0.812831
			MGI:1929285	Orc6	0.809016
			MGI:103219	Meox2	0.792713
			MGI:104805	Snrpb2	0.822355
			MGI:104890	Tpt1	0.737993
			MGI:1298398	Mcm7	0.800295
			MGI:1313288	Incenp	0.816702
			MGI:2448480	Fancd2	0.830942
			MGI:1917135	Aunip	0.82977
			MGI:1920037	Ndc1	0.816241
			MGI:1306799	D17H6S56E-5	0.785168
			MGI:1913447	Cks2	0.797276
			MGI:1917162	Nup43	0.83207
			MGI:105378	Adam12	0.800102
			MGI:1915025	Rtp4	0.698109
			MGI:1914848	Uchl5	0.82711
			MGI:1333804	Vbp1	0.808284
			MGI:1346051	Dut	0.814442
			MGI:1929507	Arl6ip6	0.818108
			MGI:3643564	Gm16380	0.630621
			MGI:99257	Eif3e	0.799298
			MGI:1196260	Hn1l	0.796247
			MGI:2448322	Hist1h3d	0.824137
			MGI:107450	Dld	0.814048
			MGI:2442264	Idi1	0.802187
			MGI:1914879	Spc24	0.8248
			MGI:1890358	Igf2bp2	0.822186
			MGI:2448295	Hist1h2ah	0.788712
			MGI:109192	Actn2	0.470185
			MGI:1351744	Eif3m	0.750365
			MGI:1859274	Pdlim3	0.789253
			MGI:1920362	Abracl	0.783711
			MGI:1919598	Aif1l	0.824862
			MGI:1919912	Dis3	0.838985
			MGI:1913356	Smpx	0.692397
			MGI:99537	Rabggtb	0.799593
			MGI:1923772	Lsm8	0.814554
			MGI:1339951	Cse1l	0.834468
			MGI:105983	Ngp	0.761849
			MGI:1917870	Ube2v2	0.819206
			MGI:1337006	Hapln1	0.717758
			MGI:2387633	Haus3	0.831505
			MGI:1859866	Cdc20	0.813455
			MGI:1915312	Btf3l4	0.835549
			MGI:2149632	Rpl31	0.768793
			MGI:1330276	Cops2	0.822781
			MGI:2654144	Ercc6l	0.839494
			MGI:1343961	Msh6	0.835411
			MGI:97051	Mdh1	0.781839
			MGI:2448526	Gmps	0.831243
			MGI:1916060	Nexn	0.802328
			MGI:1926462	Hnrnph3	0.808827
			MGI:1276574	Whsc1	0.830788
			MGI:1298379	Matr3	0.830588
			MGI:3642955	Gm5643	0.798525
			MGI:1309469	Casq2	0.582196
			MGI:3606482	Colec10	0.819
			MGI:87921	Adh1	0.82482
			MGI:2441662	Zfp931	0.756753
			MGI:102805	Entpd1	0.826144
			MGI:1203517	Birc5	0.825995
			MGI:1923389	Haus6	0.829306
			MGI:1915336	Zdhhc15	0.834306
			MGI:1915437	Fam135a	0.836105
			MGI:102476	mt-Tr	0.748005
			MGI:97795	Ptger3	0.822216
			MGI:109393	Slc4a1	0.725881
			MGI:1917650	Adamdec1	0.66038
			MGI:3645829	Gm7125	0.837818
			MGI:1914677	Rps20	0.811417
			MGI:102844	Mybpc3	0.451741
			MGI:3705507	Gm14586	0.793632
			MGI:108089	Erh	0.734791

## Sheet: ALV3vsALV4
UPREGULATED			DOWNREGULATED
MGI_ID	Symbol	FoldChange	MGI_ID	Symbol	FoldChange
MGI:1096344	Ampd3	1.19115	MGI:3036230	Slc27a6	0.327003
MGI:2385644	Ms4a6c	1.23969	MGI:102889	Vcan	0.351706
MGI:1914989	Slc48a1	1.17627	MGI:101922	Tnc	0.340688
MGI:1929899	Sqrdl	1.17862	MGI:1915905	Fndc1	0.444128
MGI:2444054	Arl11	1.15951	MGI:1859274	Pdlim3	0.443645
MGI:5433952	Gm21788	2.02551	MGI:2444800	Prss35	0.339464
MGI:1913633	Iscu	1.19173	MGI:3051647	Pappa2	0.486621
MGI:1925558	Gpr108	1.15569	MGI:2670972	Frem1	0.458693
MGI:1913844	Uqcr11	1.21993	MGI:95490	Fbn2	0.55513
MGI:3819493	Snora21	1.53947	MGI:87963	Agt	0.430043
MGI:1918876	Gimap6	1.22329	MGI:109610	Enc1	0.627919
MGI:1920795	1700094D03Rik	1.25359	MGI:103219	Meox2	0.533158
MGI:1922722	1700009P17Rik	1.15365	MGI:104902	Gpc4	0.568548
MGI:96659	Kcna2	1.1796	MGI:104589	Actg2	0.491216
MGI:105104	Rprl2	1.30605	MGI:1917695	Cd248	0.558339
MGI:2157899	Tmem37	1.19403	MGI:1929076	Htra1	0.514389
MGI:97520	Pcx	1.20313	MGI:2664902	Mark1	0.612319
MGI:1915254	Tmem9b	1.17377	MGI:99959	Tgfbi	0.418769
MGI:1921430	Muc5b	1.41907	MGI:2446854	Gpr64	0.631172
MGI:1194898	Ppl	1.18921	MGI:1922990	Egfem1	0.424627
MGI:1330284	Slc16a7	1.23538	MGI:1100850	Capn6	0.541398
MGI:104908	Ptk2b	1.17223	MGI:87909	Acta2	0.576932
MGI:1861441	Rab27a	1.1896	MGI:2155705	P2ry14	0.505194
MGI:101842	Pla2g1b	1.241	MGI:88448	Col12a1	0.622175
MGI:1859650	Ramp2	1.13506	MGI:2444049	P4ha3	0.589067
MGI:103224	Fdx1	1.18021	MGI:102643	Myh11	0.568247
MGI:1918956	Slc46a3	1.16598	MGI:96949	Mdk	0.55541
MGI:1915166	Ppap2b	1.17918	MGI:2137913	Loxl2	0.594608
MGI:2443100	Bend7	1.1563	MGI:1921738	Lrrc15	0.658103
MGI:4439734	Ighv8-13	1.31532	MGI:1925751	Itih5	0.64287
MGI:104650	Cnr2	1.21917	MGI:1927070	Dusp10	0.644426
MGI:1916051	Elovl5	1.16214	MGI:1274781	Robo1	0.634008
MGI:97995	Rny1	1.40017	MGI:109131	Stc1	0.649072
MGI:1913316	Gng11	1.15568	MGI:1918001	6330403K07Rik	0.579611
MGI:1914719	Abhd5	1.13914	MGI:2443787	Rnf152	0.692512
MGI:1931307	Slc19a3	1.15668	MGI:103232	Grb10	0.648715
MGI:1338788	Pex11a	1.17863	MGI:1917754	Galnt16	0.656481
MGI:1861728	Wwp1	1.17707	MGI:98738	Thbs2	0.544615
MGI:96969	Met	1.18647	MGI:1931838	Dbn1	0.656118
MGI:2182928	Gpr116	1.17914	MGI:99217	Cdh11	0.665634
MGI:1346016	Arhgef28	1.17604	MGI:2181363	Prokr2	0.641054
MGI:1927638	Dnaja4	1.16975	MGI:1095412	Unc5c	0.650002
MGI:87890	Chrnb1	1.16245	MGI:1315205	Slit2	0.622304
MGI:3584510	Wdfy4	1.21308	MGI:1347479	Foxf2	0.66017
MGI:1924151	Jade2	1.17161	MGI:105378	Adam12	0.672355
MGI:1916014	Cdhr3	1.20141	MGI:99444	Nrep	0.664088
MGI:1924209	Chmp5	1.16753	MGI:101784	Nes	0.633463
MGI:99478	Cckar	1.15541	MGI:1858229	Ppp1r3c	0.648466
MGI:2139628	Ctso	1.16333	MGI:98958	Wnt5a	0.52978
MGI:1914693	Map1lc3b	1.17646	MGI:1096393	Snai2	0.608209
MGI:2684972	Fhdc1	1.19484	MGI:1891160	Chst2	0.691834
MGI:5452497	Gm22720	1.27274	MGI:98366	Sox4	0.672949
MGI:1923759	Plet1	1.28205	MGI:1347521	Ror2	0.729515
MGI:97231	Muc1	1.20865	MGI:95489	Fbn1	0.69648
MGI:99448	Ifi47	1.32346	MGI:1919369	Tpx2	0.642366
MGI:96745	Lamp1	1.14643	MGI:2443198	Slitrk6	0.603306
MGI:1095410	Tuba4a	1.16566	MGI:1354952	Dkk3	0.683156
MGI:1347245	Ceacam1	1.17176	MGI:102793	Fstl1	0.659077
MGI:2146049	Tmem71	1.16545	MGI:99502	Ltbp2	0.566781
MGI:1354713	Acsl4	1.21365	MGI:106035	Mki67	0.609066
MGI:1923484	Magi3	1.19113	MGI:2685047	Hmcn1	0.634532
MGI:97602	Prkcz	1.15699	MGI:96968	Mest	0.590695
MGI:1916348	Tmem176b	1.18285	MGI:1349423	Racgap1	0.635436
MGI:894326	Atp6v1e1	1.15544	MGI:107489	Phex	0.575573
MGI:98919	Scgb1a1	1.17796	MGI:88025	Ank2	0.722438
MGI:1923437	Adhfe1	1.18733	MGI:88458	Col5a2	0.729939
MGI:95660	Gas6	1.16929	MGI:1915674	Chn1	0.719218
MGI:104993	Lepr	1.20373	MGI:104769	Fkbp10	0.681299
MGI:5456217	Gm26440	1.62261	MGI:1858961	Prc1	0.608108
MGI:104295	Sla	1.2693	MGI:97370	Enpp1	0.621633
MGI:1913731	Rps21	1.19826	MGI:101948	Wnt11	0.641919
MGI:88476	Cp	1.22616	MGI:98790	Top2a	0.586875
MGI:1888711	Pf4	1.21843	MGI:2145236	Lhfpl2	0.665464
MGI:1919045	Pitpnc1	1.19717	MGI:2683536	Klhl23	0.712176
MGI:5477292	Gm26798	1.26577	MGI:96795	Lmnb1	0.664998
MGI:107539	Klrb1b	1.18255	MGI:98726	Tgfb2	0.719121
MGI:1353424	Timm8b	1.21254	MGI:1921444	Rnd3	0.742737
MGI:3644742	Gm7618	1.30126	MGI:2447063	Tenm4	0.759822
MGI:1921396	Dock8	1.20911	MGI:1347520	Ror1	0.732351
MGI:95321	Emb	1.25274	MGI:101900	Mmp14	0.718745
MGI:1346088	Cd52	1.40861	MGI:2137237	Fam129a	0.676886
MGI:2450529	Pilra	1.19272	MGI:1920546	Rhobtb3	0.716012
MGI:1923513	Gstk1	1.1816	MGI:1891396	Kirrel	0.728506
MGI:2143585	Fig4	1.16632	MGI:1923724	Spon2	0.638279
MGI:98263	Ccl6	1.43359	MGI:1341272	Col14a1	0.670188
MGI:104688	Col4a3	1.19303	MGI:2651499	Pde5a	0.724305
MGI:1346318	Klf6	1.19901	MGI:1916604	Slc38a4	0.6626
MGI:99951	Mafk	1.19853	MGI:1919890	Mex3a	0.723473
MGI:2385228	Tmem119	1.1823	MGI:108069	Ccna2	0.611778
MGI:1888707	St3gal6	1.18657	MGI:99254	Etv1	0.655678
MGI:2387599	Prr15l	1.17212	MGI:88468	Col1a2	0.727343
MGI:97612	Plaur	1.28326	MGI:87921	Adh1	0.668937
MGI:1925938	Nol3	1.16396	MGI:2442062	Sh3pxd2b	0.733859
MGI:2445289	Plac8	1.41978	MGI:1930780	Myh10	0.70961
MGI:1924488	Nipal2	1.16941	MGI:2443061	Tmem132c	0.70315
MGI:1929501	Arl6ip5	1.16562	MGI:1861461	Hist1h1b	0.604992
MGI:2444067	Pqlc3	1.25703	MGI:1349645	Islr	0.64181
MGI:1925666	Rnase6	1.22045	MGI:96439	Igfbp4	0.720829
MGI:3819539	Snord49b	1.80647	MGI:2685177	Megf10	0.744043
MGI:1344370	Ndufc2	1.34033	MGI:1918794	Arhgap42	0.713728
MGI:2444343	Nbeal1	1.22659	MGI:1933157	Pdzrn3	0.733137
MGI:1858203	Rab25	1.17374	MGI:107940	Ezh2	0.732369
MGI:106015	Cox7a2l	1.21582	MGI:2442695	Creb3l2	0.720682
MGI:2142292	Mtmr10	1.16503	MGI:88457	Col5a1	0.734412
MGI:2388637	Wwc1	1.24076	MGI:104904	Tead2	0.740662
MGI:1922394	Pdzd2	1.22108	MGI:2388073	Camk1g	0.728633
MGI:2388479	Ppp2r5a	1.18837	MGI:95729	Gli3	0.757644
MGI:1919308	Igsf5	1.16697	MGI:101780	Serpine2	0.65816
MGI:2685781	Npw	1.34145	MGI:1890110	Robo2	0.684975
MGI:1352457	Nr4a3	1.27555	MGI:98181	Rrm2	0.665067
MGI:1891259	Lrat	1.31137	MGI:108075	Smo	0.772585
MGI:2448476	Smagp	1.19275	MGI:104750	Nrcam	0.734478
MGI:2447362	Slc24a4	1.18738	MGI:2685011	Dchs1	0.721557
MGI:2388271	Mylip	1.19332	MGI:2665139	Rerg	0.704363
MGI:1915221	Tppp3	1.28299	MGI:1344407	Zeb2	0.757904
MGI:107422	Hspa4l	1.2077	MGI:99612	Epha3	0.741782
MGI:1916524	Ctdspl	1.16694	MGI:103029	Mdk-ps1	0.746445
MGI:2685410	Tmem212	1.29408	MGI:1201682	Kif20a	0.691608
MGI:95411	Erbb3	1.20132	MGI:1928392	Dpt	0.714907
MGI:3526567	Srsy	2.5432	MGI:88467	Col1a1	0.700613
MGI:1925225	Tmem50b	1.1547	MGI:106209	Hells	0.715627
MGI:1276109	Cldn1	1.24652	MGI:88302	Ccnb1	0.650236
MGI:2145458	Akr1c14	1.30201	MGI:1277980	Fgf18	0.724756
MGI:1351618	Dnajb9	1.19968	MGI:2444961	Dennd2a	0.745521
MGI:98146	Rps18	1.69314	MGI:1920174	Anln	0.676362
MGI:1196458	Scarb2	1.15263	MGI:1934569	Cpxm1	0.729192
MGI:1914098	Fuca2	1.17628	MGI:1924434	Fam64a	0.689826
MGI:2445415	Pknox2	1.1582	MGI:2147810	Tmem132a	0.758119
MGI:1913819	Gdpd1	1.18812	MGI:1913692	Spc25	0.737369
MGI:1891123	Kcne2	1.19067	MGI:5477374	Gm26880	0.669519
MGI:3589109	Sgpp2	1.28801	MGI:88461	Col6a3	0.716887
MGI:107498	Ltc4s	1.19338	MGI:1195462	Gfra2	0.72662
MGI:2183153	Pkhd1l1	1.23782	MGI:1919583	Palld	0.749043
MGI:1916704	Clic3	1.2682	MGI:98727	Tgfb3	0.72222
MGI:2442933	Amn1	1.20543	MGI:95556	Flna	0.760446
MGI:1344364	Usp18	1.1915	MGI:2444300	Arhgap11a	0.66708
MGI:96074	Hexb	1.23215	MGI:3833934	Gm16314	0.793668
MGI:96778	Lgals3	1.36758	MGI:2443310	Olfml2b	0.648438
MGI:5456174	Gm26397	1.40318	MGI:97815	Ptprs	0.750078
MGI:1924415	Atp6v0d2	1.34011	MGI:105380	Mcm2	0.735474
MGI:2444814	Cped1	1.17081	MGI:1352474	Tnfrsf19	0.755366
MGI:1344382	Creg1	1.22429	MGI:2384982	Cdca7l	0.735407
MGI:106651	Ly6e	1.20511	MGI:1914227	Nuf2	0.676326
MGI:109322	Kcnk1	1.55187	MGI:1098231	Kif11	0.686731
MGI:1921384	Cyp2s1	1.21145	MGI:105377	Adam19	0.756598
MGI:96394	Icam2	1.19891	MGI:1916151	Gpr126	0.763022
MGI:108395	Vnn1	1.36665	MGI:1918944	Ipo9	0.762835
MGI:1310004	Fmo5	1.18226	MGI:2444826	Vash2	0.759138
MGI:1278336	Cdkl5	1.22783	MGI:95487	Fbln1	0.746231
MGI:1928482	Mbnl1	1.14723	MGI:2384945	Samd14	0.781751
MGI:2147006	Gnptg	1.17061	MGI:1341163	Tacc3	0.742017
MGI:1917379	Slc44a4	1.18227	MGI:1923936	Clip3	0.759107
MGI:1921663	Tc2n	1.25413	MGI:1337004	Loxl3	0.762068
MGI:1927073	Slc29a1	1.15458	MGI:1926189	Emilin1	0.785286
MGI:1891250	Gprc5a	1.18353	MGI:88180	Bmp4	0.746553
MGI:98931	Ezr	1.17334	MGI:1921436	Ccdc3	0.681755
MGI:893578	Scarb1	1.19078	MGI:1935127	Smarca1	0.756163
MGI:2686925	Cyb561a3	1.20261	MGI:1913685	Uggt2	0.757832
MGI:1916577	1700007K13Rik	1.19709	MGI:2146149	Egflam	0.74151
MGI:88035	Aox1	1.1885	MGI:106920	Tmpo	0.787996
MGI:87964	Agtr1a	1.1668	MGI:1914649	Pdlim7	0.772787
MGI:101939	Hmgcs2	1.26043	MGI:1928478	Brinp1	0.765533
MGI:1345961	Coro1a	1.26335	MGI:1298229	Nid2	0.770699
MGI:1915671	Lmbrd1	1.1649	MGI:1352745	Fscn1	0.734781
MGI:2146512	Slc7a4	1.16187	MGI:102556	Tbx4	0.748342
MGI:107505	Alox5ap	1.30955	MGI:95718	Gjc1	0.770414
MGI:99450	Ifit1	1.20098	MGI:2652872	Nynrin	0.761153
MGI:1352462	Nr1h3	1.18441	MGI:88176	Bmp1	0.733932
MGI:1927468	Samhd1	1.1767	MGI:2146335	C330027C09Rik	0.715394
MGI:894695	Galnt3	1.17289	MGI:1933973	Rbfox2	0.806928
MGI:1277180	Ifi27	1.19511	MGI:3045323	Trim67	0.717621
MGI:2151071	C1galt1	1.20602	MGI:107812	Tubb5	0.740917
MGI:105103	Rprl3	1.40708	MGI:2441849	Lpp	0.761054
MGI:1313266	Alcam	1.16832	MGI:97757	Prim1	0.739229
MGI:95678	Gda	1.26656	MGI:3037658	H2afy2	0.731488
MGI:4439838	Trac	1.36609	MGI:101845	Mcm3	0.729078
MGI:1913675	Pcp4l1	1.21935	MGI:95891	H19	0.57618
MGI:95585	Cidec	1.18799	MGI:1338889	Uhrf1	0.694078
MGI:3648620	Gm6055	1.30605	MGI:108389	Kif4	0.720641
MGI:2138391	Pid1	1.185	MGI:1313302	Cenpf	0.728206
MGI:96073	Hexa	1.2119	MGI:1933966	Mcam	0.782089
MGI:95515	Fgf1	1.21078	MGI:97342	Nid1	0.769711
MGI:2179715	Pla2g16	1.18035	MGI:94912	Dnmt1	0.778411
MGI:1346878	Map3k8	1.15877	MGI:1923714	Casc5	0.710008
MGI:3819543	Snord55	1.38438	MGI:3641865	Gm10357	0.756355
MGI:1924955	9230104L09Rik	1.3362	MGI:99559	Mfap2	0.742417
MGI:1914361	Naaa	1.28774	MGI:1919696	Prr5l	0.751816
MGI:3704345	Rps27rt	1.74772	MGI:99486	Clcn5	0.781909
MGI:1346526	Psmb9	1.21498	MGI:1347346	Adamts7	0.792066
MGI:98178	Trim30a	1.21184	MGI:107168	Aurkb	0.722355
MGI:1913826	Uqcrh	1.32263	MGI:1888908	Aldh18a1	0.750317
MGI:1347050	Aldh1a7	1.23438	MGI:1098566	Gypc	0.786815
MGI:109544	Aim1	1.18047	MGI:2443629	9930013L23Rik	0.694741
MGI:1913493	C1galt1c1	1.2287	MGI:97801	Pth1r	0.771917
MGI:1922595	Slamf7	1.2117	MGI:97143	Marcksl1	0.653482
MGI:1918962	Dram1	1.1927	MGI:88314	Ccnd2	0.805453
MGI:1349396	Acot1	1.23515	MGI:3028642	Iqgap3	0.766715
MGI:2386853	Rassf4	1.24031	MGI:1919069	Kif23	0.724795
MGI:1313258	Slfn2	1.24519	MGI:1098230	Cenpe	0.757535
MGI:5452643	Gm22866	1.55186	MGI:1929897	Clstn2	0.782315
MGI:1918836	Ifih1	1.19779	MGI:1298227	Mcm6	0.747439
MGI:1316658	Cyba	1.25169	MGI:98494	Tbx2	0.768754
MGI:106689	Selplg	1.23528	MGI:1917943	Gpr125	0.78314
MGI:3606159	Tmem243	1.25981	MGI:1923294	Ncapg2	0.715004
MGI:1921305	Plce1	1.22632	MGI:1334448	Aspm	0.738931
MGI:1859307	Unc93b1	1.18284	MGI:1339973	Ilf3	0.810818
MGI:1915026	Vwa5a	1.18176	MGI:103188	Nfib	0.784404
MGI:1916119	Imp3	1.19399	MGI:95488	Fbln2	0.765504
MGI:1917912	Clic5	1.20016	MGI:2448326	Hist1h3e	0.683385
MGI:87883	Acp5	1.29128	MGI:1890648	Fignl1	0.741594
MGI:96530	Iglv1	1.36057	MGI:3045256	Fat4	0.753354
MGI:3026924	Fam84b	1.21708	MGI:105373	Ptch1	0.765438
MGI:1333864	Mrpl14	1.20862	MGI:1931523	Hist1h1a	0.704903
MGI:1339467	S100a6	1.29314	MGI:1918711	Ptk7	0.795128
MGI:107655	Ifngr1	1.18907	MGI:1921761	Lrrc17	0.735655
MGI:1889209	Gipc2	1.1936	MGI:104820	Hnrnpa1	0.740589
MGI:1917760	Rnf167	1.17486	MGI:1289156	Pbk	0.730325
MGI:1926076	P2ry10	1.22643	MGI:2143537	Tmem26	0.77697
MGI:1924013	Mospd2	1.17858	MGI:2138915	Myl9	0.745213
MGI:1921846	Cds1	1.17335	MGI:1196391	Pole	0.781374
MGI:2687281	Fam105a	1.2064	MGI:1345277	Ddr2	0.744931
MGI:1891340	Lpin1	1.20095	MGI:5313075	Gm20628	0.670208
MGI:1921997	Ddit4	1.27512	MGI:88250	Cald1	0.737822
MGI:104684	Eps8	1.1766	MGI:97621	Plk1	0.700238
MGI:2143362	Zfp809	1.18522	MGI:3642955	Gm5643	0.718413
MGI:2384918	Tspan8	1.25513	MGI:2444314	Fat3	0.76475
MGI:1917384	2210011C24Rik	1.20694	MGI:1203524	Smarcc1	0.785427
MGI:3052471	Slc2a12	1.20387	MGI:1202065	Chek1	0.762435
MGI:1917362	Sft2d2	1.16928	MGI:3665441	Tvp23a	0.808346
MGI:97180	Mapt	1.18623	MGI:2146005	Mtbp	0.794548
MGI:1913975	Lrrk2	1.23849	MGI:95893	H1f0	0.790542
MGI:1919489	Parp14	1.24297	MGI:88269	Car2	0.776466
MGI:1355313	C1ra	1.22665	MGI:1306778	Map1b	0.747911
MGI:2675603	Trpm6	1.20219	MGI:1277122	Rcn3	0.761004
MGI:1927498	Rgs18	1.34308	MGI:3513977	Apcdd1	0.771069
MGI:1924919	Arhgef38	1.22629	MGI:3641930	Gm16494	0.770355
MGI:104741	Nfkbia	1.2598	MGI:101789	Lig1	0.770977
MGI:2148180	Snora69	1.33007	MGI:1914856	Fibin	0.758144
MGI:1330860	Chil3	2.17998	MGI:103180	Tcf19	0.75834
MGI:1349462	Uba7	1.18497	MGI:95281	Ect2	0.735959
MGI:1922925	Mfsd6	1.1916	MGI:103197	Mcm5	0.742609
MGI:1913308	Tmem176a	1.28099	MGI:1914203	Cdca7	0.770788
MGI:1329044	Cldn3	1.19985	MGI:3041235	Ska3	0.770105
MGI:2182839	Serpina3h	1.41733	MGI:96743	Lamb1	0.81037
MGI:1278319	Fpr2	1.4612	MGI:1919950	Zfp618	0.813267
MGI:102772	Gbp2	1.23365	MGI:1925810	Gpr124	0.775552
MGI:2139014	Osbpl6	1.2241	MGI:1333889	Bub1b	0.727154
MGI:95432	Ces1e	1.19661	MGI:103307	Cacnb3	0.794887
MGI:107200	Cbr2	1.18443	MGI:2445153	Clspn	0.803147
MGI:2144765	Pld4	1.29176	MGI:88311	Ccnb2	0.727617
MGI:1349721	Tob1	1.16891	MGI:1926259	Iigp1	0.750839
MGI:3029307	Tusc5	1.19482	MGI:1921054	Kif2c	0.730133
MGI:3780384	Gm2214	1.37793	MGI:99454	Irs1	0.783945
MGI:1915213	Npc2	1.2078	MGI:1920480	Bmper	0.798634
MGI:109380	Il10rb	1.18958	MGI:106067	Smc2	0.728352
MGI:107341	Ctss	1.29516	MGI:2685195	Zbtb34	0.795842
MGI:2663075	Adap2	1.21442	MGI:1313288	Incenp	0.794656
MGI:88330	Cd37	1.23523	MGI:3612184	Ccdc8	0.790471
MGI:1930923	Slurp1	1.22984	MGI:94885	Des	0.792991
MGI:88026	Ank3	1.24301	MGI:1353633	Fus	0.768684
MGI:1916924	Mif4gd	1.17505	MGI:2444477	Rbms3	0.805611
MGI:1321404	Ly86	1.33317	MGI:2384588	Neil3	0.757791
MGI:96392	Icam1	1.23379	MGI:1914371	Mastl	0.785944
MGI:1889371	Il17re	1.20591	MGI:107739	Casp3	0.814081
MGI:1277211	Tyrobp	1.43906	MGI:95557	Flnc	0.799361
MGI:4439731	Trbj2-7	1.44774	MGI:109497	Gata5	0.773809
MGI:108046	Laptm5	1.3084	MGI:2142116	Psip1	0.813031
MGI:2442082	Tmem30b	1.20564	MGI:88255	Anxa6	0.786611
MGI:106912	Emr1	1.32066	MGI:2157785	Peg10	0.797842
MGI:109553	Ctsc	1.23364	MGI:1346091	Fbln5	0.78946
MGI:1310000	Kcnj15	1.32852	MGI:97297	Nedd4	0.810887
MGI:2443575	Mettl20	1.25232	MGI:1099790	Plk2	0.722524
MGI:96590	Irf1	1.22215	MGI:1918252	Mex3b	0.794143
MGI:2442042	Dpep2	1.17779	MGI:96608	Itgav	0.81304
MGI:1913961	Sbds	1.22656	MGI:99914	Lamc1	0.801414
MGI:1913760	Rnf181	1.21749	MGI:96184	Hoxb3	0.808585
MGI:1923658	Abcc3	1.20204	MGI:1925139	Lbh	0.818869
MGI:98266	Sord	1.3123	MGI:1353621	Zfp354c	0.805261
MGI:1201689	Tapbp	1.18813	MGI:2429955	Pgbd5	0.79704
MGI:99403	Adora2b	1.17786	MGI:1917195	Fndc4	0.823112
MGI:1915462	Tmbim4	1.24446	MGI:1890127	Plxnc1	0.782661
MGI:1339941	Cxcl15	1.20225	MGI:88449	Col15a1	0.796628
MGI:1858959	Elovl1	1.197	MGI:2652839	Zfp362	0.812222
MGI:96431	Cd79b	1.27582	MGI:2183453	Dlgap5	0.754294
MGI:109628	Dnase1l1	1.21075	MGI:109274	Trim28	0.808428
MGI:104809	Pls1	1.21195	MGI:1891740	Dact1	0.802297
MGI:1917723	Rapgef4	1.25354	MGI:2685821	Hjurp	0.731369
MGI:88233	C6	1.33998	MGI:1926465	Hnrnpm	0.784276
MGI:1096380	Psmb10	1.19804	MGI:1891692	Hnrnpr	0.811457
MGI:98107	Rps14	1.27376	MGI:88357	Cdk4	0.799486
MGI:1355324	Grb14	1.18798	MGI:2443349	Parm1	0.802268
MGI:1098718	Tmem38b	1.19577	MGI:96186	Hoxb5	0.802675
MGI:2442900	Tmcc3	1.23292	MGI:97290	Ndn	0.800838
MGI:1915025	Rtp4	1.26188	MGI:98180	Rrm1	0.732693
MGI:98822	Tfrc	1.26406	MGI:1098258	Kif15	0.784009
MGI:4422076	n-R5s211	1.28364	MGI:1298398	Mcm7	0.762843
MGI:894696	Serping1	1.18139	MGI:1916966	Trip13	0.76155
MGI:1919722	Slc16a10	1.18637	MGI:2147887	Armcx4	0.758728
MGI:1298407	Tspan7	1.18106	MGI:1355323	Slc7a8	0.769632
MGI:1915116	Wfdc1	1.28052	MGI:101947	Hnrnpd	0.786096
MGI:107617	Igkv19-93	1.22773	MGI:1347352	Hunk	0.797478
MGI:3528937	Gramd2	1.18975	MGI:103199	Mcm4	0.778424
MGI:97844	Rab3d	1.17861	MGI:1916060	Nexn	0.760306
MGI:2384877	Tmprss4	1.18656	MGI:1930197	Ncapg	0.757828
MGI:1316738	Igkj5	1.35261	MGI:104667	Hmmr	0.804853
MGI:109347	Lum	1.31798	MGI:1338802	Shcbp1	0.767611
MGI:107930	Pip5k1b	1.25424	MGI:1289298	Knstrn	0.769664
MGI:1340899	Chil1	1.36187	MGI:96777	Lgals1	0.762675
MGI:1890497	Plvap	1.25196	MGI:1918983	Susd2	0.796047
MGI:1330819	Osmr	1.2973	MGI:102784	Tgfb1i1	0.803888
MGI:2385885	BC028528	1.27492	MGI:1914666	Armcx2	0.808909
MGI:3698178	Fam174b	1.23324	MGI:3643448	Gm7931	0.769776
MGI:1346876	Map3k5	1.23293	MGI:1926321	Postn	0.79047
MGI:88223	C1qa	1.37494	MGI:1915277	Tmem178	0.79714
MGI:107704	Abcg1	1.30627	MGI:88407	Ckb	0.79472
MGI:1890216	Slc6a14	1.32737	MGI:2685054	Gpr161	0.811675
MGI:1925752	Tmem159	1.23457	MGI:97812	Ptprd	0.823516
MGI:109516	Sftpb	1.21586	MGI:2147658	Afap1l2	0.809721
MGI:88226	C2	1.24481	MGI:88329	Cd34	0.819685
MGI:3819494	Snora23	1.72547	MGI:1914391	Fbxo5	0.780397
MGI:2443248	Exph5	1.19052	MGI:894678	Aurka	0.781274
MGI:2652845	Cdc42bpg	1.27839	MGI:2444777	Ncaph	0.786487
MGI:1919154	Paqr7	1.26838	MGI:94900	Dlk1	0.754629
MGI:98852	Tst	1.26207	MGI:104566	Fgd1	0.823468
MGI:2443049	D230025D16Rik	1.20403	MGI:1347002	Angptl2	0.770456
MGI:95923	H2-DMb2	1.23561	MGI:2673002	Arhgef17	0.807133
MGI:3646284	Ighv1-12	1.50888	MGI:1915276	2810417H13Rik	0.722753
MGI:1933403	Erap1	1.2069	MGI:1306797	Aoc3	0.810553
MGI:1915130	Dcxr	1.20838	MGI:1914789	Dock6	0.802838
MGI:97004	Mme	1.26778	MGI:1915731	Mpzl1	0.831167
MGI:3045495	Tmem205	1.30401	MGI:1338010	Hic1	0.804387
MGI:109137	Rasgrf2	1.23037	MGI:96435	Igf2r	0.80716
MGI:1933177	Pik3ap1	1.24035	MGI:1890471	Pcbp4	0.834035
MGI:2139461	Tmem62	1.22627	MGI:1928098	Tspan3	0.815242
MGI:96882	Ly6c1	1.38325	MGI:1276539	Ttc3	0.811263
MGI:1913310	Cystm1	1.24764	MGI:106924	Melk	0.778152
MGI:1351481	Pdk4	1.40654	MGI:1930943	Rrad	0.796898
MGI:1890602	Gabarapl2	1.21393	MGI:1891925	Hnrnph1	0.789737
MGI:102890	Ccng1	1.22351	MGI:2179061	Plxna4	0.796362
MGI:98534	Tcn2	1.19405	MGI:894644	Cacnb2	0.784607
MGI:2138232	Colgalt2	1.23706	MGI:2676551	Plekhg1	0.807792
MGI:1914165	Myeov2	1.26141	MGI:109233	Kif22	0.784348
MGI:3650036	Gm13244	1.23958	MGI:1196294	Fubp1	0.806189
MGI:104696	Scnn1b	1.25677	MGI:105382	Lama5	0.790297
MGI:1924214	2610028H24Rik	1.24008	MGI:1923036	Ckap5	0.815996
MGI:1346527	Psmb8	1.22574	MGI:103198	Cdc25a	0.82861
MGI:105304	Il6ra	1.21151	MGI:1860267	Set	0.847763
MGI:2384841	Chpt1	1.21058	MGI:2443387	Zc3hav1l	0.810454
MGI:1339758	Csf1r	1.25798	MGI:1349165	Sdc2	0.778764
MGI:2681107	Siglec5	1.24434	MGI:2448399	Hist1h2bk	0.654612
MGI:2138162	Stk17b	1.28378	MGI:1346031	Tshz1	0.825817
MGI:2442367	Slc13a4	1.23725	MGI:1100881	Prss12	0.814046
MGI:1919139	Epn3	1.22284	MGI:99676	Adcy2	0.824092
MGI:1321390	Enpp2	1.25431	MGI:1914665	Fam115a	0.825509
MGI:1096574	Car4	1.27499	MGI:1201678	Cacna1g	0.838065
MGI:893575	Plscr1	1.24171	MGI:105923	Ednra	0.815477
MGI:93830	Adipor2	1.25354	MGI:96432	Igf1	0.764343
MGI:1343184	Samd9l	1.31562	MGI:1922667	Rspo2	0.719444
MGI:1919277	Slc39a4	1.33412	MGI:2684938	Prdm6	0.794941
MGI:107741	Pvr	1.23389	MGI:2177570	Tmem47	0.783825
MGI:1914097	Hint3	1.20153	MGI:88478	Cpa1	0.774724
MGI:5455590	Gm25813	2.09696	MGI:88351	Cdk1	0.735966
MGI:1354381	Tmprss2	1.20256	MGI:96909	Maf	0.835146
MGI:109442	Itga8	1.24794	MGI:1918780	Gas2l3	0.749607
MGI:1098699	Esyt3	1.27481	MGI:2443623	Raver2	0.814402
MGI:2153181	Hnmt	1.24352	MGI:2673709	Kntc1	0.806426
MGI:1914951	Wfdc2	1.35679	MGI:1916214	Ctc1	0.84056
MGI:103227	Cmah	1.20227	MGI:2676830	Mir145	0.72258
MGI:2387597	Gabrp	1.35301	MGI:2444576	Kif20b	0.768688
MGI:1914075	Rnf186	1.23184	MGI:1277214	Sept11	0.818681
MGI:1344390	Oasl2	1.2354	MGI:2443514	Wdhd1	0.832549
MGI:106498	D4Wsu53e	1.34907	MGI:1890948	Supt16	0.802743
MGI:1933754	Nedd4l	1.22437	MGI:2146046	Adamts12	0.787815
MGI:1914109	Slc16a9	1.23492	MGI:2183102	Sardh	0.81867
MGI:2685113	Macc1	1.26987	MGI:107914	Tia1	0.786269
MGI:1915776	Gpr155	1.22367	MGI:3039591	Mtss1l	0.778541
MGI:2149821	Hsd17b11	1.19025	MGI:1921357	Cep55	0.781004
MGI:88574	Cybb	1.33971	MGI:101934	Tfdp1	0.814504
MGI:5453022	Gm23245	1.60448	MGI:95566	Fn1	0.818895
MGI:2135589	Clec2d	1.39068	MGI:1197008	Wisp1	0.797401
MGI:99547	Iglc2	1.51455	MGI:97495	Pbx1	0.841332
MGI:2153249	AF251705	1.28345	MGI:1353644	Zfp503	0.82062
MGI:1351668	Abca8b	1.22636	MGI:99660	Pola1	0.809059
MGI:109603	Cmklr1	1.27755	MGI:1924093	Dtl	0.789469
MGI:1353611	Sc5d	1.23039	MGI:1919128	Fam83d	0.811119
MGI:1916439	1810033B17Rik	1.30977	MGI:108360	Enah	0.81476
MGI:104767	Gpx4	1.3264	MGI:102551	Ccnf	0.78186
MGI:3819952	Igkv1-135	1.42299	MGI:2442474	Dgkb	0.794018
MGI:2179722	Rassf3	1.2173	MGI:2183441	Psat1	0.792187
MGI:103295	Pon1	1.40682	MGI:1917418	Gprasp1	0.791811
MGI:1914980	Gabarapl1	1.26518	MGI:2384818	Mtss1	0.826396
MGI:107443	Fpr1	1.53814	MGI:1914427	Cdt1	0.817503
MGI:1920974	Mcee	1.19833	MGI:1330808	Hsd17b7	0.779708
MGI:109581	S100a13	1.19826	MGI:2144157	Usp22	0.843361
MGI:88022	Ang	1.44777	MGI:102541	Tbx5	0.800755
MGI:96417	Ids	1.25524	MGI:1915264	Zwilch	0.804811
MGI:90168	Dcaf11	1.20588	MGI:1100510	Bub1	0.749393
MGI:2441659	Lamp3	1.30616	MGI:1919787	Cdca2	0.823331
MGI:1330848	Atp8a1	1.22491	MGI:1913721	Anp32e	0.802479
MGI:1924546	Fam162b	1.24744	MGI:1338027	Gdf11	0.84617
MGI:104556	Cdkn1a	1.41377	MGI:1889642	Elp2	0.853947
MGI:1922715	Dynlrb2	1.27923	MGI:1924994	Bora	0.814829
MGI:106603	Serpinb9	1.29425	MGI:2448407	Hist1h2bn	0.775573
MGI:1328318	Atp6v0e	1.43865	MGI:1100874	Plagl1	0.830983
MGI:104695	Scnn1g	1.23493	MGI:1915548	Ncapd2	0.764734
MGI:1916910	Tmbim1	1.2075	MGI:1343489	Mpdz	0.812053
MGI:88225	C1qc	1.40406	MGI:1314881	Chaf1b	0.80104
MGI:107285	Ctsh	1.29067	MGI:1926421	Tcerg1	0.827996
MGI:1197515	Irx1	1.2765	MGI:1914199	Trim59	0.826056
MGI:2146322	Deptor	1.24667	MGI:1925384	Lpar4	0.829696
MGI:2443191	Nceh1	1.24	MGI:2157091	Ttyh2	0.810606
MGI:1913472	Serpinb1a	1.26034	MGI:107818	Mrc2	0.816199
MGI:1913857	Ms4a4d	1.3124	MGI:1916047	Pdgfrl	0.807892
MGI:2385729	Mgl2	1.61135	MGI:1916996	Znhit6	0.82044
MGI:107822	Ebp	1.20492	MGI:1196274	Cdca8	0.834767
MGI:88227	C3	1.48629	MGI:104717	Meis1	0.817078
MGI:109536	Itih4	1.39079	MGI:1858493	B4galt2	0.844043
MGI:97530	Pdgfra	1.30004	MGI:1918110	Sept10	0.835293
MGI:1915274	Hist1h2bc	1.32955	MGI:1923373	Gpsm2	0.81532
MGI:1100496	Fmo3	1.39399	MGI:1933623	Smarcd1	0.83041
MGI:1915654	Nrn1	1.24597	MGI:1921571	Tipin	0.80639
MGI:103297	Atp7b	1.36926	MGI:88355	Cdh2	0.809374
MGI:1888978	Ntn4	1.28448	MGI:2446979	Kif18b	0.819014
MGI:88224	C1qb	1.45207	MGI:1917722	Atad2	0.806728
MGI:3840155	Gm16332	1.36293	MGI:2444496	Prr11	0.835664
MGI:1928895	Isg20	1.26051	MGI:1338762	Fhl2	0.790032
MGI:2386607	Abca5	1.31737	MGI:95727	Gli1	0.846412
MGI:1921377	Krt80	1.27033	MGI:1920037	Ndc1	0.83228
MGI:1891834	Nupr1	1.27688	MGI:98763	Tk1	0.817813
MGI:104677	Man1a	1.29374	MGI:2448388	Hist1h2bj	0.743393
MGI:2442746	Slc43a2	1.27823	MGI:1920431	Nfatc4	0.824224
MGI:1923692	Slamf9	1.22195	MGI:88566	Ctxn1	0.844211
MGI:99782	Nt5e	1.3184	MGI:1931527	Hist1h1e	0.778037
MGI:88348	Cd9	1.27341	MGI:1925589	Ttyh3	0.832567
MGI:1927657	Ms4a8a	1.26063	MGI:1915146	Ccdc80	0.784654
MGI:5456270	Gm26493	1.84309	MGI:96433	Igf1r	0.816704
MGI:1349164	Sdc4	1.23668	MGI:1349453	Vsnl1	0.798474
MGI:894688	Serpinb6b	1.26403	MGI:1927470	Spag5	0.806117
MGI:109162	Gpam	1.22317	MGI:1919405	Cenpn	0.814371
MGI:88423	Clu	1.30134	MGI:1924356	Tmem181a	0.745931
MGI:1914103	Pnpla2	1.28579	MGI:106012	Tagln	0.81426
MGI:95479	Fabp1	1.25688	MGI:1343044	Rbmx	0.813025
MGI:4361141	Snora16a	1.93144	MGI:1859866	Cdc20	0.824908
MGI:1919643	Faim2	1.27547	MGI:2443160	Pag1	0.829129
MGI:1914939	Aldh3b1	1.24619	MGI:2385920	Dip2a	0.82948
MGI:99480	Cebpa	1.27199	MGI:1933825	Jam3	0.840916
MGI:2147043	Rmdn2	1.21401	MGI:1917487	Bhlhb9	0.838042
MGI:1098283	Per1	1.42998	MGI:1098767	Sgol2	0.825468
MGI:88456	Col4a5	1.25754	MGI:1919244	Cnn3	0.830848
MGI:1923930	5330417C22Rik	1.29869	MGI:96434	Igf2	0.774185
MGI:1261783	Fam49a	1.24368	MGI:94876	Ddc	0.832609
MGI:2143558	Chchd10	1.2675	MGI:101877	Tcf12	0.847148
MGI:2144095	Sec14l4	1.30313	MGI:1930187	Maged1	0.81405
MGI:1353494	Akr1b3	1.2976	MGI:104592	Myef2	0.809616
MGI:88321	Ms4a1	1.46902	MGI:1891209	Efemp2	0.834603
MGI:1914323	Pi4k2b	1.2472	MGI:1915099	Cdca5	0.831404
MGI:1924712	Tmem116	1.26578	MGI:98507	Tcf7	0.835433
MGI:96534	Cd74	1.41508	MGI:1329034	Ccne2	0.829964
MGI:1352498	Ndrg2	1.29934	MGI:88453	Col3a1	0.833108
MGI:88341	Cd53	1.69148	MGI:1346524	Sgcg	0.791438
MGI:1914797	Slc39a8	1.36215	MGI:1919736	Rnf219	0.843007
MGI:95802	Gpt	1.22413	MGI:1345150	Cdc6	0.845758
MGI:1924378	Crebrf	1.32706	MGI:1913390	Ska2	0.831033
MGI:5474850	Hbb-bt	1.62857	MGI:1354727	Smtn	0.828821
MGI:88594	Cyp27a1	1.23775	MGI:1923539	Phf14	0.834976
MGI:94872	Dcn	1.37177	MGI:1277171	Dcx	0.848643
MGI:1916943	Pof1b	1.30403	MGI:2443149	Gen1	0.832819
MGI:1333817	Slc22a3	1.29573	MGI:2144471	Tada2a	0.844517
MGI:99682	Tmbim6	1.21812	MGI:1915451	Ccdc34	0.851542
MGI:2385067	Lims2	1.3591	MGI:1196625	Fzd1	0.832998
MGI:3583960	D030056L22Rik	1.25305	MGI:95715	Gja4	0.82187
MGI:88339	Cd48	1.38215	MGI:2146813	Plekhh2	0.848395
MGI:1926952	Cyb5	1.33776	MGI:1097696	Rem1	0.833953
MGI:97796	Ptgfr	1.24856	MGI:109168	Fat1	0.821512
MGI:1916419	Faim3	1.26367	MGI:1917349	Smc4	0.816691
MGI:109365	Napsa	1.34639	MGI:2448297	Hist1h2ak	0.784262
MGI:1353586	Lmo7	1.30277	MGI:2448383	Hist1h2bf	0.793652
MGI:96965	Mertk	1.27618	MGI:1330294	Hnrnpab	0.861409
MGI:1889273	Fxyd1	1.31017	MGI:2147870	Lrch2	0.845283
MGI:1933830	Enpp5	1.25039	MGI:1922038	E2f8	0.823889
MGI:2137648	Ifi30	1.3693	MGI:1891221	Crtap	0.844773
MGI:1316737	G0s2	1.39628	MGI:2385261	Cnot3	0.843162
MGI:1917360	Ifi35	1.25306	MGI:1334444	Zfpm2	0.844262
MGI:1889385	Crebl2	1.27179	MGI:98297	Shh	0.83679
MGI:1100870	Gcnt2	1.25961	MGI:2154952	Ripk3	0.835943
MGI:106686	Pon3	1.261	MGI:2384875	Cdk5rap2	0.84518
MGI:1917188	Scrn1	1.23392	MGI:1917716	Ckap2l	0.807107
MGI:96438	Igfbp3	2.11965	MGI:1926810	Tmeff1	0.847895
MGI:1330223	Papss2	1.29949	MGI:1921681	Zfp558	0.877488
MGI:2429498	Gprc6a	1.41393	MGI:2445221	Cd109	0.840408
MGI:3819522	Snord16a	1.87467	MGI:1919822	Spats2	0.823522
MGI:95405	Ephx1	1.3152	MGI:893588	Cirbp	0.809985
MGI:1310002	Fmo1	1.29079	MGI:109359	Nek2	0.80974
MGI:1933155	Arl4d	1.31591	MGI:103300	Rbl1	0.834377
MGI:105383	Il18r1	1.34509	MGI:1347092	Zfp146	0.820206
MGI:104678	Tm4sf1	1.27378	MGI:2144727	Ddx1	0.849116
MGI:2384860	Slc44a3	1.25747	MGI:2142598	Slc7a6	0.845411
MGI:1860093	Stard10	1.28359	MGI:1914448	Spats2l	0.85888
MGI:97010	Mmp3	1.29561	MGI:1914184	Dsn1	0.841581
MGI:1889842	Fam13a	1.2844	MGI:1346870	Map2k6	0.844787
MGI:1923195	Tmem56	1.34867	MGI:108515	Cbx3	0.786602
MGI:1329012	Slc22a5	1.26939	MGI:1347487	Foxm1	0.804363
MGI:1858224	Chst3	1.29318	MGI:3705797	Gm14497	0.810102
MGI:2146559	AU021092	1.29754	MGI:3644007	Gm6485	0.756094
MGI:1921405	Errfi1	1.4282	MGI:97876	Rbp1	0.83419
MGI:1338917	S100a1	1.34741	MGI:3651787	Gm11847	0.723437
MGI:4439658	Ighj4	1.47688	MGI:2138628	Obsl1	0.862746
MGI:3617848	Sec14l3	1.30673	MGI:104793	Runx1t1	0.845861
MGI:2663511	Reps2	1.33339	MGI:1915862	Ube2c	0.810457
MGI:1315215	Dhrs3	1.27656	MGI:2449112	Adamts10	0.804181
MGI:1351469	Plekhb1	1.30133	MGI:1355299	Hnrnpdl	0.833217
MGI:1915703	Gpihbp1	1.3287	MGI:1097691	Hdac2	0.838426
MGI:95860	Gstm1	1.30869	MGI:1096340	E2f3	0.850141
MGI:87938	Adrb2	1.31258	MGI:1861942	Gtf2ird1	0.858638
MGI:2655562	Eltd1	1.29813	MGI:2144529	Cnot6	0.848935
MGI:107571	Cav2	1.41562	MGI:98284	Srsf2	0.82378
MGI:102896	Sult1a1	1.28218	MGI:104756	Itga9	0.796387
MGI:1932682	Cxcl16	1.3353	MGI:1921050	Tmtc4	0.847698
MGI:1916782	Hopx	1.35511	MGI:1919238	Esco2	0.852639
MGI:1336882	Vamp8	1.28775	MGI:1919905	Snhg5	0.809188
MGI:1933172	Chrdl1	1.25776	MGI:1917650	Adamdec1	0.731163
MGI:1202710	Art4	1.35182	MGI:3041225	Shisa3	0.802833
MGI:1927406	Herpud1	1.27122	MGI:1351614	Gyg	0.8411
MGI:1915678	Steap3	1.60074	MGI:101783	Plk4	0.842278
MGI:1931054	Slc43a3	1.24393	MGI:1298387	Fhl1	0.867042
MGI:88607	Cyp2e1	1.54412	MGI:1276574	Whsc1	0.832832
MGI:97798	Ptgs2	1.42288	MGI:2675669	Nusap1	0.83113
MGI:88235	C7	1.74865	MGI:2684931	Tbc1d31	0.841438
MGI:99554	Lgals3bp	1.35688	MGI:1931797	Ckap2	0.837916
MGI:1338761	Colq	1.40314	MGI:1913820	Cenpm	0.833117
MGI:1339968	Cth	1.2699	MGI:893579	Khdrbs1	0.85871
MGI:98976	Xlr	1.48456	MGI:1099460	Rbm3	0.821123
MGI:1915748	Tspan11	1.30409	MGI:1930140	Wdr6	0.844773
MGI:2387586	Tenc1	1.30683	MGI:1351328	Dbf4	0.830678
MGI:2655401	Scgb1c1	1.31853	MGI:2445082	Pamr1	0.806276
MGI:2673990	Vaultrc5	1.97747	MGI:2145099	Mis18bp1	0.819161
MGI:1333856	Klf9	1.32535	MGI:97357	Mycn	0.842818
MGI:88253	Car8	1.29537	MGI:1913945	Aspn	0.755158
MGI:1201692	Rabac1	1.3333	MGI:1926264	Tspan6	0.814317
MGI:1316692	Igkj4	1.55575	MGI:97009	Mmp2	0.84964
MGI:104773	Adra1a	1.44202	MGI:1891457	Polh	0.849212
MGI:106215	Aqp5	1.36349	MGI:3036282	Zfp532	0.835291
MGI:2443755	Rasgef1b	1.42563	MGI:1922647	Arhgap24	0.846004
MGI:3645893	Gm6166	1.49308	MGI:1098219	Hmgb3	0.846226
MGI:1355312	C1s	1.42925	MGI:1328362	Blm	0.853632
MGI:1923777	Il34	1.26977	MGI:1920960	Tubb2b	0.829679
MGI:98775	Tmod1	1.38787	MGI:1933391	Maged2	0.826421
MGI:1353451	Aldh3a1	1.26757	MGI:1923381	Depdc1a	0.830472
MGI:103222	Zbtb16	2.0127	MGI:1918335	Arhgap19	0.841382
MGI:88320	Cd2	1.30093	MGI:1914226	2410002F23Rik	0.84489
MGI:96240	Hspb1	1.56412	MGI:1920930	Zbtb8a	0.841401
MGI:1344373	Ubl3	1.24181	MGI:3694236	6820431F20Rik	0.817084
MGI:2143526	Gstt3	1.27859	MGI:105369	Cbx1	0.858304
MGI:1891341	Lpin2	1.34656	MGI:104819	Hnrnpa2b1	0.823069
MGI:1918770	Grap	1.31257	MGI:1922567	Parpbp	0.830725
MGI:2385825	Plekhb2	1.32281	MGI:1306785	Ugdh	0.838465
MGI:96897	Lyz2	1.29215	MGI:1277173	Arhgef25	0.837859
MGI:95856	Gsta3	1.40158	MGI:1927616	Trps1	0.824689
MGI:2444580	Tmem117	1.29634	MGI:1309480	Rtf1	0.856653
MGI:104528	S100g	1.48285	MGI:1919257	Fndc3b	0.851025
MGI:108020	Ear2	1.92814	MGI:2447762	Yeats2	0.84956
MGI:96211	Hp	1.50356	MGI:3039573	Ttll12	0.864252
MGI:88608	Cyp2f2	1.36282	MGI:894806	Mylk	0.839706
MGI:98239	Scd1	1.44723	MGI:97960	Rnps1	0.826121
MGI:2388029	Liph	1.3872	MGI:105388	Cdkn2c	0.84523
MGI:1928765	Scube2	1.44359	MGI:108177	Dhx9	0.842365
MGI:1931437	Smpdl3a	1.38552	MGI:1914709	Nvl	0.853929
MGI:1930150	Popdc2	1.3637	MGI:1913869	Atat1	0.862234
MGI:107187	Bcl6	1.3594	MGI:1927222	Diap3	0.821507
MGI:103181	Sod3	1.39029	MGI:3045258	Stard9	0.828871
MGI:104859	Selenbp2	1.34824	MGI:1194921	Ttk	0.822532
MGI:1926142	Crispld2	1.44718	MGI:2145661	Ankrd28	0.854401
MGI:1929988	Klf15	1.38192	MGI:97891	Rfc1	0.853559
MGI:1920932	Acer2	1.35013	MGI:1923389	Haus6	0.847286
MGI:104744	Kcnj2	1.38419	MGI:1858195	Hnrnpu	0.858236
MGI:1916823	Hilpda	1.37055	MGI:1925983	Troap	0.856384
MGI:894288	Sepp1	1.29449	MGI:1860374	Mad2l1	0.777975
MGI:2142763	Cyp4v3	1.38625	MGI:2443496	Sertad4	0.854478
MGI:1097156	Ptgis	1.37955	MGI:1934811	Nucks1	0.837591
MGI:2142610	Snx25	1.35479	MGI:1916831	Rhou	0.854782
MGI:1913850	Mgst1	1.52403	MGI:98287	Srsf5	0.803451
MGI:2146021	Mal2	1.36438	MGI:1924828	Bcl9	0.843948
MGI:103573	Cebpd	1.55422	MGI:1101355	Ltbp3	0.819612
MGI:103225	Cyp4b1	1.57897	MGI:2441950	Lphn3	0.836756
MGI:1921590	Ahcyl2	1.44357	MGI:102682	Llgl1	0.860381
MGI:107899	Cd36	1.3857	MGI:2147003	Arhgap28	0.831335
MGI:2183535	Cytip	1.42151	MGI:88549	Csrp1	0.873631
MGI:109518	Sftpa1	1.30589	MGI:1923957	Clasp1	0.870757
MGI:3781032	Kcnj13	1.39657	MGI:1924315	Ints7	0.858666
MGI:95895	H2-Aa	1.63482	MGI:99240	Ddx39b	0.858122
MGI:1915912	Scgb3a1	1.74592	MGI:2448350	Hist1h3i	0.786597
MGI:1098776	Lbp	1.42785	MGI:97531	Pdgfrb	0.838677
MGI:5000466	Anpep	1.46373	MGI:1261827	Dnmt3a	0.858511
MGI:2442495	Agmo	1.55049	MGI:1913765	Cul7	0.85614
MGI:2138143	AA986860	1.4809	MGI:1355328	Nasp	0.841148
MGI:95808	Gria1	1.48831	MGI:2442925	Atad5	0.864055
MGI:88222	Tspo	1.43004	MGI:2151114	Dgcr8	0.862257
MGI:98731	Tgm2	1.42521	MGI:1861727	Dkc1	0.858325
MGI:103070	H2-Ab1	1.60945	MGI:1916969	Cad	0.848541
MGI:95901	H2-Eb1	1.77301	MGI:1919665	Sgol1	0.851811
MGI:87989	Alas1	1.37471	MGI:1858306	Srpx	0.817687
MGI:1914145	Pxdc1	1.58569	MGI:1277150	Ldlrad4	0.858186
MGI:2157942	Cd209a	1.47133	MGI:2444926	Ckap4	0.856287
MGI:107671	Gpm6a	1.48429	MGI:1919784	Rcc2	0.870798
MGI:96763	Ldhb	1.38818	MGI:106913	Abi2	0.866144
MGI:2685837	Mettl21e	1.58456	MGI:88181	Bmp5	0.827409
MGI:88108	Atp1b1	1.37465	MGI:1858330	Nxf1	0.852921
MGI:96495	Igkc	1.63327	MGI:1344332	Wif1	0.776123
MGI:1194503	Atp2a3	1.43034	MGI:1914715	Sf3a1	0.862215
MGI:894320	Prdx6	1.4136	MGI:1196223	D8Ertd82e	0.683315
MGI:107776	Gadd45b	1.46771	MGI:1920423	Pcdh18	0.793755
MGI:104651	Cd82	1.42481	MGI:2137495	Myocd	0.849545
MGI:1921371	Acoxl	1.57869	MGI:1859547	Syt11	0.844595
MGI:1316689	Igkj1	1.64459	MGI:1915315	Rhno1	0.86235
MGI:1888514	Cxcl14	1.98994	MGI:894657	Serpinb8	0.857657
MGI:108021	Ear1	1.99102	MGI:1858222	Sept9	0.863565
MGI:2147706	AW112010	1.89283	MGI:1920018	Topbp1	0.850397
MGI:1339998	Efemp1	1.4736	MGI:1351663	Skp2	0.853961
MGI:1270860	Plscr2	1.51079	MGI:2449568	Morn4	0.798781
MGI:1923000	Slc10a6	1.74942	MGI:104748	Peg3	0.829166
MGI:1916523	Mettl7a1	1.56198	MGI:1914338	Cand2	0.873052
MGI:1328326	Wisp2	1.5622	MGI:107717	Myh9	0.858626
MGI:1919611	Ces2g	1.44184	MGI:2444022	Mapk1ip1l	0.869151
MGI:1353450	Aldh1a1	1.54864	MGI:1916925	Pxdn	0.833373
MGI:1196284	Tsc22d3	1.55971	MGI:1344403	Cfdp1	0.846753
MGI:98249	Scn3a	1.63363	MGI:1926048	Eml4	0.861959
MGI:1341803	Lipg	1.42002	MGI:2149481	Cygb	0.856518
MGI:96976	Mgp	1.63935	MGI:2147897	Cenpi	0.853642
MGI:96825	Selenbp1	1.47898	MGI:99960	Ewsr1	0.862252
MGI:1926217	Rnase4	1.5481	MGI:106645	Enpep	0.807329
MGI:109278	Ogn	1.78233	MGI:1860513	Fnbp4	0.852257
MGI:2151110	Prelp	1.75766	MGI:1332240	Heph	0.853878
MGI:109515	Sftpd	1.52276	MGI:1918248	Phf6	0.869103
MGI:2386846	Abca8a	1.73557	MGI:2444418	Scara3	0.87906
MGI:105045	Serpina3n	3.13594	MGI:1929264	Sae1	0.837097
MGI:98973	Xdh	1.68378	MGI:1338073	Cdc45	0.854164
MGI:88385	Cfh	1.77266	MGI:2442836	Brip1	0.862536
MGI:1918974	Aox3	1.65389	MGI:1933196	Rad54l2	0.874994
MGI:101782	Scnn1a	1.51711	MGI:2142989	Ncapd3	0.8497
MGI:102848	Serpina3c	1.64823	MGI:1289341	Sf3b3	0.878338
MGI:2157910	Mlc1	1.4969	MGI:3651584	Gm12986	0.822112
MGI:105925	Cdo1	1.7714	MGI:2443472	Atf7	0.871746
MGI:95851	Gsn	1.63212	MGI:1933184	Nop58	0.839653
MGI:96441	Igfbp6	1.87985	MGI:98810	Tpm2	0.843946
MGI:1923727	Pcolce2	1.68784	MGI:2448425	Hist1h4f	0.794385
MGI:88598	Cyp2b10	3.09152	MGI:106196	Stfa3	0.735523
MGI:88057	Apoe	1.69292	MGI:2448300	Hist1h2an	0.781361
MGI:1925044	Adamtsl2	1.93146	MGI:2443257	F830001A07Rik	0.784067
MGI:1916776	Fmo2	2.04293	MGI:1916788	Antxr1	0.855804
MGI:102963	Inmt	3.05863	MGI:98510	Tcf3	0.869028
MGI:1918988	Mamdc2	1.91548	MGI:1339795	Smc3	0.839796
MGI:103562	Hsd11b1	1.87677	MGI:1096361	Hn1	0.843534
MGI:94917	Dpep1	2.15532	MGI:97281	Ncam1	0.868498
MGI:105102	Gpx3	2.56535	MGI:1891421	Mesdc2	0.869206
			MGI:1924223	Fbxo21	0.876027
			MGI:1925177	Ccdc88a	0.844985
			MGI:1916513	Rfc3	0.866044
			MGI:894762	Ldb1	0.859098
			MGI:1915031	Ilf2	0.867835
			MGI:1917786	Qpct	0.802631
			MGI:97791	Ptbp1	0.862961

## Sheet: ALV4vsMAT
UPREGULATED			DOWNREGULATED
MGI_ID	Symbol	FoldChange	MGI_ID	Symbol	FoldChange
MGI:1923810	Prss8	1.2458	MGI:3588195	Adamts17	0.386132
MGI:1913590	Psenen	1.27683	MGI:88490	Crabp1	0.327645
MGI:88554	Ctla2a	1.31387	MGI:2146046	Adamts12	0.458649
MGI:97622	Pln	1.29492	MGI:95488	Fbln2	0.631721
MGI:97142	Mrc1	1.25989	MGI:87963	Agt	0.334562
MGI:95861	Gstm2	1.20797	MGI:95490	Fbn2	0.618182
MGI:88047	Aplp2	1.11313	MGI:1921436	Ccdc3	0.48018
MGI:3643693	Gm8054	1.45694	MGI:101922	Tnc	0.291246
MGI:2442832	Osbpl2	1.15785	MGI:1913945	Aspn	0.295417
MGI:3590652	Txlng	1.21195	MGI:106198	Stfa1	0.287881
MGI:107450	Dld	1.15392	MGI:98738	Thbs2	0.395089
MGI:1915932	Slc44a2	1.13799	MGI:99502	Ltbp2	0.384586
MGI:1918101	Tbc1d8b	1.16385	MGI:1298229	Nid2	0.644419
MGI:2444530	Slc9a7	1.14478	MGI:1346086	Aplnr	0.631092
MGI:1194490	Diap1	1.13861	MGI:2684924	Pcdh17	0.570579
MGI:1931054	Slc43a3	1.20586	MGI:2670972	Frem1	0.471268
MGI:1915433	Bcas2	1.10714	MGI:1925589	Ttyh3	0.677595
MGI:95934	H2-Q5	1.27298	MGI:2444800	Prss35	0.339511
MGI:103286	Atp6v0a1	1.18023	MGI:88457	Col5a1	0.68005
MGI:2138302	AI607873	1.24198	MGI:1298387	Fhl1	0.731137
MGI:2176882	Tlr7	1.17805	MGI:2388073	Camk1g	0.651569
MGI:2385621	Nup153	1.11534	MGI:97009	Mmp2	0.585313
MGI:1919139	Epn3	1.22227	MGI:95566	Fn1	0.515346
MGI:2384853	Tapbpl	1.17303	MGI:96949	Mdk	0.492827
MGI:95309	Eif5	1.1408	MGI:101900	Mmp14	0.582662
MGI:1914238	Lap3	1.16225	MGI:103232	Grb10	0.58659
MGI:1355335	Tmod2	1.15092	MGI:88176	Bmp1	0.619439
MGI:95791	Got1	1.17204	MGI:104748	Peg3	0.578059
MGI:1917188	Scrn1	1.17834	MGI:88468	Col1a2	0.548367
MGI:106008	Anxa5	1.16797	MGI:2145236	Lhfpl2	0.582902
MGI:894695	Galnt3	1.13592	MGI:1315205	Slit2	0.524685
MGI:2387100	Dusp7	1.20484	MGI:95317	Eln	0.36806
MGI:1917326	Esrp1	1.13247	MGI:1916925	Pxdn	0.64118
MGI:1328326	Wisp2	1.36947	MGI:96439	Igfbp4	0.645288
MGI:107700	Casp4	1.17271	MGI:2137913	Loxl2	0.579132
MGI:102709	Cav1	1.12147	MGI:102793	Fstl1	0.488961
MGI:2140279	Tdrd7	1.10845	MGI:99444	Nrep	0.472926
MGI:98754	Timp3	1.35419	MGI:88453	Col3a1	0.532128
MGI:1914736	Polr3g	1.10802	MGI:1931838	Dbn1	0.633813
MGI:1913670	Polr2e	1.13204	MGI:2449112	Adamts10	0.636347
MGI:1354381	Tmprss2	1.16395	MGI:1928765	Scube2	0.571212
MGI:88574	Cybb	1.24222	MGI:1352745	Fscn1	0.569666
MGI:107928	Aldh1a2	1.21331	MGI:88461	Col6a3	0.481714
MGI:2442940	Slc41a2	1.19788	MGI:88460	Col6a2	0.594348
MGI:1891250	Gprc5a	1.12779	MGI:1347356	Adamts2	0.6153
MGI:104597	Tnnt2	1.28487	MGI:88478	Cpa1	0.73413
MGI:2447167	Cmtm8	1.17873	MGI:102889	Vcan	0.532397
MGI:1915038	Sfr1	1.1369	MGI:2448350	Hist1h3i	0.544369
MGI:2384561	Nae1	1.16913	MGI:95489	Fbn1	0.532816
MGI:1921636	Rmi1	1.16427	MGI:2155705	P2ry14	0.419973
MGI:1923692	Slamf9	1.14491	MGI:1925810	Gpr124	0.642922
MGI:105925	Cdo1	1.35493	MGI:1925044	Adamtsl2	0.568082
MGI:1913393	Eef1e1	1.19557	MGI:1926189	Emilin1	0.702476
MGI:2178076	Pla2g15	1.16684	MGI:1100850	Capn6	0.552971
MGI:98249	Scn3a	1.39919	MGI:98366	Sox4	0.606248
MGI:2153072	Trim37	1.13136	MGI:2444961	Dennd2a	0.694763
MGI:108046	Laptm5	1.24324	MGI:1341847	Hhip	0.569041
MGI:1916943	Pof1b	1.21316	MGI:1915731	Mpzl1	0.669995
MGI:1098726	Emp2	1.10973	MGI:96968	Mest	0.453444
MGI:1924834	Spidr	1.09591	MGI:1097159	Neo1	0.720404
MGI:1330848	Atp8a1	1.15015	MGI:97815	Ptprs	0.640759
MGI:95745	Hagh	1.19031	MGI:1340030	Crlf1	0.715963
MGI:1339977	Agtrap	1.19701	MGI:1914466	Mboat2	0.64747
MGI:102772	Gbp2	1.2835	MGI:2444049	P4ha3	0.653562
MGI:98797	Tpi1	1.15465	MGI:88458	Col5a2	0.628461
MGI:1921441	P2ry13	1.18343	MGI:2143537	Tmem26	0.722291
MGI:1914989	Slc48a1	1.18124	MGI:2442062	Sh3pxd2b	0.686312
MGI:5434295	Gm20939	1.22307	MGI:2685047	Hmcn1	0.570508
MGI:1915500	Fam96a	1.1552	MGI:88467	Col1a1	0.521238
MGI:1197012	Aebp1	1.18529	MGI:2385368	Fras1	0.635093
MGI:93882	Lrrc32	1.27154	MGI:88454	Col4a1	0.606438
MGI:1097711	Degs1	1.13195	MGI:1928478	Brinp1	0.72389
MGI:105988	Adam28	1.31498	MGI:88459	Col6a1	0.659675
MGI:1918834	Gdpd2	1.36625	MGI:98494	Tbx2	0.679877
MGI:2449205	Nr1d2	1.53359	MGI:104769	Fkbp10	0.606063
MGI:102780	Six1	1.13217	MGI:2146149	Egflam	0.670721
MGI:1923310	Isy1	1.14356	MGI:2443310	Olfml2b	0.629114
MGI:700013	Sorbs3	1.2308	MGI:99559	Mfap2	0.619134
MGI:1924183	Ifi27l2a	1.3163	MGI:3036230	Slc27a6	0.537868
MGI:99951	Mafk	1.31625	MGI:109321	Lama4	0.643403
MGI:104602	Prpf39	1.21115	MGI:99914	Lamc1	0.60602
MGI:2442720	Tor4a	1.1361	MGI:1928392	Dpt	0.650227
MGI:1859631	Pdgfc	1.11356	MGI:107818	Mrc2	0.617144
MGI:1914455	Utp11l	1.14609	MGI:1101355	Ltbp3	0.701533
MGI:95286	Eed	1.15288	MGI:94906	Dmpk	0.732098
MGI:1858225	Tuba8	1.25122	MGI:107489	Phex	0.521288
MGI:1918320	Mbip	1.15781	MGI:1342276	Mfap4	0.637625
MGI:1921846	Cds1	1.17149	MGI:104902	Gpc4	0.666372
MGI:88320	Cd2	1.21957	MGI:105378	Adam12	0.725004
MGI:1929988	Klf15	1.41274	MGI:1916788	Antxr1	0.660903
MGI:1928137	Mrps22	1.11367	MGI:1916509	Kctd5	0.741018
MGI:1921164	Irak3	1.1359	MGI:1913425	Mustn1	0.629181
MGI:1888978	Ntn4	1.15289	MGI:1354952	Dkk3	0.664918
MGI:97175	Map2	1.35801	MGI:1347002	Angptl2	0.617773
MGI:1354696	Fbxo8	1.1415	MGI:1920546	Rhobtb3	0.729383
MGI:2385071	Etf1	1.1565	MGI:97531	Pdgfrb	0.645045
MGI:1915751	Nsmce2	1.17831	MGI:1918711	Ptk7	0.73819
MGI:2442485	Myo5c	1.17865	MGI:1349645	Islr	0.544172
MGI:103178	Vegfa	1.17406	MGI:2682940	Gxylt2	0.741335
MGI:1915571	0610007P14Rik	1.18285	MGI:1315204	Slc40a1	0.677493
MGI:107539	Klrb1b	1.25698	MGI:1917754	Galnt16	0.727949
MGI:1913310	Cystm1	1.19059	MGI:1347352	Hunk	0.721445
MGI:1919671	Ttc30b	1.16268	MGI:3039591	Mtss1l	0.674359
MGI:1921372	Tmem43	1.18405	MGI:96743	Lamb1	0.663957
MGI:1920722	Spata18	1.21814	MGI:94852	Oaf	0.774954
MGI:1924488	Nipal2	1.1839	MGI:103307	Cacnb3	0.760071
MGI:1344390	Oasl2	1.24183	MGI:2443160	Pag1	0.723286
MGI:106612	Myo1c	1.13346	MGI:1346342	Clca3	0.232782
MGI:1929507	Arl6ip6	1.17449	MGI:96109	Hlx	0.674595
MGI:99828	Slc7a2	1.18957	MGI:2145953	Kdelr3	0.541536
MGI:109611	Dsp	1.2374	MGI:1916157	Gpr153	0.759329
MGI:1919638	Ripk4	1.2158	MGI:2147658	Afap1l2	0.72893
MGI:1914878	Anp32b	1.15825	MGI:88455	Col4a2	0.639288
MGI:1919132	Serinc2	1.18758	MGI:1353468	Adamts8	0.794022
MGI:1917870	Ube2v2	1.17858	MGI:98958	Wnt5a	0.490823
MGI:1309517	Itm2b	1.11543	MGI:104720	Hsd11b2	0.78593
MGI:2145458	Akr1c14	2.00081	MGI:1916960	Arap1	0.794971
MGI:1914488	Fam220a	1.39308	MGI:1346091	Fbln5	0.711158
MGI:2674939	Podn	1.20427	MGI:104716	Nnat	0.684536
MGI:96763	Ldhb	1.32129	MGI:1332240	Heph	0.7507
MGI:2442524	Heatr1	1.13289	MGI:109497	Gata5	0.712684
MGI:1891258	Parp3	1.15185	MGI:2685723	Ccnjl	0.772174
MGI:3702467	Sp140	1.26474	MGI:1890359	Igf2bp3	0.817364
MGI:2155865	Rrm2b	1.18205	MGI:99217	Cdh11	0.671052
MGI:2385030	Krt79	1.53116	MGI:3513977	Apcdd1	0.730292
MGI:1916776	Fmo2	1.27654	MGI:105382	Lama5	0.662858
MGI:96298	Hyal1	1.23133	MGI:894644	Cacnb2	0.714519
MGI:1100500	Flot1	1.13939	MGI:107941	Emp1	0.705651
MGI:1914295	Riok2	1.18172	MGI:3045256	Fat4	0.71858
MGI:3840155	Gm16332	1.24281	MGI:1274781	Robo1	0.717833
MGI:2659021	Phactr1	1.14147	MGI:2135272	Vangl2	0.779973
MGI:1919451	Otud6b	1.19622	MGI:2139667	Dpyd	0.732013
MGI:1201779	Hnrnph2	1.20012	MGI:2670995	Trp53i11	0.757235
MGI:1333804	Vbp1	1.23095	MGI:1098693	Tet1	0.736393
MGI:3580629	Ugt1a6b	1.26478	MGI:1924880	Prdm8	0.641512
MGI:1333743	Mpeg1	1.4345	MGI:1890564	Rcan1	0.688481
MGI:2448587	Ccdc153	1.28233	MGI:1891160	Chst2	0.694465
MGI:1855693	Nap1l1	1.15865	MGI:103029	Mdk-ps1	0.723418
MGI:1913618	Rtca	1.1546	MGI:1861461	Hist1h1b	0.578711
MGI:1913440	Acer3	1.21103	MGI:106096	Loxl1	0.663584
MGI:88270	Car3	1.88349	MGI:88329	Cd34	0.719857
MGI:1914729	Tmem183a	1.12791	MGI:99676	Adcy2	0.762823
MGI:106393	Tspyl4	1.2063	MGI:1916047	Pdgfrl	0.759103
MGI:1919230	Utp3	1.15286	MGI:99959	Tgfbi	0.410272
MGI:1921575	Cltb	1.19348	MGI:1914666	Armcx2	0.756159
MGI:104556	Cdkn1a	1.57222	MGI:103013	Cacna1c	0.739566
MGI:96619	Itih2	1.11669	MGI:1095412	Unc5c	0.752465
MGI:3041256	Fam107a	1.48934	MGI:88351	Cdk1	0.666644
MGI:1914413	Ccdc47	1.21976	MGI:97297	Nedd4	0.780535
MGI:2442784	Slco4c1	1.29668	MGI:88607	Cyp2e1	0.629837
MGI:1920274	Emc7	1.16272	MGI:2138628	Obsl1	0.811211
MGI:2449975	Iqgap2	1.18985	MGI:2685011	Dchs1	0.739204
MGI:1919729	Hsdl2	1.16778	MGI:1918252	Mex3b	0.749579
MGI:2444594	Slc26a9	1.2838	MGI:97143	Marcksl1	0.611298
MGI:1338056	Klf5	1.16711	MGI:2147810	Tmem132a	0.785828
MGI:1926004	Galnt15	1.81968	MGI:1918001	6330403K07Rik	0.640486
MGI:104741	Nfkbia	1.2251	MGI:97342	Nid1	0.649163
MGI:1336885	Cd84	1.25603	MGI:1328364	Fmod	0.762717
MGI:1915462	Tmbim4	1.15956	MGI:1922855	Kdm5b	0.782217
MGI:1922850	Calml4	1.15067	MGI:1926562	Gucy1a3	0.739469
MGI:95283	Edn1	1.41009	MGI:1922990	Egfem1	0.40436
MGI:1918180	Nol8	1.19856	MGI:1889508	Tbc1d1	0.766568
MGI:1915051	Pllp	1.16514	MGI:1923724	Spon2	0.521368
MGI:2685362	Fam83b	1.1469	MGI:88451	Col18a1	0.791909
MGI:1096867	Etv5	1.19498	MGI:97751	Ppic	0.729089
MGI:1349420	Sh2d1b1	1.32309	MGI:1334444	Zfpm2	0.801342
MGI:2138828	Eps8l2	1.26267	MGI:1352474	Tnfrsf19	0.712201
MGI:3026924	Fam84b	1.18292	MGI:2183102	Sardh	0.759503
MGI:87867	Acadm	1.13465	MGI:2445082	Pamr1	0.69304
MGI:2442042	Dpep2	1.14101	MGI:3051647	Pappa2	0.665169
MGI:1859553	Lrrc6	1.1575	MGI:87997	Alox15	0.420374
MGI:2654703	Otud7b	1.31834	MGI:2442764	Smtnl2	0.672322
MGI:1929699	Arl3	1.17076	MGI:2683536	Klhl23	0.780984
MGI:1927237	Cgn	1.18252	MGI:1337004	Loxl3	0.76638
MGI:1201374	Anxa8	1.2385	MGI:2444926	Ckap4	0.777977
MGI:1920551	Ttc29	1.18077	MGI:1921771	Ppp4r4	0.752822
MGI:2442367	Slc13a4	1.39043	MGI:102784	Tgfb1i1	0.752769
MGI:1913742	Zmat2	1.21109	MGI:88449	Col15a1	0.793289
MGI:1929721	Rrs1	1.16943	MGI:97812	Ptprd	0.692474
MGI:1330806	Arg2	1.2392	MGI:102556	Tbx4	0.696408
MGI:1919110	Wdr16	1.21481	MGI:2664902	Mark1	0.726525
MGI:1916439	1810033B17Rik	1.24767	MGI:2444314	Fat3	0.721138
MGI:97857	Rarb	1.19141	MGI:2385920	Dip2a	0.795044
MGI:1860078	Txnl1	1.14578	MGI:95525	Fgfr4	0.680186
MGI:87931	Cfd	1.43303	MGI:3045323	Trim67	0.734129
MGI:2183153	Pkhd1l1	1.22675	MGI:2685195	Zbtb34	0.761758
MGI:1338788	Pex11a	1.18741	MGI:88293	Cacna1d	0.756798
MGI:104677	Man1a	1.20287	MGI:2448316	Hist2h2ac	0.720599
MGI:1916487	Gtpbp4	1.20764	MGI:1347346	Adamts7	0.80641
MGI:104859	Selenbp2	1.35338	MGI:97370	Enpp1	0.659429
MGI:97171	Mt1	1.35419	MGI:2443629	9930013L23Rik	0.704207
MGI:3649253	Gm13233	1.25428	MGI:1918794	Arhgap42	0.696478
MGI:99668	Siglec1	1.21165	MGI:96603	Itga4	0.722154
MGI:1926209	Dek	1.17781	MGI:1261827	Dnmt3a	0.720438
MGI:103266	Fgl2	1.22576	MGI:101948	Wnt11	0.658688
MGI:1277973	Thumpd3	1.16718	MGI:1354727	Smtn	0.742721
MGI:104574	Ptprj	1.17447	MGI:2429955	Pgbd5	0.789708
MGI:2443100	Bend7	1.16337	MGI:104566	Fgd1	0.813723
MGI:106183	Ocln	1.18117	MGI:1926321	Postn	0.689272
MGI:2445154	Lrrn4	1.31811	MGI:1933157	Pdzrn3	0.749826
MGI:1918940	Esm1	1.33981	MGI:87961	Agrn	0.724204
MGI:96245	Hspa9	1.17605	MGI:2443787	Rnf152	0.817151
MGI:1918448	Otud1	1.16176	MGI:2157091	Ttyh2	0.759528
MGI:109297	Slpi	1.26391	MGI:97801	Pth1r	0.782124
MGI:1919131	Apmap	1.13586	MGI:104904	Tead2	0.784696
MGI:1928401	Clip1	1.23105	MGI:97008	Mmp11	0.739402
MGI:1915130	Dcxr	1.22671	MGI:1920423	Pcdh18	0.666022
MGI:1924143	Cers2	1.16133	MGI:95455	Ets1	0.807455
MGI:109490	Sms	1.19722	MGI:2448326	Hist1h3e	0.605468
MGI:1917275	Acot7	1.31435	MGI:2673002	Arhgef17	0.762914
MGI:98325	Smpd1	1.17475	MGI:87921	Adh1	0.660428
MGI:104814	Ier3	1.33713	MGI:2445221	Cd109	0.857682
MGI:1922813	Dnali1	1.20658	MGI:96600	Itga2	0.71419
MGI:96159	Hmgcr	1.15902	MGI:1890127	Plxnc1	0.726818
MGI:96897	Lyz2	1.18206	MGI:1098434	Rgs5	0.595085
MGI:2442058	Nipa1	1.28424	MGI:1855700	Pcdh12	0.787281
MGI:2179715	Pla2g16	1.22596	MGI:2148066	Slc38a5	0.630566
MGI:1921405	Errfi1	1.28976	MGI:1202715	Tcf21	0.691165
MGI:1278319	Fpr2	1.47762	MGI:101780	Serpine2	0.590287
MGI:106498	D4Wsu53e	1.29011	MGI:95891	H19	0.4893
MGI:1923173	Dnttip2	1.14805	MGI:2444465	Frem2	0.831285
MGI:1352507	Rabgap1l	1.1388	MGI:1917695	Cd248	0.730989
MGI:1919293	Sulf2	1.17305	MGI:2154244	Plxnd1	0.729615
MGI:2384307	Rassf9	1.19826	MGI:2448295	Hist1h2ah	0.695691
MGI:96240	Hspb1	1.6458	MGI:2443061	Tmem132c	0.70301
MGI:1915291	Mid1ip1	1.17611	MGI:1914399	Nkain1	0.793271
MGI:107815	Pfkfb2	1.25242	MGI:1933966	Mcam	0.747925
MGI:105053	Hsph1	1.53469	MGI:88355	Cdh2	0.741728
MGI:1270839	Cacybp	1.21566	MGI:1351614	Gyg	0.673379
MGI:109567	Wbp5	1.19986	MGI:1341272	Col14a1	0.701449
MGI:1927638	Dnaja4	1.19328	MGI:102965	Scn7a	0.66899
MGI:1917363	Odf3b	1.20371	MGI:95522	Fgfr1	0.766969
MGI:3647196	Lilra5	1.3711	MGI:1929897	Clstn2	0.732691
MGI:2143163	Mapkapk3	1.16005	MGI:1099792	Ptpn4	0.768698
MGI:1923258	Nabp1	1.23629	MGI:99906	Tie1	0.781645
MGI:1921506	Cyld	1.21232	MGI:2443198	Slitrk6	0.720249
MGI:1927498	Rgs18	1.75447	MGI:1915905	Fndc1	0.66391
MGI:1915326	Dnajc9	1.13051	MGI:88407	Ckb	0.726765
MGI:109284	Psen2	1.15459	MGI:1934659	Pi15	0.632381
MGI:1355315	Tmod3	1.13085	MGI:2443623	Raver2	0.751767
MGI:108052	Bcl2l2	1.19169	MGI:1195462	Gfra2	0.729734
MGI:95794	Lrp2	1.36253	MGI:1344332	Wif1	0.667145
MGI:1201785	Fxyd5	1.20644	MGI:1919890	Mex3a	0.836473
MGI:1919448	Skiv2l2	1.18814	MGI:2684938	Prdm6	0.780064
MGI:97043	Me1	1.22072	MGI:2448320	Hist1h3c	0.705948
MGI:2384789	Tmem63a	1.18103	MGI:97855	Rap2a	0.799536
MGI:107417	Slc50a1	1.18116	MGI:1860055	Panx1	0.830441
MGI:102683	Grb7	1.23474	MGI:2148811	Npnt	0.74837
MGI:1916579	1700003M02Rik	1.23988	MGI:1859016	Ddah2	0.731494
MGI:1349457	Serinc3	1.22896	MGI:96777	Lgals1	0.617437
MGI:2684917	Vcpkmt	1.15336	MGI:96795	Lmnb1	0.761248
MGI:105068	Rab7	1.12219	MGI:2141861	Ap2s1	0.765242
MGI:96820	Lpl	1.41703	MGI:1918781	Piezo2	0.725462
MGI:1920635	Fam177a	1.29137	MGI:1924967	6030408B16Rik	0.778467
MGI:1889842	Fam13a	1.30526	MGI:107304	Rny3	0.674961
MGI:95906	H2-K2	1.21268	MGI:1197008	Wisp1	0.720863
MGI:1888514	Cxcl14	1.63016	MGI:104750	Nrcam	0.670833
MGI:2385017	Nrbp2	1.24131	MGI:1202394	Gif	0.836176
MGI:109544	Aim1	1.13526	MGI:1917271	Nt5dc2	0.718144
MGI:106013	Slc16a1	1.18601	MGI:1920431	Nfatc4	0.812353
MGI:88038	Fabp4	1.44795	MGI:1345144	Spry4	0.69819
MGI:1349419	Aifm1	1.21004	MGI:2679008	Fhod1	0.812955
MGI:2684972	Fhdc1	1.23355	MGI:2448425	Hist1h4f	0.683258
MGI:1913520	Fam134b	1.26424	MGI:1346524	Sgcg	0.800101
MGI:2661430	Kbtbd8	1.12515	MGI:104616	Ccr3	0.589952
MGI:1270855	Il16	1.13394	MGI:2444777	Ncaph	0.777786
MGI:1929269	Tmed2	1.26744	MGI:5477292	Gm26798	0.666844
MGI:2679007	Elmo3	1.16358	MGI:1860511	Heyl	0.786972
MGI:104591	Nbl1	1.22563	MGI:1933397	Fcrls	0.725558
MGI:109326	Bnip3	1.29312	MGI:1097696	Rem1	0.787913
MGI:1913760	Rnf181	1.17364	MGI:2651499	Pde5a	0.695648
MGI:1914339	Psmc6	1.28134	MGI:1919164	Antxr2	0.724062
MGI:1098551	Clk4	1.30259	MGI:1919583	Palld	0.769085
MGI:103257	Inpp5b	1.18301	MGI:2448404	Hist1h2bm	0.705535
MGI:2442551	Lactb2	1.20782	MGI:108075	Smo	0.811505
MGI:107571	Cav2	1.20502	MGI:1096393	Snai2	0.695656
MGI:1914980	Gabarapl1	1.3178	MGI:104687	Col4a4	0.758908
MGI:1344373	Ubl3	1.14447	MGI:2385228	Tmem119	0.731353
MGI:2182928	Gpr116	1.18011	MGI:1298205	Slc7a5	0.826648
MGI:2684916	Ppp1r36	1.20865	MGI:96177	Hoxa5	0.787694
MGI:102896	Sult1a1	1.40444	MGI:1278332	Bcl6b	0.710106
MGI:109578	Taf1a	1.18292	MGI:1915299	Tgif2	0.811376
MGI:1917777	Stambp	1.14249	MGI:1913989	Rcc1	0.864687
MGI:1915963	Ifitm1	1.20255	MGI:2448403	Hist1h2bl	0.688329
MGI:1339968	Cth	1.18343	MGI:1100881	Prss12	0.798333
MGI:2153183	Kcnn3	1.26188	MGI:2448443	Hist4h4	0.748586
MGI:1922715	Dynlrb2	1.30732	MGI:2448383	Hist1h2bf	0.736358
MGI:1891463	Gpr137b	1.20043	MGI:3026880	Fam124b	0.79955
MGI:1915122	Nsmce4a	1.19223	MGI:108559	Macf1	0.739287
MGI:2685410	Tmem212	1.32988	MGI:1353635	Lmcd1	0.7374
MGI:107373	Dnajc3	1.17013	MGI:1306797	Aoc3	0.795242
MGI:1346335	Tekt2	1.16786	MGI:1889277	Astn2	0.782091
MGI:1861606	Tacstd2	1.35081	MGI:1277173	Arhgef25	0.773201
MGI:3505790	Fcho2	1.21832	MGI:1918816	Clmp	0.711548
MGI:108025	Prkar2a	1.22693	MGI:1891217	Zfp423	0.853058
MGI:2148019	Jade3	1.20255	MGI:88375	Cenpa	0.814786
MGI:1201378	Anxa3	1.20389	MGI:88025	Ank2	0.84105
MGI:2661175	Cnksr2	1.11538	MGI:1916151	Gpr126	0.739572
MGI:102797	Acsl1	1.19392	MGI:2652872	Nynrin	0.783086
MGI:1913472	Serpinb1a	1.20084	MGI:1277980	Fgf18	0.76675
MGI:1347472	Foxa1	1.17545	MGI:2448407	Hist1h2bn	0.730643
MGI:95411	Erbb3	1.37494	MGI:1338823	Maz	0.845823
MGI:1920249	Insig2	1.18286	MGI:1196625	Fzd1	0.780993
MGI:2389008	Adamtsl4	1.21283	MGI:1891716	Emcn	0.740085
MGI:1918788	Fbxo9	1.17177	MGI:1196223	D8Ertd82e	0.677946
MGI:1344344	Dazap2	1.36805	MGI:1934569	Cpxm1	0.73973
MGI:98266	Sord	1.34428	MGI:1931523	Hist1h1a	0.676374
MGI:1919129	Acsl5	1.22327	MGI:2146855	Nrm	0.833133
MGI:88170	Blvra	1.2212	MGI:97290	Ndn	0.762759
MGI:99782	Nt5e	1.23438	MGI:1914705	Klhl13	0.793601
MGI:2685715	Heca	1.28314	MGI:1858229	Ppp1r3c	0.744392
MGI:2151071	C1galt1	1.18276	MGI:1349423	Racgap1	0.755509
MGI:2445210	Cyp4f39	1.30788	MGI:1923936	Clip3	0.81053
MGI:109516	Sftpb	1.17981	MGI:1194891	Gpc1	0.822938
MGI:107673	Akr1b8	1.27261	MGI:106020	St8sia2	0.816724
MGI:108451	Acaca	1.24596	MGI:94876	Ddc	0.818688
MGI:1924955	9230104L09Rik	1.58876	MGI:95556	Flna	0.771631
MGI:1915303	Ubxn2b	1.14011	MGI:106196	Stfa3	0.818666
MGI:1914618	Fam154b	1.19839	MGI:1913765	Cul7	0.82984
MGI:1924117	Rhbdd1	1.19268	MGI:1349453	Vsnl1	0.744606
MGI:104678	Tm4sf1	1.19237	MGI:2448399	Hist1h2bk	0.534827
MGI:1339975	Pak1	1.21608	MGI:1931527	Hist1h1e	0.677678
MGI:1333813	Mbd2	1.1283	MGI:1859274	Pdlim3	0.665708
MGI:1289192	Fbxo36	1.24905	MGI:1920371	Fam101a	0.825065
MGI:1353611	Sc5d	1.24925	MGI:104697	Muc5ac	0.667067
MGI:1923920	Ttc18	1.18138	MGI:1929744	Cdc42ep2	0.804821
MGI:1915802	Smim14	1.15024	MGI:2138915	Myl9	0.706712
MGI:1913819	Gdpd1	1.30431	MGI:3650682	Gm12913	0.52912
MGI:2686925	Cyb561a3	1.19276	MGI:1341098	Chil4	0.29472
MGI:1347245	Ceacam1	1.23947	MGI:3608341	Gapt	0.704712
MGI:108466	Ralbp1	1.22692	MGI:1933391	Maged2	0.720715
MGI:1924712	Tmem116	1.26372	MGI:102688	H2afx	0.765996
MGI:1916704	Clic3	1.27375	MGI:109249	Adamts1	0.697454
MGI:1316648	Ahnak	1.22315	MGI:1261768	Stbd1	0.810712
MGI:107498	Ltc4s	1.20392	MGI:1096340	E2f3	0.839262
MGI:1914114	Clec14a	1.25987	MGI:88269	Car2	0.759827
MGI:3583960	D030056L22Rik	1.21077	MGI:1915277	Tmem178	0.794583
MGI:1924378	Crebrf	1.29925	MGI:1914172	Rras2	0.804219
MGI:1921409	Acbd5	1.27048	MGI:98727	Tgfb3	0.722621
MGI:96560	Il6st	1.19701	MGI:109274	Trim28	0.828198
MGI:1917745	Atp6ap2	1.20485	MGI:2135601	Slc1a4	0.719285
MGI:1329044	Cldn3	1.27074	MGI:1921363	Exoc3l4	0.836894
MGI:1913415	Bccip	1.17404	MGI:1923373	Gpsm2	0.785932
MGI:2444274	Ccdc108	1.17788	MGI:1919244	Cnn3	0.77901
MGI:2386607	Abca5	1.2833	MGI:1919784	Rcc2	0.848034
MGI:2441773	Pcmtd1	1.2489	MGI:3524944	Stfa2l1	0.842553
MGI:1310004	Fmo5	1.19501	MGI:103072	Zyx	0.832114
MGI:1916377	Ociad2	1.2989	MGI:107956	Slc8a1	0.833259
MGI:1860485	Plek	1.25991	MGI:1100886	Prom1	0.768271
MGI:1914388	Herc6	1.17648	MGI:106197	Stfa2	0.816894
MGI:101781	Sntb1	1.21247	MGI:1346322	Gpc6	0.835372
MGI:2447362	Slc24a4	1.27472	MGI:97876	Rbp1	0.747577
MGI:1924151	Jade2	1.27351	MGI:107477	Stil	0.863671
MGI:1859149	Epb4.1l4b	1.20907	MGI:99254	Etv1	0.729147
MGI:1914621	Gtf3c6	1.18834	MGI:1920960	Tubb2b	0.76053
MGI:4845848	AK010878	1.254	MGI:1919810	Naalad2	0.801912
MGI:1344364	Usp18	1.21297	MGI:107687	Mdfi	0.857619
MGI:95585	Cidec	1.20604	MGI:5313075	Gm20628	0.650087
MGI:1917113	Ttc39b	1.18918	MGI:1860764	Pde3a	0.773612
MGI:1914097	Hint3	1.20491	MGI:107381	Epha1	0.784607
MGI:1919051	Plekhf2	1.18008	MGI:1341879	Zim1	0.823836
MGI:2385066	Rprd1a	1.25884	MGI:3588249	4930567H17Rik	0.728318
MGI:1341859	Gstz1	1.27419	MGI:2443012	Tns3	0.806977
MGI:1914367	Dynlt3	1.22714	MGI:2448306	Hist1h2ab	0.758784
MGI:1098233	Impact	1.22845	MGI:1316737	G0s2	0.697168
MGI:1097153	Cx3cl1	1.24606	MGI:2448300	Hist1h2an	0.700843
MGI:1353452	Aldh3a2	1.14521	MGI:1891221	Crtap	0.806177
MGI:1916051	Elovl5	1.21706	MGI:1344407	Zeb2	0.801917
MGI:1925213	Hook1	1.18004	MGI:3704296	Gm15501	0.663649
MGI:102890	Ccng1	1.20018	MGI:99912	Lama2	0.752983
MGI:107187	Bcl6	1.24191	MGI:2685837	Mettl21e	0.670028
MGI:1336166	Cflar	1.19969	MGI:1277991	Dach1	0.827191
MGI:2448481	Mgst2	1.21552	MGI:108470	St6gal1	0.81485
MGI:2444067	Pqlc3	1.25378	MGI:98181	Rrm2	0.745362
MGI:1289326	Gpn3	1.19928	MGI:104581	Gnb4	0.818242
MGI:2443220	Slc4a5	1.22308	MGI:102541	Tbx5	0.773456
MGI:1354175	Txnrd1	1.2148	MGI:99907	Plod1	0.798934
MGI:1096350	Fgfbp1	1.19356	MGI:1891209	Efemp2	0.80087
MGI:3041226	Akip1	1.19835	MGI:98510	Tcf3	0.833188
MGI:2442259	Gsap	1.24622	MGI:2448309	Hist1h2af	0.708035
MGI:1925179	Yipf6	1.19244	MGI:106035	Mki67	0.732644
MGI:103227	Cmah	1.2011	MGI:2147003	Arhgap28	0.74464
MGI:1352754	Clic4	1.1598	MGI:1347479	Foxf2	0.732338
MGI:1922783	Nme5	1.24507	MGI:1916320	Adamts9	0.69035
MGI:95482	Fah	1.33289	MGI:96435	Igf2r	0.801011
MGI:1924238	Rdh10	1.2027	MGI:1352502	Limd1	0.827286
MGI:1197007	Birc3	1.19425	MGI:2384945	Samd14	0.846171
MGI:2442933	Amn1	1.23188	MGI:95893	H1f0	0.772025
MGI:3038613	Rragb	1.15529	MGI:2147870	Lrch2	0.85843
MGI:1097706	Cetn3	1.25363	MGI:5477265	Gm26771	0.753222
MGI:1929938	Perp	1.2951	MGI:1890465	Ear11	0.436639
MGI:2146512	Slc7a4	1.23603	MGI:2442474	Dgkb	0.84121
MGI:3036245	Ralgapa2	1.28702	MGI:1924434	Fam64a	0.789612
MGI:1289279	Dnah9	1.16809	MGI:1933623	Smarcd1	0.839658
MGI:109618	Atp6v1b2	1.18931	MGI:98790	Top2a	0.718237
MGI:1310000	Kcnj15	1.30497	MGI:1099790	Plk2	0.676664
MGI:1915274	Hist1h2bc	1.46103	MGI:1098566	Gypc	0.826386
MGI:107622	Usp39	1.15528	MGI:88357	Cdk4	0.795092
MGI:1917912	Clic5	1.16502	MGI:107435	Cdh6	0.878728
MGI:2444725	Tmem154	1.20197	MGI:96909	Maf	0.837751
MGI:1342284	Slc34a2	1.15435	MGI:1923481	Igsf10	0.71349
MGI:1915842	Syf2	1.23891	MGI:1915909	Fam198b	0.80113
MGI:105940	Renbp	1.19878	MGI:1924994	Bora	0.879041
MGI:1921305	Plce1	1.27374	MGI:1859866	Cdc20	0.820149
MGI:108081	Sypl	1.17252	MGI:1925384	Lpar4	0.83669
MGI:895068	Lgals2	1.34296	MGI:2143977	Mbtd1	0.864345
MGI:894649	Ppfibp2	1.23764	MGI:97999	Ros1	0.815229
MGI:1344367	Grem2	1.21035	MGI:105377	Adam19	0.808617
MGI:2386853	Rassf4	1.23266	MGI:1098231	Kif11	0.792666
MGI:87994	Aldoa	1.19361	MGI:1932576	Akap12	0.772737
MGI:2385897	Tmem184a	1.24262	MGI:1921642	Specc1l	0.800734
MGI:3589109	Sgpp2	1.37847	MGI:3649945	Gm12651	0.723993
MGI:1353586	Lmo7	1.31488	MGI:1924265	Mpped2	0.853538
MGI:106598	Myo5b	1.21329	MGI:1915146	Ccdc80	0.701547
MGI:1346341	Rnf13	1.2019	MGI:105043	Ahr	0.814126
MGI:106402	Tmem30a	1.15306	MGI:1919257	Fndc3b	0.812523
MGI:103224	Fdx1	1.24031	MGI:95655	Gas1	0.831572
MGI:109553	Ctsc	1.2399	MGI:104589	Actg2	0.768797
MGI:1098236	Cast	1.19692	MGI:1891740	Dact1	0.80512
MGI:1355312	C1s	1.2612	MGI:88456	Col4a5	0.803271
MGI:88031	Anxa7	1.20555	MGI:2448293	Hist1h2ag	0.831319
MGI:1914344	Abhd2	1.22871	MGI:1347520	Ror1	0.831125
MGI:2145517	B3galnt2	1.16874	MGI:97548	Pfkm	0.828518
MGI:1923484	Magi3	1.21305	MGI:88336	Cd40	0.836964
MGI:109561	Sp100	1.28978	MGI:3645635	Gm8871	0.705056
MGI:96824	Tlr4	1.26141	MGI:96434	Igf2	0.794908
MGI:97852	Rap1a	1.29144	MGI:3039567	Ndufa4l2	0.819379
MGI:1914125	Swt1	1.20377	MGI:1918022	Zbtb9	0.773848
MGI:106034	Six4	1.20588	MGI:2685177	Megf10	0.836033
MGI:88381	F3	1.34926	MGI:1925751	Itih5	0.805665
MGI:2148866	Krt23	1.2336	MGI:894694	Galnt2	0.763404
MGI:700012	Ostf1	1.15868	MGI:1888504	Retnla	0.477613
MGI:1330284	Slc16a7	1.26976	MGI:105057	Cdh5	0.851616
MGI:1923241	Slain2	1.20111	MGI:5452643	Gm22866	0.604278
MGI:88108	Atp1b1	1.37662	MGI:2448322	Hist1h3d	0.817556
MGI:1914939	Aldh3b1	1.31294	MGI:1913303	Ypel1	0.86874
MGI:107720	Dnah12	1.2437	MGI:1914789	Dock6	0.828677
MGI:1923505	Pcgf5	1.17433	MGI:1277122	Rcn3	0.711089
MGI:2146322	Deptor	1.29517	MGI:1201678	Cacna1g	0.880082
MGI:1923824	Mfsd2a	1.40733	MGI:1347487	Foxm1	0.833108
MGI:1914848	Uchl5	1.23275	MGI:1338802	Shcbp1	0.861747
MGI:98178	Trim30a	1.25371	MGI:1890110	Robo2	0.713154
MGI:3652166	Ldlrad1	1.223	MGI:2384588	Neil3	0.88001
MGI:1914988	Ppid	1.182	MGI:1928098	Tspan3	0.822095
MGI:3612676	Ccdc68	1.34165	MGI:1202722	Gtf2i	0.86134
MGI:1922666	Nop14	1.18512	MGI:894806	Mylk	0.800755
MGI:1921455	Acsl3	1.20035	MGI:2448388	Hist1h2bj	0.690486
MGI:2384986	Rnf144b	1.23448	MGI:98726	Tgfb2	0.807219
MGI:1914760	Tvp23b	1.31676	MGI:1935127	Smarca1	0.815901
MGI:88431	Cnbp	1.14939	MGI:103294	Prg2	0.748976
MGI:94893	Cyb5r3	1.2509	MGI:95459	Zfp521	0.871209
MGI:1336173	Prkaa2	1.18726	MGI:98872	Twist1	0.868174
MGI:2389572	Brcc3	1.16881	MGI:1918882	Scn3b	0.748294
MGI:892014	Sfrp1	1.21093	MGI:108069	Ccna2	0.768968
MGI:104695	Scnn1g	1.21066	MGI:1919822	Spats2	0.809379
MGI:107443	Fpr1	1.5113	MGI:99916	Lamb2	0.830317
MGI:96704	Krt7	1.19771	MGI:2446134	Sidt2	0.834533
MGI:3650036	Gm13244	1.19975	MGI:87909	Acta2	0.743562
MGI:99551	Cdh13	1.22024	MGI:2448377	Hist1h2bb	0.815968
MGI:1339941	Cxcl15	1.22603	MGI:2442819	Tshz3	0.857589
MGI:2146574	Ildr1	1.20379	MGI:1931744	Uck2	0.865214
MGI:1330819	Osmr	1.29168	MGI:106247	Prpf19	0.85447
MGI:1891833	Pfkp	1.17742	MGI:88283	Serpinh1	0.788535
MGI:104583	Eps15	1.15816	MGI:5455590	Gm25813	0.494369
MGI:107933	Mns1	1.18874	MGI:105313	Cit	0.862153
MGI:1921809	Elovl7	1.18921	MGI:1915337	Dcakd	0.851235
MGI:1349216	Abcd3	1.17464	MGI:1913915	Msantd3	0.862212
MGI:1919367	Naa50	1.25899	MGI:1194921	Ttk	0.877484
MGI:96392	Icam1	1.21722	MGI:2443496	Sertad4	0.844968
MGI:88271	Cat	1.24606	MGI:3612184	Ccdc8	0.816868
MGI:1344037	Rpgr	1.18763	MGI:98834	Trp53	0.849491
MGI:1916782	Hopx	1.30653	MGI:2145425	Depdc1b	0.872582
MGI:1915409	Stx19	1.18913	MGI:103574	Amph	0.839632
MGI:1914145	Pxdc1	1.5571	MGI:2444633	Vstm4	0.8184
MGI:1926283	Tmem8	1.23843	MGI:107484	Rgl1	0.854737
MGI:88227	C3	1.32987	MGI:2444667	Kctd12b	0.858344
MGI:1350929	Asns	1.19515	MGI:2448297	Hist1h2ak	0.773031
MGI:2385129	Lrrc26	1.46379	MGI:2146156	Espl1	0.887461
MGI:1343094	Kat2b	1.20006	MGI:1917716	Ckap2l	0.846063
MGI:1931307	Slc19a3	1.29546	MGI:2443349	Parm1	0.849867
MGI:2384841	Chpt1	1.23212	MGI:2448419	Hist1h4a	0.784377
MGI:1201679	Cxadr	1.20204	MGI:1891916	Plag1	0.883552
MGI:1922679	Fam183b	1.25238	MGI:96982	Mif	0.831849
MGI:97394	Oat	1.2462	MGI:3643087	Pabpc4l	0.846919
MGI:104651	Cd82	1.21267	MGI:102682	Llgl1	0.860229
MGI:1315215	Dhrs3	1.19827	MGI:1316690	Igkj2	0.788951
MGI:1922818	Capsl	1.26758	MGI:2153089	Mrps2	0.881575
MGI:96617	Cd47	1.17987	MGI:97621	Plk1	0.787684
MGI:1095401	Hrsp12	1.29775	MGI:1344426	Esyt1	0.843214
MGI:1915912	Scgb3a1	1.87883	MGI:1341907	Fjx1	0.755583
MGI:101836	Traf1	1.3021	MGI:1915670	Ankrd13a	0.804473
MGI:104665	Soat1	1.22313	MGI:1919711	Prcp	0.733805
MGI:2384718	Cdc42ep3	1.27087	MGI:97357	Mycn	0.842702
MGI:1100870	Gcnt2	1.2244	MGI:1917600	Basp1	0.858859
MGI:95851	Gsn	1.21666	MGI:1338889	Uhrf1	0.797516
MGI:1927168	Dusp14	1.25205	MGI:2444336	Fcgbp	0.669619
MGI:99537	Rabggtb	1.2614	MGI:1349762	Dpysl3	0.804295
MGI:1917362	Sft2d2	1.24016	MGI:1926264	Tspan6	0.773375
MGI:2149821	Hsd17b11	1.23508	MGI:1922667	Rspo2	0.8094
MGI:2443511	Slc9a6	1.192	MGI:97830	Pygm	0.782569
MGI:1316717	Ifrd1	1.33299	MGI:107265	Cpd	0.844916
MGI:109137	Rasgrf2	1.25171	MGI:1100874	Plagl1	0.846059
MGI:1298382	Plp2	1.23841	MGI:2140750	Zfp518b	0.856053
MGI:95755	Slc2a1	1.27995	MGI:2444752	Ubtd2	0.846946
MGI:1891341	Lpin2	1.43068	MGI:1914270	Tmem88	0.798363
MGI:1926021	Mctp1	1.3409	MGI:5452757	Gm22980	0.685856
MGI:1890216	Slc6a14	1.43688	MGI:2442836	Brip1	0.886641
MGI:1915350	Sh3bgrl2	1.22499	MGI:1277214	2016-09-11	0.820282
MGI:2138811	Cdc123	1.17624	MGI:1858493	B4galt2	0.863725
MGI:2138319	Trp53bp2	1.22447	MGI:109532	Btg3	0.716063
MGI:1097717	Ankrd1	1.72056	MGI:3714351	1700047I17Rik2	0.790441
MGI:2148202	Ces1d	1.26387	MGI:1929096	Thsd1	0.862186
MGI:1346060	Tlr2	1.26028	MGI:1923385	Prex2	0.807098
MGI:1933113	Gpr146	1.20509	MGI:98926	Vcam1	0.818575
MGI:3647976	Gm4956	1.44196	MGI:1203727	Sema6a	0.82066
MGI:3041177	Taok3	1.22629	MGI:1277171	Dcx	0.88775
MGI:1916948	Slc52a3	1.26529	MGI:1933946	Ptov1	0.858842
MGI:1101781	Elf3	1.23303	MGI:1923580	Sephs1	0.873956
MGI:1915671	Lmbrd1	1.17972	MGI:3645587	Gm5806	0.76131
MGI:1924415	Atp6v0d2	1.43289	MGI:1354946	Mapk6	0.867777
MGI:1096344	Ampd3	1.299	MGI:1917943	Gpr125	0.844749
MGI:87890	Chrnb1	1.25846	MGI:2442308	Arl15	0.829264
MGI:1914098	Fuca2	1.19385	MGI:2667763	Retnlg	0.435604
MGI:2139461	Tmem62	1.27976	MGI:1098258	Kif15	0.876474
MGI:104517	Xrcc5	1.22545	MGI:1891125	Kcne4	0.792449
MGI:2385067	Lims2	1.43456	MGI:1915548	Ncapd2	0.81585
MGI:95678	Gda	1.36845	MGI:1315198	Cdca3	0.87844
MGI:1925482	Trappc6b	1.23222	MGI:101762	Elk3	0.867168
MGI:2388637	Wwc1	1.28174	MGI:96257	Hspg2	0.751181
MGI:96825	Selenbp1	1.5451	MGI:95275	Ebf1	0.828642
MGI:98973	Xdh	1.69941	MGI:1919787	Cdca2	0.881331
MGI:2139014	Osbpl6	1.256	MGI:105923	Ednra	0.798748
MGI:3644953	Gm4951	1.21461	MGI:1923714	Casc5	0.823938
MGI:1915440	5330426P16Rik	1.25131	MGI:1917207	Cdc16	0.863257
MGI:2140729	Zfand2a	1.21467	MGI:1919304	Cyp4f18	0.779175
MGI:1312922	Casp12	1.24258	MGI:2685054	Gpr161	0.867153
MGI:1918962	Dram1	1.223	MGI:2441849	Lpp	0.800563
MGI:2138143	AA986860	1.47733	MGI:2448423	Hist1h4d	0.75666
MGI:1338011	Auh	1.23206	MGI:97603	Pkd1	0.819287
MGI:98239	Scd1	1.34178	MGI:2449119	A2m	0.704189
MGI:3606159	Tmem243	1.25307	MGI:105084	Satb1	0.861986
MGI:1194909	Rsph1	1.25227	MGI:1924546	Fam162b	0.797498
MGI:103297	Atp7b	1.50414	MGI:99909	Lama3	0.79326
MGI:107718	Dnah5	1.28006	MGI:1270156	2016-09-04	0.818259
MGI:2384860	Slc44a3	1.23448	MGI:1919950	Zfp618	0.877448
MGI:103562	Hsd11b1	1.31085	MGI:3045722	Tmem255a	0.896632
MGI:3528937	Gramd2	1.25747	MGI:2146335	C330027C09Rik	0.829006
MGI:1918836	Ifih1	1.23288	MGI:2685142	Olfm4	0.864893
MGI:1926446	Cd274	1.26592	MGI:2676841	Mir15a	0.725331
MGI:1858219	Rcan2	1.27818	MGI:1919401	Rfc5	0.85064
MGI:104807	Pls3	1.24198	MGI:1919069	Kif23	0.806221
MGI:2669035	Tmc4	1.28983	MGI:107739	Casp3	0.839226
MGI:1337026	Sdcbp	1.21408	MGI:1858430	Scarf2	0.83899
MGI:104649	Cox6a2	1.21276	MGI:102694	Ptprm	0.829267
MGI:1346876	Map3k5	1.21406	MGI:1920174	Anln	0.818328
MGI:1919410	Tmem163	1.2191	MGI:1337131	Rev3l	0.825618
MGI:105975	Cfb	1.44942	MGI:108037	Figf	0.782886
MGI:99448	Ifi47	1.44231	MGI:2385276	Kctd15	0.873942
MGI:2681107	Siglec5	1.25882	MGI:104903	Gpc3	0.852885
MGI:1917977	Rasgef1a	1.24404	MGI:1099832	Tln1	0.8548
MGI:1915026	Vwa5a	1.20406	MGI:109233	Kif22	0.844524
MGI:97747	Pparg	1.31852	MGI:1345162	Adam23	0.844021
MGI:109609	Faah	1.22595	MGI:88111	Atp2b4	0.803127
MGI:1333844	Slc31a2	1.25849	MGI:1926252	Gipc1	0.846462
MGI:1932515	Plekha3	1.19011	MGI:1341110	Adcy8	0.791229
MGI:1933177	Pik3ap1	1.27636	MGI:1351331	Chaf1a	0.888258
MGI:1097695	Ezh1	1.20946	MGI:1338010	Hic1	0.855714
MGI:106603	Serpinb9	1.29833	MGI:2183441	Psat1	0.813499
MGI:108074	Sptlc2	1.19459	MGI:1098219	Hmgb3	0.849289
MGI:1914948	Fam174a	1.27613	MGI:1924020	2010005H15Rik	0.852036
MGI:2147706	AW112010	1.48803	MGI:2178742	Stab1	0.839011
MGI:2442342	Uspl1	1.18514	MGI:88255	Anxa6	0.832366
MGI:95588	Fth1	1.17337	MGI:108056	Nfia	0.835477
MGI:1927406	Herpud1	1.34438	MGI:109492	Oaz2	0.838257
MGI:1918483	Enkur	1.23579	MGI:109591	Nfic	0.867315
MGI:107936	Il18	1.38843	MGI:96185	Hoxb4	0.884393
MGI:1341297	Dapk2	1.245	MGI:1933947	Rtn1	0.862086
MGI:1928482	Mbnl1	1.14038	MGI:3704459	Gm10337	0.771989
MGI:96444	Igha	3.75846	MGI:1924384	Hnrnpa0	0.841396
MGI:1340051	Gpr56	1.25084	MGI:88549	Csrp1	0.873342
MGI:95479	Fabp1	1.44826	MGI:2444826	Vash2	0.86035
MGI:2157942	Cd209a	1.34993	MGI:104723	Fgf9	0.880971
MGI:107464	Plcb4	1.34286	MGI:2443098	Slc17a2	0.884208
MGI:103007	Epb4.1l4a	1.30682	MGI:97937	Rmrp	0.745625
MGI:1915988	Acss1	1.35265	MGI:1196356	Iqsec1	0.867958
MGI:1891340	Lpin1	1.32894	MGI:107672	Gpm6b	0.840009
MGI:1289274	Krr1	1.20528	MGI:1914698	Plxdc2	0.845812
MGI:1934852	Acox2	1.30338	MGI:109495	Nfil3	0.833571
MGI:1349721	Tob1	1.2814	MGI:1925139	Lbh	0.820086
MGI:107341	Ctss	1.30702	MGI:3652331	Trav13-3	0.753308
MGI:1338883	Gfpt2	1.38369	MGI:106012	Tagln	0.809953
MGI:2183535	Cytip	1.33985	MGI:1933825	Jam3	0.870112
MGI:2685127	Gm281	1.31646	MGI:101934	Tfdp1	0.864899
MGI:99852	Runx1	1.27411	MGI:1858896	Spast	0.86891
MGI:1930150	Popdc2	1.32702	MGI:107460	Cox6b1	0.796895
MGI:1919489	Parp14	1.24904	MGI:1347521	Ror2	0.863535
MGI:107744	Dnah6	1.27243	MGI:109523	Trpc6	0.840427
MGI:2387599	Prr15l	1.26665	MGI:1914448	Spats2l	0.856288
MGI:1914797	Slc39a8	1.38967	MGI:3045338	Mettl24	0.856638
MGI:1346056	Ctage5	1.24566	MGI:1922038	E2f8	0.882672
MGI:2444691	Tfcp2l1	1.28908	MGI:2387661	Sema6d	0.861857
MGI:2446181	Slc37a1	1.27409	MGI:2673709	Kntc1	0.895176
MGI:1926462	Hnrnph3	1.30578	MGI:98310	Ski	0.861486
MGI:1343085	Spop	1.33521	MGI:2447762	Yeats2	0.873381
MGI:1915268	Col4a3bp	1.31699	MGI:3650237	Gm13084	0.723474
MGI:1916648	Cdhr4	1.31186	MGI:107940	Ezh2	0.864067
MGI:1100842	Gfra1	1.26852	MGI:2676970	Sipa1l2	0.84554
MGI:1916316	1810010H24Rik	1.31516	MGI:1930187	Maged1	0.809822
MGI:87948	Adss	1.21085	MGI:96120	Hmgn1	0.844534
MGI:99513	Sdpr	1.24145	MGI:107168	Aurkb	0.849357
MGI:1924155	Lrg1	1.71057	MGI:103180	Tcf19	0.824641
MGI:2685113	Macc1	1.24065	MGI:98742	Thra	0.849791
MGI:1355295	Hmgn5	1.32631	MGI:2137495	Myocd	0.892292
MGI:2388479	Ppp2r5a	1.20265	MGI:1933820	Jam2	0.867033
MGI:1913536	Sec11c	1.25084	MGI:1195263	Lims1	0.866269
MGI:2138391	Pid1	1.25776	MGI:3028642	Iqgap3	0.875067
MGI:95521	Fgf7	1.37011	MGI:99611	Ephb2	0.891458
MGI:1933754	Nedd4l	1.23886	MGI:3028499	Adamtsl3	0.842452
MGI:107728	Myo1d	1.22773	MGI:88070	Arg1	0.833746
MGI:1916120	Ak8	1.24404	MGI:1298393	Sh3pxd2a	0.851486
MGI:88017	Mat1a	1.22595	MGI:1915581	Obfc1	0.858831
MGI:1321385	Entpd5	1.21972	MGI:1351597	Atp5l	0.759733
MGI:1926134	Zdhhc3	1.23874	MGI:1921761	Lrrc17	0.778061
MGI:1918956	Slc46a3	1.23325	MGI:2446854	Gpr64	0.874758
MGI:98233	Sat1	1.29658	MGI:1915116	Wfdc1	0.80137
MGI:1354713	Acsl4	1.28932	MGI:102551	Ccnf	0.85243
MGI:3643262	Gm9392	1.4198	MGI:2447063	Tenm4	0.894009
MGI:1354184	Nox4	1.30702	MGI:1337006	Hapln1	0.850172
MGI:2441659	Lamp3	1.29498	MGI:1276112	Cldn5	0.815361
MGI:2443248	Exph5	1.2707	MGI:1921054	Kif2c	0.867835
MGI:97004	Mme	1.34375	MGI:1919214	Atad3a	0.899419
MGI:1915783	Mphosph6	1.26237	MGI:1916189	Rasl11b	0.841396
MGI:1929270	Dstn	1.27365	MGI:2135755	Cox4i2	0.865782
MGI:1309515	Gsta4	1.34617	MGI:102897	Pcsk6	0.857024
MGI:1931437	Smpdl3a	1.26047	MGI:103219	Meox2	0.768617
MGI:87871	Acat2	1.24755	MGI:108174	Prkg1	0.825285
MGI:88596	Cyp2a4	1.48872	MGI:107682	Ppp1r14b	0.839486
MGI:2158417	Rtkn2	1.34532	MGI:1289156	Pbk	0.822757
MGI:1917535	Rpf1	1.20511	MGI:106924	Melk	0.872903
MGI:2443778	A330021E22Rik	1.23386	MGI:3045303	Mamld1	0.865338
MGI:101782	Scnn1a	1.38992	MGI:1921738	Lrrc15	0.889413
MGI:1919341	Snhg7	1.63623	MGI:1861942	Gtf2ird1	0.876328
MGI:1919531	Sh2d4a	1.38636	MGI:98373	Sparc	0.886394
MGI:1194898	Ppl	1.47298	MGI:894697	Rad54l	0.896777
MGI:96242	Hspd1	1.3862	MGI:1915301	Nutf2	0.85486
MGI:1913961	Sbds	1.27685	MGI:106913	Abi2	0.877386
MGI:1920325	Ppil6	1.32818	MGI:99612	Epha3	0.858011
MGI:1278336	Cdkl5	1.32622	MGI:3650834	Gm11249	0.857283
MGI:1914951	Wfdc2	1.43719	MGI:1914632	Brd3	0.885713
MGI:1932682	Cxcl16	1.32737	MGI:3710643	Gm10135	0.795659
MGI:1928895	Isg20	1.31257	MGI:1351485	Phlda3	0.82737
MGI:107588	Gjb6	1.23985	MGI:1891445	Peli2	0.855706
MGI:3603594	Flrt2	1.20407	MGI:1930943	Rrad	0.841004
MGI:2156378	Rnf39	1.56455	MGI:2443399	D930015E06Rik	0.888471
MGI:1289258	Wdr96	1.24251	MGI:104606	Rab34	0.847929
MGI:2142610	Snx25	1.27401	MGI:98277	Epha4	0.844554
MGI:1890645	Nek7	1.26144	MGI:2135937	Sbk1	0.903254
MGI:107200	Cbr2	1.21454	MGI:1100508	Kcnj8	0.868825
MGI:1338031	Spint2	1.23786	MGI:1921019	Gins2	0.878821
MGI:105080	Tgoln1	1.21937	MGI:97475	Pam	0.858329
MGI:1354388	Spag6	1.26065	MGI:1347470	Foxf1	0.850336
MGI:93830	Adipor2	1.2859	MGI:1916966	Trip13	0.871545
MGI:98919	Scgb1a1	1.23175	MGI:3642670	Gm15428	0.610692
MGI:1913101	Cldn10	1.33218	MGI:1202880	Traf4	0.89586
MGI:1913646	Ccdc82	1.3581	MGI:1298227	Mcm6	0.840442
MGI:99450	Ifit1	1.35088	MGI:1915201	Tubb6	0.776758
MGI:2143990	Parp12	1.21704	MGI:1351326	Nrk	0.907843
MGI:1890221	Fetub	1.28987	MGI:98725	Tgfb1	0.885064
MGI:1924209	Chmp5	1.27341	MGI:1914371	Mastl	0.888504
MGI:3052471	Slc2a12	1.32553	MGI:107861	Tubb2a	0.791206
MGI:2146607	Clic6	1.33331	MGI:1888513	Fzd2	0.862656
MGI:1914055	Tspan1	1.49647	MGI:1333817	Slc22a3	0.829563
MGI:106653	Epcam	1.22775	MGI:107363	Stxbp1	0.864994
MGI:1336155	Lss	1.24604	MGI:1336214	Khsrp	0.874698
MGI:2673128	AB041803	1.56446	MGI:104897	Rest	0.860869
MGI:104809	Pls1	1.2798	MGI:1315201	Grcc10	0.804018
MGI:1929865	Nampt	1.36394	MGI:1915871	Mthfd2l	0.898751
MGI:109634	Terf1	1.32558	MGI:1306805	Tff2	0.706153
MGI:1346878	Map3k8	1.20395	MGI:1915426	Fam212a	0.869335
MGI:1913850	Mgst1	1.54633	MGI:2448421	Hist1h4c	0.806876
MGI:1914931	Mrpl18	1.22727	MGI:1913609	Cox20	0.819891
MGI:107362	Stxbp3a	1.27907	MGI:98371	Sox9	0.881815
MGI:1330223	Papss2	1.48542	MGI:3045342	Zfp711	0.847807
MGI:88354	Cdh1	1.27208	MGI:96599	Itga1	0.812566
MGI:1891123	Kcne2	1.27957	MGI:88106	Atp1a2	0.834198
MGI:1921590	Ahcyl2	1.46141	MGI:1920480	Bmper	0.85688
MGI:95904	H2-K1	1.49868	MGI:1313302	Cenpf	0.866258
MGI:1858210	Stx7	1.24344
MGI:2442495	Agmo	1.50096
MGI:97798	Ptgs2	1.49003
MGI:1920795	1700094D03Rik	1.46818
MGI:2655562	Eltd1	1.32804
MGI:104888	Fdps	1.38383
MGI:1914353	Ptgr1	1.29332
MGI:96250	Hsp90aa1	1.50881
MGI:2144095	Sec14l4	1.48878
MGI:1915077	Aldh6a1	1.36052
MGI:1095410	Tuba4a	1.26266
MGI:2387642	Cxcl17	1.46039
MGI:96819	Anxa1	1.36862
MGI:1340024	Aldh1l1	1.38317
MGI:2685591	Kcnrg	1.32363
MGI:2675603	Trpm6	1.30503
MGI:2443049	D230025D16Rik	1.31313
MGI:97769	Prnp	1.31541
MGI:97879	Rbp4	1.32777
MGI:1913391	Ifitm3	1.35601
MGI:1355313	C1ra	1.30855
MGI:88235	C7	1.66796
MGI:1927339	Mpp5	1.50469
MGI:1917379	Slc44a4	1.29575
MGI:97463	P4ha1	1.34531
MGI:1930153	Popdc3	1.24726
MGI:1926952	Cyb5	1.40391
MGI:107527	Ly6a	1.43923
MGI:1922806	1700026D08Rik	1.29121
MGI:88423	Clu	1.47918
MGI:1338033	Spint1	1.31218
MGI:2682634	Enpp4	1.43606
MGI:1922989	Mpp7	1.32284
MGI:96955	Slc3a2	1.28339
MGI:1891259	Lrat	1.95881
MGI:1351469	Plekhb1	1.43036
MGI:1914400	Rnf141	1.24613
MGI:1917997	Tspan2	1.44142
MGI:2685387	Atp13a3	1.44323
MGI:3645252	Gm5844	1.5877
MGI:96417	Ids	1.39844
MGI:102963	Inmt	1.34084
MGI:95515	Fgf1	1.30044
MGI:104684	Eps8	1.24334
MGI:104850	Cd55	1.35922
MGI:1915776	Gpr155	1.30089
MGI:109572	Tuft1	1.48856
MGI:98352	Sod2	1.27191
MGI:1916577	1700007K13Rik	1.41839
MGI:1858179	Nucb2	1.39146
MGI:1919100	Clip4	1.41301
MGI:2157910	Mlc1	1.34268
MGI:97796	Ptgfr	1.3117
MGI:1859682	Slc23a2	1.37714
MGI:109380	Il10rb	1.25083
MGI:103123	Serpinb6a	1.21909
MGI:1919979	Cdc42se2	1.22554
MGI:1349480	Scamp1	1.2738
MGI:1913540	Atp6v1g1	1.29299
MGI:1270840	Ehf	1.33855
MGI:1918000	Kdsr	1.32658
MGI:1351668	Abca8b	1.3477
MGI:101863	Aldoc	1.28947
MGI:1926217	Rnase4	1.39392
MGI:1923195	Tmem56	1.35124
MGI:2443191	Nceh1	1.30542
MGI:1890410	Acss2	1.35381
MGI:1919308	Igsf5	1.3225
MGI:95933	H2-Q4	1.42245
MGI:1925225	Tmem50b	1.26506
MGI:1330812	Acox1	1.26023
MGI:894288	Sepp1	1.31523
MGI:2147914	Nxt2	1.27119
MGI:96693	Krt19	1.41731
MGI:3027894	Rsph4a	1.34316
MGI:1858305	Pgrmc1	1.34746
MGI:1351618	Dnajb9	1.4549
MGI:102706	Fdft1	1.40747
MGI:97744	Por	1.39722
MGI:1922925	Mfsd6	1.36067
MGI:1918142	Ttll7	1.35771
MGI:97010	Mmp3	1.60717
MGI:104696	Scnn1b	1.40311
MGI:1924919	Arhgef38	1.31186
MGI:1914323	Pi4k2b	1.27894
MGI:96765	Ldlr	1.4351
MGI:1924214	2610028H24Rik	1.47601
MGI:2442082	Tmem30b	1.34302
MGI:96882	Ly6c1	1.47912
MGI:1923930	5330417C22Rik	1.41126
MGI:1341903	Slc23a1	1.28007
MGI:1916014	Cdhr3	1.53532
MGI:1277238	Wdr52	1.35015
MGI:1347050	Aldh1a7	1.4158
MGI:103060	Ecm1	1.38717
MGI:2146021	Mal2	1.33649
MGI:1891228	Scel	1.82778
MGI:1918970	Osbpl3	1.36085
MGI:1926002	Csgalnact2	1.24457
MGI:87938	Adrb2	1.47336
MGI:1923759	Plet1	1.49751
MGI:1922004	Dhcr24	1.34123
MGI:894320	Prdx6	1.41664
MGI:1916730	Ttc9	1.36239
MGI:1858959	Elovl1	1.51995
MGI:2652845	Cdc42bpg	1.53315
MGI:2386846	Abca8a	1.5229
MGI:105383	Il18r1	1.45971
MGI:96916	Maob	1.41018
MGI:1861728	Wwp1	1.28042
MGI:1921377	Krt80	1.45091
MGI:96211	Hp	1.55446
MGI:2444966	Tecrl	1.37304
MGI:1923784	Osbpl9	1.28133
MGI:1913493	C1galt1c1	1.46816
MGI:1917258	Ace2	1.36766
MGI:2388029	Liph	1.53484
MGI:2145738	Fam216b	1.40925
MGI:88030	Anxa4	1.29675
MGI:894286	P4ha2	1.54606
MGI:1924013	Mospd2	1.2838
MGI:2444628	Sh3rf2	1.55547
MGI:1914701	Pkp2	1.31763
MGI:2655401	Scgb1c1	1.44143
MGI:106040	Cyp51	1.33166
MGI:1918903	4930506M07Rik	1.35676
MGI:1919643	Faim2	1.58386
MGI:1915654	Nrn1	1.58471
MGI:95321	Emb	1.45289
MGI:1917585	Reep6	1.39095
MGI:107422	Hspa4l	1.53376
MGI:106609	Gpx2	1.44695
MGI:98364	Sox2	1.40161
MGI:2147043	Rmdn2	1.36391
MGI:1923703	Prss23	1.4058
MGI:88378	Ces1g	1.82888
MGI:3781032	Kcnj13	1.46857
MGI:2137698	Ugt1a6a	1.63457
MGI:1338036	Bpifa1	3.60108
MGI:1313266	Alcam	1.24706
MGI:2151110	Prelp	1.49758
MGI:107930	Pip5k1b	1.4487
MGI:1919277	Slc39a4	1.60373
MGI:3617848	Sec14l3	1.39377
MGI:1099438	Nsdhl	1.35675
MGI:1921384	Cyp2s1	1.56646
MGI:1926051	Ak7	1.4108
MGI:88597	Cyp2a5	2.17687
MGI:109536	Itih4	1.62107
MGI:109296	Sqle	1.43869
MGI:88253	Car8	1.49459
MGI:1933172	Chrdl1	1.44478
MGI:1355324	Grb14	1.38814
MGI:1344382	Creg1	1.45511
MGI:107592	Hmgcs1	1.39787
MGI:96969	Met	1.35099
MGI:1933830	Enpp5	1.42027
MGI:1916523	Mettl7a1	1.45886
MGI:106686	Pon3	1.35501
MGI:95432	Ces1e	1.42959
MGI:1915091	Atg3	1.38064
MGI:1889209	Gipc2	1.38529
MGI:1913675	Pcp4l1	1.71758
MGI:1353451	Aldh3a1	1.58196
MGI:87989	Alas1	1.51351
MGI:1923658	Abcc3	1.4222
MGI:104990	Gclc	1.56458
MGI:88385	Cfh	1.68329
MGI:2385825	Plekhb2	1.45772
MGI:2444210	Nr1d1	2.95201
MGI:105102	Gpx3	1.72278
MGI:1916906	Pir	1.36073
MGI:1914075	Rnf186	1.46842
MGI:109518	Sftpa1	1.27456
MGI:1270860	Plscr2	1.53746
MGI:2142763	Cyp4v3	1.50213
MGI:1918521	Gca	1.4927
MGI:2153181	Hnmt	1.46038
MGI:1916289	Insig1	1.64217
MGI:1926142	Crispld2	1.79716
MGI:88035	Aox1	1.77712
MGI:88348	Cd9	1.39705
MGI:2135756	Hspb8	1.67215
MGI:95405	Ephx1	1.66602
MGI:2448565	Rasef	1.40527
MGI:94872	Dcn	1.85629
MGI:103225	Cyp4b1	2.11616
MGI:1913857	Ms4a4d	2.51226
MGI:2442264	Idi1	1.75459
MGI:88588	Cyp1a1	4.09145
MGI:99478	Cckar	1.70038
MGI:2387597	Gabrp	1.95756
MGI:1926341	Sult1d1	2.08607
MGI:1889385	Crebl2	1.80755
MGI:98775	Tmod1	1.77395
MGI:1100496	Fmo3	2.64493
MGI:1101055	Ifit3	1.70469
MGI:1353450	Aldh1a1	1.60686
MGI:96441	Igfbp6	2.12766
MGI:1913484	Sc4mol	1.74881
MGI:107671	Gpm6a	2.04481
MGI:88608	Cyp2f2	1.61739
MGI:1339998	Efemp1	1.89668
MGI:88598	Cyp2b10	3.64701
MGI:1918974	Aox3	2.30749
MGI:103295	Pon1	2.76222
MGI:95860	Gstm1	1.82539
MGI:95856	Gsta3	2.95086
