# Supplementary material for: Temporal dynamics of the developing lung transcriptome in three common inbred strains of laboratory mice reveals multiple stages of postnatal alveolar development
Source: PeerJ journal article supplement (doi:10.7717/peerj.2318), 2016-08-09

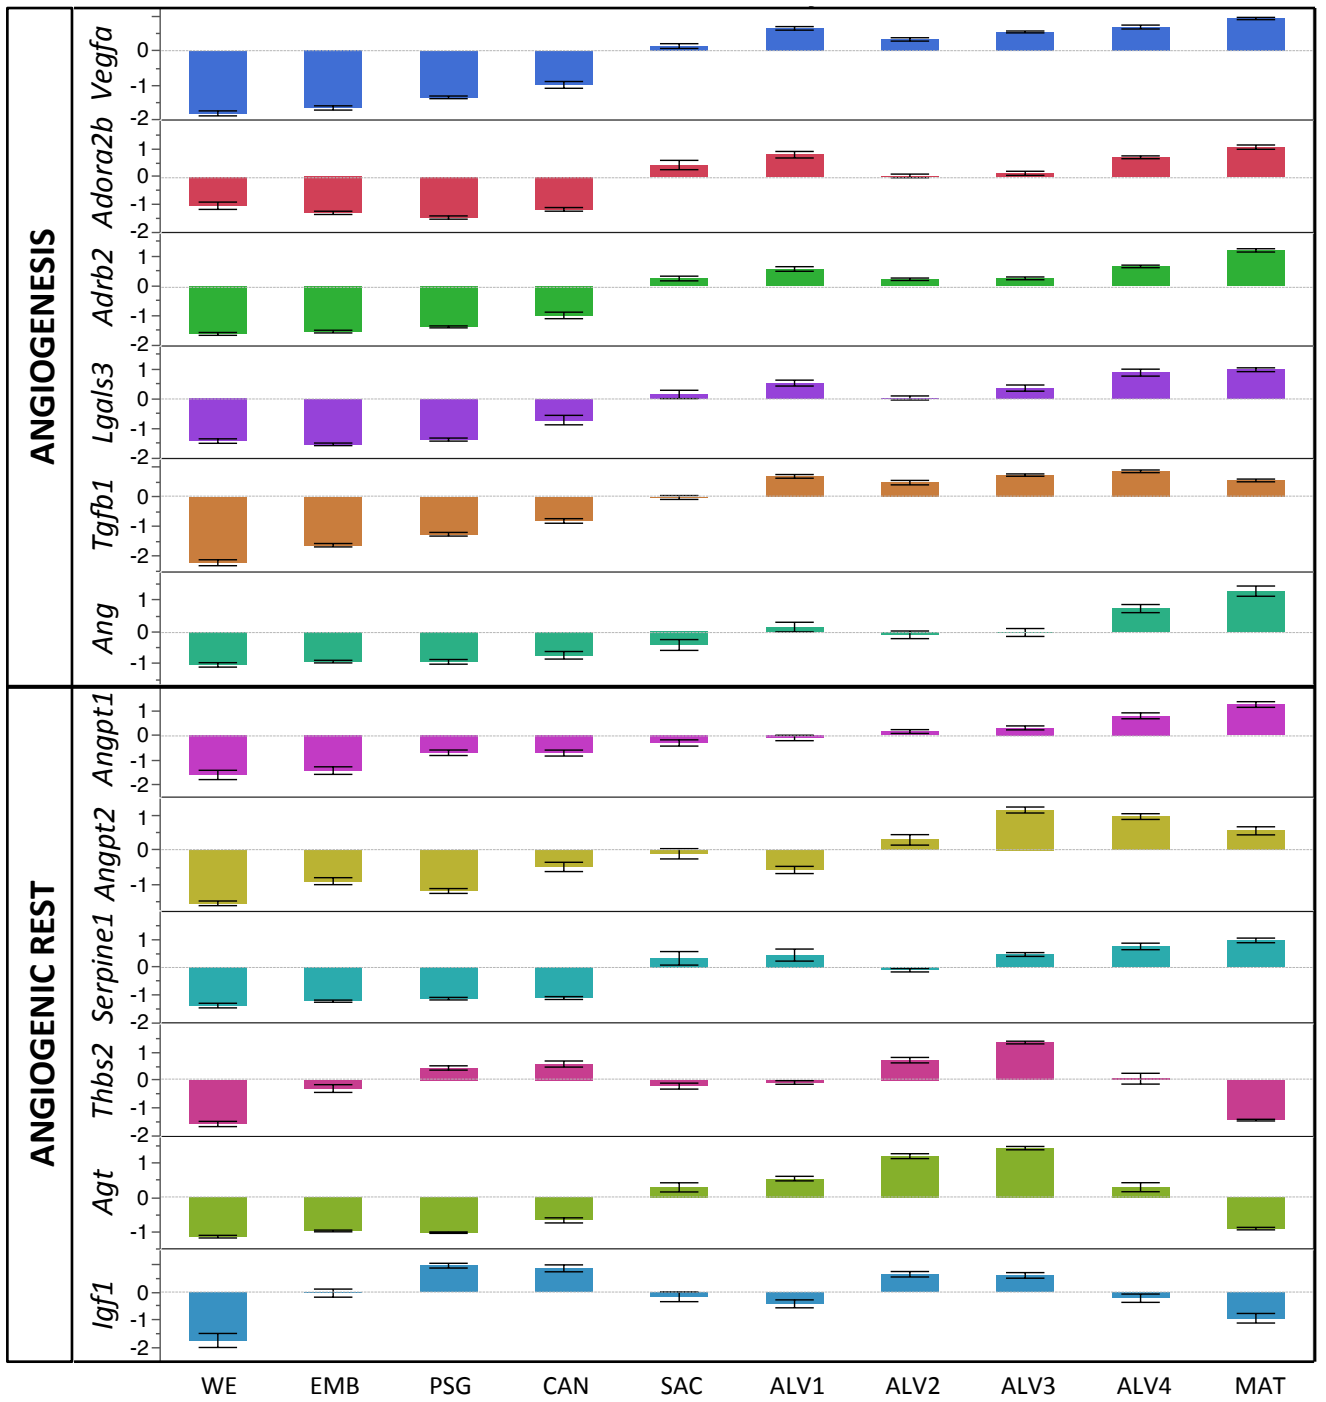

Supplement: FigureS3.pdf [file FigureS3.pdf]
