# Supplementary material for: Temporal dynamics of the developing lung transcriptome in three common inbred strains of laboratory mice reveals multiple stages of postnatal alveolar development
Source: PubMed Central journal article supplement (PMC4991849; doi:10.7717/peerj.2318), 2016-08-09
Supplement: peerj-04-2318-s015.pdf [file peerj-04-2318-s015.pdf]

| MGI ID      | Symbol         | WE | EMB | PSG | CAN | SAC | ALV1 | ALV2 | ALV3 | ALV4 | HOM | PC1   | PC2   | PC3   |
|-------------|----------------|----|-----|-----|-----|-----|------|------|------|------|-----|-------|-------|-------|
| MGI:1351617 | <i>Abca3</i>   |    |     |     |     |     |      |      |      |      |     | -0.96 | 0.16  | 0.10  |
| MGI:893592  | <i>Ager</i>    |    |     |     |     |     |      |      |      |      |     | -0.97 | 0.17  | 0.06  |
| MGI:106215  | <i>Aqp5</i>    |    |     |     |     |     |      |      |      |      |     | -0.97 | -0.10 | -0.02 |
| MGI:99480   | <i>Cebpa</i>   |    |     |     |     |     |      |      |      |      |     | -0.89 | 0.13  | 0.26  |
| MGI:88388   | <i>Cftr</i>    |    |     |     |     |     |      |      |      |      |     | -0.54 | 0.39  | 0.19  |
| MGI:1306784 | <i>Cited2</i>  |    |     |     |     |     |      |      |      |      |     | -0.57 | 0.17  | 0.32  |
| MGI:2447167 | <i>Cmtm8</i>   |    |     |     |     |     |      |      |      |      |     | -0.65 | 0.28  | 0.43  |
| MGI:95537   | <i>Ctgf</i>    |    |     |     |     |     |      |      |      |      |     | -0.94 | 0.02  | -0.07 |
| MGI:1339941 | <i>Cxcl15</i>  |    |     |     |     |     |      |      |      |      |     | -0.96 | 0.16  | 0.06  |
| MGI:1858599 | <i>Egfl6</i>   |    |     |     |     |     |      |      |      |      |     | -0.71 | 0.53  | 0.22  |
| MGI:95523   | <i>Fgfr2</i>   |    |     |     |     |     |      |      |      |      |     | -0.22 | 0.51  | 0.47  |
| MGI:1347474 | <i>Foxj1</i>   |    |     |     |     |     |      |      |      |      |     | -0.70 | 0.17  | 0.41  |
| MGI:1914004 | <i>Foxp1</i>   |    |     |     |     |     |      |      |      |      |     | -0.51 | -0.03 | -0.30 |
| MGI:2148705 | <i>Foxp2</i>   |    |     |     |     |     |      |      |      |      |     | 0.82  | 0.25  | 0.13  |
| MGI:1888513 | <i>Fzd2</i>    |    |     |     |     |     |      |      |      |      |     | 0.88  | 0.30  | -0.02 |
| MGI:1891250 | <i>Gprc5a</i>  |    |     |     |     |     |      |      |      |      |     | -0.97 | 0.16  | 0.09  |
| MGI:104853  | <i>Hes1</i>    |    |     |     |     |     |      |      |      |      |     | -0.70 | 0.14  | 0.01  |
| MGI:1916782 | <i>Hopx</i>    |    |     |     |     |     |      |      |      |      |     | -0.94 | 0.11  | 0.22  |
| MGI:96397   | <i>Id2</i>     |    |     |     |     |     |      |      |      |      |     | 0.47  | 0.36  | 0.22  |
| MGI:96689   | <i>Krt15</i>   |    |     |     |     |     |      |      |      |      |     | 0.04  | 0.57  | 0.51  |
| MGI:96897   | <i>Lyz2</i>    |    |     |     |     |     |      |      |      |      |     | -0.98 | 0.10  | 0.02  |
| MGI:97231   | <i>Muc1</i>    |    |     |     |     |     |      |      |      |      |     | -0.91 | 0.28  | 0.18  |
| MGI:97357   | <i>Mycn</i>    |    |     |     |     |     |      |      |      |      |     | 0.95  | -0.09 | -0.16 |
| MGI:97363   | <i>Notch1</i>  |    |     |     |     |     |      |      |      |      |     | -0.75 | 0.15  | -0.31 |
| MGI:97530   | <i>Pdgfra</i>  |    |     |     |     |     |      |      |      |      |     | -0.47 | -0.28 | 0.08  |
| MGI:98919   | <i>Scgb1a1</i> |    |     |     |     |     |      |      |      |      |     | -0.96 | -0.01 | -0.07 |
| MGI:2153470 | <i>Scgb3a2</i> |    |     |     |     |     |      |      |      |      |     | -0.89 | 0.18  | 0.21  |
| MGI:107558  | <i>Sema3a</i>  |    |     |     |     |     |      |      |      |      |     | -0.51 | 0.14  | 0.17  |
| MGI:109516  | <i>Sftpb</i>   |    |     |     |     |     |      |      |      |      |     | -0.97 | 0.12  | 0.05  |
| MGI:109517  | <i>Sftpc</i>   |    |     |     |     |     |      |      |      |      |     | -0.85 | 0.39  | 0.07  |
| MGI:109515  | <i>Sftpd</i>   |    |     |     |     |     |      |      |      |      |     | -0.96 | -0.08 | 0.03  |
| MGI:98371   | <i>Sox9</i>    |    |     |     |     |     |      |      |      |      |     | 0.93  | 0.12  | 0.11  |
| MGI:98726   | <i>Tgfb2</i>   |    |     |     |     |     |      |      |      |      |     | 0.07  | 0.69  | -0.42 |
| MGI:98790   | <i>Top2a</i>   |    |     |     |     |     |      |      |      |      |     | 0.91  | 0.28  | -0.12 |
| MGI:103178  | <i>Vegfa</i>   |    |     |     |     |     |      |      |      |      |     | -0.97 | -0.03 | -0.05 |
