# Supplementary material for: Temporal dynamics of the developing lung transcriptome in three common inbred strains of laboratory mice reveals multiple stages of postnatal alveolar development
Source: PubMed Central journal article supplement (PMC4991849; doi:10.7717/peerj.2318), 2016-08-09

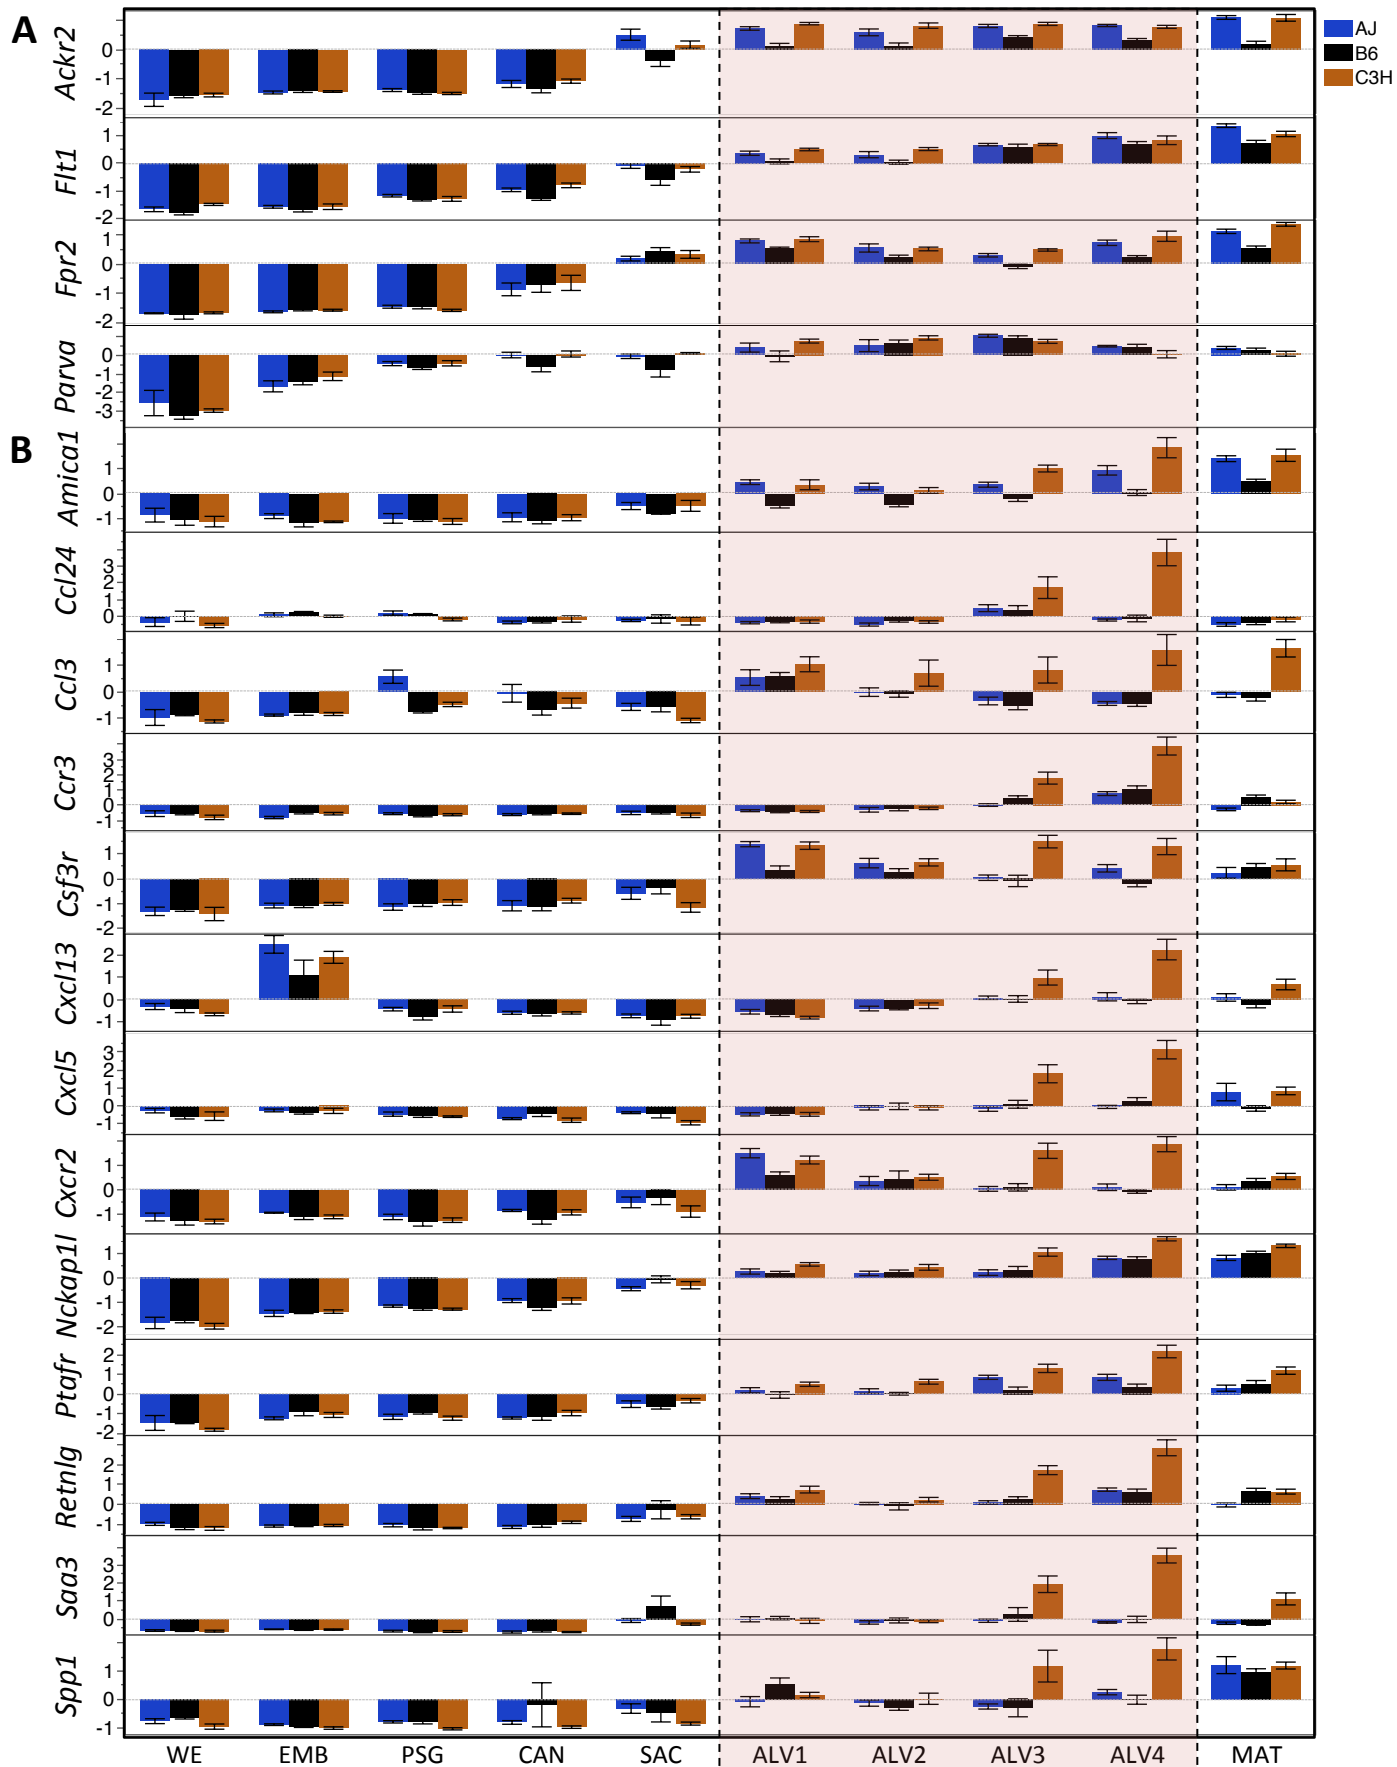

Supplement: peerj-04-2318-s016.pdf [file peerj-04-2318-s016.pdf]
