# Supplementary material for: Temporal dynamics of the developing lung transcriptome in three common inbred strains of laboratory mice reveals multiple stages of postnatal alveolar development
Source: PubMed Central journal article supplement (PMC4991849; doi:10.7717/peerj.2318), 2016-08-09
Supplement: peerj-04-2318-s022.pdf [file peerj-04-2318-s022.pdf]

| Tukey's multiple comparisons test          |     | Mean diff. | 95% confidence limits                              | Adjusted p value | Regression significant? | qPCR significant? |
|--------------------------------------------|-----|------------|----------------------------------------------------|------------------|-------------------------|-------------------|
| <b>Fggy (AJ &lt; B6 &lt; C3H)</b>          |     |            |                                                    |                  |                         |                   |
| A/J vs. C57BL6J                            | A-B | -0.0001722 | -4.798x10 <sup>-4</sup> to 1.353x10 <sup>-4</sup>  | 0.2738           | Yes                     | No                |
| A/J vs. C3H/HeJ                            | A-C | -0.0006147 | -9.222x10 <sup>-4</sup> to -3.071x10 <sup>-4</sup> | 0.0021           | Yes                     | Yes               |
| C57BL6J vs. C3H/HeJ                        | B-C | -0.0004424 | -7.499x10 <sup>-4</sup> to -1.349x10 <sup>-4</sup> | 0.0107           | Yes                     | Yes               |
| <b>Saa3 (AJ &lt; B6 &lt;&lt; C3H)</b>      |     |            |                                                    |                  |                         |                   |
| A/J vs. C57BL6J                            | A-B | -0.01083   | -0.22650 to 0.20480                                | 0.9870           | No                      | No                |
| A/J vs. C3H/HeJ                            | A-C | -0.2689    | -0.48450 to -0.05319                               | 0.0204           | Yes                     | Yes               |
| C57BL6J vs. C3H/HeJ                        | B-C | -0.258     | -0.47370 to -0.04236                               | 0.0243           | Yes                     | Yes               |
| <b>Wnt11 (AJ &lt;&lt; B6 &gt;&gt; C3H)</b> |     |            |                                                    |                  |                         |                   |
| A/J vs. C57BL6J                            | A-B | -0.03237   | -0.06789 to 0.00316                                | 0.0702           | Yes                     | No                |
| A/J vs. C3H/HeJ                            | A-C | 0.01641    | -0.01911 to 0.05193                                | 0.3909           | No                      | No                |
| C57BL6J vs. C3H/HeJ                        | B-C | 0.04878    | 0.01326 to 0.08430                                 | 0.0132           | Yes                     | Yes               |
| <b>Wif1 (AJ &gt;&gt; B6 ≈ C3H)</b>         |     |            |                                                    |                  |                         |                   |
| A/J vs. C57BL6J                            | A-B | 0.003328   | 0.002553 to 0.004103                               | <0.0001          | Yes                     | Yes               |
| A/J vs. C3H/HeJ                            | A-C | 0.003306   | 0.002531 to 0.004081                               | <0.0001          | Yes                     | Yes               |
| C57BL6J vs. C3H/HeJ                        | B-C | -2.152e-05 | -7.96x10 <sup>-4</sup> to 7.54x10 <sup>-4</sup>    | 0.9960           | No                      | No                |
